# Supplementary material
Source: publisher figshare collection journal article supplement (https://diabetesjournals.figshare.com/articles/dataset/_/25044500)
Supplement: Supplementary file 1 [file 2]

## Sheet: Figure 1
Graph 1B	Region 1	Region 2	Region 3	Region 4	Region 5
	Average	Average	Average	Average	Average
Pancreas-Alpha	0.273333	0.226667	0.736667	0.663333	0.716667
Pancreas-T2D-Alpha	0.275	0.29	0.72	0.695	0.76
Pancreas-Beta	0	0	0.00333333	0.03	0.0233333
Pancreas-T2D-Beta	0.015	0.0175	0.045	0.02	0.0425
Pancreas-Delta	0.366667	0.306667	0.846667	0.703333	0.836667
Pancreas-T2D-Delta	0.3	0.305	0.815	0.805	0.835
Pancreas-Acinar	0.43	0.45	0.23	0.3775	0.59
Pancreas-Duct	0.7275	0.73	0.87	0.885	0.855
Pancreas-Endothel	0.753333	0.74	0.833333	0.803333	0.85
Pancreas-Islet-Endothel	0.81	0.79	0.88	0.83	0.84
Blood-B	0.72	0.736667	0.643333	0.796667	0.82
Blood-Granulocytes	0.766667	0.753333	0.92	0.87	0.913333
Blood-Monocytes	0.836667	0.826667	0.943333	0.896667	0.916667
Blood-NK	0.77	0.793333	0.916667	0.846667	0.86
Blood-T-CD3	0.76	0.78	0.865	0.835	0.875
Blood-T-CD4	0.816667	0.82	0.896667	0.796667	0.873333
Blood-T-CD8	0.676667	0.69	0.87	0.736667	0.84
Graph 1C
	Alpha			Beta			Delta			Acinar					Duct			Endothelial
	PDX1-AS1	CCDC73	PELI2	Insulin	FBXL19	DLG5	ZBTB7C	RPGRIP1L	UBLCP1	PTPRE	PRDM2	GRB10	FBXW12	SPATA21	BZW2	COL27A1	HUNK	RB1	CMIP	ST5
Pancreas-Alpha	0.756667	0.01	0.03	0.72	0.656716	0.855556	0.947917	0.955556	0.965909	0.909836	0.967742	0.954023	0.959184	0.953271	0.988372	0.954545	0.990385	0.938053	0.971698	0
Pancreas-T2D-Alpha	0.72	0	0.005	0.745	0.733333	0.833333	0.914894	0.942308	0.957447	0.8875	0.970588	0.932203	0.962963	0.962963	1	0.917647	0.960784	0.941748	0.959459	0
Pancreas-Beta	0	0.919231	0.863333	0.0166667	0.0396476	0.0928571	0.924901	0.885057	0.900415	0.872792	0.976096	0.953975	0.919847	0.970149	0.979339	0.96633	0.983673	0.900763	0.966912	0.0135135
Pancreas-T2D-Beta	0.01	0.888889	0.765	0.04	0.0181818	0.0506329	0.896552	0.87037	0.890909	0.850575	0.985915	0.969231	0.895522	0.973684	0.947368	0.946237	0.971831	0.913978	0.9625	0
Pancreas-Delta	0.0566667	0.973684	0.773333	0.84	0.685185	0.928571	0.0987654	0.164384	0.341176	0.858696	0.977778	0.950617	0.948052	0.984848	0.952381	0.921875	0.9375	0.949367	0.962025	0
Pancreas-T2D-Delta	0.05	0.910714	0.825	0.83	0.657895	0.840909	0.175439	0.184211	0.325581	0.857143	0.980769	0.935484	0.934426	0.96	0.973684	0.933333	0.951613	0.967213	0.983607	0
Pancrea-Acinar	0.24	0.775194	0.9075	0.64	0.904348	0.951456	0.916084	0.887574	0.946429	0.0277778	0.0186047	0.0441176	0.025641	0.0655738	0.96875	0.960396	0.966887	0.930818	0.904459	0.00537634
Pancreas-Duct	0.035	0.958333	0.9375	0.8775	0.925532	0.954023	0.921053	0.932773	0.966942	0.757812	0.941176	0.944444	0.9375	0.94958	0.194444	0.366667	0.0769231	0.916667	0.97541	0.0153846
Pancreas-Endothel	0.176667	0.879121	0.906667	0.82	0.901961	0.911765	0.898148	0.941176	0.925926	0.891892	0.759036	0.886598	0.864198	0.930556	0.977273	0.922078	0.909091	0.259259	0.355769	0.534247
Pancreas-Islet-Endothel	0.22	0.911765	0.9	0.81	0.925926	0.916667	0.911111	0.972973	0.914286	0.921053	0.820513	0.947368	0.861111	0.973684	0.976744	0.974359	0.95	0.341463	0.302326	0.410256
Blood-B	0.173333	0.92517	0.933333	0.83	0.961905	0.929204	0.916084	0.968153	0.972067	0.924528	0.941606	0.934524	0.875776	0.96875	0.961326	0.96748	0.964706	0.975904	0.959732	0.113821
Blood-Granulocytes	0.113333	0.928	0.96	0.896667	0.956522	0.978495	0.969072	0.973684	0.981132	0.952381	0.982301	0.981481	0.964912	0.9	0.948276	0.990385	0.957746	0.973214	0.922414	0.0357143
Blood-Monocytes	0.12	0.926829	0.97	0.91	0.964912	0.955224	0.952381	0.971154	0.967033	0.924731	0.975904	0.978723	0.966667	0.802817	0.961165	0.984375	0.946237	0.967391	0.951807	0.0408163
Blood-NK	0.136667	0.897196	0.923333	0.863333	0.948276	0.986111	0.934066	0.978022	0.967742	0.918919	0.94186	0.950495	0.912621	0.989583	0.989474	0.986486	0.966102	0.978261	0.564356	0.09375
Blood-T-CD3	0.165	0.890244	0.91	0.865	0.978261	0.944444	0.867925	0.971429	0.985294	0.934211	0.947368	0.975	0.871429	0.972222	0.985075	0.942308	0.985507	0.967742	0.928571	0.134328
Blood-T-CD4	0.14	0.924528	0.883333	0.883333	0.970588	0.971014	0.920792	0.981132	0.972727	0.931298	0.941748	0.946237	0.893805	0.978495	0.982906	0.977528	0.97561	0.969697	0.951923	0.101695
Blood-T-CD8	0.18	0.902174	0.886667	0.86	0.962264	0.953846	0.86747	0.977011	0.979592	0.873874	0.908046	0.90566	0.841584	0.958333	0.978723	0.951456	0.941176	0.96875	0.886598	0.193878
Graph 1E
Donor ID	Age	BMI	Gender			Sample	Donor ID	CCDC73	PDX1-AS1	PELI2	Average	SD
H2207	58	23	Female			Islets_1	H2207	5.82668	5.38125	8.83889	6.68227	1.88091
HP2211	43	37	Female			Islets_2	HP2211	21.2694	16.0578	24.7933	20.7068	4.39483
HP19010	66	27.2	Male			Islets_3	HP19010	31.957	23.2091	31.6057	28.924	4.9523
SCICRC1888	58	36.6	Female			Islets_4	SCICRC1888	38.9501	22.2079	39.3113	33.4898	9.77205
H2297	56	26.6	Female			Islets_5	H2297	37.6478	26.8016	39.0771	34.5088	6.71285
H2351	61	39.5	Male		n=6	Sorted_Alpha	H2351	77.0961	67.0446	76.7034	73.6147	5.69327
H2330	49	27.2	Female			Sorted_Alpha	H2330	90.2765	65.768	89.6497	81.8981	13.9726
SCICRC1137	51	29.7	Female			Sorted_Alpha	SCICRC1137	85.2291	67.5802	87.0119	79.9404	10.7413
HP18334	52	26.9	Female			Sorted_Alpha	HP18334	88.0858	62.7506	89.5873	80.1412	15.0794
H2294	38	35.5	Male			Sorted_Alpha	H2294	90.3423	57.8283	89.6872	79.2859	18.5857
SCICRC1134	31	31.8	Male			Sorted_Alpha	SCICRC1134	92.3664	62.4158	86.2398	76.9953	15.8227
							Average All Alpha	87.2327	63.8979	86.4799	78.6459
							SD	5.52778	3.6691	5.01818	2.93038
HP18334	52	26.9	Female		n=4	Sorted_Beta	HP18334	3.98058	1.81885	4.03959	3.27967	1.26545
H2351	61	39.5	Male			Sorted_Beta	H2351	0.656752	0.0227894	2.65943	1.11299	1.37626
H2330	49	27.2	Female			Sorted_Beta	H2330	1.59727	0.0895564	1.78566	1.1575	0.929648
ICRH118	41	25	Female			Sorted_Beta	ICRH118	1.01904	0.344546	1.81281	1.0588	0.734938
							Average All Beta	1.81341	0.568936	2.57437	1.65224
							SD	1.4958	0.844733	1.05769	1.08571
H2351	61	39.5	Male		n=6	Sorted_Delta	H2351	0.694444	0.592593	1.14126	0.809433	0.29185
H2330	49	27.2	Female			Sorted_Delta	H2330	0	0	2.70239	0.900796	1.56022
H2207	58	23	Female			Sorted_Delta	H2207	0.237643	0.0295421	0.167896	0.145027	0.105918
HP2211	43	37	Female			Sorted_Delta	HP2211	0.00371195	0	2.88821	0.963974	1.66644
SCICRC1146	58	30	Female			Sorted_Delta	SCICRC1146	0.0162637	0.00661244	0.991201	0.338026	0.565687
H2294	38	35.5	Male			Sorted_Delta	H2294	0.948081	0.0347464	0.608575	0.530468	0.46165
							Average All Delta	0.316691	0.110582	1.41659	0.61462
							SD	0.408927	0.236609	1.12141	0.330454
H2332	55	26	Female		n=5	Sorted_Acinar	H2332	0.0234962	1.88482	0	0.636104	1.08148
H2214						Sorted_Acinar	H2214	3.17788	3.58083	4.77776	3.84549	0.832125
H2226	26	26.4	Female			Sorted_Acinar	H2226	0.0203749	0.0415685	0.0160224	0.0259886	0.013667
H2291	38	21.6	Female			Sorted_Acinar	H2291	0.00801507	4.2676	3.77321	2.68294	2.3297
H2220	23	24.9	Male			Sorted_Acinar	H2220	0.486231	0.955464	0.0179724	0.486556	0.468746
							Average All Acinar	0.7432	2.14605	1.71699	1.53542
							SD	1.37611	1.76594	2.36243	1.64625
H2352					n=5	Sorted_Duct	H2352	0	0	0	0	0
H2214						Sorted_Duct	H2214	0.67243	0	0	0.224143	0.388228
H2226	26	26.4	Female			Sorted_Duct	H2226	0.00264613	0.00774593	0.0103601	0.00691739	0.00392317
H2291	38	21.6	Female			Sorted_Duct	H2291	0.00990472	0.117949	0.0101128	0.045989	0.0623197
H2220	23	24.9	Male			Sorted_Duct	H2220	0.00378864	0.0994793	0.0180843	0.0404507	0.0516175
							Average All Duct	0.137754	0.0450349	0.00771143	0.0635001
							SD	0.298915	0.0585822	0.00773483	0.09203
H2360	21	19.6	Male		n=1	Sorted_Endothelial	H2360	0	0	0	0	0
Leukocytes DNA					n=1		Leukocytes DNA	0.0281136	0.687285	0	0.238466	0.388943
Graph 1F
Donor ID	Age	BMI	Gender			Sample	Donor ID	Insulin	FBXL19	DLG5	Average	SD
H2207	58	23	Female			Islets_1	H2207	24.9137	21.9337	19.5418	22.1297	2.6913
HP2211	43	37	Female			Islets_2	HP2211	31.6383	35.2181	28.8331	31.8965	3.20032
SCICRC1888	58	36.6	Female			Islets_3	SCICRC1888	35.1826	36.6615	29.7223	33.8555	3.65498
H2297	56	26.6	Female			Islets_4	H2297	38.2248	38.4535	31.7011	36.1265	3.8342
HP19010	66	27.2	Male			Islets_5	HP19010	38.6666	39.2629	36.0532	37.9943	1.70722
HP1827701	62	36.2	Male		n=6	Sorted_Beta	HP1827701	81.6361	82.0827	73.1908	78.9699
H2207	58	23	Female			Sorted_Beta	H2207	82.012	88.292	74.2666	81.5235
HP18334	52	26.9	Female			Sorted_Beta	HP18334	76.4741	73.8494	63.8821	71.4019
H2351	61	39.5	Male			Sorted_Beta	H2351	83.9765	85.505	78.404	82.6285
H2330	49	27.2	Female			Sorted_Beta	H2330	75.1818	80.6063	63.554	73.114
ICRH118	41	25	Female			Sorted_Beta	ICRH118	79.2334	84.2518	66.9352	76.8068
							Average All Beta	79.7523	82.4312	70.0388	77.4074
							SD	3.41772	4.9842	6.12169	4.50564
H2351	61	39.5	Male		n=8	Sorted_Alpha	H2351	0.7271	0.0361468	0	0.254416
H2330	49	27.2	Female			Sorted_Alpha	H2330	0.918267	0.167251	0.00254071	0.362686
H2207	58	23	Female			Sorted_Alpha	H2207	0.95339	0.0322615	0.757473	0.581042
H2211	43	37	Female			Sorted_Alpha	H2211	2.46112	1.87683	1.92052	2.08616
SCICRC1137	51	29.7	Female			Sorted_Alpha	SCICRC1137	0.0419903	1.60738	0	0.549789
HP18334	52	26.9	Female			Sorted_Alpha	HP18334	1.85849	1.2504	0.447038	1.18531
H2294	38	35.5	Male			Sorted_Alpha	H2294	1.69474	1.23588	0	0.976873
SCICRC1134	31	31.8	Male			Sorted_Alpha	SCICRC1134	1.4922	0.226355	0	0.572852
							Average All Alpha	1.26841	0.804063	0.390946	0.821141
							SD	0.757964	0.765924	0.680262	0.59539
H2351	61	39.5	Male		n=6	Sorted_Delta	H2351	0.0434405	0.14742	0.0190913	0.069984
H2330	49	27.2	Female			Sorted_Delta	H2330	0.561136	1.93784	0.0100776	0.836352
SCICRC1146	58	30	Female			Sorted_Delta	SCICRC1146	1.58094	1.72547	1.16434	1.49025
H2294	38	35.5	Male			Sorted_Delta	H2294	0	2.62794	0.134445	0.920795
H2207	58	23	Female			Sorted_Delta	H2207	0.0110181	2.74731	0.557006	1.10511
H2211	43	37	Female			Sorted_Delta	H2211	1.15189	3.75598	1.5263	2.14472
							Average All Delta	0.558072	2.15699	0.568543	1.09454
							SD	0.674457	1.21652	0.644148	0.693707
H2332	55	26	Female		n=4	Sorted_Acinar	H2332	0.460203	0.0446429	0.143403	0.216083
H2214						Sorted_Acinar	H2214	1.58611	0.243657	0.337625	0.722462
H2220	23	24.9	Male			Sorted_Acinar	H2220	0.0026639	0.00318036	0	0.00194808
H2226	26	26.4	Female			Sorted_Acinar	H2226	1.49847	0.0531965	0	0.517222
							Average All Acinar	0.886861	0.0861691	0.120257	0.364429
							SD	0.780353	0.10724	0.159904	0.318817
H2352					n=4	Sorted_Duct	H2352	0	0	0	0
H2214						Sorted_Duct	H2214	0.350263	0.531992	0	0.294085
H2220	23	24.9	Male			Sorted_Duct	H2220	0.0623721	0.00240425	0.006166	0.0236474
H2226	26	26.4	Female			Sorted_Duct	H2226	0	0	0.0123006	0.00410019
							Average All Duct	0.103159	0.133599	0.00461664	0.0804581
							SD	0.167339	0.265598	0.00588982	0.142791
H2360	21	19.6	Male		n=1	Sorted_Endothelial	H2360	0	0	0	0
Leukocytes DNA					n=1		Leukocytes DNA	0	0	0.00643252	0.00214417
Graph 1G
Alpha in non-Alpha (from the same donor)		Age	BMI	Gender
H2315 Donor	Non- Diabetic	51	29.8	Female
	CCDC73	PDX1-AS1	PELI2	Average	SD
0% alpha-cells	2.19392	3.54947	2.30909	2.68416	0.751588
10% alpha-cells	11.6549	8.93575	13.0951	11.2286	2.11219
20% alpha-cells	18.208	15.6599	17.0287	16.9655	1.27522
30% alpha-cells	27.7166	24.8894	25.2189	25.9416	1.54598
40% alpha-cells	28.8379	28.9597	28.7088	28.8355	0.125444
50% alpha-cells	44.4249	33.4505	47.9916	41.9557	7.57853
60% alpha-cells	55.6183	50.7236	56.4851	54.2756	3.10656
70% alpha-cells	64.7798	51.6219	59.106	58.5026	6.59966
100% alpha-cells	82.0447	69.473	86.9693	79.4957	9.02233
	linear Equation	R-squared value
CCDC73	y = 0.8294x + 2.2557	R² = 0.984
PDX1-AS1	y = 0.6857x + 2.9643	R² = 0.9819
PELI2	y = 0.8515x + 1.4819	R² = 0.9834
Graph 1H
Beta in non-Beta (from the same donor)		Age	BMI	Gender
ICRH122 Donor	Non- Diabetic	53	25.1	Male
	Insulin	FBXL19	DLG5	Average	SD
0% beta-cells	0.771484	0.925342	1.31092	1.00258	0.27789
10% beta-cells	10.2646	10.2195	6.61223	9.0321	2.09579
20% beta-cells	13.8423	14.6347	14.0052	14.1607	0.418468
30% beta-cells	23.5944	28.2051	16.2875	22.6957	6.00946
40% beta-cells	30.4564	30.9501	26.0346	29.147	2.70675
50% beta-cells	37.0253	43.3134	33.0244	37.7877	5.18667
60% beta-cells	42.5829	51.0274	40.978	44.8628	5.39869
70% beta-cells	54.4506	58.395	52.4789	55.1082	3.01235
100% beta-cells	76.3497	87.836	80.7462	81.644	5.79554
	linear Equation	R-squared value
Insulin	y = 0.7469x + 0.6137	R² = 0.9954
FBXL19	y = 0.859x - 0.1025	R² = 0.9941
DLG5	y = 0.7884x - 3.1223	R² = 0.9811
Graph 1I
DNA from sorted alpha (Donor H2315) into DNA from sorted duct (Donor H2342)		Age	BMI	Gender
H2315	Non- Diabetic	51	29.8	Female
H2342	Non- Diabetic	58	24.8	Male
	CCDC73	PDX1-AS1	PELI2	Average
0% alpha-cells	0.0318725	0.0157754	0.0621647	0.0366042
0.2% alpha-cells	0.354377	0.124013	0.241184	0.239858
0.4% alpha-cells	0.351937	0.20922	0.636172	0.39911
0.6% alpha-cells	0.648661	0.158395	0.618248	0.475101
0.8% alpha-cells	0.604683	0.351103	1.16466	0.706817
1% alpha-cells	1.10041	0.309444	0.991227	0.800361
1.2% alpha-cells	1.16285	0.317673	1.25344	0.911323
1.4% alpha-cells	1.57375	0.426886	1.58916	1.1966
1.6% alpha-cells	1.64726	0.637268	1.45456	1.24637
1.8% alpha-cells	2.56513	0.622152	2.3579	1.84839
2% alpha-cells	1.86613	0.596733	1.60559	1.35615
2.5% alpha-cells	2.43718	0.839273	2.71407	1.99684
3% alpha-cells	3.10255	1.45016	2.92031	2.49101
	linear Equation	R-squared value
CCDC73	y = 1.0327x + 0.0313	R² = 0.9409
PDX1-AS1	y = 0.3982x - 0.0393	R² = 0.8947
PELI2	y = 0.9585x + 0.138	R² = 0.9309
Graph 1J
DNA from sorted beta (ICRH122) into DNA from 293T		Age	BMI	Gender
ICRH122 Donor	Non- Diabetic	53	25.1	Male
	Insulin	FBXL19	DLG5	Average
0% beta-cells	0	0.0195312	0.0527188	0.0240833
0.2% beta-cells	0.265686	0.152579	0.259186	0.225817
0.4% beta-cells	0.37931	0.38284	0.190992	0.317714
0.6% beta-cells	0.577849	0.281624	0.430108	0.42986
0.8% beta-cells	0.494438	0.262525	0.610094	0.455685
1% beta-cells	1.03734	0.410747	1.12375	0.85728
1.2% beta-cells	1.22277	0.646766	0.306513	0.725348
1.4% beta-cells	1.87599	0.61674	0.377698	0.956811
1.6% beta-cells	1.8598	1.19972	1.33174	1.46375
1.8% beta-cells	1.57113	0.945962	1.72381	1.41363
2% beta-cells	1.84219	1.49309	1.57355	1.63627
2.5% beta-cells	2.51121	1.56703	1.81528	1.96451
3% beta-cells	2.3417	1.56135	3.07923	2.32743
	linear Equation	R-squared value
Insulin	y = 0.8846x + 0.1064	R² = 0.9096
FBXL19	y = 0.5886x - 0.0132	R² = 0.899
DLG5	y = 0.8973x - 0.1485	R² = 0.8305

## Sheet: Supplementary Figure 1
Graph S1A
Donor ID	Age (Years)	BMI	Gender		Sample	Donor ID	PTPRE	PRDM2	GRB10	FBXW12	SPATA21	Average
H2207	58	23	Female		Islets_1	H2207	23.2998	23.8673	19.97	20.5245	16.2485	20.782
HP19010	66	27.2	Male		Islets_2	HP19010	1.3745	0.958222	0.398984	0.523498	0.234342	0.69791
H2214				n=3	Sorted_Acinar	H2214	83.2406	89.3917	82.1063	90.5823	69.2382	82.9118
H2220	23	24.9	Male		Sorted_Acinar	H2220	89.2319	93.5987	77.6496	94.6439	72.0586	85.4365
H2226	26	26.4	Female		Sorted_Acinar	H2226	90.1199	85.8732	61.3978	97.8639	67.5946	80.5699
						Average All Acinar	87.5308	89.6212	73.7179	94.3634	69.6304	82.9728
						SD
SCICRC1137	51	29.7	Female	n=3	Sorted_Alpha	SCICRC1137	0.286832	0.618921	0	0	0	0.181151
SCICRC1134	31	31.8	Male		Sorted_Alpha	SCICRC1134	0.570988	0.196445	0.311265	0	0.10771	0.237282
HP18334	52	26.9	Female		Sorted_Alpha	HP18334	1.11515	0.126231	0.0539957	0.107953	0.0924428	0.299153
						Average All Alpha	0.657655	0.313866	0.121754	0.0359842	0.0667175	0.239195
						SD
ICRH118	41	25	Female	n=2	Sorted_Beta	ICRH118	1.13163	0.145391	0.157646	0.305723	0.0714158	0.362361
HP18334	52	26.9	Female		Sorted_Beta	HP18334	1.3987	0.837872	0.308642	1.00789	0.25	0.76062
						Average All Beta	1.26517	0.491631	0.233144	0.656805	0.160708	0.561491
						SD
H2207	58	23	Female	n=3	Sorted_Delta	H2207	0	0.138793	0.0764234	0.539291	0.530303	0.256962
H2211	43	37	Female		Sorted_Delta	HP2211	0.382377	0.52506	0	0	0.748194	0.331126
SCICRC1146	58	30	Female		Sorted_Delta	SCICRC1146	1.25896	0	0	0	0	0.251791
						Average All Delta	0.547111	0.221284	0.0254745	0.179764	0.426166	0.27996
						SD
H2220	23	24.9	Male	n=4	Sorted_Duct	H2220	1.91211	0.676946	0.276339	0.135455	0.119952	0.62416
H2214					Sorted_Duct	H2214	1.95175	1.30876	1.17716	0	1.17257	1.12205
H2226	26	26.4	Female		Sorted_Duct	H2226	1.14314	0.0387898	0.0152346	0	0	0.239433
H2291	38	21.6	Female		Sorted_Duct	H2291	2.44282	1.06245	0.445915	2.41166	1.66978	1.60652
						Average All Duct	1.86246	0.771736	0.478663	0.636779	0.740575	0.898042
						SD
H2360	21	19.6	Male	n=1	Sorted_Endothelial	H2360	0	1.42993	0	0	1.33615	0.553216
Leukocytes DNA				n=1		Leukocytes DNA	0	0	0	0	0	0
Graph S1B
Donor ID	Age	BMI	Gender		Sample	Donor ID	BZW2	COL27A1	HUNK	Average
IHP19010	66	27.2	Male		Islets_1	IHP19010	0.580913	0.986842	1.45406	1.00727
HP2297	56	26.6	Female		Islets_2	H2297	0.594658	1.33057	1.35547	1.09356
H2352				n=3	Sorted_Duct	H2352	36.3274	66.0446	41.4336	47.9352
H2342	58	24.8	Male		Sorted_Duct	H2342	43.4246	48.8112	57.9671	50.0676
H2363	29	20.8	Male		Sorted_Duct	H2363	55.3173	65.6106	27.706	49.5446
						Average All Duct	45.0231	60.1555	42.3689	49.1825
						SD	9.59531	9.82685	15.1522	1.11138
H2360	21	19.6	Male	n=3	Sorted_Acinar	H2360	5.51446	6.89408	9.34007	7.24954
H2332	55	26	Female		Sorted_Acinar	H2332	0.918728	2.14599	1.96914	1.67795
H2363	29	20.8	Male		Sorted_Acinar	H2363	0.540163	0.99025	0.192748	0.574387
						Average All Acinar	2.32445	3.34344	3.83399	3.16729
						SD	2.76911	3.12877	4.85043	3.57813
H2349	69	30.1	Female	n=3	Sorted_Alpha	H2349	0.829876	0	0	0.276625
H2330	49	27.2	Female		Sorted_Alpha	H2330	0	0	0	0
H2351	61	39.5	Male		Sorted_Alpha	H2351	0.206711	0	0.443987	0.2169
						Average All Alpha	0.345529	0	0.147996	0.164508
						SD	0.432002	0	0.256336	0.145564
H2349	69	30.1	Female	n=3	Sorted_Beta	H2349	0	0	1.60851	0.536169
H2348	55	24.3	Male		Sorted_Beta	H2348	3.47904	0.573599	2.407	2.15321
H2351	61	39.5	Male		Sorted_Beta	H2351	0	0	0.0502729	0.0167576
						Average All Beta	1.15968	0.1912	1.35526	0.902046
						SD	2.00862	0.331168	1.1986	1.11423
H2330	49	27.2	Female	n=3	Sorted_Delta	H2330	0	0	0	0
H2294	38	35.5	Male		Sorted_Delta	H2294	0.28838	0.38739	0.425852	0.367207
H2351	61	39.5	Male		Sorted_Delta	H2351	0.509507	0.482991	1.29337	0.761957
						Average All Delta	0.265962	0.290127	0.573075	0.376388
						SD	0.255492	0.255764	0.659135	0.381061
H2360	21	19.6	Male	n=1	Sorted_Endothelial	H2360	0	0	0	0
Leukocytes DNA				n=1		Leukocytes DNA	0	0.00311711	0	0.00103904
Graph S1C
Donor ID	Age	BMI	Gender		Sample	Donor ID	UBLCP1	RPGRIP1L	ZBTB7C	Average
HP19010	66	27.2	Male		Islets_1	HP19010	1.01253	3.92944	2.74705	2.563
HP2297	56	26.6	Female		Islets_2	H2297	4.32952	4.01436	3.52965	3.95784
H2330	49	27.2	Female	n=3	Sorted_Delta	H2330	32.5144	51.9367	52.7306	45.7272
H2294	38	35.5	Male		Sorted_Delta	H2294	24.0342	57.0534	32.554	37.8805
H2351	61	39.5	Male		Sorted_Delta	H2351	38.63	48.5033	56.653	47.9288
						Average All Delta	31.7262	52.4978	47.3125	43.8455
						SD	7.32975	4.30254	12.9308	5.2818
H2330	49	27.2	Female	n=2	Sorted_Alpha	H2330	0	0.00205984	0	0.000686613
H2351	61	39.5	Male		Sorted_Alpha	H2351	0	0	0	0
						Average All Alpha	0	0.00102992	0	0.000343306
						SD	0	0.00145653	0	0.000485509
H2349	69	30.1	Female	n=3	Sorted_Beta	H2349	0.497752	0.219424	0	0.239059
H2348	55	24.3	Male		Sorted_Beta	H2348	0	0.00131237	2.2983	0.766538
H2351	61	39.5	Male		Sorted_Beta	H2351	0.405654	0.265863	0.00269927	0.224739
						Average All Beta	0.301135	0.1622	0.767	0.410112
						SD	0.264825	0.141254	1.32615	0.308757
H2360	21	19.6	Male	n=3	Sorted_Acinar	H2360	0.0965384	0.595028	0.176138	0.289235
H2332	55	26	Female		Sorted_Acinar	H2332	0.114526	0.495911	0.183451	0.264629
H2363	29	20.8	Male		Sorted_Acinar	H2363	0	0.103466	0.0820641	0.0618434
						Average All Acinar	0.0703547	0.398135	0.147218	0.205236
						SD	0.0615891	0.259958	0.056543	0.124789
H2352				n=3	Sorted_Duct	H2352	0.0099295	0.0084317	0.00700918	0.0084568
H2342	58	24.8	Male		Sorted_Duct	H2342	0.025	0.0163817	0.038018	0.0264666
H2363	29	20.8	Male		Sorted_Duct	H2363	0	0	0.00363967	0.00121322
						Average All Duct	0.0116432	0.00827113	0.0162223	0.0120455
						SD	0.0125878	0.00819203	0.0189507	0.0130035
Endothelial H2360	21	19.6	Male		Sorted_Endothelial	H2360	0	0	0	0
Leukocytes						Leukocytes DNA	0	0	0	0
Graph S1D
Donor ID	Age	BMI	Gender		Sample	Donor ID	RB1	CMIP	ST5	Average	SD
SCICRC1888	58	36.6	Female		Islets_1	SCICRC1888	5.25245	2.8251	1.10725	3.0616	2.0827
HP2297	56	26.6	Female		Islets_2	H2297	9.11479	5.39933	3.57384	6.02932	2.82369
H2360	21	19.6	Male		Sorted_Endothelial	H2360	62.9342	17.2414	38.015	39.3968	22.8777
H2294	38	35.5	Male	n=2	Sorted_Alpha	H2294	0	0	0	0	0
H2351	61	39.5	Male		Sorted_Alpha	H2351	0	0	0	0	0
						Average All Alpha	0	0	0	0	0
						SD	0	0	0	0	0
H2330	49	27.2	Female	n=2	Sorted_Beta	H2330	0	0	0	0	0
H2351	61	39.5	Male		Sorted_Beta	H2351	0.304003	0	0	0.101334	0.175516
						Average All Beta	0.152001	0	0	0.0506671	0.087758
						SD	0.214962	0	0	0.0716541	0.124109
H2350				n=2	Sorted_Delta	H2350	0	0	0	0	0
H2294	38	35.5	Male		Sorted_Delta	H2294	0	0	0.118906	0.0396354	0.0686504
						Average All Delta	0	0	0.059453	0.0198177	0.0343252
						SD	0	0	0.0840793	0.0280264	0.0485432
H2220	23	24.9	Male	n=2	Sorted_Acinar	H2220	0	0	0	0	0
H2332	55	26	Female		Sorted_Acinar	H2332	0.351053	0.265152	0.115902	0.244035	0.118989
						Average All Acinar	0.175527	0.132576	0.0579509	0.122018	0.0594947
						SD	0.248232	0.18749	0.0819549	0.172559	0.0841382
H2291	38	21.6	Female	n=2	Sorted_Duct	H2291	0	0	0	0	0
H2342	58	24.8	Male		Sorted_Duct	H2342	0.070021	0	0	0.0233403	0.0404266
						Average All Duct	0.0350105	0	0	0.0116702	0.0202133
						SD	0.0495123	0	0	0.0165041	0.028586
Leukocytes DNA						Leukocytes DNA	0	0	0	0	0
Graph S1E
Donor ID	Age	BMI	Gender				Insulin	FBXL19	DLG5			Insulin	FBXL19	DLG5			Insulin	FBXL19	DLG5
							All T	All T	All T			All T - 1	All T - 1	All T - 1			All T - 2	All T - 2	All T - 2
SCICRC1888	58	36.6	Female	n=5	Islets	SCICRC1888	35.1826	36.6615	29.7223			6.0144	3.67936	6.40762			2.90473	3.00733	2.34227
H2297	56	26.6	Female		Islets	HP2297	38.2248	38.4535	31.7011			5.11834	3.03201	4.50622			3.70335	3.55068	2.21771
H2207	58	23	Female		Islets	H2207	24.9137	21.9337	19.5418			3.77251	2.89955	4.94512			1.35233	1.13577	1.95045
H2211	43	37	Female		Islets	HP2211	31.6383	35.2181	28.8331			4.64538	3.86548	4.69742			1.38469	2.29371	1.49675
HP19010	66	27.2	Male		Islets	HP19010	38.6666	39.2629	36.0532	Avearge of all markers	SD	7.05589	4.34566	6.19713	Avearge of all markers	SD	2.74619	2.41204	1.83619	Avearge of all markers	SD
						Average for islets	33.7252	34.3059	29.1703	32.4005	2.81244	5.3213	3.56441	5.3507	4.74547	1.02293	2.41826	2.47991	1.96867	2.28895	0.279073
						SD	5.67421	7.09273	6.06024			1.26353	0.599937	0.885713			1.02471	0.904256	0.332485
							Insulin	FBXL19	DLG5			Insulin	FBXL19	DLG5			Insulin	FBXL19	DLG5
							All T	All T	All T			All T - 1	All T - 1	All T - 1			All T - 2	All T - 2	All T - 2
H2351	61	39.5	Male	n=6	Sorted_Beta	H2351	83.9765	85.505	78.404			9.76509	10.1016	13.0239			1.47799	2.66231	2.67704
H2330	49	27.2	Female		Sorted_Beta	H2330	75.1818	80.6063	63.554			17.7613	14.7064	21.734			3.13691	2.62157	7.80542
HP1827701	62	36.2	Male		Sorted_Beta	HP1827701	81.6361	82.0827	73.1908			13.0295	8.95638	15.9044			1.50478	2.37414	3.5145
H2207	58	23	Female		Sorted_Beta	H2207	82.012	88.292	74.2666			12.8466	8.57363	18.2451			1.80438	1.38875	4.21108
ICRH118	41	25	Female		Sorted_Beta	ICRH118	79.2334	84.2518	66.9352			15.0249	10.7891	19.477			2.1633	2.08805	6.59634
HP18334	52	26.9	Female		Sorted_Beta	HP18334	76.4741	73.8494	63.8821	Avearge of all markers	SD	14.593	13.5	17.0786	Avearge of all markers	SD	2.13971	5.49398	8.24172	Avearge of all markers	SD
						Average for sorted beta	79.7523	82.4312	70.0388	77.4074	6.5205	13.8367	11.1045	17.5772	14.1728	3.24939	2.03784	2.77147	5.50768	3.439	1.8287
						SD	3.41772	4.9842	6.12169			2.66819	2.48342	3.00379			0.614193	1.41303	2.34973
							Insulin	FBXL19	DLG5			Insulin	FBXL19	DLG5			Insulin	FBXL19	DLG5
							All T	All T	All T			All T - 1	All T - 1	All T - 1			All T - 2	All T - 2	All T - 2
H2351	61	39.5	Male	n=8	Sorted_Alpha	H2351	0.7271	0.0361468	0			0.543626	1.68082	0.369857			3.86654	3.6689	0.00770535
H2330	49	27.2	Female		Sorted_Alpha	H2330	0.918267	0.167251	0.00254071			1.47363	0.803885	0			3.90521	5.19558	0.0101629
H2207	58	23	Female		Sorted_Alpha	H2207	0.95339	0.0322615	0.757473			1.55553	9.47414	0.710131			1.22658	2.98957	0.087921
H2211	43	37	Female		Sorted_Alpha	H2211	2.46112	1.87683	1.92052			4.64165	4.78983	0.445421			2.91711	6.20398	0.0520622
SCICRC1134	31	31.8	Male		Sorted_Alpha	SCICRC1134	1.4922	0.226355	0			1.20511	2.48322	0.0735128			4.59745	7.00734	0.0607853
SCICRC1137	51	29.7	Female		Sorted_Alpha	SCICRC1137	0.0419903	1.60738	0			0.629855	3.76812	0			4.66093	3.45191	0
HP18334	52	26.9	Female		Sorted_Alpha	HP18334	1.85849	1.2504	0.447038			1.32109	3.74314	0.310443			4.4335	9.4708	0.366323
H2294	38	35.5	Male		Sorted_Alpha	H2294	1.69474	1.23588	0	Avearge of all markers	SD	3.29815	3.17797	0.165524	Avearge of all markers	SD	6.69779	4.66102	0.0354694	Avearge of all markers	SD
						Av for all samples	1.26841	0.804063	0.390946	0.821141	0.438982	1.83358	3.74014	0.259361	1.94436	1.74303	4.03814	5.33114	0.0775537	3.14894	2.73734
						SD	0.757964	0.765924	0.680262			1.4146	2.63871	0.247995			1.56476	2.1697	0.120494
							Insulin	FBXL19	DLG5			Insulin	FBXL19	DLG5			Insulin	FBXL19	DLG5
							All T	All T	All T			All T - 1	All T - 1	All T - 1			All T - 2	All T - 2	All T - 2
H2351	61	39.5	Male	n=6	Sorted_Delta	H2351	0.0434405	0.14742	0.0190913			0.87967	0.0982801	0			0.499566	3.4398	0.0190913
H2330	49	27.2	Female		Sorted_Delta	H2330	0.561136	1.93784	0.0100776			0.83824	4.71664	0			1.10149	6.83729	0.0201552
H2211	43	37	Female		Sorted_Delta	H2211	1.15189	3.75598	1.5263			0.959588	3.97021	0.238807			0.242561	11.5374	0.0250757
SCICRC1146	58	30	Female		Sorted_Delta	SCICRC1146	1.58094	1.72547	1.16434			1.28583	7.01822	0.0665336			0.505902	8.06514	0
H2207	58	23	Female		Sorted_Delta	H2207	0.0110181	2.74731	0.557006			0.892464	2.50989	0.00870322			1.12384	7.62012	0.00870322
H2294	38	35.5	Male		Sorted_Delta	H2294	0	2.62794	0.134445	Avearge of all markers	SD	1.10373	0.242047	0	Avearge of all markers	SD	0.313558	4.52974	0	Avearge of all markers	SD
						Av for all samples	0.558072	2.15699	0.568543	1.09454	0.92013	0.993254	3.09255	0.0523406	1.37938	1.55645	0.631153	7.00491	0.0121709	2.54941	3.87097
						SD	0.674457	1.21652	0.821506			0.170898	2.69256	0.137538			0.386997	2.86043	0.0110244
							Insulin	FBXL19	DLG5			Insulin	FBXL19	DLG5			Insulin	FBXL19	DLG5
							All T	All T	All T			All T - 1	All T - 1	All T - 1			All T - 2	All T - 2	All T - 2
H2332	55	26	Female	n=4	Sorted_Acinar	H2332	0.460203	0.0446429	0.143403			1.29171	0	0			2.1755	0.0446429	0
H2220	23	24.9	Male		Sorted_Acinar	H2220	0.0026639	0.00318036	0			0.578327	0	0			0.622311	0.00318036	0
H2226	26	26.4	Female		Sorted_Acinar	H2226	1.49847	0.0531965	0			0.945983	0	0.00240234			1.78878	0.0235405	0.00240234
H2214					Sorted_Acinar	H2214	1.58611	0.243657	0.337625	Avearge of all markers	SD	0.725643	0.218451	0.00900333	Avearge of all markers	SD	1.8716	0.478911	0.00450167	Avearge of all markers	SD
						Av for all samples	0.886861	0.0861691	0.120257	0.364429	0.45276	0.885415	0.0546127	0.00285142	0.314293	0.495283	1.61455	0.137569	0.001726	0.584615	0.894533
						SD	0.780353	0.10724	0.159904			0.310145	0.109225	0.00425476			0.682066	0.22819	0.00216948
							Insulin	FBXL19	DLG5			Insulin	FBXL19	DLG5			Insulin	FBXL19	DLG5
							All T	All T	All T			All T - 1	All T - 1	All T - 1			All T - 2	All T - 2	All T - 2
H2220	23	24.9	Male	n=4	Sorted_Duct	H2220	0.0623721	0.00240425	0.006166			0.00154421	0	0			0.0589224	0	0
H2352					Sorted_Duct	H2352	0	0	0			0	0.017059	0			0	0	0
H2226	26	26.4	Female		Sorted_Duct	H2226	0	0	0.0123006			0	0	0			0	0	0
H2214					Sorted_Duct	H2214	0.350263	0.531992	0	Avearge of all markers	SD	0.0178705	0.0241815	0	Avearge of all markers	SD	0	0.507811	0	Avearge of all markers	SD
						Av for all samples	0.103159	0.133599	0.00329965	0.0800191	0.068162	0.00485369	0.0103101	0	0.0050546	0.005158	0.0147306	0.126953	0	0.0472277	0.0694355
						SD	0.167339	0.265598	0.0038265			0.00870838	0.0122551	0			0.0294612	0.253905	0
								All T	All T - 1	All T - 2
H2360	21	19.6	Male		Sorted_Endothelial	H2360	Insulin	0	0	0
							FBXL19	0	0	0
							DLG5	0	0	0
						Avearge of all markers		0	0	0
						SD		0	0	0
								All T	All T - 1	All T - 2
Leukocytes DNA						Leukocytes DNA	Insulin	0	0	0
							FBXL19	0	0	0
							DLG5	0.00643252	0	0
						Avearge of all markers		0.00214417	0	0
						SD		0.00371382	0	0
Graph S1F
Donor ID	Age	BMI	Gender	Duration of disease			Non-Diabetic/ T2D	Sample	Donor ID	CCDC73	PDX1-AS1	PELI2	Average	SD
H2351	61	39.5	Male			n=6	Non-Diabetic	Sorted_Alpha	H2351	77.0961	67.0446	76.7034	73.6147	5.69327
H2330	49	27.2	Female					Sorted_Alpha	H2330	90.2765	65.768	89.6497	81.8981	13.9726
SCICRC1137	51	29.7	Female					Sorted_Alpha	SCICRC1137	85.2291	67.5802	87.0119	79.9404	10.7413
HP18334	52	26.9	Female					Sorted_Alpha	HP18334	88.0858	62.7506	89.5873	80.1412	15.0794
H2294	38	35.5	Male					Sorted_Alpha	H2294	90.3423	57.8283	89.6872	79.2859	18.5857
SCICRC1134	31	31.8	Male					Sorted_Alpha	SCICRC1134	92.3664	62.4158	86.2398	76.9953	15.8227
ICRH121	54	33.1	Male	0-5 years		n=3	T2D	Sorted_Alpha	ICRH121	91.9509	53.3607	88.0811	77.7976	21.2512
SCICRC1142	50	35.4	Female	>10				Sorted_Alpha	SCICRC1142	91.0313	64.1071	87.0723	80.7369	14.5372
HP18275	30	40	Female	0-5 years				Sorted_Alpha	HP18275	82.2487	64.246	84.4346	76.9764	11.0789
HP18334	52	26.9	Female			n=4	Non-Diabetic	Sorted_Beta	HP18334	3.98058	1.81885	4.03959	3.27967	1.26545
H2351	61	39.5	Male					Sorted_Beta	H2351	0.656752	0.0227894	2.65943	1.11299	1.37626
H2330	49	27.2	Female					Sorted_Beta	H2330	1.59727	0.0895564	1.78566	1.1575	0.929648
ICRH118	41	25	Female					Sorted_Beta	ICRH118	1.01904	0.344546	1.81281	1.0588	0.734938
ICRH123	56	23.1	Female			n=4	T2D	Sorted_Beta	ICRH123	0.0157928	0.230662	0.178184	0.141546	0.112022
SCICRC1142	50	35.4	Female	>10				Sorted_Beta	SCICRC1142	2.25614	0.51395	10.0374	4.26916	5.07082
HP18275	30	40	Female	0-5 years				Sorted_Beta	HP18275	1.25673	0	1.45388	0.903539	0.788673
HP18320	61	27.3	Male	0-5 years				Sorted_Beta	HP18320	0.367918	0	3.64349	1.33714	2.00581
H2351	61	39.5	Male			n=6	Non-Diabetic	Sorted_Delta	H2351	0.694444	0.592593	1.14126	0.809433	0.29185
H2330	49	27.2	Female					Sorted_Delta	H2330	0	0	2.70239	0.900796	1.56022
H2207	58	23	Female					Sorted_Delta	H2207	0.237643	0.0295421	0.167896	0.145027	0.105918
HP2211	43	37	Female					Sorted_Delta	HP2211	0.00371195	0	2.88821	0.963974	1.66644
SCICRC1146	58	30	Female					Sorted_Delta	SCICRC1146	0.0162637	0.00661244	0.991201	0.338026	0.565687
H2294	38	35.5	Male					Sorted_Delta	H2294	0.948081	0.0347464	0.608575	0.530468	0.46165
ICRH121	54	33.1	Male	0-5 years		n=3	T2D	Sorted_Delta	ICRH121	1.52927	0.0988142	1.00634	0.878144	0.723796
HP18275	30	40	Female	0-5 years				Sorted_Delta	HP18275	1.29534	0	3.51171	1.60235	1.77587
HP18320	61	27.3	Male	0-5 years				Sorted_Delta	HP18320	0.0806452	0.490677	0.665115	0.412146	0.300044
Graph S1G
Donor ID	Age	BMI	Gender	Duration of disease			Non-Diabetic/ T2D	Sample	Donor ID	Insulin	FBXL19	DLG5	Average	SD
H2351	61	39.5	Male			n=8	Non-Diabetic	Sorted_Alpha	H2351	0.7271	0.0361468	0	0.254416	0.409755
H2330	49	27.2	Female					Sorted_Alpha	H2330	0.918267	0.167251	0.00254071	0.362686	0.488144
H2207	58	23	Female					Sorted_Alpha	H2207	0.95339	0.0322615	0.757473	0.581042	0.485248
H2211	43	37	Female					Sorted_Alpha	H2211	2.46112	1.87683	1.92052	2.08616	0.325464
SCICRC1137	51	29.7	Female					Sorted_Alpha	SCICRC1137	0.0419903	1.60738	0	0.549789	0.916139
HP18334	52	26.9	Female					Sorted_Alpha	HP18334	1.85849	1.2504	0.447038	1.18531	0.707972
H2294	38	35.5	Male					Sorted_Alpha	H2294	1.69474	1.23588	0	0.976873	0.876556
SCICRC1134	31	31.8	Male					Sorted_Alpha	SCICRC1134	1.4922	0.226355	0	0.572852	0.804183
ICRH121	54	33.1	Male	0-5 years		n=3	T2D	Sorted_Alpha	ICRH121	1.32682	0.700488	0.2229	0.750068	0.553625
SCICRC1142	50	35.4	Female	>10				Sorted_Alpha	SCICRC1142	1.36736	0.997187	0.40384	0.922794	0.486046
HP18275	30	40	Female	0-5 years				Sorted_Alpha	HP18275	0.390106	2.25612	0.00887075	0.885034	1.2026
HP1827701	62	36.2	Male			n=6	Non-Diabetic	Sorted_Beta	HP1827701	81.6361	82.0827	73.1908	78.9699	5.00983
H2207	58	23	Female					Sorted_Beta	H2207	82.012	88.292	74.2666	81.5235	7.02547
HP18334	52	26.9	Female					Sorted_Beta	HP18334	76.4741	73.8494	63.8821	71.4019	6.64325
H2351	61	39.5	Male					Sorted_Beta	H2351	83.9765	85.505	78.404	82.6285	3.73749
H2330	49	27.2	Female					Sorted_Beta	H2330	75.1818	80.6063	63.554	73.114	8.71216
ICRH118	41	25	Female					Sorted_Beta	ICRH118	79.2334	84.2518	66.9352	76.8068	8.90968
ICRH123	56	23.1	Female			n=5	T2D	Sorted_Beta	ICRH123	84.0383	87.5061	73.7907	81.7784	7.13149
ICRH121	54	33.1	Male	0-5 years				Sorted_Beta	ICRH121	89.693	92.9153	87.2271	89.9451	2.85248
SCICRC1142	50	35.4	Female	>10				Sorted_Beta	SCICRC1142	86.2074	89.8901	84.1113	86.7362	2.92549
HP18275	30	40	Female	0-5 years				Sorted_Beta	HP18275	73.2808	82.4355	76.3949	77.3704	4.65463
HP18320	61	27.3	Male	0-5 years				Sorted_Beta	HP18320	87.7591	87.3359	81.7509	85.6153	3.35336
H2351	61	39.5	Male			n=6	Non-Diabetic	Sorted_Delta	H2351	0.0434405	0.14742	0.0190913	0.069984	0.0681579
H2330	49	27.2	Female					Sorted_Delta	H2330	0.561136	1.93784	0.0100776	0.836352	0.992914
SCICRC1146	58	30	Female					Sorted_Delta	SCICRC1146	1.58094	1.72547	1.16434	1.49025	0.291355
H2294	38	35.5	Male					Sorted_Delta	H2294	0	2.62794	0.134445	0.920795	1.47996
H2207	58	23	Female					Sorted_Delta	H2207	0.0110181	2.74731	0.557006	1.10511	1.44815
H2211	43	37	Female					Sorted_Delta	H2211	1.15189	3.75598	1.5263	2.14472	1.40789
ICRH121	54	33.1	Male	0-5 years		n=3	T2D	Sorted_Delta	ICRH121	0.541294	0.8813	0.285425	0.56934	0.298926
HP18275	30	40	Female	0-5 years				Sorted_Delta	HP18275	7.72282	12.2724	6.39452	8.79659	3.08256
HP18320	61	27.3	Male	0-5 years				Sorted_Delta	HP18320	14.3554	17.9034	11.4649	14.5745	3.22484
Graph S1H
Acinar in non-acinar (from the same donor)		Age	BMI	Gender
H2480	Non- Diabetic	58	23.7	Female
	PTPRE	PRDM2	GRB10	FBXW12	SPATA21	Average	SD
0% Acinar-cells	3.35203	1.03612	1.94839	0.734803	0.849437	1.58416	1.09768
10% Acinar-cells	9.9022	9.65784	6.89655	6.13183	6.84806	7.8873	1.75627
20% Acinar-cells	14.7171	13.1225	14.7372	16.9245	11.8005	14.2604	1.92865
30% Acinar-cells	24.9113	25.4834	23.2292	26.6463	19.5493	23.9639	2.75817
40% Acinar-cells	30.6091	32.8704	29.6327	29.3701	27.7547	30.0474	1.88228
50% Acinar-cells	40.7027	44.326	36.0566	40.3375	34.9254	39.2696	3.80647
60% Acinar-cells	52.6852	48.6763	51.8152	57.152	43.5405	50.7738	5.0532
70% Acinar-cells	58.0805	64.7059	52.5521	63.8693	52.3086	58.3033	5.93792
100% Acinar-cells	87.4174	91.1701	79.2793	88.412	71.3036	83.5165	8.13741
	linear Equation	R-squared value
PTPRE	y = 0.8494x - 0.0425	R² = 0.9924
PRDM2	y = 0.9106x - 1.6629	R² = 0.9915
GRB10	y = 0.7869x - 0.3194	R² = 0.9905
FBXW12	y = 0.9071x - 1.6801	R² = 0.9892
SPATA21	y = 0.7289x - 0.9018	R² = 0.9964
Graph S1I
DNA from Duct into DNA from leukocytes		Age	BMI	Gender
H2342	Non- Diabetic	58	24.8	Male
	BZW2	COL27A1	HUNK	Average	SD
0% Duct-cells	0.110474	0.0187426	0.029623	0.0529464	0.0501161
0.5% Duct-cells	0.399931	0.345668	0.377929	0.374509	0.0272927
1% Duct-cells	0.619427	0.66658	0.543395	0.609801	0.062154
2% Duct-cells	1.02668	1.20763	1.20025	1.14485	0.102408
4% Duct-cells	2.2215	2.89959	2.72944	2.61684	0.352788
6% Duct-cells	3.38126	4.90094	4.54282	4.27501	0.79445
8% Duct-cells	4.23566	4.67681	4.6285	4.51366	0.241961
10% Duct-cells	4.82599	7.14864	6.21554	6.06339	1.16877
	linear Equation	R-squared value
BZW2	y = 0.4933x + 0.1602	R² = 0.9924
COL27A1	y = 0.6899x + 0.0167	R² = 0.9706
HUNK	y = 0.6242x + 0.0755	R² = 0.9795
Graph S1J
DNA from Delta into DNA from leukocytes		Age	BMI	Gender
H2471	Non- Diabetic	31	20.8	Male
	UBLCP1	RPGRIP1L	ZBTB7C	Average	SD
0% Delta-cells	0	0	0	0	0
1% Delta-cells	0.179389	0.812715	0.582485	0.524863	0.320571
3% Delta-cells	0.384551	2.34405	1.54802	1.42554	0.985476
5% Delta-cells	0.347556	4.29123	2.42304	2.35394	1.97275
7% Delta-cells	0.928117	5.98802	4.84673	3.92096	2.65395
9% Delta-cells	1.47657	6.50585	6.27591	4.75278	2.83961
	linear Equation	R-squared value
UBLCP1	y = 0.1486x - 0.0664	R² = 0.8897
RPGRIP1L	y = 0.7673x + 0.1265	R² = 0.982
ZBTB7C	y = 0.6976x - 0.2938	R² = 0.9696
Graph S1K
DNA from Endothelial into DNA from leukocytes		Age	BMI	Gender
H2446	Non- Diabetic	19	29.3	Female
	RB1	CMIP	ST5	Average	SD
0% Endothelial-cells	0.00411692	0	0.0913659	0.0318276	0.0516028
0.5% Endothelial-cells	0.344957	0.0353257	0.113744	0.164675	0.160976
1% Endothelial-cells	0.964134	0.439575	0.501558	0.635089	0.286642
2% Endothelial-cells	2.01774	0.267605	0.903934	1.06309	0.885857
4% Endothelial-cells	5.25187	1.33609	1.86323	2.81706	2.12501
6% Endothelial-cells	6.06173	1.50724	2.57077	3.37991	2.38262
8% Endothelial-cells	6.83776	1.81078	3.11412	3.92089	2.60879
10% Endothelial-cells	8.3327	2.1632	4.50208	4.99933	3.11466
15% Endothelial-cells	13.1778	3.70887	7.29738	8.06134	4.78045
20% Endothelial-cells	16.0648	4.37525	8.32328	9.58779	5.9465
	linear Equation	R-squared value
RB1	y = 0.8089x + 0.5267	R² = 0.9842
CMIP	y = 0.2243x + 0.0731	R² = 0.9813
ST5	y = 0.4366x + 0.025	R² = 0.9882

## Sheet: Figure 2
Graph 2B
Donor ID	Age (years)	Sex	BMI (Kg/m2)		n=6	Donor ID	% Beta-cells
HP19010	66	Male	27.2		Islets	HP19010	42.3327
ICRH118	41	Female	25			ICRH118	18.1818
SCICRC1888	58	Female	36.6			SCICRC1888	28.164
H2207	58	Female	23			H2207	22.7273
H2211	43	Female	37			H2211	35.1866
H2154						H2154	24.9405
					n=9
Sorted_ND_Beta					Sorted_ND_Beta	Donor ID	% Beta-cells
ICR118	41	Female	25			ICR118	80.967
H2294	38	Male	35.5			H2294	80.2469
H2207	58	Female	23			H2207	89.8397
SCICRC1146	58	Female	30			SCICRC1146	92.3729
H2211	43	Female	37			H2211	91.8699
HP18334	52	Female	26.9			HP18334	78.4119
ICRC1123						ICRC1123	73.9088
SCICRC1137	51	Female	29.7			SCICRC1137	90.2941
HP1827701	62	Male	36.2			HP1827701	91.8231
H2214						H2214	87.6103
					n=3
Sorted_T2D_Beta					Sorted_T2D_Beta	Donor ID	% Beta-cells
SCICRC1142	50	Female	35.4			SCICRC1142	95.6054
HP18275	30	Female	40			HP18275	90.8907
ICRH121	54	Male	33.1			ICRH121	97.9182
					n=1
					ENDOC	Donor ID	% Beta-cells
						ENDOC	76.6315
					n=8
Sorted_ND_Alpha					Sorted_ND_Alpha	Donor ID	% Beta-cells
H2294	38	Male	35.5			H2294	4.60821
SCICRC1146	58	Female	30			SCICRC1146	1.47495
HP2207	58	Female	23			HP2207	4.59194
HP2211	43	Female	37			HP2211	4.13141
ICRC1123						ICRC1123	5.27027
ICR118	41	Female	25			ICR118	7.22772
SCICRC1134	31	Male	31.8			SCICRC1134	3.36634
SCICRC1137	51	Female	29.7			SCICRC1137	2.72727
					n=6
Sorted_ND_Delta					Sorted_ND_Delta	Donor ID	% Beta-cells
ICRC1123						ICRC1123	0.72973
ICR118	41	Female	25			ICR118	0.364583
H2211	43	Female	37			H2211	1.5608
H2294	38	Male	35.5			H2294	2.41383
HP18334	52	Female	26.9			HP18334	3.77607
SCICRC1146	58	Female	30			SCICRC1146	1.35135
					n=4
Sorted_ND_Acinar					Sorted_ND_Acinar	Donor ID	% Beta-cells
H2220	23	Male	24.9			H2220	0.481408
H2226	26	Female	26.4			H2226	1.04945
H2291	38	Female	21.6			H2291	0
H2214						H2214	1.83333
					n=4
Sorted_ND_Duct					Sorted_ND_Duct	Donor ID	% Beta-cells
H2220	23	Male	24.9			H2220	0.116732
H2214						H2214	0
H2291	38	Female	21.6			H2291	0.37594
H2226	26	Female	26.4			H2226	0.337553
					n=1
					293T	Donor ID	% Beta-cells
						293T	1.57109
Graph 2C
Expected	% Expected	ddPCR (3 CpGs)	NGS	NGS (3 CpGs)
0	0	1.74459	1.00258	1.02857
10	10	8.93288	9.0321	12.4412
20	20	16.7317	14.1607	17.4462
30	30	20.3119	22.6957	27.1434
40	40	31.6453	29.147	34.8502
50	50	40.4709	37.7877	44.6578
60	60	48.6688	44.8628	51.6106
70	70	57.2617	55.1082	62.8292
100	100	84.3264	81.644	89.9879

## Sheet: Figure 3
Graph 3A
		Age (Years)	BMI (Kg/m2)	Gender						DNA content (ng/100 islets)
ND without Autoantibodies	HPAP004	24	32.2	Female			n=41	ND without Autoantibodies	HPAP004	561.6
	HPAP005	14	24.1	Female					HPAP005	443.733
	HPAP006	46	19.1	Male					HPAP006	409.067
	HPAP011	3	17.6	Male					HPAP011	422.933
	HPAP012	18	29.6	Female					HPAP012	416
	HPAP014	43	30.93	Female					HPAP014	651.733
	HPAP018	31	24.47	Male					HPAP018	762.667
	HPAP022	39	34.7	Female					HPAP022	426.4
	HPAP034	13	18.6	Male					HPAP034	161.2
	HPAP035	35	26.91	Male					HPAP035	663
	HPAP036	23	16	Female					HPAP036	626.6
	HPAP037	35	21.9	Female					HPAP037	293.8
	HPAP059	35	37.96	Male					HPAP059	414.267
	HPAP063	45	38.41	Female					HPAP063	165.533
	HPAP066	58	31.07	Female					HPAP066	814.667
	HPAP067	26	34.97	Male					HPAP067	862.333
	HPAP069	47	24.86	Female					HPAP069	95.3333
	HPAP074	40	36.88	Female					HPAP074	123.2
	HPAP075	35	27.52	Male					HPAP075	509.333
	HPAP080	22	35.71	Male					HPAP080	885.333
	HPAP082	25	23.96	Male					HPAP082	312
	HPAP095	23	34.32	Female					HPAP095	1045.33
	HPAP099	28	24.7	Female					HPAP099	386.667
	HPAP101	55	38.01	Female					HPAP101	669.333
	HPAP103	48	36.44	Female					HPAP103	685.333
	HPAP104	4	20.63	Male					HPAP104	405.333
	HPAP105	51	28.1	Female					HPAP105	608
	HPAP110	31	36.29	Male					HPAP110	177.6
	HPAP117	64	32.39	Male					HPAP117	354.667
	HPAP118	51	33.01	Female					HPAP118	594.667
	HPAP119	48	29.45	Female					HPAP119	469.333
	HPAP121	42	28.85	Male					HPAP121	554.667
	HPAP122	21	30.05	Female					HPAP122	376
	HPAP125	38	24.17	Male					HPAP125	173.333
	HPAP127	53	31	Male					HPAP127	216.267
	HPAP128	49	30.12	Male					HPAP128	464.533
	HPAP129	19	18.01	Female					HPAP129	97.6
	HPAP131	23	22.5	Male					HPAP131	50.9333
	HPAP132	5	15.71	Female					HPAP132	717.333
	HPAP139	22	26.52	Male					HPAP139	1261
	HPAP140	29	31.71	Female					HPAP140	345.333
		Age (Years)	BMI (Kg/m2)	Gender						DNA content (ng/100 islets)
ND with Autoantibodies	HPAP003	29	24.5	Male			n=13	ND with Autoantibodies	HPAP003	412.533
	HPAP008	24	31.9	Female					HPAP008	547.733
	HPAP009	3	14.9	Male					HPAP009	433.333
	HPAP016	30	25.21	Male					HPAP016	261.04
	HPAP017	30	23.7	Male					HPAP017	679.467
	HPAP019	22	29.8	Male					HPAP019	578.933
	HPAP024	18	24.3	Male					HPAP024	300.3
	HPAP029	23	28.6	Male					HPAP029	1352
	HPAP045	27	26.2	Female					HPAP045	462.8
	HPAP060	30	26.2	Male					HPAP060	428.133
	HPAP092	21	25.59	Male					HPAP092	762.667
	HPAP107	15	23.59	Male					HPAP107	992
	HPAP148	7	14.9	Male					HPAP148	2420
		Age (Years)	BMI (Kg/m2)	Gender	Duration of disease (Years)					DNA content (ng/100 islets)
T2D	HPAP001	47	32.2	Male	20		n=26	T2D	HPAP001	811.2
	HPAP010	42	36.8	Female	2				HPAP010	610.133
	HPAP013	28	41.6	Female	5				HPAP013	821.6
	HPAP061	59	38.27	Female	Unknown				HPAP061	700.267
	HPAP062	56	26.48	Male	4_5				HPAP062	1560
	HPAP065	40	37.47	Male	3				HPAP065	596.267
	HPAP070	55	17.09	Male	16				HPAP070	2903.33
	HPAP079	52	28.38	Female	10				HPAP079	600
	HPAP081	45	28.91	Female	20				HPAP081	166.933
	HPAP083	45	35.62	Male	2-3 years				HPAP083	216.267
	HPAP085	48	39.78	Female	6-10 years				HPAP085	157.6
	HPAP088	37	32.81	Male	10 days				HPAP088	501.333
	HPAP090	59	32.23	Female	4				HPAP090	746.667
	HPAP091	50	35.58	Female	3 months				HPAP091	250.933
	HPAP096	56	38.7	Female	1				HPAP096	400
	HPAP100	41	28.83	Male	7-8 years				HPAP100	666.667
	HPAP106	55	28.12	Male	3 years				HPAP106	738.667
	HPAP108	42	33	Male	NA				HPAP108	1045.33
	HPAP109	59	29.49	Female	<5 years				HPAP109	770.667
	HPAP115	46	28.72	Male	5-6 years				HPAP115	517.333
	HPAP120	63	29.6	Female	2-3 years				HPAP120	760
	HPAP124	47	30.96	Male	10 years				HPAP124	349.333
	HPAP126	50	31.01	Female	1 month				HPAP126	888
	HPAP133	49	25.42	Female	NA				HPAP133	442.667
	HPAP142	43	23.48	Male	0-5 years				HPAP142	171.6
	HPAP144	61	32.56	Male	6 months				HPAP144	1893.33
		Age (Years)	BMI (Kg/m2)	Gender	Duration of disease (Years)					DNA content (ng/100 islets)
T1D	HPAP002	26	16.4	Male	5		n=10	T1D	HPAP002	196.213
	HPAP015	29	22.03	Male	7				HPAP015	592.8
	HPAP020	14	13.2	Male					HPAP020	405.6
	HPAP071	12	15.42	Female	3				HPAP071	472
	HPAP084	12	18.5	Female	NA				HPAP084	656
	HPAP087	15	19.3	Female	6-10 years				HPAP087	813.333
	HPAP102	18	20.65	Male	6 years				HPAP102	185.333
	HPAP113	9	15.92	Male	recent DKA				HPAP113	1176
	HPAP123	25	21.35	Male	3 years				HPAP123	328
	HPAP138	35	23.63	Female	8 years				HPAP138	180.7
Graph 3B
	ND without Autoantibodies	Age (Years)	BMI (Kg/m2)	Gender			ND without Autoantibodies
n=41	Donor ID					n=41	Donor ID	Insulin content ng/100 islets
	HPAP004	24	32.2	Female			HPAP004	3040
	HPAP005	14	24.1	Female			HPAP005	3520
	HPAP006	46	19.1	Male			HPAP006	2618
	HPAP011	3	17.6	Male			HPAP011	1006
	HPAP012	18	29.6	Female			HPAP012	860
	HPAP014	43	30.93	Female			HPAP014	4027
	HPAP018	31	24.47	Male			HPAP018	610
	HPAP022	39	34.7	Female			HPAP022	5090
	HPAP034	13	18.6	Male			HPAP034	1094
	HPAP035	35	26.91	Male			HPAP035	1628
	HPAP036	23	16	Female			HPAP036	1646
	HPAP042	1	17.9	Male			HPAP042	139
	HPAP056	33	32.89	Male			HPAP056	106
	HPAP059	35	37.96	Male			HPAP059	1310
	HPAP063	45	38.41	Female			HPAP063	1659
	HPAP066	58	31.07	Female			HPAP066	3680
	HPAP067	26	34.97	Male			HPAP067	3480
	HPAP069	47	24.86	Female			HPAP069	2840
	HPAP074	40	36.88	Female			HPAP074	2548
	HPAP075	35	27.52	Male			HPAP075	5020
	HPAP082	25	23.96	Male			HPAP082	409
	HPAP095	23	34.32	Female			HPAP095	3034
	HPAP099	28	24.7	Female			HPAP099	1790
	HPAP101	55	38.01	Female			HPAP101	5790
	HPAP103	48	36.44	Female			HPAP103	3560
	HPAP104	4	20.63	Male			HPAP104	4090
	HPAP105	51	28.1	Female			HPAP105	4550
	HPAP110	31	36.29	Male			HPAP110	4319
	HPAP117	64	32.39	Male			HPAP117	2370
	HPAP118	51	33.01	Female			HPAP118	2380
	HPAP119	48	29.45	Female			HPAP119	2850
	HPAP121	42	28.85	Male			HPAP121	2687
	HPAP122	21	30.05	Female			HPAP122	2440
	HPAP125	38	24.17	Male			HPAP125	403
	HPAP127	53	31	Male			HPAP127	3740
	HPAP128	49	30.12	Male			HPAP128	360
	HPAP129	19	18.01	Female			HPAP129	4680
	HPAP131	23	22.5	Male			HPAP131	4150
	HPAP132	5	15.71	Female			HPAP132	3370
	HPAP139	22	26.52	Male			HPAP139	16150
	HPAP140	29	31.71	Female			HPAP140	8530
	ND with Aab+						ND with Aab+
n=12	Donor ID	Age (Years)	BMI (Kg/m2)	Gender		n=12	Donor ID	Insulin content ng/100 islets
	HPAP003	29	24.5	Male			HPAP003	2210
	HPAP008	24	31.9	Female			HPAP008	2140
	HPAP009	3	14.9	Male			HPAP009	1319
	HPAP016	30	25.21	Male			HPAP016	31.2
	HPAP017	30	23.7	Male			HPAP017	3160
	HPAP019	22	29.8	Male			HPAP019	3805
	HPAP024	18	24.3	Male			HPAP024	1389
	HPAP029	23	28.6	Male			HPAP029	3646
	HPAP060	30	26.2	Male			HPAP060	486
	HPAP092	21	25.59	Male			HPAP092	97
	HPAP107	15	23.59	Male			HPAP107	830
	HPAP148	7	14.9	Male			HPAP148	1350
	T2D						T2D
n=25	Donor ID	Age (Years)	BMI (Kg/m2)	Gender	Duration of disease (Years)	n=25	Donor ID	Insulin content ng/100 islets
	HPAP001	47	32.2	Male	20		HPAP001	284
	HPAP010	42	36.8	Female	2		HPAP010	3680
	HPAP013	28	41.6	Female	5		HPAP013	1576
	HPAP061	59	38.27	Female	Unknown		HPAP061	1610
	HPAP062	56	26.48	Male	4_5		HPAP062	490
	HPAP065	40	37.47	Male	3		HPAP065	548
	HPAP070	55	17.09	Male	16		HPAP070	215
	HPAP079	52	28.38	Female	10		HPAP079	1305
	HPAP081	45	28.91	Female	20		HPAP081	1916
	HPAP083	45	35.62	Male	2-3 years		HPAP083	1111
	HPAP085	48	39.78	Female	6-10 years		HPAP085	2729
	HPAP088	37	32.81	Male	10 days		HPAP088	729
	HPAP090	59	32.23	Female	4		HPAP090	4980
	HPAP091	50	35.58	Female	3 months		HPAP091	2190
	HPAP096	56	38.7	Female	1		HPAP096	2730
	HPAP100	41	28.83	Male	7-8 years		HPAP100	650
	HPAP106	55	28.12	Male	3 years		HPAP106	2080
	HPAP108	42	33	Male	NA		HPAP108	659
	HPAP109	59	29.49	Female	<5 years		HPAP109	2290
	HPAP115	46	28.72	Male	5-6 years		HPAP115	1150
	HPAP120	63	29.6	Female	2-3 years		HPAP120	1160
	HPAP124	47	30.96	Male	10 years		HPAP124	1680
	HPAP126	50	31.01	Female	1 month		HPAP126	6850
	HPAP133	49	25.42	Female	NA		HPAP133	3350
	HPAP142	43	23.48	Male	0-5 years		HPAP142	5708
	T1D						T1D
n=9	Donor ID	Age (Years)	BMI (Kg/m2)	Gender	Duration of disease (Years)	n=9	Donor ID	Insulin content ng/100 islets
	HPAP002	26	16.4	Male	5		HPAP002	16
	HPAP015	29	22.03	Male	7		HPAP015	39
	HPAP020	14	13.2	Male			HPAP020	23
	HPAP071	12	15.42	Female	3		HPAP071	115
	HPAP084	12	18.5	Female	NA		HPAP084	964
	HPAP102	18	20.65	Male	6 years		HPAP102	14
	HPAP113	9	15.92	Male	recent DKA		HPAP113	262
	HPAP123	25	21.35	Male	3 years		HPAP123	219
	HPAP138	35	23.63	Female	8 years		HPAP138	6770
Graph 3C
	ND without Autoantibodies	Age (Years)	BMI (Kg/m2)	Gender				ND without Aab+
n=41	Donor ID						n=41	Donor ID	Insulin content ng/100 islets	Beta fraction for normalization	Insulin content/ beta-cells in 100 islets
	HPAP004	24	32.2	Female				HPAP004	3040	0.377563	8051.63
	HPAP005	14	24.1	Female				HPAP005	3520	0.227013	15505.7
	HPAP006	46	19.1	Male				HPAP006	2618	0.164688	15896.7
	HPAP011	3	17.6	Male				HPAP011	1006	0.0991559	10145.6
	HPAP012	18	29.6	Female				HPAP012	860	0.364531	2359.2
	HPAP014	43	30.93	Female				HPAP014	4027	0.587072	6859.46
	HPAP018	31	24.47	Male				HPAP018	610	0.363236	1679.35
	HPAP022	39	34.7	Female				HPAP022	5090	0.425898	11951.2
	HPAP034	13	18.6	Male				HPAP034	1094	0.170889	6401.83
	HPAP035	35	26.91	Male				HPAP035	1628	0.318441	5112.4
	HPAP036	23	16	Female				HPAP036	1646	0.34521	4768.11
	HPAP042	1	17.9	Male				HPAP042	139	0.0265201	5241.31
	HPAP056	33	32.89	Male				HPAP056	106	0.249632	424.625
	HPAP059	35	37.96	Male				HPAP059	1310	0.187237	6996.49
	HPAP063	45	38.41	Female				HPAP063	1659	0.329791	5030.46
	HPAP066	58	31.07	Female				HPAP066	3680	0.217188	16943.9
	HPAP067	26	34.97	Male				HPAP067	3480	0.240805	14451.5
	HPAP069	47	24.86	Female				HPAP069	2840	0.120481	23572.2
	HPAP074	40	36.88	Female				HPAP074	2548	0.505348	5042.07
	HPAP075	35	27.52	Male				HPAP075	5020	0.496213	10116.6
	HPAP082	25	23.96	Male				HPAP082	409	0.184295	2219.27
	HPAP095	23	34.32	Female				HPAP095	3034	0.259003	11714.1
	HPAP099	28	24.7	Female				HPAP099	1790	0.23029	7772.82
	HPAP101	55	38.01	Female				HPAP101	5790	0.579818	9985.89
	HPAP103	48	36.44	Female				HPAP103	3560	0.449021	7928.36
	HPAP104	4	20.63	Male				HPAP104	4090	0.258031	15850.8
	HPAP105	51	28.1	Female				HPAP105	4550	0.579147	7856.38
	HPAP110	31	36.29	Male				HPAP110	4319	0.594714	7262.31
	HPAP117	64	32.39	Male				HPAP117	2370	0.40538	5846.37
	HPAP118	51	33.01	Female				HPAP118	2380	0.443611	5365.06
	HPAP119	48	29.45	Female				HPAP119	2850	0.352385	8087.75
	HPAP121	42	28.85	Male				HPAP121	2687	0.660978	4065.19
	HPAP122	21	30.05	Female				HPAP122	2440	0.506323	4819.06
	HPAP125	38	24.17	Male				HPAP125	403	0.0604687	6664.6
	HPAP127	53	31	Male				HPAP127	3740	0.346828	10783.5
	HPAP128	49	30.12	Male				HPAP128	360	0.265977	1353.5
	HPAP129	19	18.01	Female				HPAP129	4680	0.349864	13376.6
	HPAP131	23	22.5	Male				HPAP131	4150	0.273253	15187.4
	HPAP132	5	15.71	Female				HPAP132	3370	0.226829	14857
	HPAP139	22	26.52	Male				HPAP139	16150	0.266034	60706.6
	HPAP140	29	31.71	Female				HPAP140	8530	0.24431	34914.7
	ND with Aab+							ND with Aab+
n=12	Donor ID	Age (Years)	BMI (Kg/m2)	Gender			n=12	Donor ID	Insulin content ng/100 islets	Beta fraction for normalization	Insulin content/ beta-cells in 100 islets
	HPAP003	29	24.5	Male				HPAP003	2210	0.401898	5498.9
	HPAP008	24	31.9	Female				HPAP008	2140	0.365372	5857.04
	HPAP009	3	14.9	Male				HPAP009	1319	0.26081	5057.33
	HPAP016	30	25.21	Male				HPAP016	31.2	0.0726978	429.174
	HPAP017	30	23.7	Male				HPAP017	3160	0.3668	8615.04
	HPAP019	22	29.8	Male				HPAP019	3805	0.413803	9195.2
	HPAP024	18	24.3	Male				HPAP024	1389	0.299957	4630.66
	HPAP029	23	28.6	Male				HPAP029	3646	0.350707	10396.1
	HPAP060	30	26.2	Male				HPAP060	486	0.0590727	8227.16
	HPAP092	21	25.59	Male				HPAP092	97	0.037146	2611.31
	HPAP107	15	23.59	Male				HPAP107	830	0.228823	3627.26
	HPAP148	7	14.9	Male				HPAP148	1350	0.30376	4444.3
	T2D							T2D
n=25	Donor ID	Age (Years)	BMI (Kg/m2)	Gender	Duration of disease (Years)		n=25	Donor ID	Insulin content ng/100 islets	Beta fraction for normalization	Insulin content/ beta-cells in 100 islets
	HPAP001	47	32.2	Male	20			HPAP001	284	0.170932	1661.48
	HPAP010	42	36.8	Female	2			HPAP010	3680	0.354272	10387.5
	HPAP013	28	41.6	Female	5			HPAP013	1576	0.478953	3290.51
	HPAP061	59	38.27	Female	Unknown			HPAP061	1610	0.182197	8836.6
	HPAP062	56	26.48	Male	4_5			HPAP062	490	0.127772	3834.97
	HPAP065	40	37.47	Male	3			HPAP065	548	0.117197	4675.88
	HPAP070	55	17.09	Male	16			HPAP070	215	0.0635232	3384.59
	HPAP079	52	28.38	Female	10			HPAP079	1305	0.325006	4015.31
	HPAP081	45	28.91	Female	20			HPAP081	1916	0.299787	6391.21
	HPAP083	45	35.62	Male	2-3 years			HPAP083	1111	0.121286	9160.14
	HPAP085	48	39.78	Female	6-10 years			HPAP085	2729	0.540156	5052.24
	HPAP088	37	32.81	Male	10 days			HPAP088	729	0.159505	4570.4
	HPAP090	59	32.23	Female	4			HPAP090	4980	0.506454	9833.08
	HPAP091	50	35.58	Female	3 months			HPAP091	2190	0.233334	9385.69
	HPAP096	56	38.7	Female	1			HPAP096	2730	0.412168	6623.51
	HPAP100	41	28.83	Male	7-8 years			HPAP100	650	0.0754884	8610.59
	HPAP106	55	28.12	Male	3 years			HPAP106	2080	0.272006	7646.88
	HPAP108	42	33	Male	NA			HPAP108	659	0.103961	6338.9
	HPAP109	59	29.49	Female	<5 years			HPAP109	2290	0.347939	6581.62
	HPAP115	46	28.72	Male	5-6 years			HPAP115	1150	0.13787	8341.2
	HPAP120	63	29.6	Female	2-3 years			HPAP120	1160	0.294797	3934.91
	HPAP124	47	30.96	Male	10 years			HPAP124	1680	0.611351	2748.01
	HPAP126	50	31.01	Female	1 month			HPAP126	6850	0.487571	14049.2
	HPAP133	49	25.42	Female	NA			HPAP133	3350	0.33066	10131.2
	HPAP142	43	23.48	Male	0-5 years			HPAP142	5708	0.238146	23968.5
	T1D							T1D
n=9	Donor ID	Age (Years)	BMI (Kg/m2)	Gender	Duration of disease (Years)		n=9	Donor ID	Insulin content ng/100 islets	Beta fraction for normalization	Insulin content/ beta-cells in 100 islets
	HPAP002	26	16.4	Male	5			HPAP002	16	0.0098659	1621.75
	HPAP015	29	22.03	Male	7			HPAP015	39	0.00405429	9619.45
	HPAP020	14	13.2	Male				HPAP020	23	0.0373076	616.496
	HPAP071	12	15.42	Female	3			HPAP071	115	0.027576	4170.29
	HPAP084	12	18.5	Female	NA			HPAP084	964	0.337886	2853.03
	HPAP102	18	20.65	Male	6 years			HPAP102	14	0.00820858	1705.53
	HPAP113	9	15.92	Male	recent DKA			HPAP113	262	0.189678	1381.29
	HPAP123	25	21.35	Male	3 years			HPAP123	219	0.0945468	2316.31
	HPAP138	35	23.63	Female	8 years			HPAP138	6770	0.17925	37768.6
Graph 3D
	ND without Aab+							ND without Aab+
n=45	Donor ID	Age (Years)	BMI (Kg/m2)	Gender			n=45	Donor ID	Glucagon content (pg/islets)
	HPAP004	24	32.2	Female				HPAP004	505000
	HPAP005	14	24.1	Female				HPAP005	68000
	HPAP006	46	19.1	Male				HPAP006	24700
	HPAP011	3	17.6	Male				HPAP011	33900
	HPAP012	18	29.6	Female				HPAP012	68000
	HPAP014	43	30.93	Female				HPAP014	150000
	HPAP018	31	24.47	Male				HPAP018	76000
	HPAP022	39	34.7	Female				HPAP022	254000
	HPAP034	13	18.6	Male				HPAP034	6900
	HPAP035	35	26.91	Male				HPAP035	88800
	HPAP036	23	16	Female				HPAP036	68400
	HPAP037	35	21.9	Female				HPAP037	6600
	HPAP042	1	17.9	Male				HPAP042	6000
	HPAP056	33	32.89	Male				HPAP056	118800
	HPAP059	35	37.96	Male				HPAP059	32400
	HPAP063	45	38.41	Female				HPAP063	52800
	HPAP066	58	31.07	Female				HPAP066	33600
	HPAP067	26	34.97	Male				HPAP067	147600
	HPAP069	47	24.86	Female				HPAP069	272000
	HPAP074	40	36.88	Female				HPAP074	169800
	HPAP075	35	27.52	Male				HPAP075	231000
	HPAP077	47	32.78	Male				HPAP077	260000
	HPAP080	22	35.71	Male				HPAP080	142800
	HPAP082	25	23.96	Male				HPAP082	16800
	HPAP095	23	34.32	Female				HPAP095	1328000
	HPAP099	28	24.7	Female				HPAP099	978000
	HPAP101	55	38.01	Female				HPAP101	299000
	HPAP103	48	36.44	Female				HPAP103	395000
	HPAP104	4	20.63	Male				HPAP104	355000
	HPAP105	51	28.1	Female				HPAP105	306000
	HPAP110	31	36.29	Male				HPAP110	118400
	HPAP116	41	31.63	Female				HPAP116	668000
	HPAP117	64	32.39	Male				HPAP117	112500
	HPAP118	51	33.01	Female				HPAP118	100500
	HPAP119	48	29.45	Female				HPAP119	301500
	HPAP121	42	28.85	Male				HPAP121	82000
	HPAP122	21	30.05	Female				HPAP122	76000
	HPAP125	38	24.17	Male				HPAP125	94000
	HPAP127	53	31	Male				HPAP127	57000
	HPAP128	49	30.12	Male				HPAP128	10000
	HPAP129	19	18.01	Female				HPAP129	14400
	HPAP131	23	22.5	Male				HPAP131	63000
	HPAP132	5	15.71	Female				HPAP132	25000
	HPAP139	22	26.52	Male				HPAP139	354000
	HPAP140	29	31.71	Female				HPAP140	258000
	ND with Aab+							ND with Aab+
n=13	Donor ID	Age (Years)	BMI (Kg/m2)	Gender			n=12	Donor ID	Glucagon content (pg/islets)
	HPAP003	29	24.5	Male				HPAP003	102000
	HPAP008	24	31.9	Female				HPAP008	64000
	HPAP009	3	14.9	Male				HPAP009	36100
	HPAP016	30	25.21	Male				HPAP016	40000
	HPAP017	30	23.7	Male				HPAP017	282000
	HPAP019	22	29.8	Male				HPAP019	128000
	HPAP045	27	26.2	Female				HPAP045	178800
	HPAP060	30	26.2	Male				HPAP060	71100
	HPAP072	19	23.1	Male				HPAP072	213000
	HPAP092	21	25.59	Male				HPAP092	2160
	HPAP107	15	23.59	Male				HPAP107	78000
	HPAP114	21	25.66	Female				HPAP114	318000
	HPAP148	7	14.9	Male				HPAP148	92000
	T2D							T2D
n=27	Donor ID	Age (Years)	BMI (Kg/m2)	Gender	Duration of disease (Years)		n=27	Donor ID	Glucagon content (pg/islets)
	HPAP001	47	32.2	Male	20			HPAP001	20100
	HPAP010	42	36.8	Female	2			HPAP010	228000
	HPAP013	28	41.6	Female	5			HPAP013	196000
	HPAP061	59	38.27	Female	Unknown			HPAP061	123600
	HPAP062	56	26.48	Male	4_5			HPAP062	45600
	HPAP065	40	37.47	Male	3			HPAP065	138000
	HPAP070	55	17.09	Male	16			HPAP070	24
	HPAP079	52	28.38	Female	10			HPAP079	290400
	HPAP081	45	28.91	Female	20			HPAP081	217600
	HPAP083	45	35.62	Male	2-3 years			HPAP083	188400
	HPAP085	48	39.78	Female	6-10 years			HPAP085	75600
	HPAP088	37	32.81	Male	10 days			HPAP088	17400
	HPAP090	59	32.23	Female	4			HPAP090	296000
	HPAP091	50	35.58	Female	3 months			HPAP091	96900
	HPAP096	56	38.7	Female	1			HPAP096	304000
	HPAP100	41	28.83	Male	7-8 years			HPAP100	124800
	HPAP106	55	28.12	Male	3 years			HPAP106	559500
	HPAP108	42	33	Male	NA			HPAP108	50000
	HPAP109	59	29.49	Female	<5 years			HPAP109	292000
	HPAP111	63	24.25	Male	NA			HPAP111	245600
	HPAP115	46	28.72	Male	5-6 years			HPAP115	91500
	HPAP120	63	29.6	Female	2-3 years			HPAP120	214000
	HPAP124	47	30.96	Male	10 years			HPAP124	70000
	HPAP126	50	31.01	Female	1 month			HPAP126	144000
	HPAP133	49	25.42	Female	NA			HPAP133	39000
	HPAP142	43	23.48	Male	0-5 years			HPAP142	530000
	HPAP144	61	32.56	Male	6 months			HPAP144	45000
	T1D							T1D
n=9	Donor ID	Age (Years)	BMI (Kg/m2)	Gender	Duration of disease (Years)		n=9	Donor ID	Glucagon content (pg/islets)
	HPAP002	26	16.4	Male	5			HPAP002	13500
	HPAP020	14	13.2	Male				HPAP020	14500
	HPAP071	12	15.42	Female	3			HPAP071	97200
	HPAP084	12	18.5	Female	NA			HPAP084	202800
	HPAP087	15	19.3	Female	6-10 years			HPAP087	10400
	HPAP102	18	20.65	Male	6 years			HPAP102	5600
	HPAP113	9	15.92	Male	recent DKA			HPAP113	376800
	HPAP123	25	21.35	Male	3 years			HPAP123	70000
	HPAP138	35	23.63	Female	8 years			HPAP138	906000
Graph 3E
	ND without Aab+						ND without Aab+
n=45	Donor ID	Age (Years)	BMI (Kg/m2)	Gender		n=45	Donor ID	Glucagon content (pg/100islets)	Alpha for normalization	GCG content/ alpha cells in 100islets
	HPAP004	24	32.2	Female			HPAP004	505000	0.328398	1.53777e+06
	HPAP005	14	24.1	Female			HPAP005	68000	0.0581375	1.16964e+06
	HPAP006	46	19.1	Male			HPAP006	24700	0.0233487	1.05787e+06
	HPAP011	3	17.6	Male			HPAP011	33900	0.0502287	674913
	HPAP012	18	29.6	Female			HPAP012	68000	0.163631	415569
	HPAP014	43	30.93	Female			HPAP014	150000	0.19001	789432
	HPAP018	31	24.47	Male			HPAP018	76000	0.13016	583897
	HPAP022	39	34.7	Female			HPAP022	254000	0.325834	779538
	HPAP034	13	18.6	Male			HPAP034	6900	0.0427842	161275
	HPAP035	35	26.91	Male			HPAP035	88800	0.270675	328069
	HPAP036	23	16	Female			HPAP036	68400	0.201187	339982
	HPAP037	35	21.9	Female			HPAP037	6600	0.154693	42665.2
	HPAP042	1	17.9	Male			HPAP042	6000	0.00688792	871090
	HPAP056	33	32.89	Male			HPAP056	118800	0.159962	742675
	HPAP059	35	37.96	Male			HPAP059	32400	0.0298132	1.08677e+06
	HPAP063	45	38.41	Female			HPAP063	52800	0.218209	241970
	HPAP066	58	31.07	Female			HPAP066	33600	0.172682	194577
	HPAP067	26	34.97	Male			HPAP067	147600	0.297381	496334
	HPAP069	47	24.86	Female			HPAP069	272000	0.076489	3.55607e+06
	HPAP074	40	36.88	Female			HPAP074	169800	0.202048	840392
	HPAP075	35	27.52	Male			HPAP075	231000	0.201282	1.14764e+06
	HPAP077	47	32.78	Male			HPAP077	260000	0.242002	1.07437e+06
	HPAP080	22	35.71	Male			HPAP080	142800	0.235304	606876
	HPAP082	25	23.96	Male			HPAP082	16800	0.0359288	467591
	HPAP095	23	34.32	Female			HPAP095	1328000	0.464638	2.85814e+06
	HPAP099	28	24.7	Female			HPAP099	978000	0.43519	2.24729e+06
	HPAP101	55	38.01	Female			HPAP101	299000	0.17255	1.73283e+06
	HPAP103	48	36.44	Female			HPAP103	395000	0.186054	2.12305e+06
	HPAP104	4	20.63	Male			HPAP104	355000	0.0941671	3.76989e+06
	HPAP105	51	28.1	Female			HPAP105	306000	0.222621	1.37454e+06
	HPAP110	31	36.29	Male			HPAP110	118400	0.117975	1.0036e+06
	HPAP116	41	31.63	Female			HPAP116	668000	0.203267	3.28632e+06
	HPAP117	64	32.39	Male			HPAP117	112500	0.099926	1.12583e+06
	HPAP118	51	33.01	Female			HPAP118	100500	0.137946	728543
	HPAP119	48	29.45	Female			HPAP119	301500	0.357174	844127
	HPAP121	42	28.85	Male			HPAP121	82000	0.0818455	1.00189e+06
	HPAP122	21	30.05	Female			HPAP122	76000	0.103315	735617
	HPAP125	38	24.17	Male			HPAP125	94000	0.043752	2.14848e+06
	HPAP127	53	31	Male			HPAP127	57000	0.18657	305516
	HPAP128	49	30.12	Male			HPAP128	10000	0.326634	30615.3
	HPAP129	19	18.01	Female			HPAP129	14400	0.157331	91527
	HPAP131	23	22.5	Male			HPAP131	63000	0.288569	218319
	HPAP132	5	15.71	Female			HPAP132	25000	0.0614378	406916
	HPAP139	22	26.52	Male			HPAP139	354000	0.115727	3.05892e+06
	HPAP140	29	31.71	Female			HPAP140	258000	0.44143	584464
	ND with Aab+						ND with Aab+
n=13	Donor ID	Age (Years)	BMI (Kg/m2)	Gender		n=13	Donor ID	Glucagon content (pg/100islets)	Alpha for normalization	GCG content/ alpha cells in 100islets
	HPAP003	29	24.5	Male			HPAP003	102000	0.230181	443130
	HPAP008	24	31.9	Female			HPAP008	64000	0.135756	471433
	HPAP009	3	14.9	Male			HPAP009	36100	0.146526	246373
	HPAP016	30	25.21	Male			HPAP016	40000	0.0145998	2.73976e+06
	HPAP017	30	23.7	Male			HPAP017	282000	0.284206	992236
	HPAP019	22	29.8	Male			HPAP019	128000	0.205674	622344
	HPAP045	27	26.2	Female			HPAP045	178800	0.172357	1.03738e+06
	HPAP060	30	26.2	Male			HPAP060	71100	0.0458199	1.55173e+06
	HPAP072	19	23.1	Male			HPAP072	213000	0.117435	1.81376e+06
	HPAP092	21	25.59	Male			HPAP092	2160	0.0177203	121894
	HPAP107	15	23.59	Male			HPAP107	78000	0.0514973	1.51464e+06
	HPAP114	21	25.66	Female			HPAP114	318000	0.212622	1.49561e+06
	HPAP148	7	14.9	Male			HPAP148	92000	0.0506517	1.81633e+06
	T2D						T2D
n=27	Donor ID	Age (Years)	BMI (Kg/m2)	Gender	Duration of disease (Years)	n=27	Donor ID	Glucagon content (pg/100islets)	Alpha for normalization	GCG content/ alpha cells in 100islets
	HPAP001	47	32.2	Male	20		HPAP001	20100	0.0719905	279203
	HPAP010	42	36.8	Female	2		HPAP010	228000	0.272521	836632
	HPAP013	28	41.6	Female	5		HPAP013	196000	0.291507	672367
	HPAP061	59	38.27	Female	Unknown		HPAP061	123600	0.0964531	1.28145e+06
	HPAP062	56	26.48	Male	4_5		HPAP062	45600	0.0806007	565752
	HPAP065	40	37.47	Male	3		HPAP065	138000	0.0228134	6.04907e+06
	HPAP070	55	17.09	Male	16		HPAP070	24	0.0510379	470.239
	HPAP079	52	28.38	Female	10		HPAP079	290400	0.248745	1.16746e+06
	HPAP081	45	28.91	Female	20		HPAP081	217600	0.253694	857726
	HPAP083	45	35.62	Male	2-3 years		HPAP083	188400	0.174663	1.07865e+06
	HPAP085	48	39.78	Female	6-10 years		HPAP085	75600	0.111633	677217
	HPAP088	37	32.81	Male	10 days		HPAP088	17400	0.0818932	212472
	HPAP090	59	32.23	Female	4		HPAP090	296000	0.219051	1.35128e+06
	HPAP091	50	35.58	Female	3 months		HPAP091	96900	0.20236	478850
	HPAP096	56	38.7	Female	1		HPAP096	304000	0.197075	1.54256e+06
	HPAP100	41	28.83	Male	7-8 years		HPAP100	124800	0.0613993	2.0326e+06
	HPAP106	55	28.12	Male	3 years		HPAP106	559500	0.27741	2.01687e+06
	HPAP108	42	33	Male	NA		HPAP108	50000	0.0415375	1.20373e+06
	HPAP109	59	29.49	Female	<5 years		HPAP109	292000	0.215229	1.35669e+06
	HPAP111	63	24.25	Male	NA		HPAP111	245600	0.258284	950890
	HPAP115	46	28.72	Male	5-6 years		HPAP115	91500	0.0447278	2.04571e+06
	HPAP120	63	29.6	Female	2-3 years		HPAP120	214000	0.367157	582858
	HPAP124	47	30.96	Male	10 years		HPAP124	70000	0.143849	486622
	HPAP126	50	31.01	Female	1 month		HPAP126	144000	0.159616	902165
	HPAP133	49	25.42	Female	NA		HPAP133	39000	0.316192	123343
	HPAP142	43	23.48	Male	0-5 years		HPAP142	530000	0.190951	2.77558e+06
	HPAP144	61	32.56	Male	6 months		HPAP144	45000	0.106525	422436
	T1D
n=9	Donor ID	Age (Years)	BMI (Kg/m2)	Gender	Duration of disease (Years)		T1D
	HPAP002	26	16.4	Male	5	n=9	Donor ID	Glucagon content (pg/100islets)	Alpha for normalization	GCG content/ alpha cells in 100islets
	HPAP020	14	13.2	Male			HPAP002	13500	0.00798814	1.69001e+06
	HPAP071	12	15.42	Female	3		HPAP020	14500	0.0509456	284617
	HPAP084	12	18.5	Female	NA		HPAP071	97200	0.414143	234702
	HPAP087	15	19.3	Female	6-10 years		HPAP084	202800	0.148228	1.36816e+06
	HPAP102	18	20.65	Male	6 years		HPAP087	10400	0.0325825	319190
	HPAP113	9	15.92	Male	recent DKA		HPAP102	5600	0.0375143	149276
	HPAP123	25	21.35	Male	3 years		HPAP113	376800	0.104224	3.61528e+06
	HPAP138	35	23.63	Female	8 years		HPAP123	70000	0.648749	107900
							HPAP138	906000	0.493844	1.83459e+06
Graph 3F
n=41	ND without Autoantibodies	Donor ID	Age (Years)	BMI (Kg/m2)	Gender						n=41	ND without Autoantibodies		CCDC73	PDX1-AS1	PELI2	Average alpha markers			n=41	ND without Autoantibodies		Insulin	FBXL19	DLG5	Average beta markers		n=41	ND without Autoantibodies		PTPRE	PRDM2	GRB10	FBXW12	SPATA21	Average acinar markers
		HPAP004	24	32.2	Female								HPAP004	38.1183	19.5825	40.8186	32.8398					HPAP004	37.3982	36.5804	39.2904	37.7563				HPAP004	4.24769	4.0661	3.07956	4.93061	2.33012	3.73082
		HPAP005	14	24.1	Female								HPAP005	5.20919	4.27926	7.95279	5.81375					HPAP005	25.7165	23.4258	18.9615	22.7013				HPAP005	27.6152	20.9439	20.2388	20.7409	22.0437	22.3165
		HPAP006	46	19.1	Male								HPAP006	2.5324	1.18651	2.78727	2.16873					HPAP006	13.5224	16.8143	13.5484	14.6284				HPAP006	32.5932	32.2476	34.7219	35.5012	33.6218	33.7371
		HPAP011	3	17.6	Male								HPAP011	6.3034	1.51249	7.25272	5.02287					HPAP011	10.7325	8.23019	10.7841	9.91559				HPAP011	36.2691	37.5692	37.9858	35.5163		36.8351
		HPAP012	18	29.6	Female								HPAP012	18.836	7.04616	23.2071	16.3631					HPAP012	33.83	39.5611	35.9681	36.4531				HPAP012	7.78796	8.21391	6.4909	8.95207	4.90452	7.26987
		HPAP014	43	30.93	Female								HPAP014	19.7654	14.3376	22.9001	19.001					HPAP014	56.6442	54.5852	46.3141	52.5145				HPAP014	3.40749	6.19374	6.28833	4.29996	3.12915	4.66374
		HPAP018	31	24.47	Male								HPAP018	18.1436	5.76868	15.1357	13.016					HPAP018	28.3756	29.7789	35.8425	31.3323				HPAP018	15.4919	21.3047	17.4263	21.4556	15.283	18.1923
		HPAP022	39	34.7	Female								HPAP022	34.1616	23.1952	40.3933	32.5834					HPAP022	39.1213	42.1776	46.4705	42.5898				HPAP022	1.36212	2.32663	1.3627	2.67241	2.19782	1.98434
		HPAP035	35	26.91	Male								HPAP035	33.2357	13.5227	34.444	27.0675					HPAP035	32.951	30.3467	32.2347	31.8441				HPAP035	9.42571	8.51323		9.76665	11.5267	9.80807
		HPAP036	23	16	Female								HPAP036	25.3184	12.6456	23.9347	20.6329					HPAP036	36.5401	31.8376	35.1852	34.521				HPAP036	11.3827	12.0002		13.9249	11.299	12.1517
		HPAP037	35	21.9	Female								HPAP037	15.5769	10.2489	20.582	15.4693					HPAP037	49.8086	43.8745	38.6724	44.1185				HPAP037	3.37559	4.40109		5.37216	4.62759	4.44411
		HPAP042	1	17.9	Male								HPAP042	0.312332	1.2862	0.467847	0.688792					HPAP042	0.986869	2.01197	4.9572	2.65201				HPAP042	60.1142	58.8202		58.2582	50.3311	56.8809
		HPAP056	33	32.89	Male								HPAP056	17.0748	13.0737	17.8402	15.9962					HPAP056	26.2643	22.8281	25.7972	24.9632				HPAP056	26.8021	23.5333		27.8926	29.7956	27.0059
		HPAP063	45	38.41	Female								HPAP063	18.6132	22.9664	23.883	21.8209					HPAP063	34.991	33.6208	30.3254	32.9791				HPAP063	5.03465	5.70848		7.12688	5.60085	5.86772
		HPAP066	58	31.07	Female								HPAP066	12.8968	19.5788	19.3289	17.2682					HPAP066	19.924	21.2523	23.98	21.7188				HPAP066	23.9082	24.5723	27.5102	26.1652	23.0761	25.0464
		HPAP067	26	34.97	Male								HPAP067	28.9779	28.8349	31.4013	29.7381					HPAP067	24.7412	24.6876	22.8128	24.0805				HPAP067	10.7394	12.3174		13.5831	9.58848	11.5571
		HPAP069	47	24.86	Female								HPAP069	5.73694	6.87346	10.3363	7.6489					HPAP069	12.9624	9.15791	14.0239	12.0481				HPAP069	35.7303	36.8325		39.9966	45.0351	39.3986
		HPAP074	40	36.88	Female								HPAP074	18.4175	17.8243	24.3727	20.2048					HPAP074	51.7453	50.849	49.01	50.5348				HPAP074	1.47171	4.04007		3.4243	2.50838	2.86112
		HPAP075	35	27.52	Male								HPAP075	17.9036	18.9739	23.5072	20.1282					HPAP075	51.4109	50.9235	46.5293	49.6213				HPAP075	5.11629	6.02185	3.14149	6.66907	4.797	5.14914
		HPAP077	47	32.78	Male								HPAP077	20.9388	23.6271	28.0348	24.2002					HPAP077	46.4721	41.3826	44.875	44.2432				HPAP077	4.20286	5.32949		5.19504	3.19614	4.48088
		HPAP080	22	35.71	Male								HPAP080	21.9875	21.1558	27.4477	23.5304					HPAP080	38.6652	35.9055	38.7953	37.7887				HPAP080	4.65548	6.47248	3.48143	5.46041	4.47124	4.90821
		HPAP095	23	34.32	Female								HPAP095	49.237	39.3417	50.8128	46.4638					HPAP095	27.5062	27.9936	22.2011	25.9003				HPAP095	4.2276	6.28081		6.61755	5.46395	5.64748
		HPAP099	28	24.7	Female								HPAP099	45.4327	37.6837	47.4406	43.519					HPAP099	24.0293	20.9455	24.1121	23.029				HPAP099	4.94546	8.04401	5.00657	6.32721	5.20478	5.90561
		HPAP101	55	38.01	Female								HPAP101	14.9706	16.1822	20.6124	17.2551					HPAP101	57.7937	56.3503	59.8013	57.9818				HPAP101	2.63138	4.0447	3.5355	3.61242	3.36818	3.43844
		HPAP103	48	36.44	Female								HPAP103	19.6445	13.5194	22.6522	18.6054					HPAP103	45.4289	42.1553	47.1221	44.9021				HPAP103	7.06882	1.82616		9.90244	1.23721	5.00866
		HPAP104	4	20.63	Male								HPAP104	8.5836	7.16384	12.5027	9.41671					HPAP104	29.1524	26.7579	21.499	25.8031				HPAP104	22.4168	22.0445		23.1298	18.3819	21.4933
		HPAP105	51	28.1	Female								HPAP105	27.7326	9.43465	29.6189	22.2621					HPAP105	62.6093	53.6385	57.4962	57.9147				HPAP105	2.15846	3.4657		3.0845	3.37806	3.02168
		HPAP110	31	36.29	Male								HPAP110	11.5364	8.16862	15.6875	11.7975					HPAP110	60.5309	60.6007	57.2827	59.4714				HPAP110	5.79587	6.47705	5.14436	5.10004	5.65479	5.63442
		HPAP116	41	31.63	Female								HPAP116	19.8264	16.191	24.9627	20.3267					HPAP116	36.5987	29.0091	36.323	33.9769				HPAP116	14.6617	17.0457	12.8307	17.5752	14.225	15.2677
		HPAP117	64	32.39	Male								HPAP117	9.93638	7.35659	12.6848	9.9926					HPAP117	43.2757	36.7981	41.5401	40.538				HPAP117	4.44686	8.44269	5.90044	7.01332	6.00007	6.36068
		HPAP118	51	33.01	Female								HPAP118	14.5354	8.93526	17.9133	13.7947					HPAP118	44.5027	43.2623	45.3182	44.3611				HPAP118	9.66785	12.6216	11.3349	14.6267	9.22266	11.4948
		HPAP119	48	29.45	Female								HPAP119	37.4171	31.6278	38.1072	35.7174					HPAP119	36.5095	33.3651	35.8407	35.2385				HPAP119	5.06949	9.38304	5.98053	7.06788	5.38101	6.57639
		HPAP121	42	28.85	Male								HPAP121	9.9307	3.98564	10.6373	8.18455					HPAP121	70.7267	66.2437	61.323	66.0978				HPAP121	3.25714	4.42419	2.51128	3.54595	2.89338	3.32639
		HPAP122	21	30.05	Female								HPAP122	9.22867	8.01285	13.7529	10.3315					HPAP122	59.7162	46.9195	45.2611	50.6323				HPAP122	6.45087	5.95923	5.68249	7.98328	9.68283	7.15174
		HPAP125	38	24.17	Male								HPAP125	2.46331	8.88321	1.77908	4.3752					HPAP125	5.80596	4.25497	8.07968	6.04687				HPAP125	48.7081	49.147		48.5002	54.9101	50.3163
		HPAP127	53	31	Male								HPAP127	22.0154	14.5163	19.4391	18.657					HPAP127	36.7014	31.9726	35.3743	34.6828				HPAP127	4.67512	7.44612	7.03621	6.78338	5.14547	6.21726
		HPAP128	49	30.12	Male								HPAP128	35.0131	27.186	35.7909	32.6634					HPAP128	28.921	22.1645	28.7076	26.5977				HPAP128	5.27959	7.82326	6.31405	6.21007	6.72493	6.47038
		HPAP129	19	18.01	Female								HPAP129	11.9843	15.9272	19.2877	15.7331					HPAP129	37.8127	34.427	32.7194	34.9864				HPAP129	4.30505	5.59914		5.77845	4.8212	5.12596
		HPAP131	23	22.5	Male								HPAP131	26.849	28.4327	31.2889	28.8568					HPAP131	29.9535	24.803	27.2195	27.3253				HPAP131	5.23368	8.34208		6.40124	5.3993	6.34407
		HPAP132	5	15.71	Female								HPAP132	6.328	3.63703	8.46632	6.14378					HPAP132	25.4791	21.8364	20.7333	22.6829				HPAP132	26.4921	26.0416		28.1935	26.6231	26.8376
		HPAP139	22	26.52	Male								HPAP139	11.5	10.0139	13.2043	11.5727					HPAP139	30.5235	26.6635	22.6232	26.6034				HPAP139	13.7845	16.116	13.252	13.3028	13.0805	13.9071
																Average	18.4603								Average	34.2385									Average	13.5082
																SD	10.7388								SD	14.7955									SD	13.5093
n=15	ND with Autoantibodies	Donor ID	Age (Years)	BMI (Kg/m2)	Gender						n=15	ND with Autoantibodies		CCDC73	PDX1-AS1	PELI2	Average alpha markers			n=15	ND with Autoantibodies		Insulin	FBXL19	DLG5	Average beta markers		n=15	ND with Autoantibodies		PTPRE	PRDM2	GRB10	FBXW12	SPATA21	Average acinar markers
		HPAP003	29	24.5	Male								HPAP003	25.4249	15.4825	28.1469	23.0181					HPAP003	44.5401	32.9663	43.0631	40.1898				HPAP003	2.81432	3.42962	2.42534	3.05436	2.23822	2.79237
		HPAP008	24	31.9	Female								HPAP008	16.1665	7.23747	17.3229	13.5756					HPAP008	38.7728	39.8454	30.9934	36.5372				HPAP008	12.8914	16.7614	15.9857	17.3278	14.7307	15.5394
		HPAP009	3	14.9	Male								HPAP009	9.57269	14.8527	19.5323	14.6526					HPAP009	27.4844	29.6354	21.1232	26.081				HPAP009	17.5975	22.5511	21.2455	19.2112	16.8678	19.4946
		HPAP016	30	25.21	Male								HPAP016	1.0951	2.51756	0.767285	1.45998					HPAP016	6.21734	5.00357	10.5884	7.26978				HPAP016	31.4643	32.3045	38.8894	31.268	30.8727	32.9598
		HPAP017	30	23.7	Male								HPAP017	32.9053	18.9973	33.3594	28.4206					HPAP017	38.5825	35.2817	36.1759	36.68				HPAP017	2.63751	4.73036	5.01771	3.67058	4.10051	4.03133
		HPAP019	22	29.8	Male								HPAP019	20.6974	14.3604	26.6444	20.5674					HPAP019	39.5922	41.6564	42.8922	41.3803				HPAP019	3.83716	6.87607	6.10309	7.38152	5.93617	6.0268
		HPAP024	18	24.3	Male								HPAP024	5.95133	2.15653	7.31304	5.1403					HPAP024	29.3005	27.0678	33.6188	29.9957				HPAP024	25.0967	30.4708		28.5253	1.23721	21.3325
		HPAP029	23	28.6	Male								HPAP029	10.1785	6.9694	13.4813	10.2097					HPAP029	38.3844	30.6404	36.1874	35.0707				HPAP029	13.1933	13.8948	13.7523	17.167	12.7403	14.1495
		HPAP045	27	26.2	Female								HPAP045	16.7172	13.68	21.3099	17.2357					HPAP045	36.0197	31.3758	33.2435	33.5463				HPAP045	17.3247	14.1514		20.8942	17.5019	17.4681
		HPAP060	30	26.2	Male								HPAP060	2.21235	9.35487	2.17876	4.58199					HPAP060	5.54116	4.03818	8.14247	5.90727				HPAP060	36.7267	27.0374	40.0043	40.422	37.4871	36.3355
		HPAP072	19	23.1	Male								HPAP072	9.46678	10.4849	15.279	11.7435					HPAP072	34.8416	33.3053	34.4041	34.1837				HPAP072	10.1338	9.60761		10.7149	11.1672	10.4059
		HPAP092	21	25.59	Male								HPAP092	0.287103	4.28396	0.745024	1.77203					HPAP092	2.9514	2.62546	5.56695	3.7146				HPAP092	33.1587	32.8397	31.0033	35.2684	30.5412	32.5623
		HPAP107	15	23.59	Male								HPAP107	6.83623	1.64806	6.96489	5.14973					HPAP107	25.8277	19.48	23.3391	22.8823				HPAP107	41.5285	38.1581	40.0576	40.4566	38.5045	39.741
		HPAP114	21	25.66	Female								HPAP114	23.2745	13.5445	26.9676	21.2622					HPAP114	44.493	43.0139	37.0967	41.5345				HPAP114	7.47465	9.56153	9.56939	10.9431	8.41056	9.19185
		HPAP148	7	14.9	Male								HPAP148	3.99108	4.09011	7.11431	5.06517					HPAP148	33.4529	31.6086	26.0665	30.376				HPAP148	16.1739	16.1288		15.3117	14.1149	15.4323
																Average	12.257								Average	28.3566									Average	18.4976
																SD	8.5342								SD	13.3557									SD	12.3321
n=26	T2D	Donor ID	Age (Years)	BMI (Kg/m2)	Gender	Duration of disease (Years)					n=26	T2D		CCDC73	PDX1-AS1	PELI2	Average alpha markers			n=26	T2D		Insulin	FBXL19	DLG5	Average beta markers		n=26	T2D		PTPRE	PRDM2	GRB10	FBXW12	SPATA21	Average acinar markers
		HPAP001	47	32.2	Male	20							HPAP001	8.79957	1.58179	11.2158	7.19905					HPAP001	19.0615	13.0628	19.1552	17.0932				HPAP001	25.6491	29.7591	26.6289	32.1938	25.1843	27.883
		HPAP010	42	36.8	Female	2							HPAP010	31.0271	18.3395	32.3897	27.2521					HPAP010	33.6812	36.5378	36.0625	35.4272				HPAP010	14.1635	13.2743	10.2484	12.6611	9.76648	12.0228
		HPAP013	28	41.6	Female	5							HPAP013	28.7036	21.0442	37.7045	29.1507					HPAP013	42.3766	44.5174	46.1537	44.3492				HPAP013	3.87161	4.94644	4.97024	4.54559	3.88015	4.44281
		HPAP061	59	38.27	Female	Unknown							HPAP061	8.57391	7.81988	12.5421	9.64531					HPAP061	18.0912	15.4261	21.1418	18.2197				HPAP061	33.5121	37.2314	44.4932	38.4827	41.9269	39.1293
		HPAP062	56	26.48	Male	4_5							HPAP062	7.41128	5.09558	11.6733	8.06007					HPAP062	12.6692	9.81825	15.844	12.7772				HPAP062	14.2944	18.7949		16.5452	16.0995	16.4335
		HPAP065	40	37.47	Male	3							HPAP065	0.670432	3.46481	2.70879	2.28134					HPAP065	11.9406	9.19185	14.0267	11.7197				HPAP065	22.1946	15.9586	16.4441	24.2763	20.5148	19.8777
		HPAP070	55	17.09	Male	16							HPAP070	4.58577	2.15254	8.57306	5.10379					HPAP070	4.39153	5.54106	9.12438	6.35232				HPAP070	38.9539	39.8294	43.2302	44.7675	48.9734	43.1509
		HPAP079	52	28.38	Female	10							HPAP079	22.4121	21.442	30.7695	24.8745					HPAP079	32.3439	32.0483	33.1097	32.5006				HPAP079	16.4273	13.3897		15.6677	15.8313	15.329
		HPAP081	45	28.91	Female	20							HPAP081	23.6331	17.698	34.7771	25.3694					HPAP081	32.2742	26.312	31.3499	29.9787				HPAP081	9.45739	10.5523	7.32727	10.3282	11.0961	9.75226
		HPAP083	45	35.62	Male	2-3 years							HPAP083	14.2057	19.5471	18.6463	17.4664					HPAP083	11.8216	10.9736	13.5907	12.1286				HPAP083	24.0384	26.3599	20.7388	24.6893	22.7778	23.7208
		HPAP085	48	39.78	Female	6-10 years							HPAP085	12.3583	4.82344	16.3082	11.1633					HPAP085	58.0282	51.9698	52.0488	54.0156				HPAP085	6.86515	7.40044		7.46488	8.31176	7.51056
		HPAP088	37	32.81	Male	10 days							HPAP088	7.22185	5.79781	11.5483	8.18932					HPAP088	17.0191	13.6904	17.1419	15.9505				HPAP088	32.1151	33.5587		34.5909	29.7637	32.5071
		HPAP091	50	35.58	Female	3 months							HPAP091	21.4035	16.9959	22.3086	20.236					HPAP091	23.5769	20.7449	25.6783	23.3334				HPAP091	13.826	17.0522	14.7863	14.5392	14.7664	14.994
		HPAP096	56	38.7	Female	1							HPAP096	18.6075	18.6337	21.8813	19.7075					HPAP096	43.2754	39.8706	40.5044	41.2168				HPAP096	9.04302	11.4314	8.303	9.03542	7.62299	9.08716
		HPAP100	41	28.83	Male	7-8 years							HPAP100	4.85427	4.62827	8.93724	6.13993					HPAP100	6.34007	6.66045	9.64601	7.54884				HPAP100	31.4219	32.0616		36.0054	33.8303	33.3298
		HPAP106	55	28.12	Male	3 years							HPAP106	34.7945	12.9777	35.4508	27.741					HPAP106	30.9003	22.1891	28.5124	27.2006				HPAP106	13.218	14.4826		13.6305	16.1758	14.3767
		HPAP108	42	33	Male	NA							HPAP108	2.84595	3.45065	6.16466	4.15375					HPAP108	9.77428	8.44448	12.9696	10.3961				HPAP108	30.2585	31.24	33.6214	31.5879	31.8684	31.7152
		HPAP109	59	29.49	Female	<5 years							HPAP109	19.4686	17.4476	27.6525	21.5229					HPAP109	36.7522	32.2191	35.4103	34.7939				HPAP109	21.1952	20.6271	21.8762	22.6997	17.7276	20.8251
		HPAP111	63	24.25	Male	NA							HPAP111	29.0281	17.3348	31.1224	25.8284					HPAP111	47.5492	43.4907	46.4084	45.8161				HPAP111	7.06118	7.57731	7.29306	7.71673	7.59364	7.44838
		HPAP115	46	28.72	Male	5-6 years							HPAP115	4.30758	0.00455169	9.10622	4.47278					HPAP115	13.8746	10.7637	16.7226	13.787				HPAP115	17.3505	17.9268	20.8729	18.1015	19.9511	18.8406
		HPAP120	63	29.6	Female	2-3 years							HPAP120	36.4314	28.2814	45.4343	36.7157					HPAP120	32.0637	26.1587	30.2168	29.4797				HPAP120	2.49781	4.58248	3.38436	5.38913	3.69605	3.90997
		HPAP124	47	30.96	Male	10 years							HPAP124	17.6425	7.97932	17.5328	14.3849					HPAP124	62.1049	62.7993	58.5011	61.1351				HPAP124	2.3556	3.57294	2.46032	3.31146	3.26051	2.99217
		HPAP126	50	31.01	Female	1 month							HPAP126	15.6283	14.8385	17.418	15.9616					HPAP126	50.5464	45.4718	50.253	48.7571				HPAP126	2.97865	7.52691		4.52755	4.37414	4.85181
		HPAP133	49	25.42	Female	NA							HPAP133	35.1289	24.5422	35.1863	31.6192					HPAP133	33.2963	32.3755	33.5263	33.066				HPAP133	11.7205	11.5475	11.5465	12.4656	11.5197	11.76
		HPAP142	43	23.48	Male	0-5 years							HPAP142	17.4898	17.8236	21.9718	19.0951					HPAP142	27.0577	20.104	24.2821	23.8146				HPAP142	20.2922	22.8571		21.2962	18.8157	20.8153
		HPAP144	61	32.56	Male	6 months							HPAP144	8.88094	10.0395	13.0371	10.6525					HPAP144	28.0199	21.9969	26.8525	25.6231				HPAP144	18.0158	17.513	16.1481	21.4383	15.1507	17.6532
																Average	16.6918								Average	27.557									Average	17.86
																SD	9.81625								SD	15.0547									SD	11.1686
n=10	T1D	Donor ID	Age (Years)	BMI (Kg/m2)	Gender	Duration of disease (Years)					n=10	T1D		CCDC73	PDX1-AS1	PELI2	Average alpha markers			n=10	T1D		Insulin	FBXL19	DLG5	Average beta markers		n=10	T1D		PTPRE	PRDM2	GRB10	FBXW12	SPATA21	Average acinar markers
		HPAP002	26	16.4	Male	5							HPAP002	0.303102	1.373	0.720337	0.798814					HPAP002	0.962956	1.2181	0.98659	1.05588				HPAP002	56.9665	61.3685	69.7549	61.5372	66.2218	63.1698
		HPAP015	29	22.03	Male	7							HPAP015	3.00322	3.95016	1.09488	2.68275					HPAP015	0.326014	0.27821	0.551253	0.385159				HPAP015	40.6909	42.9181	48.3049	41.9578	45.3913	43.8526
		HPAP020	14	13.2	Male								HPAP020	2.44152	6.45248	6.38967	5.09456					HPAP020	3.3093	3.3591	2.99162	3.22001				HPAP020	31.1894	34.0208	31.0833	36.1542	29.3868	32.3669
		HPAP071	12	15.42	Female	3							HPAP071	37.6158	36.9519	49.6751	41.4142					HPAP071	2.26308	4.95276	1.05696	2.7576				HPAP071	15.0095	15.3125		18.6585	12.604	15.3962
		HPAP084	12	18.5	Female	NA							HPAP084	12.6241	12.5538	19.2905	14.8228					HPAP084	31.4912	48.5637	21.311	33.7886				HPAP084	11.4259	12.8398	11.1968	12.1766	10.7364	11.6751
		HPAP087	15	19.3	Female	6-10 years							HPAP087	1.89302	6.92623	0.955485	3.25825					HPAP087		0.231365	0.212169	0.221767				HPAP087	56.4787	51.8691		58.9861	47.2328	53.6417
		HPAP102	18	20.65	Male	6 years							HPAP102	1.82217	5.99448	3.43764	3.75143					HPAP102	0.657706	1.27739	0.527482	0.820858				HPAP102	33.4507	37.618	40.075	37.3578	30.9684	35.894
		HPAP113	9	15.92	Male	recent DKA							HPAP113		5.30357	15.5413	10.4224					HPAP113	19.8681	24.0106	13.0246	18.9678				HPAP113	31.9152	33.0013	31.7577	35.5018	29.8692	32.409
		HPAP123	25	21.35	Male	3 years							HPAP123	69.6193	61.2069	63.7985	64.8749					HPAP123	8.88833	12.4644	7.01135	9.45468				HPAP123	2.01902	4.53184	1.67591	3.59038	2.82025	2.92748
		HPAP138	35	23.63	Female	8 years							HPAP138	49.2099	45.5083	53.4351	49.3844					HPAP138	14.9781	26.2811	12.5156	17.925				HPAP138	6.22095	5.44316	4.85905	5.34148	5.30136	5.4332
																Average	19.6505								Average	8.85973									Average	29.6766
																SD	23.3051								SD	11.2899									SD	20.4985
Graph 3G
	Insulin secretion/ 100 islets	ND without Aab+																																									n=41						ND with Autoantibodies
Time (min)	Stimulus	HPAP004	HPAP005	HPAP006	HPAP011	HPAP012	HPAP014	HPAP018	HPAP022	HPAP034	HPAP035	HPAP036	HPAP042	HPAP056	HPAP059	HPAP063	HPAP066	HPAP067	HPAP069	HPAP074	HPAP075	HPAP082	HPAP095	HPAP099	HPAP101	HPAP103	HPAP104	HPAP105	HPAP110	HPAP117	HPAP118	HPAP119	HPAP121	HPAP122	HPAP125	HPAP127	HPAP128	HPAP129	HPAP131	HPAP132	HPAP139	HPAP140	Average	STDEV			Time (min)	Stimulus	HPAP003
20	No Stimuli	0.55833	0.29792	0.303819	0.070486	0.260069	3.0333	0.821528	0.619792	0.109565	1.28819	0.498264	0.015972	0.264583	0.160417	0.330556	0.223438	0.520139	0.894444	1.91042	1.10347	0.077778	1.72326	1.81806	0.892014	1.41701	0.116667	0.721875	0.384028	1.71111	0.709722	1.43889	0.827083	0.2625	0.126389	1.02812	0.797222	0.30625	2.12188	0.143403	0.943056	2.36007	0.810027	0.72185			20	No Stimuli	0.41982
21	No Stimuli	0.64375	0.31875	0.323264	0.109375	0.286806	3.0455	0.721875	0.738889	0.121739	1.23958	0.478819	0.013194	0.289583	0.161111	0.365972	0.235937	0.510417	0.904167	1.42917	1.09861	0.076389	1.73785	1.6941	0.836111	1.48264	0.155556	0.687847	0.345139	1.62604	0.675694	1.39757	0.732639	0.298958	0.162847	1.05243	0.761111	0.277083	2.08299	0.116667	0.957639	2.2434	0.791151	0.688913			21	No Stimuli	0.45076
22	No Stimuli	0.52708	0.27083	0.250347	0.080208	0.211458	2.9142	0.687847	0.860417	0.146087	1.13021	0.486111	0.013889	0.309028	0.140972	0.463194	0.243229	0.447222	0.933333	1.41944	0.804514	0.127778	1.56528	1.82292	0.828819	1.30521	0.109375	0.665972	0.311111	1.98333	0.639236	1.24444	0.650694	0.201736	0.094792	0.833681	0.694444	0.238194	1.66493	0.102083	0.977083	2.39653	0.751153	0.680178			22	No Stimuli	0.37563
23	No Stimuli	0.59167	0.26042	0.260069	0.138542	0.252778	3.0212	0.687847	0.777778	0.13087	0.969792	0.405903	0.014236	0.223611	0.154167	0.340278	0.250173	0.486111	0.943056	1.37813	0.853125	0.076389	1.59688	1.85451	0.717014	1.33681	0.106944	0.602778	0.313542	1.88854	0.542014	1.27847	0.529167	0.315972	0.126389	0.850694	0.747222	0.192014	1.47535	0.092361	1.05	2.19236	0.732321	0.670573			23	No Stimuli	0.3447
24	No Stimuli	0.6875	0.29583	0.277083	0.070486	0.269792	3.2983	0.590625	0.780208	0.164348	1.10833	0.337847	0.015972	0.251389	0.131944	0.359722	0.213541	0.512847	0.867708	1.14479	0.964931	0.108333	1.60417	1.84236	0.823958	1.31007	0.104514	0.563889	0.274653	1.91042	0.561458	1.26875	0.661111	0.30625	0.125	0.950347	0.777778	0.230903	1.79861	0.136111	0.838542	2.14375	0.748394	0.697925			24	No Stimuli	0.369
25	No Stimuli	0.57083	0.2875	0.235764	0.092361	0.228472	2.9604	0.605208	0.746181	0.143043	1.03299	0.267361	0.016667	0.297222	0.15	0.340972	0.251736	0.488542	0.823958	1.14479	0.870139	0.125	1.575	1.74271	0.724306	1.28333	0.123958	0.585764	0.235764	1.72326	0.512847	1.31493	0.474306	0.264931	0.12	0.792361	0.766667	0.235764	1.54097	0.384028	0.836111	1.87396	0.702198	0.628983			25	No Stimuli	0.33586
26	No Stimuli	0.53542	0.2875	0.281944	0.0875	0.209028	2.5764	0.510417	0.682986	0.106522	0.887153	0.247917	0.010417	0.229167	0.117361	0.261111	0.25434	0.515278	0.56875	1.225	0.860417	0.140278	1.76458	1.83021	0.719444	1.21528	0.099653	0.522569	0.21875	1.42431	0.505556	1.32951	0.480556	0.252778	0.11	0.845833	0.655556	0.257639	1.49965	0.140972	0.777778	1.96146	0.663585	0.608272			26	No Stimuli	0.38447
27	No Stimuli	0.55417	0.28333	0.277083	0.058333	0.238194	2.2604	0.495833	0.6125	0.103478	0.765625	0.260069	0.011806	0.232639	0.109028	0.272917	0.219098	0.515278	0.685417	1.01111	0.777778	0.044444	1.52639	1.78403	0.709722	1.18368	0.104514	0.503125	0.204167	1.54097	0.469097	1.15694	0.373611	0.223611	0.094792	0.763194	0.630556	0.257639	1.57743	0.114236	0.707292	1.26875	0.609324	0.542282			27	No Stimuli	0.34249
28	No Stimuli	0.63542	0.28125	0.235764	0.048611	0.167708	2.5764	0.495833	0.670833	0.118696	0.814236	0.371875	0.007292	0.219444	0.124306	0.3	0.290104	0.398611	0.644097	1.02326	0.658681	0.094444	1.58958	1.68681	0.668403	1.12049	0.089931	0.478819	0.187153	1.68194	0.459375	1.14236	0.318056	0.245486	0.092361	0.755903	0.641667	0.308681	1.39271	0.114236	0.738889	1.80347	0.626663	0.583302			28	No Stimuli	0.30713
29	No Stimuli	0.55833	0.28542	0.228472	0.048611	0.192014	2.2653	0.490972	0.668403	0.112609	0.806944	0.211458	0.012847	0.211111	0.109722	0.267361	0.212152	0.432639	0.721875	1.03542	0.653819	0.051389	1.62118	1.63819	0.629514	1.13264	0.070486	0.459375	0.177431	1.53854	0.396181	1.18611	0.344444	0.167708	0.097222	1.02083	0.630556	0.311111	1.46806	0.085069	0.935764	1.81806	0.617203	0.569723			29	No Stimuli	0.28062
30	Amino acid Mixure, 4 mM	0.5875	0.24375	0.162847	0.048611	0.192014	2.4354	0.551736	0.753472	0.146087	0.916319	0.209028	0.017361	0.245833	0.121528	0.330556	0.264062	0.456944	0.746181	0.775347	0.692708	0.115278	1.40486	1.68437	0.641667	1.00625	0.104514	0.439931	0.39375	1.38542	0.403472	1.1059	0.315278	0.153125	0.099653	0.794792	0.605556	0.199306	1.36597	0.114236	0.802083	1.66007	0.602263	0.542445			30	Amino acid Mixure, 4 mM	0.28504
31	Amino acid Mixure, 4 mM	0.57083	0.21042	0.247917	0.048611	0.172569	2.2507	0.459375	0.675694	0.127826	0.928472	0.235764	0.015278	0.19375	0.108333	0.284028	0.178473	0.427778	0.658681	0.806944	0.653819	0.177778	1.41215	1.59444	0.624653	1.02569	0.097222	0.488542	0.160417	1.33681	0.408333	1.18854	0.2625	0.140972	0.094792	0.799653	0.75	0.221181	1.28819	0.145833	0.719444	1.59931	0.580286	0.522918			31	Amino acid Mixure, 4 mM	0.2298
32	Amino acid Mixure, 4 mM	0.62083	0.24375	0.260069	0.048611	0.150694	1.7306	0.367014	0.789931	0.136957	0.991667	0.532292	0.012847	0.316667	0.159722	0.288194	0.370833	0.439931	1.02569	2.35278	1.96146	0.084722	1.63819	1.96389	1.23958	1.47292	0.145833	0.763194	0.627083	1.77674	0.913889	2.33819	0.434028	0.289236	0.170139	1.42431	0.747222	0.780208	1.96875	0.109375	1.0184	2.57639	0.860557	0.740916			32	Amino acid Mixure, 4 mM	0.48611
33	Amino acid Mixure, 4 mM	0.86042	0.62083	0.206597	0.119097	0.153125	1.6333	0.537153	1.42431	0.194783	1.97847	0.811806	0.0125	0.590972	0.395833	0.925	0.607291	0.503125	2.20694	4.79063	4.44549	0.234722	1.87639	1.94444	2.00521	2.08299	0.216319	1.88125	1.36111	2.45243	2.41111	3.14271	1.38889	0.571181	0.230903	2.30174	1.34444	1.16667	2.71007	0.140972	1.90312	4.86111	1.44501	1.25509			33	Amino acid Mixure, 4 mM	1.1799
34	Amino acid Mixure, 4 mM	0.9	0.27708	0.216319	0.106944	0.177431	2.1413	0.430208	2.54236	0.185652	1.64792	0.595486	0.015972	0.520139	0.391667	0.884722	0.403299	0.352431	1.08889	3.53646	2.38681	0.158333	1.30035	1.38056	1.23715	1.37083	0.170139	1.10347	0.734028	2.27986	1.83264	1.93958	0.315972	0.449653	0.194444	1.87153	1.10833	0.6125	1.50208	0.167708	1.91528	3.67743	1.07617	0.932358			34	Amino acid Mixure, 4 mM	0.61869
35	Amino acid Mixure, 4 mM	0.82083	0.26667	0.386458	0.136111	0.187153	2.6566	0.734028	2.41354	0.155217	0.916319	0.267361	0.013542	0.342361	0.305556	0.6125	0.315798		0.721875	2.16076	1.18611	0.130556	1.14236	1.09132	0.760764	0.943056	0.133681	0.517708	0.396181	2.29201	1.00382	1.02083	0.934028	0.371875	0.121528	1.5191	0.886111	0.376736	1.12535	0.157986	1.60903	2.64931	0.844553	0.732797			35	Amino acid Mixure, 4 mM	0.30934
36	Amino acid Mixure, 4 mM	0.70625	0.26042	1.07917	0.252778	0.391319	2.1486	0.957639	2.14861	0.143043	0.507986	0.192014	0.016319	0.197222	0.239583	0.377083	0.244271	0.337847	0.583333	1.37813	0.838542	0.145833	1.17639	1.12049	0.65625	0.83125	0.070486	0.342708	0.250347	2.18264	0.648958	0.933333	0.633333	0.2625	0.13125	1.40486	0.65	0.240625	0.967361	0.148264	1.63333	1.66736	0.7097	0.601846			36	Amino acid Mixure, 4 mM	0.21654
37	Amino acid Mixure, 4 mM	0.72292	0.28958	0.901736	0.209028	0.408333	1.8594	0.884722	1.90556	0.133913	0.379167	0.155556	0.016667	0.136111	0.179167	0.231944	0.224826	0.303819	0.405903	1.02326	0.610069	0.083333	1.06944	1.01354	0.512847	0.712153	0.097222	0.323264	0.211458	1.86424	0.420486	0.746181	0.427778	0.157986	0.114236	0.731597	0.644444	0.296528	0.960069	0.148264	1.48993	1.35868	0.594277	0.515359			37	Amino acid Mixure, 4 mM	0.20991
38	Amino acid Mixure, 4 mM	0.63958	0.30417	0.855556	0.143403	0.376736	1.7524	0.617361	1.42431	0.097391	0.39375	0.184722	0.017014	0.107639	0.128472	0.156944	0.22309	0.337847	0.364583	0.843403	0.517708	0.066667	1.10104	1.05729	0.495833	0.653819	0.085069	0.311111	0.182292	1.93715	0.447222	0.665972	0.346528	0.123958	0.119097	0.665972	0.563889	0.272222	0.840972	0.133681	1.81563	1.30035	0.552972	0.50266			38	Amino acid Mixure, 4 mM	0.15467
39	Amino acid Mixure, 4 mM	0.59583	0.26458	0.840972	0.170139	0.323264	1.6212	0.517708	1.1934	0.112609	0.464236	0.179861	0.014931	0.113889	0.116667	0.172917	0.231424	0.30625	0.384028	0.731597	0.471528	0.140278	1.16667	0.986806	0.422917	0.692708	0.072917	0.269792	0.160417	1.75	0.330556	0.658681	0.352778	0.148264	0.058333	0.573611	0.511111	0.257639	0.909028	0.126389	1.0816	1.11319	0.5027	0.429402			39	Amino acid Mixure, 4 mM	0.15025
40	Amino acid Mixure, 4 mM	0.52708	0.24792	0.712153	0.138542	0.257639	1.6066	0.658681	1.39514	0.14	0.6125	0.196875	0.012153	0.133333	0.122917	0.18125	0.235069	0.250347	0.422917	0.729167	0.39375	0.147222	1.1691	1.01597	0.418056	0.678125	0.077778	0.277083	0.155556	1.94687	0.315972	1.10833	0.338194	0.119097	0.082639	0.520139	0.505556	0.281944	0.627083	0.153125	0.758333	1.07187	0.505905	0.448481			40	Amino acid Mixure, 4 mM	0.13037
41	Amino acid Mixure, 4 mM	0.56458	0.3	0.639236	0.121528	0.223611	1.5385	0.534722	1.3125	0.152174	0.512847	0.121528	0.019792	0.130556	0.114583	0.186806	0.229514	0.257639	0.493403	0.775347	0.490972	0.083333	1.20556	0.943056	0.379167	0.622222	0.094792	0.286806	0.138542	2.09271	0.313542	0.709722	0.311806	0.072917	0.085069	0.588194	0.594444	0.252778	0.916319	0.30625	0.741319	1.14479	0.502516	0.4504			41	Amino acid Mixure, 4 mM	0.1613
42	Amino acid Mixure, 4 mM	0.50833	0.28333	0.605208	0.104514	0.182292	1.6042	0.602778	1.31493	0.13087	0.605208	0.126389	0.015625	0.117361	0.11875	0.172222	0.260937	0.267361	0.539583	0.619792	0.495833	0.090278	1.05	0.972222	0.432639	0.6125	0.097222	0.298958	0.116667	1.8059	0.286806	0.819097	0.340278	0.048611	0.0875	0.529861	0.469444	0.238194	0.833681	0.140972	0.792361	1.19583	0.486208	0.431335			42	Amino acid Mixure, 4 mM	0.14141
43	Amino acid Mixure, 4 mM	0.48333	0.275	0.505556	0.126389	0.145833	1.5969	0.571181	1.23229	0.121739	0.597917	0.092361	0.015972	0.122222	0.126389	0.161111	0.21875	0.2625	0.539583	0.673264	0.520139	0.0875	1.01354	0.896875	0.405903	0.580903	0.082639	0.2625	0.114236	1.65278	0.279514	0.714583	0.277083	0.051042	0.085069	0.563889	0.483333	0.245486	0.906597	0.143403	0.607639	1.30278	0.466969	0.417862			43	Amino acid Mixure, 4 mM	0.15246
44	Amino acid Mixure, 4 mM	0.49167	0.28542	0.473958	0.111806	0.175	1.5653	0.447222	0.950347	0.103478	0.452083	0.109375	0.011458	0.127778	0.121528	0.088194	0.194792	0.267361	0.534722	0.738889	0.542014	0.066667	0.984375	0.930903	0.415625	0.554167	0.094792	0.289236	0.133681	1.56528	0.311111	0.755903	0.308333	0.106944	0.1	0.551736	0.513889	0.235764	0.933333	0.172569	0.588194	1.19583	0.453676	0.392837			44	Amino acid Mixure, 4 mM	0.14804
45	Amino acid Mixure, 4 mM	0.47917	0.25208	0.471528	0.119097	0.155556	1.2882	0.430208	0.879861	0.13087	0.512847	0.089931	0.014583	0.129167	0.130556	0.172917	0.289583	0.296528	0.520139	0.648958	0.495833	0.168056	0.967361	0.806944	0.39375	0.559028	0.085069	0.2625	0.138542	1.54583	0.269792	0.675694	0.402778	0.106944	0.104514	0.454514	0.530556	0.206597	0.782639	0.252778	1.02569	1.20799	0.450126	0.364927			45	Amino acid Mixure, 4 mM	0.13479
46	Amino acid Mixure, 4 mM	0.50625	0.30417	0.418056	0.143403	0.133681	1.2639	1.3684	0.882292	0.164348	0.454514	0.116667	0.013889	0.133333	0.118056	0.149306	0.193055	0.228472	0.668403	0.758333	0.444792	0.134722	1.00382	0.648958	0.347569	0.559028	0.065625	0.260069	0.114236	1.55313	0.204167	0.627083	0.304861	0.111806	0.106944	0.435069	0.461111	0.238194	0.712153	0.201736	1.07431	0.943056	0.45295	0.386927			46	Amino acid Mixure, 4 mM	0.12374
47	Amino acid Mixure, 4 mM	0.4125	0.32708	0.354861	0.075347	0.160417	1.1764	0.4375	0.879861	0.124783	0.466667	0.13125	0.016667	0.147222	0.123611	0.13125	0.229166	0.21875	0.616667	0.639236	0.403472	0.109722	0.994097	0.758333	0.35	0.546875	0.063194	0.226042	0.104514	1.41458	0.235764	0.758333	0.332639	0.048611	0.080208	0.432639	0.455556	0.177431	0.731597	0.226042	0.755903	0.943056	0.410191	0.33652			47	Amino acid Mixure, 4 mM	0.1149
48	Amino acid Mixure, 4 mM	0.41458	0.27917	0.303819	0.0875	0.123958	1.4267	0.488542	1.04271	0.237391	0.430208	0.0875	0.016319	0.179861	0.125	0.122917	0.185243	0.279514	0.680556	0.498264	0.461806	0.083333	0.906597	0.823958	0.359722	0.539583	0.080208	0.245486	0.102083	1.72569	0.240625	0.549306	0.320139	0.092361	0.114236	0.488542	0.516667	0.250347	0.675694	0.143403	0.678125	0.889583	0.421884	0.372238			48	Amino acid Mixure, 4 mM	0.12374
49	Amino acid Mixure, 4 mM	0.44375	0.275	0.281944	0.094792	0.119097	1.2444	0.430208	0.911458	0.164348	0.430208	0.072917	0.015625	0.141667	0.119444	0.115972	0.6125	0.233333	0.680556	0.539583	0.408333	0.079167	0.872569	0.719444	0.376736	0.527431	0.077778	0.233333	0.102083	1.48264	0.216319	0.56875	0.311806	0.070486	0.102083	0.381597	0.441667	0.2625	0.682986	0.13125	1.21042	0.840972	0.415296	0.353813			49	Amino acid Mixure, 4 mM	0.10606
50	Amino acid Mixure, 4 mM	0.42708	0.28542	0.308681	0.097222	0.128819	1.0281	0.354861	0.665972	0.07913	0.342708	0.119097	0.015278	0.096528	0.102083	0.089583	0.19757	0.255208	0.532292	0.546875	0.415625	0.088889	0.916319	0.729167	0.35	0.517708	0.097222	0.194444	0.102083	1.3125	0.240625	0.525	0.276389	0.238194	0.104514	0.534722	0.441667	0.277083	0.741319	0.114236	1.27604	0.702431	0.387041	0.322674			50	Amino acid Mixure, 4 mM	0.10385
51	Amino acid Mixure, 4 mM	0.40833	0.2875	0.311111	0.102083	0.099653	0.95764	0.369444	0.646528	0.124783	0.413194	0.0875	0.015625	0.1125	0.109722	0.134722	0.177952	0.21875	0.622222	0.486111	0.379167	0.179167	0.896875	0.661111	0.364583	0.527431	0.094792	0.206597	0.106944	1.18854	0.216319	0.539583	0.333333	0.121528	0.109375	0.515278	0.494444	0.216319	0.748611	0.126389	0.709722	0.714583	0.369172	0.279185			51	Amino acid Mixure, 4 mM	0.10606
52	Amino acid Mixure, 4 mM	0.38125	0.27708	0.286806	0.0875	0.104514	1.0281	0.35	0.624653	0.124783	0.398611	0.138542	0.018056	0.129167	0.120833	0.138194	0.1875	0.196875	0.520139	0.493403	0.364583	0.158333	0.884722	0.707292	0.342708	0.483681	0.089931	0.179861	0.092361	1.27604	0.216319	0.459375	0.334722	0.102083	0.082639	0.439931	0.572222	0.264931	0.648958	0.123958	0.889583	0.717014	0.366762	0.291535			52	Amino acid Mixure, 4 mM	0.099432
53	Amino acid Mixure, 4 mM	0.3625	0.27083	0.286806	0.102083	0.102083	1.0014	0.376736	0.588194	0.115652	0.289236	0.097222	0.018056	0.165972	0.120139	0.165278	0.201215	0.260069	0.517708	0.464236	0.359722	0.073611	0.777778	0.661111	0.352431	0.478819	0.082639	0.165278	0.085069	1.18368	0.194444	0.478819	0.334722	0.048611	0.092361	0.415625	0.466667	0.308681	0.65625	0.121528	1.44132	0.646528	0.364173	0.312979			53	Amino acid Mixure, 4 mM	0.090593
54	Amino acid Mixure, 4 mM	0.33958	0.26875	0.277083	0.077778	0.094792	1.0622	0.507986	0.682986	0.13087	0.364583	0.082639	0.018403	0.122917	0.104861	0.140278	0.218577	0.199306	0.627083	0.415625	0.352431	0.059722	0.736458	0.675694	0.359722	0.466667	0.097222	0.187153	0.104514	1.3125	0.233333	0.510417	0.302083	0.092361	0.089931	0.629514	0.525	0.245486	0.685417	0.157986	1.25417	0.695139	0.378273	0.319365			54	Amino acid Mixure, 4 mM	0.092803
55	Amino acid Mixure, 4 mM	0.34583	0.24792	0.289236	0.097222	0.094792	0.96979	0.515278	0.65625	0.143043	0.413194	0.063194	0.015625	0.113194	0.117361	0.118056	0.203819	0.223611	0.563889	0.442361	0.352431	0.0625	0.763194	0.6125	0.337847	0.454514	0.077778	0.160417	0.092361	1.17396	0.213889	0.427778	0.2875	0.068056	0.111806	0.512847	0.463889	0.204167	0.6125	0.140972	0.996528	0.56875	0.349508	0.280068			55	Amino acid Mixure, 4 mM	0.095013
56	Amino acid Mixure, 4 mM	0.32917	0.2875	0.230903	0.106944	0.075347	0.85069	0.296528	0.578472	0.118696	0.289236	0.097222	0.011458	0.083333	0.109028	0.082639	0.256076	0.2	0.430208	0.420486	0.332986	0.065278	0.753472	0.624653	0.311111	0.432639	0.058333	0.153125	0.085069	1.09618	0.189583	0.461806	0.342361	0.060764	0.082639	0.345139	0.394444	0.252778	0.580903	0.148264	1.17882	0.653819	0.328246	0.277279			56	Amino acid Mixure, 4 mM	0.099432
57	Amino acid Mixure, 4 mM	0.33125	0.27708	0.296528	0.094792	0.109375	0.82396	0.228472	0.425347	0.121739	0.277083	0.0875	0.013889	0.082639	0.102083	0.120139	0.186285	0.206597	0.464236	0.39375	0.315972	0.044444	0.755903	0.641667	0.291667	0.469097	0.075347	0.150694	0.063194	1.27604	0.172569	0.422917	0.305556	0.099653	0.116667	0.364583	0.355556	0.170139	0.580903	0.111806	1.50694	0.517708	0.328092	0.313307			57	Amino acid Mixure, 4 mM	0.083965
58	Amino acid Mixure, 4 mM	0.34792	0.27292	0.2625	0.082639	0.114236	0.89688	0.362153	0.539583	0.097391	0.294097	0.175	0.014583	0.086806	0.11875	0.163194	0.183854	0.153125	0.483681	0.4375	0.272222	0.090278	0.751042	0.561458	0.298958	0.452083	0.077778	0.172569	0.085069	1.13021	0.177431	0.364583	0.265972	0.184722	0.094792	0.308681	0.325	0.148264	0.563889	0.216319	0.872569	0.559028	0.31853	0.251214			58	Amino acid Mixure, 4 mM	0.095013
59	Amino acid Mixure, 4 mM	0.30833	0.26875	0.279514	0.0875	0.119097	0.83854	0.313542	0.546875	0.13087	0.313542	0.082639	0.012153	0.097222	0.113194	0.155556	0.183855	0.175	0.510417	0.442361	0.250347	0.036111	0.741319	0.527431	0.281944	0.471528	0.065625	0.148264	0.077778	1.12292	0.148264	0.35	0.322222	0.114236	0.114236	0.281944	0.341667	0.165278	0.546875	0.138542	0.486111	0.542014	0.298869	0.23602			59	Amino acid Mixure, 4 mM	0.13479
60	Amino acid Mixure, 4 mM	0.28125	0.275	0.221181	0.070486	0.106944	0.87986	0.473958	0.551736	0.146087	0.313542	0.080208	0.018403	0.098611	0.106944	0.11875	0.167708	0.187153	0.469097	0.318403	0.221181	0.070833	0.697569	0.597917	0.315972	0.386458	0.080208	0.162847	0.070486	1.21285	0.157986	0.35	0.323611	0.121528	0.089931	0.328125	0.336111	0.165278	0.600347	0.126389	0.544444	0.512847	0.30142	0.247965			60	Amino acid Mixure, 4 mM	0.068497
61	Amino acid Mixure, 4 mM + Glucose, 3 mM	0.3125	0.27083	0.243056	0.070486	0.092361	0.92604	0.340278	0.537153	0.127826	0.247917	0.068056	0.017708	0.090972	0.107639	0.095139	0.159896	0.167708	0.476389	0.340278	0.255208	0.055556	0.648958	0.561458	0.289236	0.347569	0.092361	0.160417	0.092361	1.11076	0.155556	0.352431	0.349306	0.121528	0.133681	0.298958	0.325	0.175	0.585764	0.150694	1.31979	0.493403	0.311396	0.28299			61	Amino acid Mixure, 4 mM + Glucose, 3 mM	0.10606
62	Amino acid Mixure, 4 mM + Glucose, 3 mM	0.28125	0.30208	0.233333	0.070486	0.077778	0.71458	0.308681	0.469097	0.14	0.303819	0.114236	0.011458	0.078472	0.089583	0.085417	0.171354	0.179861	0.418056	0.386458	0.238194	0.101389	0.617361	0.544444	0.335417	0.376736	0.102083	0.133681	0.0875	0.972222	0.162847	0.284375	0.326389	0.332986	0.104514	0.30625	0.283333	0.194444	0.602778	0.114236	1.15208	0.444792	0.298879	0.24295			62	Amino acid Mixure, 4 mM + Glucose, 3 mM	0.072917
63	Amino acid Mixure, 4 mM + Glucose, 3 mM	0.24792	0.2375	0.230903	0.089931	0.092361	0.75104	0.359722	0.410764	0.13087	0.376736	0.209028	0.010417	0.169444	0.147222	0.166667	0.238889	0.332986	0.537153	0.469097	0.493403	0.051389	0.770486	0.731597	0.401042	0.583333	0.092361	0.167708	0.092361	1.05729	0.192014	0.639236	0.35625	2.53993	0.143403	0.432639	0.461111	0.233333	1.38785	0.167708	1.38542	0.823958	0.449085	0.469812			63	Amino acid Mixure, 4 mM + Glucose, 3 mM	0.070707
64	Amino acid Mixure, 4 mM + Glucose, 3 mM	0.28542	0.25208	0.226042	0.082639	0.104514	0.72431	0.354861	0.517708	0.173478	0.950347	0.303819	0.014236	0.366667	0.269444	0.226389	0.258333	0.335417	0.738889	0.697569	0.865278	0.1125	1.1691	1.00382	0.627083	0.74375	0.116667	0.30625	0.119097	1.47292	0.340278	1.19583	0.522917	1.87396	0.216319	0.770486	0.761111	0.303819	1.66493	0.223611	1.50451	1.38299	0.589741	0.484335			64	Amino acid Mixure, 4 mM + Glucose, 3 mM	0.081755
65	Amino acid Mixure, 4 mM + Glucose, 3 mM	0.31042	0.24792	0.226042	0.077778	0.119097	0.92604	0.313542	0.452083	0.161304	0.972222	0.272222	0.014236	0.3375	0.302778	0.236806	0.276042	0.388889	0.7875	0.935764	0.877431	0.094444	1.14236	0.887153	0.658681	0.906597	0.099653	0.425347	0.138542	1.63576	0.4375	1.1059	0.684028	0.913889	0.172569	0.673264	0.966667	0.909028	1.575	0.25	1.43646	1.57743	0.607949	0.456474			65	Amino acid Mixure, 4 mM + Glucose, 3 mM	0.072917
66	Amino acid Mixure, 4 mM + Glucose, 3 mM	0.36875	0.26458	0.238194	0.094792	0.102083	1.2687	0.444792	0.493403	0.158261	0.819097	0.189583	0.016667	0.255556	0.250694	0.339583	0.262848	0.337847	0.83125	0.74375	0.631944	0.1	1.10347	0.775347	0.614931	0.729167	0.121528	0.277083	0.128819	1.40972	0.466667	0.843403	0.68125	0.792361	0.184722	0.634375	0.869444	0.255208	1.25417	0.194444	1.50694	1.15451	0.541706	0.400981			66	Amino acid Mixure, 4 mM + Glucose, 3 mM	0.10385
67	Amino acid Mixure, 4 mM + Glucose, 3 mM	0.34167	0.27083	0.240625	0.0875	0.126389	1.4194	0.398611	0.4375	0.161304	0.617361	0.184722	0.016667	0.182639	0.180556	0.331944	0.256076	0.298958	0.741667	0.690278	0.505556	0.109722	0.986806	0.704861	0.721875	0.838542	0.133681	0.264931	0.128819	1.2566	0.442361	0.717014	0.703472	0.648958	0.17	0.658681	0.658333	0.260069	1.09618	0.201736	1.54583	0.83125	0.501707	0.376643			67	Amino acid Mixure, 4 mM + Glucose, 3 mM	0.15909
68	Amino acid Mixure, 4 mM + Glucose, 3 mM	0.38333	0.30625	0.255208	0.089931	0.121528	1.1642	0.357292	0.376736	0.14	0.364583	0.21875	0.011111	0.117361	0.130556	0.342361	0.245312	0.303819	0.802083	0.734028	0.525	0.094444	1.04028	0.695139	0.836111	0.838542	0.123958	0.272222	0.162847	1.17153	0.459375	0.590625	0.805556	0.539583	0.16	0.571181	0.552778	0.281944	1.2	0.206597	1.40486	0.738889	0.481363	0.357646			68	Amino acid Mixure, 4 mM + Glucose, 3 mM	0.12153
69	Amino acid Mixure, 4 mM + Glucose, 3 mM	0.39375	0.28958	0.250347	0.109375	0.148264	1.1326	0.388889	0.335417	0.170435	0.427778	0.204167	0.014236	0.140972	0.1125	0.328472	0.260416	0.330556	0.6125	0.894444	0.488542	0.080556	0.998958	0.663542	0.74375	0.9	0.123958	0.255208	0.194444	1.14479	0.478819	0.602778	0.7375	0.549306	0.177431	0.542014	0.45	0.269792	1.1375	0.201736	1.80347	0.785069	0.484728	0.377918			69	Amino acid Mixure, 4 mM + Glucose, 3 mM	0.090593
70	Amino acid Mixure, 4 mM + Glucose, 3 mM	0.3875	0.30208	0.177431	0.104514	0.138542	1.0573	0.56875	0.442361	0.188696	0.469097	0.281944	0.014931	0.120833	0.115278	0.352778	0.280729	0.267361	0.634375	1.02326	0.415625	0.109722	1.01597	0.661111	0.734028	0.819097	0.133681	0.269792	0.21875	1.2566	0.512847	0.729167	0.870139	0.444792	0.172569	0.410764	0.463889	0.281944	1.15451	0.162847	1.55799	1.08889	0.497866	0.376214			70	Amino acid Mixure, 4 mM + Glucose, 3 mM	0.11711
71	Amino acid Mixure, 4 mM + Glucose, 3 mM	0.38958	0.3125	0.243056	0.089931	0.153125	1.3222	0.425347	0.495833	0.161304	0.527431	0.264931	0.013889	0.113889	0.114583	0.360417	0.257986	0.279514	0.748611	1.0816	0.522569	0.2	0.984375	0.636806	0.636806	0.731597	0.123958	0.281944	0.260069	1.19583	0.466667	0.734028	0.802083	0.478819	0.145833	0.500694	0.472222	0.332986	1.22014	0.179861	1.67708	0.734028	0.504247	0.381578			71	Amino acid Mixure, 4 mM + Glucose, 3 mM	0.10827
72	Amino acid Mixure, 4 mM + Glucose, 3 mM	0.4	0.32083	0.204167	0.138542	0.143403	1.2542	0.439931	0.456944	0.191739	0.670833	0.315972	0.017361	0.130556	0.129861	0.309028	0.240798	0.320833	0.695139	0.909028	0.517708	0.118056	0.875	0.704861	0.595486	0.665972	0.133681	0.296528	0.230903	1.11563	0.442361	0.704861	0.744444	0.427778	0.145833	0.444792	0.597222	0.252778	1.19583	0.170139	1.21771	0.789931	0.479919	0.333345			72	Amino acid Mixure, 4 mM + Glucose, 3 mM	0.1392
73	Amino acid Mixure, 4 mM + Glucose, 3 mM	0.39583	0.31458	0.194444	0.089931	0.175	1.4146	0.534722	0.410764	0.164348	0.561458	0.303819	0.019792	0.127083	0.133333	0.134028	0.290278	0.245486	0.680556	0.996528	0.507986	0.138889	0.857986	0.622222	0.532292	0.627083	0.123958	0.255208	0.228472	1.00868	0.444792	0.622222	0.75	0.452083	0.102083	0.488542	0.583333	0.279514	1.27118	0.150694	1.40972	0.726736	0.472445	0.357942			73	Amino acid Mixure, 4 mM + Glucose, 3 mM	0.15246
74	Amino acid Mixure, 4 mM + Glucose, 3 mM	0.4375	0.32917	0.196875	0.106944	0.162847	1.2031	0.405903	0.325694	0.158261	0.512847	0.289236	0.013194	0.113194	0.115972	0.254167	0.220139	0.255208	0.561458	0.952778	0.488542	0.077778	0.911458	0.668403	0.525	0.554167	0.126389	0.260069	0.230903	1.00382	0.427778	0.641667	0.688194	0.449653	0.123958	0.447222	0.530556	0.247917	1.27847	0.150694	1.57257	0.772917	0.458356	0.356595			74	Amino acid Mixure, 4 mM + Glucose, 3 mM	0.10164
75	Amino acid Mixure, 4 mM + Glucose, 3 mM	0.37292	0.31667	0.221181	0.068056	0.162847	1.0816	0.39375	0.35	0.173478	0.7	0.345139	0.0125	0.135417	0.127083	0.269444	0.22934	0.245486	0.554167	0.838542	0.425347	0.097222	0.906597	0.639236	0.483681	0.563889	0.136111	0.250347	0.182292	1.03299	0.422917	0.563889	0.638194	0.454514	0.111806	0.473958	0.444444	0.223611	1.27604	0.153125	1.33681	0.741319	0.442828	0.329183			75	Amino acid Mixure, 4 mM + Glucose, 3 mM	0.12374
76	Amino acid Mixure, 4 mM + Glucose, 3 mM	0.38542	0.325	0.211458	0.075347	0.172569	0.92361	0.384028	0.345139	0.170435	0.522569	0.328125	0.013889	0.165278	0.136806	0.222917	0.248958	0.213889	0.619792	0.816667	0.388889	0.086111	0.940625	0.551736	0.430208	0.595486	0.089931	0.233333	0.177431	1.00139	0.381597	0.515278	0.609722	0.379167	0.126389	0.444792	0.366667	0.247917	1.16181	0.177431	0.736458	0.714583	0.405825	0.279331			76	Amino acid Mixure, 4 mM + Glucose, 3 mM	0.1613
77	Amino acid Mixure, 4 mM + Glucose, 3 mM	0.38958	0.3375	0.172569	0.072917	0.165278	1.0865	0.464236	0.367014	0.173478	0.797222	0.318403	0.019444	0.1	0.125	0.214583	0.24566	0.209028	0.651389	0.714583	0.354861	0.083333	0.913889	0.554167	0.510417	0.505556	0.099653	0.252778	0.175	0.989236	0.362153	0.6125	0.552778	0.303819	0.114236	0.388889	0.522222	0.320833	1.21042	0.155556	1.54097	0.675694	0.434716	0.340135			77	Amino acid Mixure, 4 mM + Glucose, 3 mM	0.16351
78	Amino acid Mixure, 4 mM + Glucose, 3 mM	0.35	0.35625	0.162847	0.051042	0.165278	1.1569	0.396181	0.374306	0.170435	0.600347	0.277083	0.020486	0.115972	0.1375	0.222222	0.231597	0.247917	0.572222	0.661111	0.403472	0.115278	0.826389	0.6125	0.500694	0.415625	0.106944	0.257639	0.175	0.838542	0.35	0.595486	0.566667	0.352431	0.126389	0.430208	0.486111	0.357292	1.25903	0.235764	1.49722	0.668403	0.425531	0.32523			78	Amino acid Mixure, 4 mM + Glucose, 3 mM	0.15467
79	Amino acid Mixure, 4 mM + Glucose, 3 mM	0.36458	0.35833	0.196875	0.082639	0.133681	1.0476	0.505556	0.362153	0.170435	0.639236	0.364583	0.015972	0.100694	0.116667	0.133333	0.230382	0.238194	0.670833	0.682986	0.401042	0.091667	0.811806	0.544444	0.476389	0.48125	0.099653	0.216319	0.157986	0.923611	0.35	0.534722	0.601389	0.320833	0.119097	0.456944	0.463889	0.466667	1.24444	0.209028	0.906597	0.678125	0.413918	0.289149			79	Amino acid Mixure, 4 mM + Glucose, 3 mM	0.13699
80	Amino acid Mixure, 4 mM + Glucose, 3 mM	0.34375	0.40625	0.167708	0.075347	0.136111	0.92847	0.376736	0.332986	0.164348	0.427778	0.318403	0.011806	0.096528	0.1125	0.178472	0.20625	0.267361	0.422917	0.588194	0.396181	0.098611	0.875	0.563889	0.469097	0.422917	0.123958	0.235764	0.165278	0.896875	0.335417	0.658681	0.6125	0.315972	0.111806	0.376736	0.361111	0.238194	1.02812	0.21875	1.28576	0.663542	0.390636	0.287719			80	Amino acid Mixure, 4 mM + Glucose, 3 mM	0.13037
81	Amino acid Mixure, 4 mM + Glucose, 16.7 mM	0.33542	0.37083	0.221181	0.099653	0.148264	0.99896	0.420486	0.313542	0.155217	0.405903	0.30625	0.013194	0.100694	0.129861	0.145139	0.217882	0.226042	0.497222	0.629514	0.413194	0.101389	0.802083	0.573611	0.449653	0.442361	0.138542	0.240625	0.167708	0.957639	0.369444	0.510417	0.604167	0.311111	0.140972	0.359722	0.336111	0.226042	1.14479	0.182292	1.56042	0.636806	0.400106	0.317934			81	Amino acid Mixure, 4 mM + Glucose, 16.7 mM	0.11932
82	Amino acid Mixure, 4 mM + Glucose, 16.7 mM	0.39062	0.39062	0.229167	0.15625	0.119792	1.0729	0.572917	0.4375	0.273913	0.5625	0.489583	0.013542	0.111806	0.124306	0.128472	0.240104	0.244792	0.604167	0.744792	0.421875	0.135417	1.04688	0.609375	0.432292	0.526042	0.114583	0.265625	0.197917	0.979167	0.411458	0.661458	0.513889	0.3125	0.114583	0.385417	0.311111	0.25	3.69271	0.302083	1.54167	0.895833	0.512918	0.599974			82	Amino acid Mixure, 4 mM + Glucose, 16.7 mM	0.15625
83	Amino acid Mixure, 4 mM + Glucose, 16.7 mM	0.35937	0.51562	0.182292	0.104167	0.177083	1.1979	0.390625	0.640625	0.293478	1.29688	0.578125	0.052778	0.4125	0.261806	0.534722	0.329514	0.489583	0.723958	4.02604	1.91146	0.145833	2.64583	1.88542	1.45833	3.23438	0.484375	0.947917	0.755208	1.73438	1.48438	2.30729	1.1625	0.260417	0.286458	0.588542	0.583333	0.375	3.90104	0.598958	1.32292	3.21354	1.06962	1.0525			83	Amino acid Mixure, 4 mM + Glucose, 16.7 mM	0.17992
84	Amino acid Mixure, 4 mM + Glucose, 16.7 mM	0.56771	0.39062	0.291667	0.125	0.119792	1.1823	0.307292	1.84375	0.795652	5.01042	1.33854	0.192361	0.352083	0.866667	1.38889	0.515104	1.11458	2.58854	8.27083	8	0.53125	4.07292	4.67708	4.64583	6.17708	2.27083	4.02604	3.9375	3.35417	7.01562	7.08854	4.71944	0.375	0.578125	3.54688	2.75556	2.13021	8.97917	0.630208	1.8125	10.4167	2.9025	2.81695			84	Amino acid Mixure, 4 mM + Glucose, 16.7 mM	0.17519
85	Amino acid Mixure, 4 mM + Glucose, 16.7 mM	0.99479	0.52604	0.213542	0.125	0.177083	1.2292	0.588542	2.61458	1.03696	6.27604	2.01562	0.240972	2.29167	0.970833	1.38889	1.075	1.29167	3.60938	10.1458	9.28125	0.579861	3.35938	4.51562	6.05729	4.33333	1.86458	4.14062	4.59896	4.01562	9.53125	8	5.55556	0.661458	0.567708	5.20833	2.93333	3.40625	7.89062	0.552083	4.47917	8.39583	3.33512	2.93236			85	Amino acid Mixure, 4 mM + Glucose, 16.7 mM	0.15152
86	Amino acid Mixure, 4 mM + Glucose, 16.7 mM	1.776	1.0885	0.229167	0.630208	1.04167	1.6094	0.520833	2.65104	0.873913	4.46875	2.28125	0.173611	1.47083	0.75	1.38889	1.36094	1.07292	3.5	9.90625	7.59896	0.423611	2.92708	3.59896	4.53125	3.15104	1	2.99479	3.94271	3.57292	6.42188	6.66146	3.80278	0.911458	0.40625	5.19271	2.27222	2.52604	5.79688	0.515625	2.93056	8.67708	2.84513	2.41558			86	Amino acid Mixure, 4 mM + Glucose, 16.7 mM	0.40246
87	Amino acid Mixure, 4 mM + Glucose, 16.7 mM	1.7969	1.1354	0.255208	1.5	3.25	3.5469	1.33333	2.9375	0.678261	3.53646	2.02604	0.148958	0.995833	0.458333	1.38889	1.4625	0.697917	2.48438	7.25	4.71354	0.333333	2.46354	3.04167	3.11979	2.33854	0.677083	2.3125	2.53125	3.25	4.70312	5.34896	4.21389	0.947917	0.354167	3.47917	2.26667	1.77083	6.1875	0.40625	2.55556	5.97917	2.43603	1.76715			87	Amino acid Mixure, 4 mM + Glucose, 16.7 mM	1.3636
88	Amino acid Mixure, 4 mM + Glucose, 16.7 mM	1.7135	1.0313	0.416667	0.947917	2.71875	4.9479	1.98958	3.82292	0.554348	3.20833	2.17188	0.140625	0.879167	0.445833	1.27014	1.30208	0.661458	2.2	6.10417	4.42188	0.427083	2.65625	2.40625	3.51562	2.32812	0.661458	2.16146	2.23438	2.33854	4.01562	4.07292	3.81667	0.96875	0.296875	2.98958	1.40556	1.3125	5.21354	0.359375	10.4167	4.52604	2.41638	2.00908			88	Amino acid Mixure, 4 mM + Glucose, 16.7 mM	2.2348
89	Amino acid Mixure, 4 mM + Glucose, 16.7 mM	1.4688	0.9375	0.838542	0.65625	1.93229	4.974	2.16146	4.08854	0.580435	3.04167	2.19271	0.144792	0.854167	0.4	1.20556	1.20469	0.494792	1.78889	4.89062	3.82292	0.392361	2.82812	2.33854	3.1875	2.33333	0.671875	2.16667	1.91146	2.44792	4.25521	4.63542	3.11111	0.703125	0.333333	2.375	1.32778	1.13021	5.22917	0.380208	10.3906	5.16667	2.31693	1.99281			89	Amino acid Mixure, 4 mM + Glucose, 16.7 mM	1.9839
90	Amino acid Mixure, 4 mM + Glucose, 16.7 mM	1.1667	0.94792	1.48958	0.4375	1.53125	5.0208	2.20312	4.71354	0.626087	2.97396	1.69271	0.159375	0.9375	0.491667	1.24097	1.09896	0.557292	2.46354	4.07292	3.89062	0.368056	2.83333	2.51042	3.18229	2.55729	0.901042	2.39062	1.80729	2.55729	4.5625	4.26042	3.45556	0.53125	0.328125	2.17188	1.25556	1.15625	6.74479	0.505208	8.38021	3.99479	2.29683	1.84004			90	Amino acid Mixure, 4 mM + Glucose, 16.7 mM	1.8703
91	Amino acid Mixure, 4 mM + Glucose, 16.7 mM	1.1927	0.94271	2.08333	0.453125	1.125	4.8177	2.01042	4.86458	0.63913	3.31771	1.71354	0.164236	1.08333	0.433333	1.38056	1.02708	0.515625	2.01042	4.05729	4.24479	0.284722	3.00521	2.53125	2.82812	2.57292	0.869792	2.35417	1.82292	2.46354	4.82292	4.47396	3.22222	0.541667	0.380208	2.17188	1.49444	1.46875	5.90625	0.458333	4.54167	3.90625	2.19995	1.56613			91	Amino acid Mixure, 4 mM + Glucose, 16.7 mM	1.411
92	Amino acid Mixure, 4 mM + Glucose, 16.7 mM	1.125	0.97917	2.17188	0.567708	1.01042	3.4583	1.54167	3.60938	0.554348	2.56771	1.85417	0.147917	0.754167	0.370833	1.02986	1.25573	0.53125	1.69792	4.22917	4.99479	0.284722	2.96875	2.88021	3.57812	2.69271	0.96875	2.375	1.84375	2.17708	4.72917	5.18229	3.34722	0.604167	0.364583	2.05208	1.33333	1.20312	5	0.416667	5.03125	4.40104	2.14355	1.55839			92	Amino acid Mixure, 4 mM + Glucose, 16.7 mM	1.3258
93	Amino acid Mixure, 4 mM + Glucose, 16.7 mM	1.1302	1.0729	2.30208	0.614583	1.24479	2.974	1.70312	3.94792	0.63913	3.30208	1.80208	0.168056	0.941667	0.3875	1.26597	1.11354	0.640625	1.89444	4.32812	5.17188	0.46875	3.10417	2.97917	3.56771	2.65104	0.942708	2.55208	1.79167	2.52604	4.85938	5.26562	3.73611	0.552083	0.338542	2.01042	1.30556	1.13021	5.8125	0.552083	7.29688	4.55208	2.30828	1.75184			93	Amino acid Mixure, 4 mM + Glucose, 16.7 mM	1.5152
94	Amino acid Mixure, 4 mM + Glucose, 16.7 mM	1.3021	0.98958	2.32292	0.609375	1.29688	3.8958	1.69271	4.31771	0.743478	3.66146		0.182986	1.08333	0.45	1.22569	1.15417	0.541667	2.09896	4.58854	4.69792	0.607639	3.28125	2.69271	3.54167	2.72396	0.984375	2.44271	1.73958	2.01562	4.82292	4.41667	4.025	0.729167	0.354167	2.63542	1.35	1.10938	5.67708	0.682292	6.83333	4.5625	2.35207	1.70784			94	Amino acid Mixure, 4 mM + Glucose, 16.7 mM	1.4299
95	Amino acid Mixure, 4 mM + Glucose, 16.7 mM	1.2292	1.0052	2.16667	0.5625	1.47396	4.0937	1.66667	3.73958	0.678261	3.92188	1.79167	0.192361	0.916667	0.458333	1.11667	1.13698	0.598958	1.80208	4.63021	4.77083	0.329861	3.41146	2.75521	3.53125	2.70833	0.932292	2.47396	1.8125	2.34896	4.65104	4.51042	4.38611	0.567708	0.40625	2.47396	1.48333	1.17188	5.96875	0.6875	8.75521	4.58854	2.38797	1.87115			95	Amino acid Mixure, 4 mM + Glucose, 16.7 mM	1.5246
96	Amino acid Mixure, 4 mM + Glucose, 16.7 mM	1.0833	1.3021	2.1875	0.546875	1.29167	4.6562	1.625	4.15625	0.821739	3.90625	1.46354	0.214931	0.8875	0.554167	1.24167	1.03802	0.619792	2.08333	3.81771	5.74479	0.479167	3.15625	2.47396	3.65625	2.56771	0.916667	2.36979	1.82812	3.01562	5.09896	5.91146	3.75278	0.583333	0.3125	2.53125	1.32778	1.21875	6.05208	0.510417	5.51042	4.69271	2.37093	1.76382			96	Amino acid Mixure, 4 mM + Glucose, 16.7 mM	1.7282
97	Amino acid Mixure, 4 mM + Glucose, 16.7 mM	1.0833	1.1719	2.16146	0.614583	1.41146	4.6667	1.65104	3.63542	0.697826	4.375	1.69792	0.234722	0.933333	0.5	0.940278	1.03281	0.630208	2.07292	4.17188	5.26562	0.28125	3.19792	2.92708	3.82292	2.73958	0.963542	2.41667	1.85417	2.35938	5.52083	4.69792	3.83611	0.755208	0.34375	2.48958	1.41667	1.65104	6.45312	0.453125	9.06771	5.65104	2.48407	2.00895			97	Amino acid Mixure, 4 mM + Glucose, 16.7 mM	1.8513
98	Amino acid Mixure, 4 mM + Glucose, 16.7 mM	1.1927	1.2708	2.1875	0.609375	1.39583	3.9062	1.92708	3.17708	0.769565	3.41146	1.75521	0.199306	0.908333	0.383333	1.16042	1.0651	0.635417	2.03125	4.30729	6.05729	0.239583	3.44271	2.85938	3.79688	2.53646	0.973958	2.98958	1.75521	2.4375	5.42188	5.10417	3.69167	0.625	0.328125	2.67708	1.36111	1.7	5.97396	0.442708	7.53646	5.13542	2.42389	1.8526			98	Amino acid Mixure, 4 mM + Glucose, 16.7 mM	1.5578
99	Amino acid Mixure, 4 mM + Glucose, 16.7 mM	1.1667	1.25	2.07812	0.692708	1.58854	3.7917	1.74479	2.94792	0.763043	3.20833	1.68229	0.19375	1.20833	0.5	1.38889	1.08594	0.625	2.03646	4.74479	5.97917	0.260417	3.45312	3.02604	3.47917	2.79688	1.09896	2.79688	1.96354	2.57812	5.42188	5.17188	3.71944	0.671875	0.322917	2.28646	1.47222	1.55729	6.5	0.4375	5.59896	5.35938	2.40608	1.75953			99	Amino acid Mixure, 4 mM + Glucose, 16.7 mM	1.8939
100	Amino acid Mixure, 4 mM + Glucose, 16.7 mM	1.0677	1.25	2.02604	0.708333	1.55729	4.5573	2.11458	3.34896	0.854348	4.30729	1.8125	0.226389	1.0125	0.483333	1.38889	1.08906	0.619792	2.09375	4.53125	5.65104	0.253472	3.71354	2.6875	4.22396	2.97396	1.08333	2.91667	1.94792	2.64583	5.41667	6.21354	4.85278	0.614583	0.307292	2.73438	1.45	1.42188	6.39062	0.390625	7.17188	5.66146	2.57981	1.96109			100	Amino acid Mixure, 4 mM + Glucose, 16.7 mM	1.5483
101	Amino acid Mixure, 4 mM + Glucose, 16.7 mM + IBMX, 0.1 mM	1.2813	1.2865	2.10417	0.692708	1.57292	4.5104	2.125	2.85417	0.821739	4.33333	1.73958	0.224653	0.883333	0.395833	2.32917	1.14635	0.598958	2.16667	4.60938	6.04167	0.21875	3.74479	3.16146	3.78646	2.90104	1.17188	3.20833	1.98958	2.52604	5.28125	5.07812	4.15417	0.661458	0.416667	2.81771	1.51667	1.6	6.84375	0.526042	7.79167	5.4375	2.59881	1.93873			101	Amino acid Mixure, 4 mM + Glucose, 16.7 mM + IBMX, 0.1 mM	1.5294
102	Amino acid Mixure, 4 mM + Glucose, 16.7 mM + IBMX, 0.1 mM	1.2344	1.349	1.93229	0.723958	1.47917	4.9219	2.80729	3.11458	0.854348	4.10938	1.42188	0.282292	0.983333	0.445833	2.04167	1.02812	0.59375	2.38021	4.89583	6.30208	0.295139	3.91667	3.26562	3.6875	2.71354	1.21875	3.0625	1.92188	2.75	5.86979	5.57292	4.4125	0.583333	0.359375	3.29167	1.45556	1.55729	7.3125	0.458333	7.35417	4.89583	2.65503	2.00082			102	Amino acid Mixure, 4 mM + Glucose, 16.7 mM + IBMX, 0.1 mM	1.8229
103	Amino acid Mixure, 4 mM + Glucose, 16.7 mM + IBMX, 0.1 mM	1.224	1.3906	1.83333	0.682292	1.52083	4.4219	2.89062	3.50521	1.17391	5.60417	2.11458	0.389931	1.375	0.6	2.56667	1.31458	1.03646	2.86979	7.58333	7.98958	0.392361	4.58333	3.75	5.27083	3.65104	2.02604	3.43229	2.5	4.08333	8.16667	7.88021	5.2875	0.880208	0.364583	5.11458	1.81111	3.42708	8.89062	0.630208	7	5.91146	3.34488	2.48518			103	Amino acid Mixure, 4 mM + Glucose, 16.7 mM + IBMX, 0.1 mM	1.9981
104	Amino acid Mixure, 4 mM + Glucose, 16.7 mM + IBMX, 0.1 mM	1.8906	1.6406	1.875	0.739583	1.34375	4.375	1.84896	4.15625	1.53913	5.76042	2.71354	0.44375	1.3625	0.716667	2.28333	1.57187	1.42188	3.80729	9.72396	11.4938	0.59375	6.43229	4.47396	5.43229	6.26562	3.53646	5.00521	3.73438	5.23958	8.1875	7.28646	7.65417	1.44792	0.520833	5.59896	2.75556	6.17188	9.44792	1.27604	6.99306	8.66667	4.08362	2.94571			104	Amino acid Mixure, 4 mM + Glucose, 16.7 mM + IBMX, 0.1 mM	1.9366
105	Amino acid Mixure, 4 mM + Glucose, 16.7 mM + IBMX, 0.1 mM	2.599	1.7292	1.56771	0.880208	2.14062	4.6094	2.14583	4.54167	1.66304	7.42708	3.08333	0.616319	1.6625	0.879167	3.25833	2.2125	1.72917	6.81771	8.73958	11.6562	0.885417	7.82292	4.84896	6.58333	7	4.36458	5.73958	3.47917	5.48958	11.5625	8.60938	7.14583	2.31771	0.510417	5.0625	2.84444	5.57292	10.2344	1.84896	7.52778	8.94271	4.59394	3.13646			105	Amino acid Mixure, 4 mM + Glucose, 16.7 mM + IBMX, 0.1 mM	2.3437
106	Amino acid Mixure, 4 mM + Glucose, 16.7 mM + IBMX, 0.1 mM	2.8229	2.1927	1.45312	1.02604	3.13542	4.7812	2.50521	4.07812	1.62391	8.03646	3.54688	0.703125	1.89167	1.29167	4.14583	2.40208	1.53125	5.94792	9.11979	10.125	1.06597	9.36458	5.82812	5.72396	7.66667	4.41667	5.03125	3.34375	6.93229	13.8889	8.53472	9.5	2.09375	0.604167	5.27083	3.1	5.26562	9.34375	1.29167	7.74306	9.09722	4.81627	3.27238			106	Amino acid Mixure, 4 mM + Glucose, 16.7 mM + IBMX, 0.1 mM	3.2055
107	Amino acid Mixure, 4 mM + Glucose, 16.7 mM + IBMX, 0.1 mM	3.1458	2.651	2.32812	0.838542	4.64583	6.4844	5.16146	3.77083	1.64348	8.26042	3.41667	0.729167	1.725	1.4625	3.9375	2.17396	1.5625	5.5	9.44271	9.33854	1.02778	9.53125	5.16667	5.04167	8.92188	4.83854	5.22396	3.125	5.88021	13.2917	10.1927	10.8611	2.07812	0.578125	5.93229	2.96667	4.47396	10.125	1.16667	7.52778	9.72917	5.02192	3.36202			107	Amino acid Mixure, 4 mM + Glucose, 16.7 mM + IBMX, 0.1 mM	3.3333
108	Amino acid Mixure, 4 mM + Glucose, 16.7 mM + IBMX, 0.1 mM	3.4844	2.6719	6.10938	1.22396	4.73958	9.9115	4.10938	4.34896	1.67609	8.64062	2.64062	0.800347	1.51667	1.51667	4.3375	2.17083	1.52604	5.24479	9.17188	10.4167	1	8.58333	5.67188	6.42708	8.45312	4.88542	5.21354	3.01562	5.84896	13.8889	9.42708	10.0278	1.95833	0.713542	5.79688	3.07778	4.94271	10.3542	1.34375	9.59722	10.1875	5.28469	3.45789			108	Amino acid Mixure, 4 mM + Glucose, 16.7 mM + IBMX, 0.1 mM	4.0104
109	Amino acid Mixure, 4 mM + Glucose, 16.7 mM + IBMX, 0.1 mM	3.7344	2.7083	7.75521	1.78646	3.5625	9.9062	4.38021	3.84375	1.49348	6.65625	2.78125	0.569444	1.61667	1.33333	3.15	2.07552	1.46875	4.86458	8.97396	10.3177	1.14236	8.66667	5.73438	5.74479	10.4167	3.97396	4.78125	3.09375	6.25	10.6528	10.8194	11.1111	2.09375	0.713542	5.95833	3.13889	4.91146	10.25	1.20312	9.06944	11.0278	5.21296	3.45721			109	Amino acid Mixure, 4 mM + Glucose, 16.7 mM + IBMX, 0.1 mM	3.8305
110	Amino acid Mixure, 4 mM + Glucose, 16.7 mM + IBMX, 0.1 mM	3.5521	3.1354	6.90625	2.21354	4.86458	6.9219	4.40625	3.29167	1.61087	6.27604	2.875	0.637153	1.425	1.26667	2.95833	2.14167	1.60938	3.80208	8.57292	10.3438	1.11458	8.57812	5.44792	7.20833	7.98438	4.90104	5.58854	3.33854	6.59375	11.6597	6.59028	9.64444	2.21354	0.630208	5.89583	3.15556	4.83333	12	1.46875	8	11.1597	5.04432	3.199			110	Amino acid Mixure, 4 mM + Glucose, 16.7 mM + IBMX, 0.1 mM	3.9583
111	Amino acid Mixure, 4 mM + Glucose, 16.7 mM + IBMX, 0.1 mM	4.0937	2.9115	6.95312	2.29167	5.01562	8.5781	4.30208	3.5625	1.54565	6.96875	3.02604	0.586806	1.55417	1.32917	3.3625	2.17344	1.57292	4.28125	9.83333	11	1.03472	9.23958	5.73438	7.01042	8.15104	4.73958	5.32292	3.50521	6.90625	11.2292	10.1875	7.78333	2.21354	0.739583	6.66667	3.23889	4.78125	13.3333	1.375	8.34722	10.3681	5.28902	3.38099			111	Amino acid Mixure, 4 mM + Glucose, 16.7 mM + IBMX, 0.1 mM	3.5795
112	Amino acid Mixure, 4 mM + Glucose, 16.7 mM + IBMX, 0.1 mM	4.6719	3.0625	7.46354	2.41667	4.625	10.208	6.96354	3.60417	1.76739	8.14062	3.625	0.654514	1.5875	1.30833	3.57917	2.15052	1.4375	4.125	9.77604	9.20312	1.07292	9.08854	5.70833	7.375	8.375	4.84375	5.39062	3.35417	6.84896	11.1181	7.88542	8.6	1.96875	0.713542	6.35417	3.03333	4.61979	13.1319	1.35417	8.98611	11.7778	5.41391	3.40011			112	Amino acid Mixure, 4 mM + Glucose, 16.7 mM + IBMX, 0.1 mM	3.9631
113	Amino acid Mixure, 4 mM + Glucose, 16.7 mM + IBMX, 0.1 mM	4.1042	3.0885	8.56771	2.32292	5.24479	9.9583	5.45833	3.72917	1.65652	7.11979	3.48958	0.776042	1.78333	1.50833	3.38333	2.31562	1.44792	4.52083	10.2708	10.4167	1.23611	9.28125	5.59375	7	8.80208	3.69271	5.94792	3.39583	5.54688	13.6181	9.45833	6.21111	1.90104	0.6875	6.47396	2.97222	4.34375	13.0972	1.56771	10.25	8.86111	5.39271	3.49911			113	Amino acid Mixure, 4 mM + Glucose, 16.7 mM + IBMX, 0.1 mM	3.7358
114	Amino acid Mixure, 4 mM + Glucose, 16.7 mM + IBMX, 0.1 mM	5.0833	2.9792	8.36458	2.09375	4.73438	10.349	4.09896	4	1.79348	6.29167	3.4375	0.756944	1.7375	1.49167	3.72917	2.20052	1.38021	3.67188	9.10938	10.4167	1.14931	9.54688	4.29688	8.41667	9.20833	4.70833	5.82812	3.17708	6.53646	12.5139	10.0625	9.55	1.98958	0.84375	7.22396	3.71667	4.75521	12.6997	1.72396	10.1319	9.03472	5.48375	3.50321			114	Amino acid Mixure, 4 mM + Glucose, 16.7 mM + IBMX, 0.1 mM	4.4413
115	Amino acid Mixure, 4 mM + Glucose, 16.7 mM + IBMX, 0.1 mM	5.6875	2.9375	6.82292	2.35417	4.67188	9.1146	4.71354	3.70833	1.74783	6.30208	3.38542	0.597222	1.79167	1.28333	2.74167	2.38854	1.70312	4.48438	9.57292	10.4167	1.10069	7.95833	5.0625	6.32292	7.6875	4.91667	5.64583	3.59896	6.22917	11.1597	9.38889	9.27222	1.90104	0.786458	6.76042	3.85556	5.16146	12.8906	1.72396	9.59722	9.90625	5.30126	3.25605			115	Amino acid Mixure, 4 mM + Glucose, 16.7 mM + IBMX, 0.1 mM	3.7311
116	Amino acid Mixure, 4 mM + Glucose, 16.7 mM + IBMX, 0.1 mM	7.4219	3.151	7.47396	2.52604	4.47917	7.875	4.27604	3.32292	1.53913	6.86458	3.65104	0.652778	1.5875	1.09167	3.50833	2.14688	1.60417	4.07812	9.90625	12.125	1.14583	9.57812	6.0625	6	7.28646	4.72396	6.31771	3.72396	5.99479	13.8889	10.1719	7.92222	1.98438	0.78125	7.25	3.36667	5.32292	13.8889	1.28646	7.04688	9.68229	5.43189	3.5425			116	Amino acid Mixure, 4 mM + Glucose, 16.7 mM + IBMX, 0.1 mM	4.3655
117	Amino acid Mixure, 4 mM + Glucose, 16.7 mM + IBMX, 0.1 mM	8.901	3.1875	7.27083	2.35938	5.06771	7.8646	4.72917	2.98438	1.60435	7.29688	3.27604	0.697917	1.45	1.34167	4.06667	2.33854	1.64062	4.02604	8.84896	10.4167	1.01736	10.0052	6.44271	7.20833	9.35417	4.85938	6.15104	3.52604	7.04167	13.1667	9.55729	9.27778	1.97396	0.760417	6.32292	2.53889	4.40625	13.8889		6.5	9.80729	5.57938	3.50132			117	Amino acid Mixure, 4 mM + Glucose, 16.7 mM + IBMX, 0.1 mM	4.1572
118	Amino acid Mixure, 4 mM + Glucose, 16.7 mM + IBMX, 0.1 mM	8.4948	3.3177	8.34375	2.01562	4.45833	10.417	4.32292	3.44792	1.8	8.41146	3.82812	0.760417	1.70417	1.38333	3.87083	2.4099	1.26562	4.375	9.76042	10.4167	1.09722	10.3958	6.16667	7.66667	9.18229	4.41146	6.25	3.4375	7.15625	12.5833	10.4792	9.13889	1.65625	0.723958	6.44792	2.61111	4.45312	11.7188		8.83854	9.98438	5.73008	3.55203			118	Amino acid Mixure, 4 mM + Glucose, 16.7 mM + IBMX, 0.1 mM	4.3939
119	Amino acid Mixure, 4 mM + Glucose, 16.7 mM + IBMX, 0.1 mM	7.5469	3.125	8.86979	2.14583	5.05729	10.417	4.69792	3.4375	1.72826	8.09375	4.00521	0.755208	1.85417	1.68333	3.75	3.07604	1.42188	5.01042	10.3333	12.35	1.17014	9.89583	6.69271	7.67708	8.19271	5.05208	6.95312	3.56771	7.07812	12.6042	10.2292	9.3	1.90625	0.864583	6.15104	2.61667	4.36979	12.9167	1.29167	9	10.2865	5.78475	3.63188			119	Amino acid Mixure, 4 mM + Glucose, 16.7 mM + IBMX, 0.1 mM	4.3608
120	Amino acid Mixure, 4 mM + Glucose, 16.7 mM + IBMX, 0.1 mM	10.417	3.1562	10.375	2.23958	4.39062	10.417	4.73958	4	1.92391	9.17708	3.25	0.703125	1.3625	1.44583	3.97917	2.61406	1.60938	4.98958	8.60938	10.4167	1.18056	10.0521	5.70312	7.83333	8.89062	6.01042	7.03125	3.63542	6.50521	12.4236	8.36111	10.5222	2.03646	0.765625	7.30729	2.7	4.52083	14.0278	1.33854	6.98958	9	5.77197	3.6499			120	Amino acid Mixure, 4 mM + Glucose, 16.7 mM + IBMX, 0.1 mM	4.607
121	No Stimuli	8.0521	3.2812	9.11458	2.43229	4.23958	9.5885	5.21354	4.39062	1.80652	7.46354	3.58333	0.543403	1.97083	1.61667	3.92917	2.65365	1.57812	4.95312	8.78125	12.25	1.10069	9.14062	5.71354	7.64062	9.00521	5.47396	6.40104	3.66146	7.25	13.4375	8.79167	8.81667	1.875	0.864583	6.93229	2.40556	4.39583	11.1806	1.45833	8.05729	10.4167	5.64539	3.45298			121	No Stimuli	4.697
122	No Stimuli	10.417	3.7708	9.80208	2.44792	4.31771	8.4844	10.4167	3.83854	1.48043	6.20833	3.35417	0.690972	1.2625	1.4	3.57083	2.19062	1.43229	3.75521	7.98958	10.2604	0.996528	10.4167	5.83854	5.97917	9.04688	4.53646	6.13542	3.69792	6.97396	11.6528	9.63194	7.27222	1.76562	0.8125	6.61979	3.03889	4.57292	12.1111	1.21875	7.13021	9	5.50095	3.45595			122	No Stimuli	4.8011
123	No Stimuli	10.24		5.73438	2.43229	4.82292	8.4844	4.91667	4.34375	1.52609	5.97917	3.23958	0.550347	1.4	1.0875	3.09167	2.01302	1.47396	4.66146	6.125	10.4167	0.78125	10.1615	5.30208	8.13542	8.19792	4.86458	6	3.55208	4.48958	12.5903	7.64583	7.74444	1.50521	0.598958	5.78125	2.52222	3.39583	13.4583	1.17188	8.83333	10.2812	5.2388	3.48854			123	No Stimuli	5.6392
124	No Stimuli	4.8611	1.8958	4.86111	2.74896	3.47569	6.2	4.86111	3.15	1.01652	4.86111	2.49375	0.504861	1.3875	0.895833	1.16042	1.57691	0.952778	4.56701	4.28021	4.86111	0.488889	4.86111	3.98854	4.86111	4.86111	2.61042	4.86111	2.62743	3.74549	7.45833	5.86111	7.29444	1.0184	0.7	4.47465	2.33333	1.72569	8.33333	0.828819	4.69792	4.86111	3.49035	2.07258			124	No Stimuli	3.3033
125	No Stimuli	4.8611	1.9274	4.86111	1.97847	3.65313	5.8611	4.18785	2.13889	0.724348	4.28264	1.96632	0.231944	1.37083	0.8625	1.38889	0.978472	0.719444	2.71979	2.31875	12.325	0.309722	3.65556	3.57778	4.10521	4.38229	1.49479	4.47222	1.56285	2.89236	6.27083	4.85764	5.73889	0.802083	0.571181	3.51458	2.19444	1.13507	5.69444	0.486111	3.30903	6.30556	3.09001	2.3491			125	No Stimuli	2.583
126	No Stimuli	4.849	1.5458	4.86111	1.85938	3.93264	4.8611	4.50868	1.76458	0.566087	3.28125	1.84722	0.144444	1.0125	0.608333	1.38889	0.60868	0.517708	2.48889	1.8059	4.66181	0.341667	2.68819	2.74896	2.84618	2.86806	1.35139	3.31771	0.821528	2.03924	6.75833	3.92292	4.04444	0.704861	0.403472	2.50833	1.575	0.546875	4.29965	0.328125	2.76354	4.74931	2.40834	1.67503			126	No Stimuli	2.5764
127	No Stimuli	2.9313	1.3003	4.35799	1.04514	3.30556	4.8611	3.66042	1.46076	0.435217	2.00764	1.33681	0.101736	0.5625	0.483333	1.12083	0.444792	0.447222	1.56528	1.13993	3.40764	0.276389	1.7184	2.53264	1.75243	1.925	0.836111	2.52778	0.359722	1.83993	5.09167	2.92882	2.72778	0.490972	0.247917	1.71111	1.13056	0.719444	2.5934	0.4	1.575	3.98854	1.789	1.34059			127	No Stimuli	1.9157
128	No Stimuli	2.2872	1.1618	3.86701	0.736458	1.86424	4.8611	2.09514	1.01111	0.295217	1.24444	1.15694	0.058333	0.333333	0.258333	0.440278	0.331076	0.347569	0.930903	0.875	2.89236	0.205556	1.28819	2.0684	1.12292	1.23958	0.537153	2.57396	0.226042	1.58472	3.775	2.55451	1.33611	0.425347	0.209028	1.33924	0.888889	0.580903	2.43056	0.3	1.27361	2.56424	1.35541	1.12922			128	No Stimuli	1.5909
129	No Stimuli	1.9858	1.1035	1.88854	0.527431	1.50208	4.2924	2.0684	0.729167	0.276957	0.799653	0.862847	0.04375	0.166667	0.2	0.38125	0.332639	0.277083	0.697569	0.520139	2.48403	0.151389	1.04028	1.85208	0.943056	1.05	0.403472	1.9809	0.143403	1.31007	3.38333	2.04167	0.996528	0.342708	0.123958	0.986806	0.533333	0.447222	1.78646	0.272222	0.758333	2.15347	1.06928	0.941246			129	No Stimuli	1.233
130	No Stimuli	1.733	1.033	1.37569	0.495833	1.08403	3.2764	1.89826	0.687847	0.27087	0.607639	0.792361	0.040625	0.098611	0.11875	0.389583	0.287674	0.226042	0.576042	0.342708	1.57986	0.145833	0.860417	1.42917	0.573611	0.775347	0.294097	1.67222	0.099653	1.15694	2.18507	1.61146	0.74375	0.357292	0.157986	0.695139	0.391667	0.264931	1.37326	0.179861	0.690278	1.62847	0.834178	0.703351			130	No Stimuli	1.0098
131	No Stimuli	1.5823	0.9066	1.00382	0.230903	0.879861	2.5812	1.20556	0.590625	0.243478	0.644097	0.559028	0.031944	0.093056	0.095139	0.284028	0.238368	0.260069	0.418056	0.291667	1.56771	0.118056	0.731597	1.43403	0.500694	0.605208	0.247917	1.22986	0.102083	0.994097	2.16806	1.29306	0.538194	0.323264	0.080208	0.641667	0.308333	0.21875	1.32708	0.187153	0.573611	1.30278	0.698371	0.597963			131	No Stimuli	0.69381
132	No Stimuli	1.4365	0.86042	0.746181	0.182292	0.661111	1.9833	0.991667	0.583333	0.228261	0.447222	0.488542	0.029861	0.070139	0.071528	0.245139	0.229166	0.245486	0.318403	0.213889	1.21285	0.113889	0.7	1.16181	0.432639	0.544444	0.213889	1.03785	0.085069	0.806944	1.68924	0.947917	0.382639	0.352431	0.094792	0.464236	0.316667	0.187153	1.08646	0.182292	0.712153	1.09375	0.581745	0.472295			132	No Stimuli	0.53914
133	No Stimuli	1.3198	0.76562	0.544444	0.167708	0.456944	1.5677	1.1375	0.517708	0.191739	0.415625	0.427778	0.026736	0.056944	0.06875	0.313889	0.238889	0.243056	0.362153	0.213889	1.18125	0.1	0.614931	1.00382	0.413194	0.461806	0.228472	0.928472	0.097222	0.911458	1.27847	0.746181	0.314583	0.420486	0.0875	0.401042	0.238889	0.206597	0.879861	0.172569	0.785069	0.853125	0.521021	0.398646			133	No Stimuli	0.44634
134	No Stimuli	1.3417	0.77049	0.471528	0.128819	0.296528	1.033	0.551736	0.418056	0.161304	0.330556	0.311111	0.01875	0.046528	0.050694	0.24375	0.22066	0.247917	0.21875	0.211458	1.06458	0.086111	0.641667	0.928472	0.320833	0.364583	0.184722	0.760764	0.097222	0.636806	1.03299	0.687847	0.265972	0.332986	0.072917	0.476389	0.205556	0.250347	0.765625	0.182292	0.483681	0.848264	0.433267	0.330903			134	No Stimuli	0.3447
135	No Stimuli	1.0184	0.69028	0.476389	0.121528	0.269792	1.0792	0.729167	0.328125	0.155217	0.284375	0.255208	0.017361	0.059028	0.060417	0.222222	0.217534	0.243056	0.264931	0.175	0.892014	0.0625	0.580903	0.768056	0.291667	0.325694	0.272222	0.597917	0.0875	0.610069	0.838542	0.478819	0.215278	0.332986	0.077778	0.444792	0.175	0.39375	0.605208	0.148264	0.386458	0.719444	0.389563	0.278751			135	No Stimuli	0.2541
136	No Stimuli	1.1351	0.67569	0.367014	0.162847	0.264931	1.0767	0.590625	0.367014	0.14913	0.277083	0.245486	0.018403	0.05625	0.055556	0.136111	0.212326	0.221181	0.269792	0.187153	0.862847	0.075	0.590625	0.719444	0.260069	0.318403	0.179861	0.488542	0.070486	0.507986	0.646528	0.430208	0.165972	0.286806	0.072917	0.405903	0.158333	0.194444	0.634375	0.153125	0.340278	0.6125	0.357147	0.271938			136	No Stimuli	0.22096
137	No Stimuli	1.0451	0.58333	0.296528	0.133681	0.2625	0.87257	0.471528	0.342708	0.155217	0.250347	0.162847	0.016667	0.080556	0.047917	0.130556	0.209896	0.196875	0.187153	0.155556	0.738889	0.052778	0.537153	0.646528	0.301389	0.289236	0.121528	0.381597	0.072917	0.447222	0.556597	0.418056	0.158333	0.311111	0.063194	0.296528	0.152778	0.201736	0.546875	0.170139	0.379167	0.61	0.318422	0.236352			137	No Stimuli	0.18561
138	No Stimuli	1.1181	0.55417	0.252778	0.080208	0.228472	0.76319	0.449653	0.386458	0.14	0.264931	0.153125	0.020139	0.067361	0.053472	0.217361	0.204341	0.194444	0.233333	0.150694	0.622222	0.061111	0.532292	0.678125	0.315972	0.325694	0.175	0.337847	0.097222	0.435069	0.525	0.391319	0.135417	0.347569	0.063194	0.371875	0.147222	0.221181	0.593056	0.192014	0.352431	0.554167	0.317249	0.228933			138	No Stimuli	0.19444
139	No Stimuli	1.0767	0.65382	0.213889	0.116667	0.148264	0.7559	0.396181	0.364583	0.164348	0.172569	0.133681	0.015972	0.088194	0.059722	0.154861	0.203472	0.184722	0.157986	0.157986	0.619792	0.045833	0.503125	0.634375	0.267361	0.235764	0.143403	0.235764	0.070486	0.420486	0.449653	0.381597	0.136806	0.330556	0.053472	0.279514	0.122222	0.213889	0.537153	0.578472	0.335417	0.498264	0.300315	0.228883			139	No Stimuli	0.18561
140	No Stimuli	0.95035	0.57118	0.21875	0.077778	0.209028	0.66111	0.379167	0.291667	0.127826	0.175	0.092361	0.017708	0.041667	0.04375	0.166667	0.194965	0.189583	0.126389	0.148264	0.512847	0.043056	0.512847	0.639236	0.345139	0.30625	0.204167	0.245486	0.077778	0.379167	0.398611	0.367014	0.129861	0.274653	0.065625	0.245486	0.141667	0.325694	0.471528	0.5	0.415625	0.517708	0.28787	0.205263			140	No Stimuli	0.14583
141	KCl, 30 mM	0.89201	0.58576	0.260069	0.0875	0.172569	0.66354	0.264931	0.286806	0.121739	0.155556	0.184722	0.01875	0.070139	0.053472	0.189583	0.182812	0.247917	0.162847	1.05972	2.22396	0.0375	0.785069	0.617361	0.503125	0.301389	0.199306	0.459375	1.8375	1.76458	0.391319	0.347569	0.124306	0.301389	0.109375	1.72812	0.163889	0.658681	0.741319	0.48	0.332986	0.529861	0.495084	0.528901			141	KCl, 30 mM	0.17014
142	KCl, 30 mM	0.74375	0.74861	0.276042	0.15625	0.125	0.78125	0.401042	0.354167	1.74783	0.203125	3.51562	0.6625	1.025	1.01667	4.33333	3.58281	2.73958	4.34375	4.86111	8.43229	0.878472	3.59896	5.23438	6.38021	3.75	2.125	5.98958	6.58333	5.22396	3.97396	2.04167	2.37917	0.567708	0.463542	7.61979	1.18889	1.94792	10.151	0.453125	0.963542	7.38542	2.9012	2.65891			142	KCl, 30 mM	0.18466
143	KCl, 30 mM	1.9785	0.96736	0.229167	0.104167	0.213542	0.72396	0.416667	3.52083	1.35	0.260417	3.26042	0.555208	3.60417	1.42083	4.89583	3.09687	2.16146	4.47917	3.34687	5.23438	1.20833	3.85417	4.98958	5.51562	3.92188	1.43229	5.17188	3.70312	4.125	5.24479	8.82292	5.69583	0.557292	0.421875	4.98958	1.27778	1.96875	7.78646	0.453125	4.90104	8.76562	3.08846	2.39074			143	KCl, 30 mM	0.2178
144	KCl, 30 mM	4.1667	2.0729	0.223958	0.104167	0.125	0.90625	0.322917	7.36979	0.9	5.25521	1.5625	0.167708	1.46667	1.02917	3.00833	1.63646	1.48958	2.72396	1.6941	4.82812	0.951389	2.5625	2.61979	3.46875	2.60938	0.776042	2.97917	2.32292	3.90104	4.59375	4.39062	2.98333	0.484375	0.375	4.18229	0.944444	0.864583	4.42188	0.291667	3.97917	5.91146	2.35773	1.82473			144	KCl, 30 mM	0.23674
145	KCl, 30 mM	3.375	1.8802	0.739583	0.8125	0.442708	3.6354	1.29688	4.52604	0.697826	5.27083	1.27083	0.098958	0.8375	0.7125	2.12917	1.39479	1.16146	2.29167	1.09132	4.25	0.913194	2.25	1.94792	3.11979	1.96354	0.53125	2.0625	1.45833	3.46875	3.19271	3.68229	1.62083	0.427083	0.229167	3.21875	0.744444	0.598958	2.97917	0.276042	3.69792	4.02083	1.95899	1.38257			145	KCl, 30 mM	1.8277
146	KCl, 30 mM	3.099	1.3906	2.75521	0.927083	0.729167	3.9375	1.48438	3.22917	0.482609	2.98438	1.13021	0.075	0.583333	0.520833	1.32083	1.29271	1.15625	1.39583	1.32708	4.16146	0.923611	2.21354	1.64062	3.01562	1.57812	0.4375	1.88021	1.1875	3.26562	2.90104	3.34375	1.35833	0.359375	0.177083	3.14583	0.522222	0.5625	2.93229	0.265625	3.95833	3.40625	1.78189	1.21599			146	KCl, 30 mM	2.5189
147	KCl, 30 mM	2.8177	1.3594	2.35417	0.640625	0.651042	3.0677	0.963542	2.8125	0.469565	1.90104	1.05729	0.086806	0.591667	0.458333	1.14167	1.42865	1.07292	1.33333	1.24444	3.69792	0.927083	1.97917	1.625	2.90625	1.70833	0.4375	1.76562	0.885417	2.80208	2.76042	2.39062	1.0625	0.421875	0.197917	2.41667	0.566667	0.53125	2.41667	0.28125	3.59375	3.09896	1.55915	1.0253			147	KCl, 30 mM	1.9223
148	KCl, 30 mM	2.7135	1.0781	1.39583	0.447917	0.442708	2.8125	0.8125	2.39583	0.469565	1.46875	0.890625	0.082292	0.620833	0.416667	1.125	0.985417	0.796875	1.14583	1.1375	3.11979	0.638889	2.02604	1.50521	2.45312	1.63542	0.359375	1.5625	0.760417	1.92708	2.39583	2.72917	1.00278	0.34375	0.1875	2.16667	0.488889	0.401042	2.75	0.239583	4.06771	3.22396	1.39568	1.00746			148	KCl, 30 mM	1.6288
149	KCl, 30 mM	2.4062	0.97396	1.01042	0.427083	0.458333	2.1875	0.71875	2.24479	0.430435	1.36979	0.71875	0.086111	0.633333	0.416667	1.125	0.871875	0.817708	1.15104	1.01354	3.17188	0.479167	1.82292	1.42188	2.29167	1.22917	0.364583	1.65625	0.729167	2.09375	2.57812	2.13542	0.836806	0.359375	0.223958	2.15104	0.633333	0.421875	2.46875	0.244792	3.66146	2.94792	1.29231	0.921414			149	KCl, 30 mM	1.4583
150	KCl, 30 mM	2.5729	0.98437	0.661458	0.364583	0.427083	2.0417	0.760417	2.13021	0.48913	1.33854	0.833333	0.1	0.644444	2.14583	1.13056	0.950868	0.817708	1.02083	0.819097	3.26042	0.444444	1.78646	1.39583	2.55729	1.21875	0.364583	1.84375	0.6875	1.71875	2.28125	1.63542	0.727778	0.359375	0.177083	1.95833	0.583333	0.427083	2.44271	0.223958	3.91146	2.88021	1.29558	0.930272			150	KCl, 30 mM	1.3447
151	KCl, 30 mM	2.4062	0.94271	0.697917	0.375	0.302083	2.0156	0.640625	1.85938	0.417391	1.19271	0.744792	0.093403	0.641667	2.28333	1.25	0.776042	0.6875	0.973958	0.875	3.41146	0.454861	1.54688	1.27604	2.33854	1.15625	0.375	1.625	0.755208	1.61979	2.21354	2.24479	0.699306	0.442708	0.21875	2.04688	0.638889	0.703125	2.31771	0.286458	3.30208	2.5	1.2524	0.868539			151	KCl, 30 mM	1.4725
152	KCl, 30 mM	2.4427	1.0156	0.526042	0.401042	0.338542	1.5833	0.5625	1.43229	0.365217	0.895833	0.848958	0.080208	0.428472	1.40417	0.91875	0.9125	0.666667	0.729167	0.748611	2.97917	0.402778	1.39583	1.33854	2.50521	1.0625	0.302083	1.39062	0.604167	1.24479	2.16146	2.21354	0.627778	0.432292	0.171875	1.69792	0.355556	0.510417	2.20833	0.255208	3.26562	2.77604	1.12689	0.840818			152	KCl, 30 mM	1.785
153	KCl, 30 mM	2.0104	1.1198	0.46875	0.463542	0.401042	1.4635	0.557292	1.14583	0.293478	1.04688	0.666667	0.087847	0.484028	1.54583	0.783333	0.545486	0.677083	0.864583	0.704861	2.77604	0.333333	1.53125	1.10417	2.16146	0.953125	0.34375	1.35938	0.598958	1.21875	2.22917	1.80208	0.599306	0.447917	0.182292	1.5	0.316667	0.661458	1.70833	0.260417	2.09375	2.43229	1.02303	0.694155			153	KCl, 30 mM	1.6241
154	KCl, 30 mM	2.0625	1.0781	0.494792	0.416667	0.338542	1.8177	0.557292	1.29167	0.332609	0.916667	0.588542	0.086806	0.434722	1.625	0.715972	0.539237	0.520833	1	0.658681	2.26042	0.305556	1.39583	1.09375	2.00521	0.947917	0.338542	1.375	0.572917	1.20833	2.00521	1.56771	0.509028	0.395833	0.182292	1.34375	0.338889	0.40625	4.02604	0.302083	1.89583	2.42708	1.03365	0.805108			154	KCl, 30 mM	1.4915
155	KCl, 30 mM	2.0573	0.97917	0.427083	0.328125	0.322917	1.4479	0.578125	1.0625	0.378261	0.833333	0.552083	0.080208	0.423611	1.4625	1.02708	0.493924	0.557292	0.708333	0.668403	2.32812	0.253472	1.25521	1.01562	1.91146	0.838542	0.255208	1.09896		1.13021	1.74479	1.59896	0.531944	0.348958	0.177083	1.34896	0.333333	0.864583	2.17188	0.296875	1.45312	2.47396	0.945485	0.643779			155	KCl, 30 mM	1.5672
156	KCl, 30 mM	1.9427	1.0729	0.385417	0.369792	0.302083	1.4844	0.40625	1.08333	0.352174	0.90625	0.536458	0.077431	0.486111	1.60417	1.32083	0.442188	0.614583	0.6875	0.520139	2.48958	0.177083	1.375	1.11979	1.84375	0.807292	0.307292	0.880208	0.520833	1.11979	1.68229	1.77083	0.461111	0.395833	0.145833	1.22396	0.266667	0.296875	1.55729	0.244792	2.33333	1.85417	0.913861	0.650261			156	KCl, 30 mM	1.6903
157	KCl, 30 mM	1.75	1.0104	0.369792	0.317708	0.21875	1.3385	0.645833	1.03125	0.319565	0.755208	0.432292	0.089931	0.428472	1.48333	0.546528	0.683681	0.5625	0.578125	0.525	2.23958	0.204861	1.22396	1	1.76562	0.895833	0.286458	0.9375	0.354167	1.09896	1.42188	1.49479	0.453472	0.427083	0.140625	1.13021	0.277778	0.713542	1.41667	0.223958	2.08333	2.32812	0.858665	0.601461			157	KCl, 30 mM	1.7282
158	KCl, 30 mM	2.0625	1.151	0.34375	0.302083	0.213542	1.0417	0.463542	0.828125	0.293478	0.708333	0.494792	0.061806	0.308333	1.22917	0.922917	0.392882	0.645833	0.5	0.478819	1.97396	0.173611	1.40104	1.02083	1.47917	0.796875	0.234375	0.890625	0.40625	0.963542	1.46875	1.56771	0.401389	0.453125	0.161458	1.14583	0.327778	0.411458	1.28125	0.286458	2	2.17708	0.816224	0.583225			158	KCl, 30 mM	1.7045
159	KCl, 30 mM	1.8646	1.0781	0.333333	0.416667	0.25	1.1979	0.505208	0.848958	0.306522	0.770833	0.817708	0.063194	0.279167	1.275	0.965278	0.384028	0.510417	0.614583	0.500694	0.234375	0.138889		1.48958	1.44792	0.791667	0.239583	0.786458	0.385417	1.06771	1.26042	1.53646	0.369444	0.40625	0.119792	1.14583	0.244444	0.421875	1.22396	0.302083	2.22396	1.97917	0.769937	0.553929			159	KCl, 30 mM	1.7472
160	KCl, 30 mM																																														160	KCl, 30 mM
Graph 3H
Insulin secretion/ insulin content		ND without Autoantibodies																																									n=26					ND with Autoantibodies
Time (min)	Stimulus	HPAP004	HPAP005	HPAP006	HPAP011	HPAP012	HPAP014	HPAP018	HPAP022	HPAP034	HPAP035	HPAP036	HPAP042	HPAP056	HPAP059	HPAP063	HPAP066	HPAP067	HPAP069	HPAP074	HPAP075	HPAP082	HPAP095	HPAP099	HPAP101	HPAP103	HPAP104	HPAP105	HPAP110	HPAP117	HPAP118	HPAP119	HPAP121	HPAP122	HPAP125	HPAP127	HPAP128	HPAP129	HPAP131	HPAP132	HPAP139	HPAP140	Average	STDEV			Time (min)	Stimulus	HPAP003
20	No Stimuli	0.183661	0.085856	0.11605	0.069996	0.299619	0.753241	0.495195	0.121767	0.100151	0.791274	0.302712	0.114906	2.49607	0.122456	0.19925	0.060717	0.149465	0.314945	0.749771	0.219815	0.190166	0.567984	1.01567	0.154061	0.398038	0.028525	0.158654	0.088916	0.721988	0.298203	0.504873	0.153905	0.107582	0.31362	0.2749	1.10725	0.065438	0.511295	0.042553	0.058394	0.276679	0.360625	0.437621			20	No Stimuli	0.189964
21	No Stimuli	0.21176	0.091859	0.123477	0.108615	0.330422	0.75627	0.435127	0.145165	0.111279	0.761415	0.290899	0.094921	2.73191	0.122985	0.220598	0.064113	0.146672	0.318369	0.560898	0.218847	0.18677	0.572791	0.946423	0.144406	0.416472	0.038033	0.151175	0.079912	0.686094	0.283905	0.490375	0.13633	0.122524	0.404087	0.281399	1.0571	0.059206	0.501924	0.034619	0.059297	0.263002	0.360035	0.457109			21	No Stimuli	0.203964
22	No Stimuli	0.173382	0.078049	0.095625	0.07965	0.243615	0.723665	0.414615	0.169041	0.133535	0.694231	0.295329	0.099921	2.91536	0.107612	0.279201	0.066095	0.128512	0.328638	0.557082	0.160262	0.312416	0.515912	1.01839	0.143147	0.366631	0.026742	0.146367	0.072033	0.836849	0.268587	0.436647	0.121082	0.082679	0.235216	0.222909	0.964506	0.050896	0.401188	0.030292	0.0605	0.280953	0.349692	0.482761			22	No Stimuli	0.169968
23	No Stimuli	0.194628	0.075049	0.099339	0.137579	0.291219	0.750236	0.414615	0.152805	0.119625	0.595695	0.2466	0.102417	2.10954	0.117685	0.20511	0.067982	0.139687	0.332062	0.540865	0.169945	0.18677	0.526327	1.03604	0.123837	0.375507	0.026148	0.132479	0.072596	0.796853	0.227737	0.448587	0.098468	0.129497	0.31362	0.227458	1.03781	0.041029	0.355505	0.027407	0.065015	0.257018	0.326058	0.382904			23	No Stimuli	0.155973
24	No Stimuli	0.226151	0.085254	0.105838	0.069996	0.31082	0.819046	0.356013	0.153283	0.150227	0.680794	0.205253	0.114906	2.37159	0.100721	0.216831	0.058028	0.14737	0.305531	0.44929	0.192217	0.264873	0.52873	1.02925	0.142307	0.367997	0.025554	0.123932	0.063592	0.806083	0.235907	0.445175	0.12302	0.125512	0.310174	0.254103	1.08025	0.049338	0.4334	0.040389	0.051922	0.251319	0.338341	0.417844			24	No Stimuli	0.166968
25	No Stimuli	0.187773	0.082853	0.090055	0.091719	0.263217	0.735138	0.364803	0.146597	0.130752	0.634512	0.162431	0.119906	2.80398	0.114504	0.205529	0.068407	0.140386	0.290126	0.44929	0.173334	0.305623	0.519117	0.97358	0.125096	0.360487	0.030308	0.128739	0.054588	0.727116	0.215482	0.461379	0.088259	0.108578	0.297767	0.211861	1.06482	0.050377	0.371319	0.113955	0.051772	0.21969	0.335005	0.466269			25	No Stimuli	0.151973
26	No Stimuli	0.176125	0.082853	0.107694	0.086892	0.240816	0.639781	0.307665	0.134182	0.097369	0.544934	0.150618	0.074942	2.16195	0.089589	0.157391	0.069114	0.148068	0.200264	0.480769	0.171398	0.342978	0.581603	1.02246	0.124256	0.34137	0.024365	0.11485	0.050648	0.600973	0.212418	0.466496	0.089422	0.103598	0.272953	0.226159	0.910494	0.055051	0.361362	0.041831	0.04816	0.229948	0.301069	0.378387			26	No Stimuli	0.173968
27	No Stimuli	0.182293	0.081651	0.105838	0.057928	0.274417	0.561311	0.298875	0.120334	0.094587	0.470286	0.158001	0.084935	2.19471	0.083227	0.164507	0.059537	0.148068	0.241344	0.396825	0.154936	0.108665	0.503095	0.996664	0.122577	0.332495	0.025554	0.110577	0.047272	0.650199	0.1971	0.405945	0.069522	0.091644	0.235216	0.204063	0.875772	0.055051	0.380104	0.033898	0.043795	0.14874	0.282233	0.378688			27	No Stimuli	0.154973
28	No Stimuli	0.20902	0.081052	0.090055	0.048273	0.193212	0.639781	0.298875	0.131794	0.108497	0.500145	0.225926	0.05246	2.07023	0.09489	0.180832	0.078833	0.114543	0.226795	0.401595	0.131211	0.230914	0.523923	0.94235	0.115441	0.314743	0.021988	0.105235	0.043332	0.709681	0.193015	0.400828	0.059184	0.100609	0.229184	0.202113	0.891204	0.065957	0.335592	0.033898	0.045752	0.211427	0.284253	0.364114			28	No Stimuli	0.138973
29	No Stimuli	0.183661	0.082254	0.08727	0.048273	0.221214	0.562528	0.295945	0.131317	0.102933	0.495666	0.128468	0.092424	1.99161	0.083757	0.161158	0.05765	0.124322	0.254181	0.406365	0.130243	0.125645	0.534338	0.915192	0.108724	0.318157	0.017234	0.100962	0.041082	0.649174	0.166463	0.416179	0.064095	0.068733	0.241246	0.27295	0.875772	0.066477	0.353748	0.025243	0.057942	0.213137	0.274969	0.35146			29	No Stimuli	0.126977
30	Amino acid Mixure, 4 mM	0.193257	0.070245	0.062203	0.048273	0.221214	0.604768	0.332571	0.14803	0.133535	0.56285	0.126991	0.124899	2.31918	0.092769	0.19925	0.071756	0.131306	0.26274	0.304296	0.13799	0.281853	0.463039	0.940992	0.110823	0.282654	0.025554	0.096688	0.091167	0.584564	0.169526	0.388036	0.058667	0.062756	0.247278	0.212511	0.84105	0.042587	0.32915	0.033898	0.049665	0.194615	0.284273	0.389303			30	Amino acid Mixure, 4 mM	0.128977
31	Amino acid Mixure, 4 mM	0.187773	0.06064	0.094697	0.048273	0.198812	0.558902	0.276899	0.132749	0.116843	0.570314	0.143235	0.109914	1.82783	0.082697	0.171204	0.048498	0.122925	0.23193	0.316697	0.130243	0.434665	0.465443	0.890751	0.107885	0.288116	0.023771	0.107372	0.037142	0.564053	0.171568	0.417032	0.048846	0.057775	0.235216	0.213811	1.04167	0.047261	0.310408	0.043274	0.044548	0.187492	0.272419	0.337229			31	Amino acid Mixure, 4 mM	0.103982
32	Amino acid Mixure, 4 mM	0.20422	0.070245	0.099339	0.048273	0.173611	0.429749	0.221226	0.155193	0.125189	0.609132	0.323385	0.092424	2.98742	0.121925	0.173715	0.10077	0.126417	0.36116	0.923382	0.390729	0.207144	0.539945	1.09715	0.21409	0.413741	0.035656	0.167735	0.145192	0.749678	0.383987	0.820419	0.080764	0.118539	0.422181	0.38083	1.03781	0.166711	0.474398	0.032455	0.063059	0.302039	0.380269	0.50019			32	Amino acid Mixure, 4 mM	0.219959
33	Amino acid Mixure, 4 mM	0.283033	0.178914	0.078914	0.118269	0.176411	0.405587	0.323781	0.279824	0.178047	1.21528	0.493199	0.089928	5.57521	0.302163	0.557565	0.165025	0.144576	0.777093	1.88015	0.885555	0.573892	0.618454	1.08628	0.346323	0.585108	0.05289	0.413462	0.315145	1.03478	1.01307	1.10271	0.258446	0.234091	0.57296	0.615437	1.86728	0.249288	0.653029	0.041831	0.117841	0.569884	0.644652	0.90517			33	Amino acid Mixure, 4 mM	0.533891
34	Amino acid Mixure, 4 mM	0.296053	0.07985	0.082628	0.106201	0.204414	0.531736	0.259318	0.499482	0.1697	1.01223	0.361778	0.114906	4.90697	0.298982	0.533286	0.109592	0.101273	0.383412	1.38793	0.475459	0.387122	0.428592	0.77126	0.213671	0.385065	0.041599	0.242521	0.169953	0.961967	0.770016	0.680555	0.058796	0.184284	0.482491	0.500409	1.53935	0.130876	0.361948	0.049765	0.118593	0.431117	0.507931	0.783916			34	Amino acid Mixure, 4 mM	0.27995
35	Amino acid Mixure, 4 mM	0.27001	0.07685	0.147616	0.135165	0.215614	0.659697	0.442452	0.474173	0.14188	0.56285	0.162431	0.097424	3.22982	0.233249	0.369198	0.085815		0.254181	0.848024	0.236277	0.319208	0.37652	0.609675	0.131393	0.264903	0.032685	0.113782	0.09173	0.967095	0.421773	0.358187	0.173805	0.152408	0.301558	0.406176	1.23071	0.080499	0.271168	0.04688	0.09963	0.310587	0.385077	0.528939			35	Amino acid Mixure, 4 mM	0.139973
36	Amino acid Mixure, 4 mM	0.232319	0.075049	0.41221	0.251021	0.450828	0.533549	0.577239	0.422124	0.130752	0.312031	0.116655	0.117403	1.86058	0.182888	0.227295	0.066378	0.097082	0.205399	0.540865	0.16704	0.35656	0.387735	0.62597	0.113342	0.233497	0.017234	0.07532	0.057964	0.920945	0.272671	0.327485	0.117851	0.107582	0.325682	0.375631	0.902778	0.051416	0.233099	0.043995	0.101135	0.19547	0.312734	0.328553			36	Amino acid Mixure, 4 mM	0.097982
37	Amino acid Mixure, 4 mM	0.237803	0.083452	0.344437	0.207575	0.47043	0.461733	0.533286	0.374372	0.122407	0.232904	0.094505	0.119906	1.28407	0.136769	0.13981	0.061094	0.087304	0.142924	0.401595	0.121528	0.203748	0.352486	0.566225	0.088575	0.200043	0.023771	0.071047	0.04896	0.786597	0.176675	0.261818	0.079601	0.064748	0.283464	0.195614	0.895061	0.063361	0.231342	0.043995	0.092256	0.159283	0.257233	0.257059			37	Amino acid Mixure, 4 mM	0.094982
38	Amino acid Mixure, 4 mM	0.210388	0.087657	0.326798	0.142406	0.434028	0.435163	0.372128	0.279824	0.089023	0.241861	0.112225	0.122403	1.01546	0.09807	0.094602	0.060622	0.097082	0.128374	0.331006	0.103129	0.163	0.362901	0.590666	0.085636	0.183657	0.020799	0.068376	0.042207	0.817364	0.187908	0.233674	0.064482	0.050802	0.295526	0.178067	0.783179	0.058167	0.202644	0.039668	0.112423	0.152444	0.231118	0.224231			38	Amino acid Mixure, 4 mM	0.069986
39	Amino acid Mixure, 4 mM	0.195997	0.076248	0.321227	0.168956	0.372424	0.402583	0.31206	0.23446	0.102933	0.285157	0.109272	0.107417	1.07442	0.089059	0.10423	0.062887	0.088003	0.135221	0.287126	0.09393	0.342978	0.384531	0.551288	0.073043	0.194581	0.017828	0.059295	0.037142	0.738397	0.138889	0.231116	0.065645	0.060764	0.144747	0.153372	0.709876	0.055051	0.219043	0.037504	0.066972	0.130503	0.220395	0.218717			39	Amino acid Mixure, 4 mM	0.067986
40	Amino acid Mixure, 4 mM	0.173382	0.071447	0.272022	0.137579	0.296819	0.398957	0.397035	0.274094	0.127971	0.376229	0.119608	0.087432	1.25786	0.09383	0.109253	0.063877	0.071939	0.148914	0.286172	0.078436	0.359956	0.385332	0.567582	0.072203	0.190485	0.019017	0.060897	0.036017	0.821466	0.132761	0.388889	0.062932	0.04881	0.20506	0.139075	0.702161	0.060244	0.151104	0.045438	0.046956	0.125659	0.230851	0.246143			40	Amino acid Mixure, 4 mM	0.058991
41	Amino acid Mixure, 4 mM	0.185717	0.086455	0.24417	0.120683	0.257616	0.382046	0.322316	0.257859	0.139099	0.315017	0.073832	0.142388	1.23166	0.087468	0.112602	0.062368	0.074034	0.173733	0.304296	0.097803	0.203748	0.397349	0.526847	0.065487	0.174781	0.023177	0.063034	0.032077	0.882999	0.13174	0.249025	0.058021	0.029884	0.211089	0.157271	0.825617	0.054012	0.2208	0.090875	0.045902	0.134208	0.225588	0.247353			41	Amino acid Mixure, 4 mM	0.072986
42	Amino acid Mixure, 4 mM	0.167214	0.081651	0.231172	0.103787	0.210014	0.398361	0.363338	0.258336	0.119625	0.371749	0.076786	0.11241	1.10718	0.090649	0.103811	0.070907	0.076828	0.189994	0.243246	0.098772	0.220729	0.346078	0.543141	0.074722	0.172051	0.023771	0.065705	0.027013	0.761984	0.120507	0.287402	0.063319	0.019923	0.217122	0.141674	0.652006	0.050896	0.200887	0.041831	0.049063	0.140191	0.212094	0.219853			42	Amino acid Mixure, 4 mM	0.063986
43	Amino acid Mixure, 4 mM	0.15899	0.079251	0.193108	0.12551	0.16801	0.396548	0.344292	0.242101	0.111279	0.367271	0.056112	0.114906	1.15304	0.09648	0.097113	0.059443	0.075431	0.189994	0.264232	0.103613	0.213936	0.334061	0.501047	0.070104	0.163175	0.020205	0.057692	0.02645	0.697375	0.117443	0.250731	0.05156	0.020919	0.211089	0.150772	0.671296	0.052454	0.218457	0.042553	0.037625	0.152729	0.206302	0.220534			43	Amino acid Mixure, 4 mM	0.068986
44	Amino acid Mixure, 4 mM	0.161734	0.082254	0.181038	0.111029	0.201613	0.388701	0.269573	0.186709	0.094587	0.277692	0.066449	0.082432	1.20545	0.092769	0.053161	0.052932	0.076828	0.188282	0.289988	0.107971	0.163	0.324448	0.520058	0.071783	0.155665	0.023177	0.063568	0.030952	0.660455	0.130719	0.265229	0.057375	0.04383	0.248139	0.147523	0.713735	0.050377	0.2249	0.051207	0.036421	0.140191	0.202291	0.225652			44	Amino acid Mixure, 4 mM	0.066986
45	Amino acid Mixure, 4 mM	0.157622	0.072646	0.18011	0.118269	0.179212	0.319891	0.259318	0.172861	0.119625	0.315017	0.054636	0.104914	1.21856	0.099661	0.10423	0.078691	0.085209	0.183148	0.254693	0.098772	0.410895	0.31884	0.450807	0.068005	0.15703	0.020799	0.057692	0.032077	0.65225	0.113358	0.237086	0.074949	0.04383	0.25934	0.121528	0.736883	0.044145	0.188588	0.075008	0.06351	0.141616	0.205983	0.225024			45	Amino acid Mixure, 4 mM	0.060991
46	Amino acid Mixure, 4 mM	0.16653	0.087657	0.159685	0.142406	0.15401	0.313856	0.824836	0.173338	0.150227	0.279186	0.070879	0.099921	1.25786	0.090119	0.089998	0.052461	0.065653	0.235353	0.297619	0.088604	0.329394	0.330857	0.362546	0.060029	0.15703	0.016045	0.057158	0.02645	0.655327	0.085784	0.220029	0.056729	0.045822	0.26537	0.116329	0.640432	0.050896	0.171603	0.059862	0.06652	0.110558	0.211828	0.243194			46	Amino acid Mixure, 4 mM	0.055991
47	Amino acid Mixure, 4 mM	0.135691	0.094259	0.135547	0.074823	0.184812	0.292128	0.263713	0.172861	0.114061	0.28665	0.079739	0.119906	1.38889	0.09436	0.079114	0.062274	0.062859	0.217136	0.250878	0.080373	0.268269	0.327652	0.42365	0.060449	0.153617	0.015451	0.04968	0.024199	0.59687	0.099061	0.266082	0.061898	0.019923	0.199027	0.115679	0.632717	0.037913	0.176288	0.067075	0.046805	0.110558	0.19373	0.237227			47	Amino acid Mixure, 4 mM	0.051991
48	Amino acid Mixure, 4 mM	0.136375	0.080452	0.11605	0.086892	0.142809	0.354284	0.29448	0.204854	0.216994	0.264256	0.053159	0.117403	1.6968	0.09542	0.074091	0.050338	0.08032	0.239632	0.195551	0.091993	0.203748	0.298812	0.460312	0.062128	0.151568	0.019611	0.053953	0.023636	0.728141	0.101103	0.192739	0.059572	0.037853	0.283464	0.130626	0.717593	0.053493	0.162818	0.042553	0.041989	0.104289	0.207857	0.287304			48	Amino acid Mixure, 4 mM	0.055991
49	Amino acid Mixure, 4 mM	0.14597	0.079251	0.107694	0.094133	0.137209	0.309014	0.259318	0.179068	0.150227	0.264256	0.0443	0.11241	1.33648	0.091179	0.069905	0.16644	0.06705	0.239632	0.211767	0.081341	0.193562	0.287597	0.401924	0.065067	0.148155	0.019017	0.051282	0.023636	0.625586	0.09089	0.199561	0.058021	0.028888	0.253308	0.102031	0.613426	0.05609	0.164575	0.038947	0.074948	0.0985899	0.188823	0.229149			49	Amino acid Mixure, 4 mM	0.047991
50	Amino acid Mixure, 4 mM	0.140487	0.082254	0.117907	0.096546	0.148409	0.255302	0.213901	0.130839	0.072331	0.210509	0.072355	0.109914	0.910642	0.077926	0.053998	0.053687	0.073336	0.187427	0.214629	0.082794	0.217333	0.302017	0.407356	0.060449	0.145424	0.023771	0.042735	0.023636	0.553797	0.101103	0.184211	0.051431	0.09762	0.25934	0.142974	0.613426	0.059206	0.178631	0.033898	0.079012	0.0823483	0.169876	0.175128			50	Amino acid Mixure, 4 mM	0.046991
51	Amino acid Mixure, 4 mM	0.134319	0.082853	0.118835	0.101373	0.114808	0.237805	0.222691	0.127019	0.114061	0.253805	0.053159	0.11241	1.06132	0.083757	0.081207	0.048356	0.062859	0.219092	0.190781	0.075531	0.438061	0.295608	0.369336	0.062968	0.148155	0.023177	0.045406	0.024761	0.501495	0.09089	0.189327	0.062027	0.049807	0.271402	0.137775	0.686728	0.046222	0.180388	0.037504	0.043946	0.0837729	0.177678	0.198477			51	Amino acid Mixure, 4 mM	0.047991
52	Amino acid Mixure, 4 mM	0.125411	0.07985	0.109552	0.086892	0.120408	0.255302	0.21097	0.122722	0.114061	0.244847	0.084169	0.129899	1.21856	0.092239	0.0833	0.050951	0.056573	0.183148	0.193643	0.072626	0.387122	0.291603	0.395135	0.05919	0.135865	0.021988	0.03953	0.021385	0.538414	0.09089	0.161184	0.062285	0.041837	0.20506	0.117629	0.794753	0.056609	0.156375	0.036783	0.055083	0.0840579	0.180193	0.223657			52	Amino acid Mixure, 4 mM	0.044992
53	Amino acid Mixure, 4 mM	0.119243	0.078049	0.109552	0.101373	0.117607	0.248671	0.227086	0.115559	0.105715	0.177663	0.059066	0.129899	1.56577	0.091709	0.099625	0.054678	0.074732	0.182292	0.182196	0.071658	0.179978	0.256354	0.369336	0.060869	0.1345	0.020205	0.036325	0.019696	0.499443	0.081699	0.168007	0.062285	0.019923	0.229184	0.11113	0.648149	0.065957	0.158133	0.036062	0.089246	0.0757946	0.176449	0.254769			53	Amino acid Mixure, 4 mM	0.040992
54	Amino acid Mixure, 4 mM	0.111704	0.07745	0.105838	0.077237	0.109207	0.26377	0.3062	0.134182	0.119625	0.223945	0.050206	0.132396	1.15959	0.080047	0.084556	0.059396	0.057272	0.220804	0.163118	0.070205	0.14602	0.242735	0.377483	0.062128	0.131086	0.023771	0.041133	0.024199	0.553797	0.098039	0.179094	0.056212	0.037853	0.223154	0.168319	0.729167	0.052454	0.165161	0.04688	0.077657	0.0814934	0.17377	0.210653			54	Amino acid Mixure, 4 mM	0.041992
55	Amino acid Mixure, 4 mM	0.11376	0.071447	0.11048	0.096546	0.109207	0.240822	0.310596	0.128929	0.130752	0.253805	0.038392	0.11241	1.06787	0.089589	0.071161	0.055386	0.064256	0.198552	0.173611	0.070205	0.152812	0.251547	0.342179	0.05835	0.127672	0.019017	0.035256	0.021385	0.495341	0.089869	0.150098	0.053498	0.027892	0.277434	0.137125	0.64429	0.043625	0.14759	0.041831	0.061705	0.0666764	0.164706	0.19305			55	Amino acid Mixure, 4 mM	0.042992
56	Amino acid Mixure, 4 mM	0.10828	0.082853	0.088198	0.106201	0.086805	0.211247	0.178739	0.113649	0.108497	0.177663	0.059066	0.082432	0.78616	0.083227	0.049813	0.069586	0.057471	0.151482	0.165026	0.066332	0.159604	0.248343	0.348968	0.053732	0.121528	0.014262	0.033654	0.019696	0.462524	0.079657	0.162037	0.063707	0.024903	0.20506	0.092283	0.547839	0.054012	0.139977	0.043995	0.072992	0.0766494	0.142882	0.150608			56	Amino acid Mixure, 4 mM	0.044992
57	Amino acid Mixure, 4 mM	0.108964	0.07985	0.113265	0.094133	0.126008	0.204609	0.137717	0.083565	0.111279	0.170198	0.053159	0.099921	0.779613	0.077926	0.072417	0.050621	0.059367	0.163463	0.154533	0.062943	0.108665	0.249144	0.358473	0.050374	0.131769	0.018422	0.03312	0.014632	0.538414	0.072508	0.148392	0.056858	0.040841	0.289496	0.097482	0.493828	0.036354	0.139977	0.033177	0.093309	0.0606926	0.143158	0.152879			57	Amino acid Mixure, 4 mM	0.037993
58	Amino acid Mixure, 4 mM	0.114447	0.078651	0.100267	0.082065	0.131608	0.222717	0.218296	0.106008	0.089023	0.180649	0.106318	0.104914	0.818925	0.090649	0.098369	0.04996	0.044001	0.17031	0.171703	0.054227	0.220729	0.247542	0.313664	0.051634	0.12699	0.019017	0.037927	0.019696	0.476881	0.074551	0.127924	0.049492	0.075706	0.235216	0.082535	0.451389	0.03168	0.135877	0.06419	0.054029	0.0655367	0.146227	0.148833			58	Amino acid Mixure, 4 mM	0.042992
59	Amino acid Mixure, 4 mM	0.101424	0.07745	0.106766	0.086892	0.137209	0.208229	0.188995	0.107441	0.119625	0.192593	0.050206	0.087432	0.917189	0.086408	0.093765	0.04996	0.050287	0.179724	0.173611	0.04987	0.088291	0.244337	0.294654	0.048695	0.132452	0.016045	0.032585	0.018008	0.473805	0.062296	0.122807	0.059959	0.046818	0.283464	0.075386	0.474538	0.035316	0.131777	0.04111	0.0301	0.0635421	0.142465	0.163029			59	Amino acid Mixure, 4 mM	0.060991
60	Amino acid Mixure, 4 mM	0.092516	0.079251	0.084485	0.069996	0.123207	0.21849	0.285689	0.108396	0.133535	0.192593	0.048729	0.132396	0.930292	0.081637	0.071579	0.045573	0.05378	0.165175	0.124962	0.04406	0.173186	0.229917	0.334032	0.054572	0.108556	0.019611	0.035791	0.01632	0.51175	0.066381	0.122807	0.060218	0.049807	0.223154	0.087734	0.466821	0.035316	0.144662	0.037504	0.033712	0.0601227	0.145325	0.167444			60	Amino acid Mixure, 4 mM	0.030994
61	Amino acid Mixure, 4 mM + Glucose, 3 mM	0.102796	0.078049	0.09284	0.069996	0.106407	0.229958	0.20511	0.105531	0.116843	0.152283	0.041346	0.127396	0.858226	0.082167	0.057347	0.04345	0.048192	0.167743	0.133547	0.050838	0.135834	0.213895	0.313664	0.049954	0.097632	0.022582	0.035256	0.021385	0.468677	0.06536	0.12366	0.064999	0.049807	0.331715	0.079935	0.451389	0.037393	0.141148	0.044716	0.081721	0.0578433	0.140454	0.155658			61	Amino acid Mixure, 4 mM + Glucose, 3 mM	0.047991
62	Amino acid Mixure, 4 mM + Glucose, 3 mM	0.092516	0.087055	0.089126	0.069996	0.089606	0.177447	0.186064	0.092161	0.127971	0.186621	0.069402	0.082432	0.740302	0.068384	0.051487	0.046564	0.051684	0.147203	0.151671	0.047449	0.247895	0.203481	0.304159	0.05793	0.105825	0.024959	0.02938	0.020259	0.41022	0.068423	0.099781	0.060735	0.13647	0.25934	0.081885	0.393518	0.041548	0.145248	0.033898	0.071336	0.0521444	0.134234	0.134206			62	Amino acid Mixure, 4 mM + Glucose, 3 mM	0.032994
63	Amino acid Mixure, 4 mM + Glucose, 3 mM	0.081553	0.068444	0.088198	0.089306	0.106407	0.186501	0.216831	0.0807	0.119625	0.23141	0.126991	0.074942	1.59853	0.112383	0.100462	0.064915	0.095686	0.189138	0.184104	0.098287	0.125645	0.253951	0.408713	0.069265	0.163858	0.022582	0.036859	0.021385	0.446115	0.080678	0.224293	0.066291	1.04096	0.355839	0.115679	0.640432	0.049857	0.334421	0.049765	0.085784	0.0965953	0.209838	0.291139			63	Amino acid Mixure, 4 mM + Glucose, 3 mM	0.031994
64	Amino acid Mixure, 4 mM + Glucose, 3 mM	0.093888	0.072646	0.086341	0.082065	0.120408	0.179863	0.213901	0.101711	0.158572	0.583751	0.18458	0.102417	3.45912	0.205682	0.136461	0.070199	0.096384	0.260172	0.273771	0.172366	0.275061	0.385332	0.560793	0.108304	0.208919	0.028525	0.067308	0.027575	0.621484	0.142974	0.419591	0.097305	0.768016	0.536772	0.206012	1.0571	0.064919	0.401188	0.066353	0.093159	0.162132	0.31593	0.549936			64	Amino acid Mixure, 4 mM + Glucose, 3 mM	0.036993
65	Amino acid Mixure, 4 mM + Glucose, 3 mM	0.102112	0.071447	0.086341	0.077237	0.137209	0.229958	0.188995	0.088818	0.147444	0.597188	0.165384	0.102417	3.18396	0.231128	0.14274	0.075011	0.11175	0.277289	0.367254	0.174787	0.230914	0.37652	0.495616	0.113762	0.254662	0.024365	0.093483	0.032077	0.690196	0.183824	0.388036	0.127285	0.374545	0.428211	0.180017	1.34259	0.194237	0.379518	0.074184	0.088945	0.184927	0.312595	0.515262			65	Amino acid Mixure, 4 mM + Glucose, 3 mM	0.032994
66	Amino acid Mixure, 4 mM + Glucose, 3 mM	0.121299	0.076248	0.090983	0.094133	0.117607	0.315048	0.268108	0.096936	0.144663	0.503131	0.115178	0.119906	2.41091	0.191369	0.204691	0.071426	0.097082	0.292694	0.291896	0.125885	0.244499	0.363702	0.433155	0.106206	0.204822	0.029713	0.060897	0.029826	0.594819	0.196079	0.295931	0.126768	0.324738	0.458367	0.169619	1.20756	0.054532	0.302209	0.057699	0.093309	0.135347	0.274122	0.400207			66	Amino acid Mixure, 4 mM + Glucose, 3 mM	0.046991
67	Amino acid Mixure, 4 mM + Glucose, 3 mM	0.112391	0.078049	0.091912	0.086892	0.145609	0.352471	0.240272	0.085953	0.147444	0.379214	0.112225	0.119906	1.72301	0.137829	0.200087	0.069586	0.085907	0.26115	0.27091	0.100708	0.268269	0.325249	0.393777	0.124676	0.235546	0.032685	0.058227	0.029826	0.53021	0.185866	0.251584	0.130903	0.265966	0.421836	0.176118	0.914351	0.05557	0.26414	0.059862	0.095717	0.0974502	0.237057	0.289034			67	Amino acid Mixure, 4 mM + Glucose, 3 mM	0.071986
68	Amino acid Mixure, 4 mM + Glucose, 3 mM	0.126095	0.088256	0.097482	0.089306	0.140009	0.289099	0.215366	0.074015	0.127971	0.223945	0.132898	0.079935	1.10718	0.099661	0.206366	0.066661	0.087304	0.282424	0.28808	0.104582	0.230914	0.342873	0.388346	0.144406	0.235546	0.030308	0.059829	0.037705	0.494316	0.193015	0.207237	0.149899	0.221141	0.397022	0.152722	0.767747	0.060244	0.289157	0.061305	0.086988	0.0866224	0.208877	0.202387			68	Amino acid Mixure, 4 mM + Glucose, 3 mM	0.054991
69	Amino acid Mixure, 4 mM + Glucose, 3 mM	0.129523	0.083452	0.095625	0.108615	0.170811	0.281252	0.234412	0.065897	0.155791	0.262763	0.124038	0.102417	1.32993	0.085878	0.197994	0.070765	0.094987	0.215669	0.351038	0.097319	0.196958	0.329254	0.370694	0.128454	0.252809	0.030308	0.05609	0.045021	0.483035	0.201184	0.211501	0.137235	0.225125	0.440275	0.144924	0.625	0.057648	0.274096	0.059862	0.11167	0.0920362	0.21296	0.220689			69	Amino acid Mixure, 4 mM + Glucose, 3 mM	0.040992
70	Amino acid Mixure, 4 mM + Glucose, 3 mM	0.127467	0.087055	0.067773	0.103787	0.159611	0.262553	0.342827	0.086908	0.172483	0.288143	0.17129	0.107417	1.13993	0.087998	0.212645	0.076285	0.076828	0.223371	0.401595	0.082794	0.268269	0.334862	0.369336	0.126775	0.230083	0.032685	0.059295	0.050648	0.53021	0.215482	0.255848	0.161916	0.182292	0.428211	0.10983	0.64429	0.060244	0.278196	0.048323	0.09647	0.127654	0.216822	0.202216			70	Amino acid Mixure, 4 mM + Glucose, 3 mM	0.052991
71	Amino acid Mixure, 4 mM + Glucose, 3 mM	0.128151	0.090058	0.09284	0.089306	0.176411	0.328334	0.256388	0.097413	0.147444	0.323975	0.160954	0.099921	1.07442	0.087468	0.21725	0.070105	0.08032	0.263595	0.424489	0.104097	0.488998	0.324448	0.355758	0.109984	0.205505	0.030308	0.061966	0.060215	0.504571	0.196079	0.257554	0.149253	0.196237	0.361868	0.133875	0.655864	0.071151	0.294009	0.053371	0.103844	0.0860525	0.21985	0.197653			71	Amino acid Mixure, 4 mM + Glucose, 3 mM	0.048991
72	Amino acid Mixure, 4 mM + Glucose, 3 mM	0.131579	0.092458	0.077986	0.137579	0.165211	0.311448	0.265178	0.089773	0.175264	0.41206	0.191964	0.124899	1.23166	0.099131	0.186274	0.065434	0.092193	0.244767	0.356761	0.103129	0.288645	0.288398	0.393777	0.102847	0.187071	0.032685	0.065171	0.053462	0.470728	0.185866	0.24732	0.138527	0.175319	0.361868	0.118928	0.829475	0.054012	0.288153	0.050486	0.0754	0.0926062	0.220866	0.221189			72	Amino acid Mixure, 4 mM + Glucose, 3 mM	0.062986
73	Amino acid Mixure, 4 mM + Glucose, 3 mM	0.130207	0.090657	0.074272	0.089306	0.201613	0.351279	0.322316	0.0807	0.150227	0.344876	0.18458	0.142388	1.1989	0.101781	0.080788	0.07888	0.070542	0.239632	0.391102	0.101192	0.339582	0.28279	0.34761	0.091933	0.176147	0.030308	0.05609	0.052899	0.425604	0.186887	0.218324	0.139561	0.18528	0.253308	0.130626	0.810185	0.059725	0.306309	0.044716	0.087289	0.0851977	0.213064	0.215967			73	Amino acid Mixure, 4 mM + Glucose, 3 mM	0.068986
74	Amino acid Mixure, 4 mM + Glucose, 3 mM	0.143914	0.094862	0.075201	0.106201	0.187612	0.298758	0.244667	0.063987	0.144663	0.315017	0.175721	0.094921	1.06787	0.088528	0.153205	0.05982	0.073336	0.197696	0.373932	0.097319	0.190166	0.300415	0.373409	0.090674	0.155665	0.030902	0.057158	0.053462	0.423552	0.179739	0.225146	0.12806	0.184284	0.307588	0.119578	0.736883	0.052974	0.308066	0.044716	0.097373	0.0906116	0.200187	0.194195			74	Amino acid Mixure, 4 mM + Glucose, 3 mM	0.045991
75	Amino acid Mixure, 4 mM + Glucose, 3 mM	0.122671	0.091259	0.084485	0.067583	0.187612	0.268587	0.237342	0.068762	0.158572	0.429975	0.209683	0.089928	1.27752	0.09701	0.162414	0.062321	0.070542	0.195129	0.329098	0.08473	0.237707	0.298812	0.357115	0.083537	0.158396	0.033279	0.055021	0.042207	0.435859	0.177696	0.197856	0.118756	0.186276	0.277434	0.126727	0.617283	0.04778	0.30748	0.045438	0.082774	0.0869073	0.201697	0.214246			75	Amino acid Mixure, 4 mM + Glucose, 3 mM	0.055991
76	Amino acid Mixure, 4 mM + Glucose, 3 mM	0.126783	0.09366	0.080771	0.074823	0.198812	0.229354	0.231482	0.067807	0.155791	0.320988	0.199347	0.099921	1.55923	0.104432	0.134368	0.067652	0.061462	0.218237	0.320513	0.077468	0.21054	0.310028	0.308232	0.074302	0.167271	0.021988	0.051282	0.041082	0.422527	0.160335	0.180799	0.113458	0.155396	0.31362	0.118928	0.50926	0.052974	0.279953	0.05265	0.045601	0.0837729	0.197485	0.245089			76	Amino acid Mixure, 4 mM + Glucose, 3 mM	0.072986
77	Amino acid Mixure, 4 mM + Glucose, 3 mM	0.128151	0.097262	0.065916	0.07241	0.190412	0.269804	0.279829	0.072105	0.158572	0.489694	0.19344	0.139885	0.943396	0.09542	0.129345	0.066755	0.060066	0.229362	0.280449	0.070689	0.203748	0.301216	0.309591	0.088155	0.14201	0.024365	0.055556	0.040519	0.417399	0.152165	0.214912	0.102862	0.124516	0.283464	0.103981	0.725308	0.068554	0.291667	0.046159	0.095416	0.0792138	0.192774	0.183166			77	Amino acid Mixure, 4 mM + Glucose, 3 mM	0.073986
78	Amino acid Mixure, 4 mM + Glucose, 3 mM	0.115132	0.102666	0.062203	0.050687	0.190412	0.287286	0.238807	0.073538	0.155791	0.368764	0.168337	0.147381	1.09407	0.104962	0.133949	0.062934	0.071241	0.201487	0.259463	0.080373	0.281853	0.272376	0.342179	0.086476	0.116749	0.026148	0.056624	0.040519	0.353815	0.147059	0.208942	0.105446	0.144439	0.31362	0.115029	0.675154	0.076344	0.30338	0.06996	0.092707	0.0783591	0.192114	0.191224			78	Amino acid Mixure, 4 mM + Glucose, 3 mM	0.069986
79	Amino acid Mixure, 4 mM + Glucose, 3 mM	0.119928	0.103265	0.075201	0.082065	0.15401	0.260144	0.304735	0.07115	0.155791	0.392651	0.221496	0.114906	0.949943	0.089059	0.080369	0.062604	0.068447	0.236209	0.268048	0.079889	0.224125	0.26757	0.304159	0.082278	0.135183	0.024365	0.047543	0.036579	0.389709	0.147059	0.187622	0.111907	0.131489	0.295526	0.122178	0.64429	0.099715	0.299866	0.062026	0.056136	0.0794988	0.186311	0.174381			79	Amino acid Mixure, 4 mM + Glucose, 3 mM	0.061986
80	Amino acid Mixure, 4 mM + Glucose, 3 mM	0.113076	0.117075	0.06406	0.074823	0.15681	0.230561	0.227086	0.06542	0.150227	0.262763	0.19344	0.084935	0.910642	0.085878	0.107578	0.056046	0.076828	0.148914	0.230845	0.078921	0.241103	0.288398	0.315022	0.081018	0.118797	0.030308	0.051816	0.038268	0.378428	0.140932	0.231116	0.113975	0.129497	0.277434	0.100732	0.501543	0.050896	0.247741	0.064911	0.079614	0.0777892	0.170616	0.156784			80	Amino acid Mixure, 4 mM + Glucose, 3 mM	0.058991
81	Amino acid Mixure, 4 mM + Glucose, 16.7 mM	0.110336	0.106867	0.084485	0.09896	0.170811	0.248066	0.253458	0.0616	0.14188	0.249326	0.186057	0.094921	0.949943	0.099131	0.087486	0.059207	0.064955	0.175078	0.247062	0.08231	0.247895	0.264365	0.320453	0.07766	0.124259	0.033873	0.052885	0.03883	0.404067	0.155229	0.179094	0.112424	0.127505	0.349806	0.096182	0.466821	0.0483	0.275853	0.054093	0.09662	0.0746549	0.174947	0.162134			81	Amino acid Mixure, 4 mM + Glucose, 16.7 mM	0.053991
82	Amino acid Mixure, 4 mM + Glucose, 16.7 mM	0.128493	0.112571	0.087535	0.155164	0.138009	0.266427	0.345339	0.085953	0.250378	0.345516	0.297438	0.097424	1.05477	0.09489	0.077439	0.065246	0.070343	0.212735	0.292305	0.084039	0.331093	0.345048	0.340433	0.074662	0.147765	0.028015	0.058379	0.045825	0.413151	0.172882	0.232091	0.095625	0.128074	0.284325	0.103053	0.432099	0.053419	0.889809	0.089639	0.095459	0.105021	0.212875	0.208172			82	Amino acid Mixure, 4 mM + Glucose, 16.7 mM	0.070701
83	Amino acid Mixure, 4 mM + Glucose, 16.7 mM	0.118214	0.148594	0.06963	0.103443	0.204013	0.297467	0.235458	0.12586	0.268261	0.796606	0.35123	0.379698	3.89151	0.199852	0.322316	0.089542	0.140685	0.254915	1.58008	0.380769	0.35656	0.872061	1.05331	0.251871	0.908532	0.118429	0.208333	0.174857	0.731804	0.623687	0.809576	0.216319	0.106728	0.710814	0.157364	0.810185	0.080128	0.94001	0.177732	0.081914	0.376734	0.4811	0.644752			83	Amino acid Mixure, 4 mM + Glucose, 16.7 mM	0.081412
84	Amino acid Mixure, 4 mM + Glucose, 16.7 mM	0.186747	0.112571	0.111408	0.124131	0.138009	0.293593	0.185227	0.36223	0.727287	3.07765	0.813209	1.38389	3.32154	0.661578	0.837184	0.139974	0.320282	0.911458	3.24601	1.59363	1.2989	1.34242	2.6129	0.802389	1.73514	0.555216	0.884844	0.911669	1.41526	2.94774	2.48721	0.878199	0.153689	1.43455	0.948362	3.82716	0.455173	2.16365	0.187005	0.112229	1.22118	1.14445	1.03708			84	Amino acid Mixure, 4 mM + Glucose, 16.7 mM	0.079271
85	Amino acid Mixure, 4 mM + Glucose, 16.7 mM	0.327234	0.151597	0.081567	0.124131	0.204013	0.30524	0.354757	0.513671	0.947858	3.85506	1.22456	1.73361	21.6195	0.741094	0.837184	0.29212	0.371169	1.27091	3.98188	1.84885	1.41775	1.10724	2.5227	1.04616	1.21723	0.455888	0.910027	1.06482	1.69436	4.00473	2.80702	1.03378	0.271089	1.40871	1.3926	4.07407	0.727831	1.90135	0.163823	0.277348	0.984271	1.73826	3.37208			85	Amino acid Mixure, 4 mM + Glucose, 16.7 mM	0.068561
86	Amino acid Mixure, 4 mM + Glucose, 16.7 mM	0.584211	0.313689	0.087535	0.625827	1.20008	0.399652	0.313944	0.520833	0.798824	2.74493	1.38594	1.249	13.8758	0.572519	0.837184	0.36982	0.308309	1.23239	3.88785	1.51374	1.03572	0.96476	2.01059	0.782599	0.885124	0.244499	0.658196	0.912875	1.50756	2.69827	2.33735	0.707625	0.373548	1.00806	1.38843	3.15586	0.539753	1.39684	0.153004	0.181459	1.01724	1.38491	2.17492			86	Amino acid Mixure, 4 mM + Glucose, 16.7 mM	0.182109
87	Amino acid Mixure, 4 mM + Glucose, 16.7 mM	0.591086	0.327205	0.097482	1.48957	3.74424	0.88078	0.803697	0.577112	0.619983	2.17227	1.23089	1.07164	9.39465	0.349873	0.837184	0.397418	0.200551	0.87478	2.84537	0.938953	0.814995	0.811978	1.69925	0.538824	0.656894	0.165546	0.508242	0.586073	1.37131	1.9761	1.87683	0.784125	0.388491	0.878826	0.930259	3.14815	0.378383	1.49096	0.120549	0.158239	0.700957	1.2056	1.54708			87	Amino acid Mixure, 4 mM + Glucose, 16.7 mM	0.617014
88	Amino acid Mixure, 4 mM + Glucose, 16.7 mM	0.563651	0.297205	0.159155	0.941328	3.1322	1.22868	1.19927	0.751064	0.506717	1.97072	1.31949	1.01169	8.29403	0.340331	0.765605	0.353827	0.190074	0.774648	2.39567	0.880852	1.04421	0.875494	1.34427	0.607189	0.653968	0.161726	0.475046	0.517336	0.986727	1.68724	1.42909	0.71021	0.397029	0.736663	0.799354	1.95216	0.280449	1.25628	0.106639	0.644995	0.530603	1.07983	1.31691			88	Amino acid Mixure, 4 mM + Glucose, 16.7 mM	1.01122
89	Amino acid Mixure, 4 mM + Glucose, 16.7 mM	0.483158	0.270173	0.320299	0.651688	2.22614	1.23516	1.30287	0.80325	0.530562	1.86835	1.33214	1.04167	8.05818	0.305344	0.726676	0.327361	0.142182	0.62989	1.9194	0.761537	0.959318	0.932144	1.30645	0.550518	0.655431	0.164273	0.476191	0.44257	1.03288	1.7879	1.62646	0.578919	0.288166	0.827129	0.635027	1.84414	0.241497	1.26004	0.112821	0.643383	0.605705	1.02212	1.25232			89	Amino acid Mixure, 4 mM + Glucose, 16.7 mM	0.897692
90	Amino acid Mixure, 4 mM + Glucose, 16.7 mM	0.383783	0.273176	0.568977	0.434459	1.76411	1.24678	1.32798	0.92604	0.572292	1.82676	1.02838	1.14658	8.84434	0.375318	0.748024	0.29863	0.160141	0.867444	1.59848	0.775025	0.899892	0.933861	1.40247	0.549619	0.71834	0.220304	0.525412	0.418451	1.07903	1.91702	1.49488	0.643014	0.217725	0.814206	0.580715	1.74383	0.247062	1.62525	0.149913	0.518898	0.468323	1.03256	1.35136			90	Amino acid Mixure, 4 mM + Glucose, 16.7 mM	0.84629
91	Amino acid Mixure, 4 mM + Glucose, 16.7 mM	0.392336	0.271674	0.795773	0.449975	1.29608	1.19635	1.21182	0.955714	0.584214	2.0379	1.04103	1.18155	10.2201	0.330789	0.832162	0.279099	0.148168	0.707893	1.59234	0.845576	0.696142	0.99051	1.41411	0.48845	0.722729	0.212663	0.517399	0.422069	1.03947	2.02644	1.56981	0.599595	0.221995	0.943444	0.580715	2.07562	0.313835	1.42319	0.136004	0.281218	0.457943	1.06107	1.55899			91	Amino acid Mixure, 4 mM + Glucose, 16.7 mM	0.638462
92	Amino acid Mixure, 4 mM + Glucose, 16.7 mM	0.370066	0.282182	0.829593	0.563762	1.16407	0.858778	0.929275	0.709111	0.506717	1.57722	1.12647	1.06415	7.11478	0.283079	0.620772	0.341231	0.152658	0.597858	1.6598	0.994978	0.696142	0.978494	1.60905	0.617984	0.756379	0.236858	0.521978	0.426893	0.9186	1.98704	1.81835	0.622855	0.247609	0.904672	0.548685	1.85185	0.257078	1.20482	0.12364	0.311533	0.515949	0.948854	1.10375			92	Amino acid Mixure, 4 mM + Glucose, 16.7 mM	0.59991
93	Amino acid Mixure, 4 mM + Glucose, 16.7 mM	0.371776	0.309193	0.879329	0.610311	1.43409	0.738515	1.0266	0.775622	0.584214	2.02831	1.09483	1.20904	8.88365	0.295802	0.763093	0.302593	0.184088	0.667058	1.69864	1.03025	1.14609	1.02313	1.66434	0.616184	0.744675	0.230491	0.560897	0.414834	1.06584	2.04175	1.84759	0.69522	0.226264	0.840055	0.537545	1.81327	0.241497	1.4006	0.163823	0.451819	0.533656	1.05236	1.36133			93	Amino acid Mixure, 4 mM + Glucose, 16.7 mM	0.685611
94	Amino acid Mixure, 4 mM + Glucose, 16.7 mM	0.428322	0.285182	0.887287	0.605139	1.4941	0.96742	1.02032	0.848273	0.679596	2.24905		1.31645	10.2201	0.343511	0.738815	0.313632	0.155651	0.73907	1.80084	0.93584	1.48567	1.08149	1.50431	0.611687	0.765157	0.240678	0.536859	0.402774	0.850475	2.02644	1.54971	0.748977	0.298839	0.878826	0.704657	1.875	0.237046	1.36797	0.202461	0.423117	0.534877	1.10889	1.57321			94	Amino acid Mixure, 4 mM + Glucose, 16.7 mM	0.647014
95	Amino acid Mixure, 4 mM + Glucose, 16.7 mM	0.404342	0.289683	0.827604	0.55859	1.69811	1.01656	1.00462	0.734692	0.619983	2.40901	1.0885	1.38389	8.6478	0.349873	0.673096	0.308962	0.172114	0.634536	1.81719	0.950365	0.806506	1.12441	1.53922	0.609888	0.760768	0.227944	0.543727	0.419657	0.991122	1.95422	1.5826	0.816172	0.232667	1.00806	0.661486	2.06019	0.250401	1.43825	0.204006	0.542118	0.53793	1.07075	1.33532			95	Amino acid Mixure, 4 mM + Glucose, 16.7 mM	0.689864
96	Amino acid Mixure, 4 mM + Glucose, 16.7 mM	0.356349	0.375245	0.835561	0.543073	1.4881	1.15624	0.979506	0.816552	0.751133	2.39942	0.889151	1.54627	8.37264	0.423028	0.748443	0.282071	0.178101	0.733568	1.49832	1.14438	1.17156	1.04029	1.3821	0.631477	0.721266	0.224124	0.520833	0.423275	1.27242	2.14242	2.0742	0.698321	0.239071	0.775434	0.676805	1.84414	0.260417	1.45833	0.151459	0.341202	0.550142	1.07601	1.29859			96	Amino acid Mixure, 4 mM + Glucose, 16.7 mM	0.781991
97	Amino acid Mixure, 4 mM + Glucose, 16.7 mM	0.356349	0.337723	0.825614	0.610311	1.6261	1.15885	0.995203	0.714227	0.637867	2.68735	1.03154	1.68865	8.80503	0.381679	0.566774	0.280656	0.181094	0.7299	1.63731	1.04893	0.687653	1.05403	1.63524	0.660262	0.769546	0.235585	0.531136	0.429305	0.995517	2.31968	1.64839	0.713828	0.309511	0.852978	0.665664	1.96759	0.352787	1.55497	0.134458	0.561468	0.66249	1.09862	1.37042			97	Amino acid Mixure, 4 mM + Glucose, 16.7 mM	0.837692
98	Amino acid Mixure, 4 mM + Glucose, 16.7 mM	0.392336	0.366225	0.835561	0.605139	1.6081	0.970002	1.16159	0.624181	0.703441	2.09549	1.06635	1.43386	8.56918	0.292621	0.699468	0.28943	0.182591	0.715229	1.69046	1.20663	0.585778	1.13471	1.59742	0.655764	0.712488	0.238132	0.657051	0.406392	1.02848	2.2781	1.79094	0.68695	0.256148	0.814206	0.715798	1.89043	0.363248	1.43951	0.131367	0.466654	0.602042	1.07218	1.32126			98	Amino acid Mixure, 4 mM + Glucose, 16.7 mM	0.704887
99	Amino acid Mixure, 4 mM + Glucose, 16.7 mM	0.383783	0.360231	0.793783	0.687893	1.83012	0.941569	1.05171	0.579159	0.69748	1.97072	1.02205	1.39389	11.3994	0.381679	0.837184	0.295092	0.179598	0.717063	1.86216	1.19107	0.636716	1.13814	1.69053	0.600892	0.785639	0.268694	0.614698	0.454629	1.08782	2.2781	1.81469	0.692118	0.275359	0.801283	0.611352	2.04475	0.332755	1.56627	0.129822	0.346685	0.628297	1.15548	1.73705			99	Amino acid Mixure, 4 mM + Glucose, 16.7 mM	0.856968
100	Amino acid Mixure, 4 mM + Glucose, 16.7 mM	0.351217	0.360231	0.773889	0.703409	1.79411	1.13169	1.27461	0.657949	0.78094	2.64576	1.10115	1.6287	9.55189	0.368956	0.837184	0.295941	0.178101	0.737236	1.77836	1.12571	0.619736	1.22398	1.5014	0.729526	0.835381	0.264874	0.641026	0.451011	1.11638	2.27591	2.18019	0.90301	0.251878	0.762511	0.731116	2.01389	0.303819	1.53991	0.115912	0.444079	0.663711	1.1621	1.47964			100	Amino acid Mixure, 4 mM + Glucose, 16.7 mM	0.700588
101	Amino acid Mixure, 4 mM + Glucose, 16.7 mM + IBMX, 0.1 mM	0.42148	0.370749	0.803731	0.687893	1.81212	1.12004	1.28089	0.56074	0.751133	2.66175	1.05686	1.61621	8.33333	0.302163	1.40396	0.311509	0.172114	0.762911	1.80902	1.20352	0.534841	1.23428	1.76618	0.653965	0.814899	0.286522	0.705128	0.460658	1.06584	2.21901	1.7818	0.773012	0.271089	1.03391	0.753398	2.10648	0.34188	1.6491	0.156096	0.482456	0.637456	1.15049	1.30638			101	Amino acid Mixure, 4 mM + Glucose, 16.7 mM + IBMX, 0.1 mM	0.692036
102	Amino acid Mixure, 4 mM + Glucose, 16.7 mM + IBMX, 0.1 mM	0.406053	0.388761	0.738079	0.718926	1.70411	1.22222	1.69216	0.611902	0.78094	2.52419	0.863837	2.03088	9.27673	0.340331	1.23066	0.279382	0.170618	0.838101	1.92144	1.2554	0.721611	1.29093	1.82437	0.636874	0.762231	0.297983	0.673077	0.444981	1.16034	2.4663	1.95541	0.821083	0.239071	0.891749	0.880125	2.02161	0.332755	1.76205	0.136004	0.455366	0.573955	1.20348	1.44829			102	Amino acid Mixure, 4 mM + Glucose, 16.7 mM + IBMX, 0.1 mM	0.824842
103	Amino acid Mixure, 4 mM + Glucose, 16.7 mM + IBMX, 0.1 mM	0.402632	0.400749	0.70028	0.677549	1.75211	1.09806	1.74239	0.688646	1.07305	3.44236	1.28468	2.80526	12.9717	0.458015	1.54712	0.357224	0.297833	1.01049	2.97619	1.59155	0.959318	1.51066	2.09497	0.910334	1.02557	0.495365	0.75435	0.578838	1.72293	3.43137	2.76498	0.983904	0.360741	0.904672	1.36754	2.51543	0.732283	2.14232	0.187005	0.433437	0.69302	1.55724	2.02856			103	Amino acid Mixure, 4 mM + Glucose, 16.7 mM + IBMX, 0.1 mM	0.904118
104	Amino acid Mixure, 4 mM + Glucose, 16.7 mM + IBMX, 0.1 mM	0.621908	0.472795	0.716196	0.734442	1.5481	1.08642	1.1145	0.816552	1.40688	3.53834	1.64857	3.19245	12.8538	0.547074	1.37633	0.42714	0.408585	1.3406	3.81631	2.28959	1.45171	2.12007	2.49942	0.93822	1.76001	0.86466	1.10005	0.864639	2.2108	3.44013	2.55665	1.4243	0.593409	1.29239	1.49705	3.82716	1.31878	2.27661	0.378647	0.433007	1.01602	1.80049	2.01882			104	Amino acid Mixure, 4 mM + Glucose, 16.7 mM + IBMX, 0.1 mM	0.87629
105	Amino acid Mixure, 4 mM + Glucose, 16.7 mM + IBMX, 0.1 mM	0.854934	0.498329	0.598819	0.874089	2.46616	1.14462	1.29345	0.892272	1.52015	4.56209	1.87323	4.43395	15.684	0.67112	1.96403	0.601223	0.496887	2.4006	3.42998	2.32196	2.16483	2.57842	2.70892	1.13702	1.96629	1.06713	1.26145	0.805549	2.31628	4.85819	3.02083	1.3297	0.94988	1.26654	1.35361	3.95062	1.19079	2.46612	0.548652	0.466116	1.04838	2.12286	2.46701			105	Amino acid Mixure, 4 mM + Glucose, 16.7 mM + IBMX, 0.1 mM	1.0605
106	Amino acid Mixure, 4 mM + Glucose, 16.7 mM + IBMX, 0.1 mM	0.928586	0.631902	0.555052	1.01891	3.61223	1.18729	1.51007	0.801203	1.48438	4.9364	2.15484	5.05845	17.8459	0.986005	2.49899	0.65274	0.440014	2.09434	3.5792	2.01693	2.60629	3.08655	3.25594	0.988594	2.15356	1.07987	1.10577	0.774195	2.92502	5.83567	2.99464	1.76777	0.858094	1.49917	1.40931	4.30556	1.12513	2.25151	0.383284	0.479446	1.0665	2.34013	2.83474			106	Amino acid Mixure, 4 mM + Glucose, 16.7 mM + IBMX, 0.1 mM	1.45045
107	Amino acid Mixure, 4 mM + Glucose, 16.7 mM + IBMX, 0.1 mM	1.0348	0.763977	0.889276	0.832713	5.35234	1.61023	3.11119	0.740832	1.50226	5.07397	2.07574	5.24581	16.2736	1.11641	2.37342	0.59075	0.448994	1.93662	3.70593	1.86027	2.5129	3.14148	2.88641	0.870754	2.50615	1.18302	1.14812	0.723547	2.4811	5.58474	3.57639	2.02105	0.851691	1.43455	1.58617	4.12037	0.955974	2.43976	0.346192	0.466116	1.14058	2.40283	2.64915			107	Amino acid Mixure, 4 mM + Glucose, 16.7 mM + IBMX, 0.1 mM	1.50828
108	Amino acid Mixure, 4 mM + Glucose, 16.7 mM + IBMX, 0.1 mM	1.14618	0.77	2.3336	1.21545	5.46035	2.46126	2.47702	0.854412	1.53207	5.30751	1.60427	5.75789	14.3082	1.15776	2.61453	0.5899	0.438518	1.84676	3.59964	2.07503	2.44499	2.82905	3.16865	1.11003	2.37447	1.19448	1.14583	0.698223	2.46792	5.83567	3.30775	1.86598	0.802595	1.77058	1.54997	4.27469	1.05613	2.49498	0.398739	0.594255	1.19431	2.44219	2.39694			108	Amino acid Mixure, 4 mM + Glucose, 16.7 mM + IBMX, 0.1 mM	1.81466
109	Amino acid Mixure, 4 mM + Glucose, 16.7 mM + IBMX, 0.1 mM	1.22842	0.78049	2.96226	1.77404	4.10426	2.45994	2.64027	0.755157	1.36515	4.08861	1.6897	4.09672	15.2516	1.01781	1.89873	0.564	0.422055	1.71288	3.52196	2.05532	2.79306	2.85651	3.20356	0.992192	2.92603	0.971628	1.05082	0.716312	2.63713	4.47596	3.7963	2.06757	0.858094	1.77058	1.59314	4.35957	1.04946	2.46988	0.35701	0.561575	1.29282	2.37045	2.38937			109	Amino acid Mixure, 4 mM + Glucose, 16.7 mM + IBMX, 0.1 mM	1.73326
110	Amino acid Mixure, 4 mM + Glucose, 16.7 mM + IBMX, 0.1 mM	1.16845	0.903573	2.63799	2.19815	5.60436	1.71887	2.65597	0.646693	1.47246	3.85506	1.74666	4.58383	13.4434	0.966921	1.7832	0.581975	0.462464	1.33876	3.36457	2.06051	2.72514	2.82733	3.04353	1.24496	2.2428	1.1983	1.22825	0.77299	2.78217	4.89904	2.31238	1.79465	0.907189	1.56379	1.57643	4.38272	1.03276	2.89157	0.435831	0.495356	1.30829	2.31364	2.18993			110	Amino acid Mixure, 4 mM + Glucose, 16.7 mM + IBMX, 0.1 mM	1.79109
111	Amino acid Mixure, 4 mM + Glucose, 16.7 mM + IBMX, 0.1 mM	1.34661	0.839049	2.65589	2.27574	5.77837	2.13015	2.59318	0.699902	1.41284	4.28056	1.83842	4.22163	14.6619	1.01463	2.02682	0.590608	0.451988	1.50748	3.85924	2.19123	2.52988	3.04535	3.20356	1.21078	2.28962	1.15882	1.16987	0.811579	2.91403	4.71814	3.57456	1.44833	0.907189	1.83519	1.78253	4.49846	1.02164	3.21285	0.408012	0.516856	1.21548	2.43534	2.36327			111	Amino acid Mixure, 4 mM + Glucose, 16.7 mM + IBMX, 0.1 mM	1.61968
112	Amino acid Mixure, 4 mM + Glucose, 16.7 mM + IBMX, 0.1 mM	1.53681	0.882565	2.85086	2.39987	5.32834	2.53489	4.19743	0.708088	1.61553	5.00038	2.20231	4.70873	14.9764	0.998727	2.15742	0.584381	0.413075	1.45246	3.83675	1.83329	2.62327	2.99556	3.18901	1.27375	2.35253	1.18429	1.18475	0.776607	2.88986	4.67145	2.76681	1.6003	0.806865	1.77058	1.69897	4.21296	0.987135	3.16432	0.40183	0.556416	1.38075	2.50503	2.41212			112	Amino acid Mixure, 4 mM + Glucose, 16.7 mM + IBMX, 0.1 mM	1.79326
113	Amino acid Mixure, 4 mM + Glucose, 16.7 mM + IBMX, 0.1 mM	1.35007	0.890058	3.27262	2.30677	6.04239	2.47288	3.29013	0.732646	1.51419	4.37334	2.12004	5.58304	16.8239	1.1514	2.03938	0.629246	0.416068	1.59184	4.03094	2.07503	3.02228	3.05908	3.125	1.20898	2.47249	0.902863	1.30723	0.786254	2.34045	5.72187	3.31871	1.15577	0.779116	1.70596	1.731	4.12809	0.928152	3.15596	0.465195	0.634675	1.03882	2.5779	2.71593			113	Amino acid Mixure, 4 mM + Glucose, 16.7 mM + IBMX, 0.1 mM	1.69041
114	Amino acid Mixure, 4 mM + Glucose, 16.7 mM + IBMX, 0.1 mM	1.67214	0.858559	3.19503	2.0792	5.45435	2.5699	2.47074	0.785855	1.63938	3.86466	2.0884	5.44564	16.3915	1.13868	2.24784	0.597968	0.396611	1.29291	3.57511	2.07503	2.81004	3.14663	2.40049	1.45366	2.58661	1.15118	1.28091	0.735606	2.758	5.25794	3.5307	1.77707	0.815403	2.09367	1.93154	5.16204	1.01607	3.06016	0.51156	0.627365	1.05917	2.56111	2.61009			114	Amino acid Mixure, 4 mM + Glucose, 16.7 mM + IBMX, 0.1 mM	2.00964
115	Amino acid Mixure, 4 mM + Glucose, 16.7 mM + IBMX, 0.1 mM	1.87089	0.846542	2.60616	2.3378	5.38234	2.26337	2.84119	0.728553	1.59765	3.87106	2.05675	4.29656	16.9025	0.979644	1.6526	0.64906	0.489404	1.579	3.75703	2.07503	2.69118	2.62305	2.82821	1.09204	2.15941	1.20212	1.24084	0.833285	2.62834	4.68896	3.29435	1.72539	0.779116	1.95151	1.8076	5.35494	1.10288	3.10618	0.51156	0.594255	1.16134	2.4917	2.6428			115	Amino acid Mixure, 4 mM + Glucose, 16.7 mM + IBMX, 0.1 mM	1.68828
116	Amino acid Mixure, 4 mM + Glucose, 16.7 mM + IBMX, 0.1 mM	2.44141	0.908069	2.85484	2.50848	5.16033	1.95555	2.57748	0.652832	1.40688	4.21657	2.21813	4.69625	14.9764	0.833334	2.11473	0.58339	0.460968	1.43596	3.88785	2.41534	2.80155	3.15693	3.38687	1.03627	2.04676	1.155	1.38851	0.862227	2.52945	5.83567	3.56908	1.47418	0.813268	1.93859	1.9385	4.67593	1.13738	3.34672	0.381738	0.436339	1.13509	2.52075	2.42933			116	Amino acid Mixure, 4 mM + Glucose, 16.7 mM + IBMX, 0.1 mM	1.97534
117	Amino acid Mixure, 4 mM + Glucose, 16.7 mM + IBMX, 0.1 mM	2.92796	0.918588	2.77725	2.34297	5.83837	1.95297	2.85061	0.586321	1.4665	4.48211	1.9903	5.02099	13.6792	1.02417	2.45128	0.635473	0.471444	1.41762	3.4729	2.07503	2.48744	3.2977	3.59928	1.24496	2.62758	1.18811	1.35188	0.816402	2.97117	5.53221	3.35344	1.72642	0.808999	1.88689	1.69062	3.52623	0.941506	3.34672		0.402477	1.14974	2.5583	2.26966			117	Amino acid Mixure, 4 mM + Glucose, 16.7 mM + IBMX, 0.1 mM	1.88109
118	Amino acid Mixure, 4 mM + Glucose, 16.7 mM + IBMX, 0.1 mM	2.79434	0.95611	3.18707	2.00161	5.13633	2.58679	2.60574	0.67739	1.64534	5.16674	2.32571	5.47063	16.077	1.05598	2.33323	0.654863	0.363685	1.54049	3.83062	2.07503	2.68269	3.42644	3.44507	1.32412	2.5793	1.0786	1.37363	0.795902	3.01952	5.28711	3.6769	1.70057	0.678791	1.79642	1.72404	3.62654	0.951522	2.8238		0.547278	1.1705	2.65484	2.58052			118	Amino acid Mixure, 4 mM + Glucose, 16.7 mM + IBMX, 0.1 mM	1.98819
119	Amino acid Mixure, 4 mM + Glucose, 16.7 mM + IBMX, 0.1 mM	2.48253	0.900576	3.388	2.13092	5.82637	2.58679	2.83178	0.675344	1.57976	4.97159	2.4333	5.43315	17.4921	1.28499	2.2604	0.835881	0.408585	1.76423	4.05547	2.46016	2.86098	3.26165	3.73894	1.32592	2.30132	1.23523	1.52816	0.82605	2.98655	5.29587	3.58918	1.73056	0.78125	2.14537	1.64466	3.63426	0.933716	3.11245	0.383284	0.557276	1.20592	2.7044	2.7611			119	Amino acid Mixure, 4 mM + Glucose, 16.7 mM + IBMX, 0.1 mM	1.97321
120	Amino acid Mixure, 4 mM + Glucose, 16.7 mM + IBMX, 0.1 mM	3.42665	0.909568	3.96295	2.22402	5.05832	2.58679	2.85689	0.785855	1.7586	5.63703	1.97448	5.05845	12.8538	1.10369	2.39853	0.710343	0.462464	1.7569	3.37888	2.07503	2.88645	3.31314	3.1861	1.35291	2.49737	1.46954	1.54533	0.841727	2.74481	5.22	2.93372	1.95799	0.834614	1.89981	1.95382	3.75	0.96599	3.38019	0.397193	0.432792	1.0551	2.57556	2.14702			120	Amino acid Mixure, 4 mM + Glucose, 16.7 mM + IBMX, 0.1 mM	2.08461
121	No Stimuli	2.64872	0.945591	3.48151	2.41538	4.88431	2.38105	3.14258	0.862598	1.6513	4.58448	2.17699	3.90937	18.5928	1.2341	2.3684	0.721099	0.453484	1.74406	3.44633	2.44024	2.69118	3.01273	3.19192	1.31962	2.52955	1.33838	1.40682	0.847756	3.05907	5.64601	3.0848	1.64061	0.768443	2.14537	1.85355	3.34105	0.939281	2.69411	0.43274	0.498904	1.22118	2.62799	2.84376			121	No Stimuli	2.12534
122	No Stimuli	3.42665	1.08669	3.74411	2.4309	4.97432	2.10688	6.27888	0.754134	1.35323	3.81347	2.03777	4.97102	11.9104	1.0687	2.1524	0.595279	0.411578	1.32226	3.13563	2.04391	2.4365	3.43331	3.26175	1.03267	2.54126	1.10916	1.34844	0.856197	2.9426	4.89613	3.37963	1.35322	0.723617	2.01613	1.77	4.22068	0.977119	2.91834	0.361647	0.441499	1.0551	2.50471	2.09738			122	No Stimuli	2.17244
123	No Stimuli	3.36842	0	2.19036	2.41538	5.55636	2.10688	2.96363	0.853389	1.39496	3.67271	1.96816	3.95933	13.2075	0.830153	1.86357	0.547016	0.423551	1.64136	2.40385	2.07503	1.91015	3.3492	2.96206	1.40508	2.30279	1.18938	1.31868	0.822432	1.89434	5.29003	2.68275	1.4411	0.616889	1.48625	1.54579	3.50309	0.725605	3.24297	0.347737	0.546956	1.2053	2.27391	2.16453			123	No Stimuli	2.55167
124	No Stimuli	1.59905	0.54634	1.8568	2.72985	4.00426	1.53961	2.93014	0.618861	0.929179	2.98594	1.51504	3.63209	13.0896	0.683842	0.699468	0.428508	0.273787	1.6081	1.67983	0.968349	1.19533	1.60221	2.22824	0.83957	1.36548	0.638244	1.06838	0.608342	1.58037	3.13375	2.05653	1.35736	0.417378	1.73697	1.19643	3.24074	0.368738	2.00803	0.24594	0.290893	0.569884	1.75774	2.06289			124	No Stimuli	1.49471
125	No Stimuli	1.59905	0.555447	1.8568	1.96472	4.20867	1.45545	2.52432	0.420214	0.66211	2.63061	1.1946	1.66866	12.9324	0.658397	0.837184	0.265889	0.206737	0.957673	0.910027	2.45518	0.757267	1.20486	1.99876	0.709017	1.23098	0.365475	0.982906	0.361854	1.2204	2.6348	1.70443	1.0679	0.328723	1.41732	0.939728	3.04784	0.242536	1.37216	0.144247	0.204893	0.739221	1.52779	2.03271			125	No Stimuli	1.16878
126	No Stimuli	1.59507	0.445476	1.8568	1.84645	4.53069	1.20713	2.71771	0.346676	0.517447	2.01551	1.12225	1.03916	9.55189	0.464376	0.837184	0.165402	0.148767	0.876369	0.708753	0.928647	0.835372	0.886023	1.53573	0.491568	0.805634	0.330413	0.729167	0.190213	0.860437	2.83964	1.37646	0.752595	0.288877	1.00117	0.670677	2.1875	0.116854	1.03606	0.097366	0.171117	0.556777	1.23613	1.59592			126	No Stimuli	1.16579
127	No Stimuli	0.964243	0.374726	1.66462	1.03787	3.80824	1.20713	2.2064	0.286987	0.397822	1.23319	0.812154	0.731914	5.3066	0.368956	0.675608	0.120867	0.128512	0.551154	0.447383	0.678813	0.675768	0.566382	1.41488	0.302665	0.54073	0.204428	0.555556	0.083288	0.776342	2.13936	1.02766	0.507588	0.201218	0.615179	0.457516	1.57022	0.153727	0.624916	0.118694	0.097523	0.46759	0.880596	1.00527			127	No Stimuli	0.866833
128	No Stimuli	0.752368	0.334813	1.47709	0.731339	2.14774	1.20713	1.26289	0.198647	0.269851	0.7644	0.702882	0.419662	3.14465	0.197201	0.265388	0.089966	0.099876	0.327783	0.343407	0.576168	0.502582	0.424586	1.15553	0.193941	0.348197	0.131333	0.565705	0.052337	0.668659	1.58613	0.896321	0.248625	0.174323	0.51868	0.358084	1.23457	0.124125	0.585676	0.089021	0.078861	0.300614	0.623199	0.624226			128	No Stimuli	0.719864
129	No Stimuli	0.653224	0.318012	0.721368	0.523765	1.73051	1.06591	1.24678	0.143255	0.25316	0.491187	0.524208	0.314748	1.57233	0.152672	0.229807	0.090391	0.079622	0.245623	0.204136	0.494826	0.370144	0.342873	1.03468	0.162877	0.294944	0.098648	0.435363	0.033203	0.552772	1.42157	0.716374	0.185435	0.140454	0.307588	0.263852	0.74074	0.09556	0.430472	0.080778	0.046956	0.252459	0.464958	0.42621			129	No Stimuli	0.557919
130	No Stimuli	0.570066	0.297695	0.525475	0.492386	1.24888	0.813608	1.14422	0.135137	0.247596	0.373243	0.481386	0.292266	0.930292	0.090649	0.23483	0.078172	0.064955	0.202832	0.134501	0.314713	0.35656	0.283592	0.798417	0.099069	0.217794	0.071906	0.367521	0.023073	0.488162	0.918096	0.565424	0.138398	0.146431	0.392025	0.185866	0.543982	0.056609	0.330907	0.053371	0.042742	0.190911	0.364482	0.307095			130	No Stimuli	0.456923
131	No Stimuli	0.520493	0.261268	0.38343	0.229298	1.01367	0.640973	0.726676	0.116036	0.222558	0.395637	0.339628	0.229813	0.877887	0.072625	0.171204	0.064774	0.074732	0.147203	0.114469	0.312292	0.288645	0.241133	0.801133	0.086476	0.170002	0.060615	0.270299	0.023636	0.41945	0.910948	0.453704	0.100148	0.132485	0.199027	0.171569	0.42824	0.046741	0.319779	0.055535	0.035518	0.152729	0.299573	0.258913			131	No Stimuli	0.313941
132	No Stimuli	0.472533	0.24796	0.285019	0.181025	0.761649	0.492501	0.59775	0.114604	0.208648	0.274706	0.296806	0.214827	0.661689	0.054602	0.147763	0.062274	0.070542	0.112114	0.083944	0.241603	0.278457	0.230719	0.649054	0.074722	0.152934	0.052296	0.228098	0.019696	0.340483	0.709763	0.332602	0.071202	0.144439	0.235216	0.124127	0.439815	0.03999	0.261797	0.054093	0.044096	0.128224	0.248643	0.200492			132	No Stimuli	0.243955
133	No Stimuli	0.434145	0.22064	0.207962	0.166542	0.526433	0.389297	0.685654	0.101711	0.175264	0.255298	0.259889	0.192345	0.537208	0.052481	0.189204	0.064915	0.069844	0.127519	0.083944	0.235309	0.244499	0.20268	0.560793	0.071363	0.129721	0.055861	0.20406	0.02251	0.384581	0.537173	0.261818	0.058538	0.17233	0.217122	0.10723	0.33179	0.044145	0.212015	0.051207	0.048611	0.100015	0.219358	0.166665			133	No Stimuli	0.201964
134	No Stimuli	0.441349	0.222043	0.18011	0.127924	0.341622	0.256519	0.332571	0.082133	0.147444	0.203044	0.18901	0.134892	0.438943	0.038698	0.146926	0.059962	0.071241	0.077025	0.08299	0.212068	0.21054	0.211492	0.518699	0.055412	0.102411	0.045164	0.167201	0.02251	0.268695	0.434028	0.24135	0.049492	0.13647	0.180935	0.127377	0.285494	0.053493	0.184488	0.054093	0.029949	0.0994448	0.177201	0.125259			134	No Stimuli	0.155973
135	No Stimuli	0.335	0.198928	0.181967	0.120683	0.31082	0.267991	0.439522	0.064465	0.14188	0.174678	0.155047	0.124899	0.556868	0.04612	0.133949	0.059113	0.069844	0.093286	0.068681	0.177692	0.152812	0.191464	0.429082	0.050374	0.091487	0.066558	0.13141	0.020259	0.257413	0.352329	0.168007	0.040059	0.13647	0.192998	0.118928	0.243056	0.084135	0.145833	0.043995	0.023929	0.0843428	0.164546	0.121799			135	No Stimuli	0.114977
136	No Stimuli	0.373388	0.194723	0.140189	0.161715	0.30522	0.26737	0.356013	0.072105	0.136316	0.170198	0.149141	0.132396	0.53066	0.042409	0.082044	0.057697	0.063558	0.094997	0.073451	0.171882	0.183374	0.194669	0.401924	0.044917	0.089439	0.043976	0.107372	0.01632	0.21434	0.27165	0.15095	0.030884	0.117543	0.180935	0.10853	0.219907	0.041548	0.152861	0.045438	0.02107	0.0718054	0.153291	0.114545			136	No Stimuli	0.099982
137	No Stimuli	0.343783	0.168107	0.113265	0.132752	0.302419	0.21668	0.284224	0.06733	0.14188	0.153776	0.098935	0.119906	0.759962	0.036578	0.078696	0.057037	0.056573	0.065899	0.06105	0.147189	0.129042	0.177044	0.361189	0.052053	0.081246	0.029713	0.083867	0.016883	0.188701	0.233864	0.146686	0.029463	0.127505	0.156809	0.079286	0.212192	0.043106	0.131777	0.050486	0.023478	0.0715123	0.142243	0.131199			137	No Stimuli	0.083986
138	No Stimuli	0.367796	0.159703	0.096554	0.07965	0.263217	0.189518	0.271039	0.075925	0.127971	0.162734	0.093029	0.144885	0.635481	0.040818	0.131019	0.055527	0.055875	0.08216	0.059142	0.123949	0.149416	0.175442	0.378841	0.054572	0.091487	0.042787	0.074252	0.02251	0.183573	0.220588	0.137305	0.025199	0.142446	0.156809	0.099432	0.204475	0.047261	0.142905	0.056977	0.021822	0.0649668	0.139245	0.115947			138	No Stimuli	0.087982
139	No Stimuli	0.354178	0.188421	0.081699	0.115856	0.170811	0.187708	0.238807	0.071627	0.150227	0.106001	0.081216	0.114906	0.832019	0.045589	0.093346	0.055291	0.053081	0.055629	0.062004	0.123465	0.112061	0.165829	0.354399	0.046176	0.066226	0.035062	0.051816	0.01632	0.17742	0.18893	0.133894	0.025457	0.135474	0.132685	0.074736	0.169753	0.045703	0.129434	0.171653	0.020769	0.0584131	0.134002	0.13608			139	No Stimuli	0.083986
140	No Stimuli	0.312615	0.164605	0.083556	0.077237	0.240816	0.164169	0.228552	0.057302	0.116843	0.107494	0.056112	0.127396	0.393085	0.033397	0.100462	0.05298	0.054478	0.044503	0.058188	0.102161	0.105271	0.169033	0.357115	0.059609	0.086025	0.049919	0.053953	0.018008	0.159986	0.167484	0.128777	0.024165	0.112563	0.162841	0.065638	0.19676	0.069593	0.113621	0.148368	0.025735	0.0606926	0.119783	0.0870137			140	No Stimuli	0.065986
141	KCl, 30 mM	0.293424	0.168807	0.099339	0.086892	0.198812	0.164773	0.159693	0.056347	0.111279	0.09555	0.112225	0.134892	0.661689	0.040818	0.114275	0.049677	0.071241	0.05734	0.415903	0.44302	0.091687	0.258757	0.344894	0.086896	0.08466	0.04873	0.100962	0.425446	0.74455	0.16442	0.121954	0.023131	0.12352	0.271402	0.462066	0.227624	0.140744	0.178631	0.142433	0.020618	0.0621174	0.186859	0.166632			141	KCl, 30 mM	0.076986
142	KCl, 30 mM	0.244655	0.215738	0.10544	0.155164	0.144009	0.194003	0.241737	0.069581	1.59765	0.12477	2.13586	4.76619	9.66981	0.776082	2.61201	0.97359	0.787236	1.52949	1.90781	1.67974	2.14785	1.18621	2.92423	1.10194	1.05337	0.51956	1.31639	1.52427	2.2042	1.66973	0.716374	0.442718	0.232667	1.15023	2.03738	1.65124	0.416222	2.44603	0.134458	0.059662	0.865817	1.3593	1.66142			142	KCl, 30 mM	0.083557
143	KCl, 30 mM	0.650822	0.278778	0.087535	0.103443	0.246016	0.179777	0.251156	0.691716	1.234	0.159961	1.98081	3.9943	34.0016	1.08461	2.95107	0.841542	0.621109	1.57717	1.31353	1.0427	2.95436	1.27032	2.78748	0.952612	1.10165	0.350194	1.13668	0.857403	1.74051	2.20369	3.09576	1.05989	0.228398	1.04684	1.33411	1.77469	0.420673	1.87626	0.134458	0.30347	1.02762	1.97436	5.21311			143	KCl, 30 mM	0.098552
144	KCl, 30 mM	1.37062	0.597378	0.085545	0.103443	0.144009	0.225043	0.194646	1.4479	0.822669	3.22802	0.949271	1.20653	13.8365	0.785624	1.81334	0.44469	0.428041	0.95914	0.664873	0.961778	2.32613	0.844595	1.46357	0.599093	0.732971	0.189741	0.654762	0.537837	1.64601	1.93015	1.54057	0.555142	0.198514	0.930521	1.11826	1.31173	0.18474	1.06551	0.086548	0.246388	0.69302	1.19817	2.13132			144	KCl, 30 mM	0.107122
145	KCl, 30 mM	1.1102	0.541844	0.282499	0.806852	0.510032	0.902756	0.781721	0.889203	0.637867	3.23761	0.772074	0.711928	7.90094	0.543893	1.2834	0.37902	0.333752	0.806925	0.428304	0.846614	2.23275	0.741595	1.08822	0.538824	0.551557	0.12989	0.453297	0.337655	1.46361	1.34147	1.29203	0.301606	0.175034	0.568653	0.860628	1.03395	0.127982	0.717872	0.081912	0.228973	0.471375	0.937715	1.25676			145	KCl, 30 mM	0.827014
146	KCl, 30 mM	1.01941	0.400749	1.05241	0.920639	0.840054	0.977775	0.894741	0.634414	0.441142	1.83315	0.686639	0.539568	5.50314	0.397582	0.796162	0.351279	0.332256	0.49149	0.520833	0.828976	2.25822	0.729579	0.91655	0.520833	0.443294	0.106968	0.413233	0.274948	1.3779	1.21893	1.17325	0.25276	0.147285	0.439412	0.841132	0.725308	0.120192	0.706576	0.07882	0.245098	0.399326	0.801269	0.876563			146	KCl, 30 mM	1.13977
147	KCl, 30 mM	0.926875	0.391758	0.899223	0.636172	0.750048	0.761783	0.580797	0.552554	0.429218	1.16772	0.64234	0.624504	5.58176	0.349873	0.688166	0.388219	0.308309	0.469483	0.4884	0.736637	2.26671	0.652329	0.907821	0.501943	0.479869	0.106968	0.388049	0.205005	1.18231	1.15984	0.838816	0.197711	0.1729	0.491109	0.646168	0.787038	0.113515	0.582329	0.083457	0.222523	0.363301	0.724965	0.869208			147	KCl, 30 mM	0.869819
148	KCl, 30 mM	0.892599	0.310692	0.533168	0.444803	0.510032	0.698411	0.489753	0.470694	0.429218	0.902181	0.541084	0.592029	5.85691	0.318066	0.678119	0.267776	0.228987	0.403462	0.446429	0.621473	1.56208	0.667779	0.840898	0.423683	0.459387	0.087867	0.343407	0.176063	0.813115	1.00665	0.957602	0.186598	0.140881	0.465261	0.579323	0.679013	0.085693	0.662651	0.071093	0.25187	0.377955	0.645726	0.884944			148	KCl, 30 mM	0.737014
149	KCl, 30 mM	0.791513	0.28068	0.38595	0.424114	0.528033	0.543208	0.433243	0.44102	0.393451	0.841396	0.436665	0.619504	5.97484	0.318066	0.678119	0.236923	0.234974	0.405296	0.397779	0.631848	1.17156	0.60083	0.794344	0.395797	0.345272	0.08914	0.364011	0.168828	0.883439	1.08325	0.749269	0.155714	0.147285	0.555727	0.575145	0.879629	0.090144	0.59488	0.072639	0.226716	0.345594	0.616728	0.897884			149	KCl, 30 mM	0.659864
150	KCl, 30 mM	0.846349	0.28368	0.252658	0.362049	0.492031	0.507003	0.458359	0.418508	0.447102	0.8222	0.506278	0.719424	6.07966	1.63804	0.681468	0.258388	0.234974	0.359448	0.321467	0.649485	1.08666	0.588813	0.779795	0.441674	0.342346	0.08914	0.40522	0.15918	0.725211	0.958508	0.573831	0.135426	0.147285	0.439412	0.523618	0.810185	0.091257	0.588604	0.066456	0.242196	0.337656	0.631001	0.924693			150	KCl, 30 mM	0.608462
151	KCl, 30 mM	0.791513	0.271674	0.266584	0.372393	0.348022	0.500521	0.386151	0.3653	0.381527	0.732622	0.452486	0.671964	6.05346	1.743	0.753466	0.210881	0.197557	0.342943	0.343407	0.679573	1.11213	0.509847	0.712873	0.403893	0.324789	0.091687	0.357143	0.174857	0.683457	0.93006	0.787646	0.130128	0.181438	0.542804	0.547293	0.887346	0.15024	0.558484	0.085002	0.204463	0.293083	0.622773	0.926358			151	KCl, 30 mM	0.66629
152	KCl, 30 mM	0.80352	0.29268	0.200933	0.398254	0.390025	0.393171	0.33906	0.281393	0.333836	0.550266	0.51577	0.577036	4.04219	1.07188	0.553797	0.247962	0.191571	0.256749	0.293803	0.59346	0.984787	0.460064	0.747789	0.432678	0.298455	0.073859	0.305632	0.139886	0.525229	0.908176	0.776681	0.116818	0.177169	0.426489	0.453989	0.493828	0.109063	0.532128	0.075729	0.202206	0.325445	0.509597	0.615597			152	KCl, 30 mM	0.807692
153	KCl, 30 mM	0.661316	0.322709	0.179049	0.46032	0.46203	0.363422	0.33592	0.225115	0.268261	0.643044	0.405022	0.631993	4.5663	1.18003	0.472172	0.14823	0.194564	0.304431	0.276633	0.552996	0.814995	0.504697	0.616853	0.373309	0.267732	0.084046	0.298764	0.13868	0.514241	0.936625	0.63231	0.11152	0.183573	0.452337	0.40107	0.439815	0.141337	0.411647	0.077275	0.129644	0.285146	0.499248	0.692671			153	KCl, 30 mM	0.734887
154	KCl, 30 mM	0.678454	0.310692	0.188996	0.413771	0.390025	0.451378	0.33592	0.253766	0.30403	0.563063	0.357559	0.624504	4.10115	1.24046	0.431568	0.146532	0.149665	0.352113	0.258509	0.450282	0.747081	0.460064	0.611034	0.346323	0.266269	0.082773	0.302198	0.13265	0.509845	0.842524	0.550073	0.094721	0.162227	0.452337	0.359291	0.470679	0.086806	0.970131	0.089639	0.117389	0.284535	0.486366	0.629911			154	KCl, 30 mM	0.674887
155	KCl, 30 mM	0.676743	0.282182	0.163133	0.325844	0.372024	0.359548	0.348478	0.208743	0.34576	0.511875	0.335409	0.577036	3.99633	1.11641	0.619098	0.134218	0.160141	0.249413	0.262325	0.46377	0.619736	0.413714	0.567388	0.330131	0.235546	0.062398	0.241529		0.476881	0.733106	0.561038	0.098985	0.143016	0.439412	0.360684	0.462963	0.18474	0.523343	0.088093	0.089977	0.29003	0.46078	0.61157			155	KCl, 30 mM	0.70914
156	KCl, 30 mM	0.639046	0.309193	0.147218	0.367221	0.348022	0.368612	0.244876	0.212836	0.321914	0.556665	0.325916	0.557058	4.58595	1.22456	0.796162	0.12016	0.176604	0.242077	0.204136	0.495933	0.432966	0.453197	0.625582	0.318437	0.226767	0.075133	0.193452	0.120591	0.472486	0.706845	0.621345	0.085804	0.162227	0.361868	0.327261	0.370371	0.063435	0.375251	0.072639	0.144479	0.21737	0.455406	0.700652			156	KCl, 30 mM	0.764842
157	KCl, 30 mM	0.575658	0.291182	0.14125	0.3155	0.252016	0.332381	0.389291	0.202603	0.292107	0.463887	0.262632	0.646986	4.04219	1.13231	0.329432	0.185783	0.161638	0.203565	0.206044	0.446132	0.500883	0.403414	0.558659	0.304944	0.251638	0.070039	0.206044	0.082002	0.463695	0.597426	0.524488	0.084383	0.175034	0.348945	0.302195	0.385803	0.152466	0.341366	0.066456	0.128999	0.272934	0.416937	0.613488			157	KCl, 30 mM	0.781991
158	KCl, 30 mM	0.678454	0.3317	0.131303	0.299983	0.246016	0.258679	0.27941	0.162696	0.268261	0.435094	0.300603	0.444647	2.9088	0.938295	0.556309	0.106761	0.185584	0.176056	0.18792	0.393219	0.424477	0.46178	0.570298	0.255469	0.223841	0.057304	0.195742	0.094061	0.406558	0.617122	0.550073	0.074691	0.185707	0.40064	0.306372	0.455247	0.087918	0.308735	0.085002	0.123839	0.255227	0.376339	0.447085			158	KCl, 30 mM	0.771267
159	KCl, 30 mM	0.613355	0.310692	0.127324	0.413771	0.288018	0.297467	0.304526	0.166789	0.280185	0.473485	0.496785	0.454633	2.63365	0.973282	0.581843	0.104355	0.146672	0.216402	0.196505	0.046688	0.339582		0.832169	0.250072	0.222378	0.058578	0.172848	0.089238	0.45051	0.529587	0.539108	0.068747	0.166496	0.297251	0.306372	0.339506	0.090144	0.29493	0.089639	0.137706	0.232024	0.365833	0.421778			159	KCl, 30 mM	0.790588
160	KCl, 30 mM																																														160	KCl, 30 mM
Graph 3I
Insulin secretion/ beta-cells in 100 islets		ND without Autoantibodies																																									n=41						ND with Autoantibodies
Time (min)	Stimulus	HPAP004	HPAP005	HPAP006	HPAP011	HPAP012	HPAP014	HPAP018	HPAP022	HPAP034	HPAP035	HPAP036	HPAP042	HPAP056	HPAP059	HPAP063	HPAP066	HPAP067	HPAP069	HPAP074	HPAP075	HPAP082	HPAP095	HPAP099	HPAP101	HPAP103	HPAP104	HPAP105	HPAP110	HPAP117	HPAP118	HPAP119	HPAP121	HPAP122	HPAP125	HPAP127	HPAP128	HPAP129	HPAP131	HPAP132	HPAP139	HPAP140	Average	STDEV			Time (min)	Stimulus	HPAP003
20	No Stimuli	1.47877	1.31235	2.23593	0.71086	0.713435	5.77612	2.62198	1.45526	0.641148	4.59807	1.50782	0.60226	1.05989	0.85676	1.00232	1.02878	2.16	7.42395	3.7804	2.22379	0.42203	6.65345	7.89464	1.53844	3.15578	0.452144	1.24645	0.645735	4.22101	1.59988	4.08329	1.2513	0.518444	2.09016	2.96437	2.99733	0.875341	7.76523	0.632206	3.54487	9.66015	2.61956	2.38593			20	No Stimuli	1.04459
21	No Stimuli	1.70501	1.40411	2.37903	1.10306	0.786782	5.79935	2.30393	1.7349	0.712388	4.42456	1.44897	0.497509	1.16004	0.860467	1.10971	1.08633	2.11962	7.50466	2.82809	2.21399	0.414493	6.70975	7.35637	1.44202	3.30194	0.602858	1.18769	0.580344	4.01116	1.52317	3.96603	1.10842	0.59045	2.69308	3.03445	2.86157	0.791974	7.62291	0.514338	3.59969	9.18261	2.59214	2.29415			21	No Stimuli	1.12158
22	No Stimuli	1.396	1.19302	1.84241	0.808908	0.580083	5.54932	2.19533	2.02024	0.854867	4.03416	1.47104	0.523716	1.23793	0.752908	1.40451	1.1199	1.85719	7.74674	2.80885	1.62131	0.693334	6.04347	7.91575	1.42945	2.90679	0.423883	1.14992	0.523127	4.89253	1.44098	3.53149	0.984441	0.398434	1.56762	2.40373	2.61092	0.68082	6.09299	0.450043	3.67278	9.80938	2.45464	2.30904			22	No Stimuli	0.93464
23	No Stimuli	1.56707	1.14716	1.91396	1.39721	0.693434	5.75308	2.19533	1.82621	0.76582	3.46157	1.22832	0.5368	0.895762	0.82338	1.0318	1.15188	2.01869	7.82744	2.72708	1.71927	0.414493	6.16546	8.05296	1.23662	2.97716	0.414462	1.0408	0.527214	4.6587	1.22182	3.62806	0.800581	0.624053	2.09016	2.45279	2.80935	0.548825	5.39919	0.407183	3.94687	8.97369	2.41638	2.2475			23	No Stimuli	0.85768
24	No Stimuli	1.82089	1.30314	2.03917	0.71086	0.740108	6.28074	1.88503	1.83191	0.961726	3.95608	1.02237	0.60226	1.00704	0.704691	1.09076	0.983212	2.12971	7.20204	2.26536	1.94459	0.587824	6.19362	8.00019	1.42106	2.91761	0.405045	0.973655	0.461823	4.71266	1.26565	3.60047	1.0002	0.604852	2.06718	2.74011	2.92423	0.65998	6.58221	0.600059	3.15201	8.77472	2.44212	2.25345			24	No Stimuli	0.918143
25	No Stimuli	1.51188	1.26645	1.73508	0.931472	0.626757	5.6373	1.93158	1.75202	0.837054	3.68713	0.809071	0.628467	1.19064	0.801125	1.0339	1.15907	2.02878	6.83892	2.26536	1.75356	0.678261	6.08101	7.56746	1.2492	2.85807	0.4804	1.01143	0.396432	4.25099	1.15607	3.73152	0.717582	0.523245	1.9845	2.28459	2.88246	0.673874	5.63935	1.69303	3.14288	7.67042	2.31947	2.03924			25	No Stimuli	0.835684
26	No Stimuli	1.41809	1.26645	2.07494	0.882448	0.573417	4.90607	1.62904	1.60364	0.623342	3.1666	0.750231	0.392796	0.918019	0.626805	0.791748	1.17106	2.13981	4.72067	2.42407	1.73397	0.76116	6.81298	7.94741	1.24081	2.7065	0.386206	0.902308	0.367824	3.51351	1.13964	3.77291	0.727037	0.499243	1.81912	2.43877	2.46471	0.736398	5.48814	0.621489	2.92361	8.02857	2.17345	2.01816			26	No Stimuli	0.956635
27	No Stimuli	1.46775	1.24808	2.03917	0.588296	0.653427	4.30433	1.5825	1.43814	0.605529	2.73282	0.787005	0.445172	0.931927	0.5823	0.827546	1.00879	2.13981	5.68901	2.00082	1.56743	0.241157	5.89332	7.74688	1.22404	2.63614	0.405045	0.868735	0.343303	3.8013	1.05745	3.28319	0.565239	0.441637	1.56762	2.2005	2.37072	0.736398	5.77278	0.503621	2.65866	5.1932	2.00368	1.83258			27	No Stimuli	0.852181
28	No Stimuli	1.68295	1.23892	1.73508	0.490248	0.460066	4.90607	1.5825	1.5751	0.694581	2.90633	1.12535	0.274961	0.879069	0.663897	0.909668	1.33573	1.65532	5.34606	2.02487	1.32742	0.512461	6.13731	7.32471	1.15278	2.4954	0.348528	0.826766	0.314694	4.14906	1.03554	3.2418	0.48119	0.484841	1.52742	2.17948	2.41249	0.882289	5.09676	0.503621	2.77743	7.38191	2.05075	1.91806			28	No Stimuli	0.764198
29	No Stimuli	1.47877	1.25729	1.68142	0.490248	0.526743	4.31367	1.56698	1.5694	0.658961	2.8803	0.639901	0.484425	0.845688	0.586007	0.810699	0.976817	1.79663	5.99162	2.04892	1.31762	0.278841	6.25931	7.11362	1.08571	2.52246	0.273169	0.793193	0.298347	3.79531	0.893083	3.36596	0.521112	0.331228	1.60781	2.94334	2.37072	0.889235	5.37251	0.375035	3.51746	7.4416	2.04808	1.97032			29	No Stimuli	0.698236
30	Amino acid Mixure, 4 mM	1.55603	1.07373	1.19846	0.490248	0.526743	4.63758	1.76092	1.76914	0.854867	3.2707	0.632548	0.654635	0.984781	0.649061	1.00232	1.21583	1.89756	6.19336	1.53428	1.39599	0.625508	5.42411	7.31415	1.10667	2.24099	0.405045	0.759619	0.662082	3.41758	0.909518	3.13834	0.476987	0.302426	1.64801	2.2916	2.27672	0.569668	4.99892	0.503621	3.01497	6.79493	2.0044	1.85961			30	Amino acid Mixure, 4 mM	0.709234
31	Amino acid Mixure, 4 mM	1.51188	0.926908	1.82452	0.490248	0.473401	4.28586	1.46614	1.58652	0.748007	3.31408	0.713455	0.576091	0.776142	0.578588	0.861237	0.821744	1.77645	5.4671	1.59681	1.31762	0.964639	5.45226	6.92364	1.07733	2.28429	0.376784	0.843555	0.269738	3.29766	0.920476	3.37285	0.397139	0.278423	1.56762	2.30562	2.81979	0.632192	4.71428	0.642919	2.70433	6.54622	1.93914	1.77506			31	Amino acid Mixure, 4 mM	0.571787
32	Amino acid Mixure, 4 mM	1.64431	1.07373	1.91396	0.490248	0.413392	3.29547	1.17136	1.85474	0.80144	3.53965	1.61079	0.484425	1.26853	0.853048	0.87387	1.70743	1.82691	8.51334	4.65576	3.95286	0.459709	6.32499	8.5279	2.13788	3.28028	0.565177	1.31779	1.05443	4.38289	2.06011	6.63535	0.656645	0.571248	2.81367	4.10667	2.80935	2.23003	7.20485	0.482191	3.8281	10.5456	2.77903	2.53686			32	Amino acid Mixure, 4 mM	1.20954
33	Amino acid Mixure, 4 mM	2.27888	2.73478	1.52043	1.20111	0.420061	3.11019	1.71437	3.34424	1.13982	7.06195	2.45664	0.47134	2.36737	2.11408	2.80481	2.79616	2.08934	18.3178	9.47986	8.95883	1.27362	7.24465	8.44347	3.45834	4.63895	0.838345	3.24831	2.28868	6.04971	5.4352	8.9184	2.10126	1.1281	3.81855	6.63654	5.05474	3.33463	9.91779	0.621489	7.1537	19.8973	4.58253	4.30261			33	Amino acid Mixure, 4 mM	2.93582
34	Amino acid Mixure, 4 mM	2.38371	1.22055	1.59198	1.07854	0.486738	4.07754	1.37305	5.96941	1.08639	5.88207	1.80202	0.60226	2.08362	2.09183	2.68268	1.85691	1.46355	9.03786	6.99807	4.81005	0.859128	5.02058	5.99486	2.13369	3.05294	0.659375	1.90534	1.23425	5.62401	4.13119	5.50416	0.478037	0.888076	3.21561	5.39613	4.16702	1.75068	5.49703	0.739357	7.19938	15.0523	3.39224	2.90923			34	Amino acid Mixure, 4 mM	1.53942
35	Amino acid Mixure, 4 mM	2.17402	1.17469	2.8441	1.3727	0.513408	5.05879	2.34272	5.66695	0.908293	3.2707	0.809071	0.510631	1.37146	1.63192	1.85724	1.45404		5.99162	4.2758	2.39033	0.708408	4.41061	4.73889	1.31207	2.10025	0.518081	0.893915	0.66617	5.65399	2.26284	2.89693	1.4131	0.734463	2.00977	4.37998	3.33153	1.07681	4.11833	0.696497	6.04821	10.844	2.66083	2.1718			35	Amino acid Mixure, 4 mM	0.769697
36	Amino acid Mixure, 4 mM	1.87055	1.14716	7.94203	2.5493	1.07349	4.09144	3.05639	5.04489	0.837054	1.8132	0.581061	0.615344	0.79005	1.27957	1.1434	1.1247	1.40299	4.84171	2.72708	1.68988	0.791302	4.54199	4.86555	1.13182	1.85125	0.273169	0.591746	0.420953	5.38418	1.4629	2.64862	0.958175	0.518444	2.17054	4.0506	2.44382	0.687768	3.54016	0.653637	6.13957	6.82478	2.37981	1.96519			36	Amino acid Mixure, 4 mM	0.538793
37	Amino acid Mixure, 4 mM	1.9147	1.27561	6.63625	2.10807	1.12016	3.54074	2.82367	4.47421	0.783627	1.3534	0.470734	0.628467	0.545246	0.956901	0.703307	1.03517	1.26168	3.36903	2.02487	1.22945	0.452172	4.12908	4.40116	0.884497	1.58601	0.376784	0.558173	0.355562	4.59874	0.947872	2.11752	0.647189	0.312026	1.88918	2.1094	2.42293	0.847553	3.51348	0.653637	5.60053	5.5613	2.00537	1.67553			37	Amino acid Mixure, 4 mM	0.522296
38	Amino acid Mixure, 4 mM	1.69397	1.33988	6.29639	1.44624	1.03348	3.33698	1.97037	3.34424	0.569909	1.40545	0.558994	0.641551	0.43119	0.686147	0.47589	1.02718	1.40299	3.02607	1.66896	1.04332	0.361741	4.25107	4.59114	0.855153	1.4561	0.329685	0.537188	0.30652	4.77861	1.00814	1.8899	0.524265	0.24482	1.96956	1.92018	2.12007	0.77808	3.07763	0.589346	6.82479	5.32253	1.88136	1.70504			38	Amino acid Mixure, 4 mM	0.384849
39	Amino acid Mixure, 4 mM	1.57809	1.16549	6.18906	1.71587	0.886795	3.08715	1.65231	2.80209	0.658961	1.65704	0.544284	0.563007	0.456227	0.623099	0.524324	1.06555	1.27177	3.18746	1.44771	0.950254	0.76116	4.50445	4.28506	0.729396	1.54271	0.28259	0.465844	0.269738	4.31694	0.745149	1.86921	0.533721	0.292825	0.964681	1.65388	1.92164	0.736398	3.32669	0.557199	4.06564	4.55648	1.71727	1.48156			39	Amino acid Mixure, 4 mM	0.373851
40	Amino acid Mixure, 4 mM	1.396	1.0921	5.24103	1.39721	0.706769	3.05935	2.10224	3.27576	0.819247	2.18625	0.595771	0.458256	0.534118	0.656479	0.549591	1.08233	1.03962	3.51024	1.4429	0.793511	0.798839	4.51383	4.41171	0.721013	1.51023	0.301429	0.478433	0.261564	4.8026	0.712273	3.14524	0.511657	0.23522	1.36664	1.4997	1.90075	0.805868	2.29488	0.675067	2.85051	4.38736	1.71033	1.42196			40	Amino acid Mixure, 4 mM	0.324386
41	Amino acid Mixure, 4 mM	1.49533	1.32151	4.7044	1.22562	0.613422	2.92967	1.70662	3.08172	0.890486	1.83055	0.367761	0.746302	0.522993	0.611969	0.566438	1.05675	1.06991	4.09528	1.53428	0.989439	0.452172	4.6546	4.09508	0.653942	1.38573	0.367367	0.495222	0.232955	5.16234	0.706795	2.01405	0.471734	0.144013	1.40683	1.69593	2.23494	0.722504	3.35337	1.35013	2.78656	4.68582	1.71787	1.43348			41	Amino acid Mixure, 4 mM	0.401345
42	Amino acid Mixure, 4 mM	1.34634	1.24808	4.45398	1.05404	0.500073	3.05478	1.92382	3.08743	0.76582	2.16023	0.382471	0.589176	0.470136	0.634224	0.522216	1.20144	1.11028	4.47858	1.22647	0.999235	0.489856	4.054	4.22173	0.746164	1.36408	0.376784	0.516204	0.196173	4.45484	0.646526	2.32444	0.51481	0.096008	1.44703	1.52774	1.76498	0.68082	3.05095	0.621489	2.97842	4.89474	1.66284	1.40961			42	Amino acid Mixure, 4 mM	0.351855
43	Amino acid Mixure, 4 mM	1.28013	1.21139	3.7206	1.27465	0.400057	3.04087	1.82298	2.8934	0.712388	2.1342	0.279497	0.60226	0.489608	0.675022	0.488525	1.00719	1.09009	4.47858	1.33228	1.04822	0.474782	3.91324	3.89455	0.700053	1.29371	0.320268	0.453253	0.192085	4.07711	0.630088	2.02785	0.419201	0.100809	1.40683	1.62585	1.8172	0.701662	3.31779	0.632206	2.28407	5.33248	1.59993	1.36296			43	Amino acid Mixure, 4 mM	0.37935
44	Amino acid Mixure, 4 mM	1.30222	1.25729	3.48805	1.12758	0.480069	2.9807	1.42735	2.2314	0.605529	1.61366	0.330984	0.43205	0.511865	0.649061	0.267424	0.896881	1.11028	4.43823	1.46214	1.0923	0.361741	3.80063	4.04231	0.71682	1.23417	0.367367	0.499417	0.224782	3.86126	0.701315	2.14511	0.46648	0.211217	1.65375	1.59081	1.93208	0.673874	3.41563	0.760788	2.21098	4.89474	1.54806	1.30265			44	Amino acid Mixure, 4 mM	0.368352
45	Amino acid Mixure, 4 mM	1.26911	1.11042	3.47017	1.20111	0.42673	2.45304	1.37305	2.0659	0.76582	1.83055	0.272144	0.549885	0.517429	0.697278	0.524324	1.33333	1.2314	4.31719	1.28418	0.999235	0.911886	3.73494	3.50404	0.679093	1.24499	0.329685	0.453253	0.232955	3.8133	0.608173	1.91749	0.609366	0.211217	1.7284	1.31049	1.99474	0.590507	2.86415	1.1144	3.8555	4.94448	1.5694	1.26346			45	Amino acid Mixure, 4 mM	0.335383
46	Amino acid Mixure, 4 mM	1.34083	1.33988	3.07665	1.44624	0.366721	2.40676	4.36739	2.0716	0.961726	1.62234	0.353051	0.523716	0.534118	0.630517	0.45273	0.888888	0.948782	5.5478	1.50062	0.896374	0.731013	3.8757	2.81801	0.599445	1.24499	0.25433	0.449055	0.192085	3.83128	0.460239	1.77954	0.461227	0.22082	1.76858	1.25442	1.73365	0.68082	2.6062	0.889373	4.03823	3.86008	1.586	1.34786			46	Amino acid Mixure, 4 mM	0.307889
47	Amino acid Mixure, 4 mM	1.09253	1.4408	2.61157	0.759884	0.440065	2.24014	1.39632	2.0659	0.730201	1.66572	0.397181	0.628467	0.589756	0.660186	0.39798	1.05515	0.90841	5.11838	1.26494	0.813103	0.595361	3.83816	3.29295	0.603638	1.21793	0.244909	0.390302	0.175738	3.48953	0.531466	2.152	0.503252	0.096008	1.32644	1.24742	1.71276	0.507143	2.67736	0.996529	2.84138	3.86008	1.42871	1.18977			47	Amino acid Mixure, 4 mM	0.285893
48	Amino acid Mixure, 4 mM	1.09804	1.22975	2.23593	0.882448	0.340048	2.71677	1.55923	2.44826	1.38916	1.53558	0.264787	0.615344	0.720504	0.667604	0.372712	0.852917	1.16075	5.64867	0.985983	0.930662	0.452172	3.50033	3.57792	0.620405	1.20169	0.310847	0.423875	0.17165	4.25698	0.542424	1.55883	0.484341	0.182415	1.88918	1.4086	1.94252	0.715556	2.47277	0.632206	2.54902	3.64121	1.46805	1.24832			48	Amino acid Mixure, 4 mM	0.307889
49	Amino acid Mixure, 4 mM	1.1753	1.21139	2.07494	0.955989	0.326713	2.36963	1.37305	2.14008	0.961726	1.53558	0.220657	0.589176	0.567503	0.63793	0.351653	2.82014	0.968969	5.64867	1.06775	0.822899	0.429567	3.36895	3.12408	0.649749	1.17462	0.301429	0.402891	0.17165	3.65741	0.487632	1.614	0.471734	0.139212	1.6882	1.10025	1.66055	0.750292	2.49946	0.578629	4.54986	3.44224	1.46542	1.28171			49	Amino acid Mixure, 4 mM	0.263898
50	Amino acid Mixure, 4 mM	1.13115	1.25729	2.27171	0.980496	0.353383	1.95774	1.13257	1.56369	0.46305	1.22326	0.360404	0.576091	0.386681	0.545208	0.271636	0.909672	1.05981	4.41806	1.08218	0.837595	0.482319	3.53787	3.1663	0.603638	1.15297	0.376784	0.335742	0.17165	3.2377	0.542424	1.48985	0.418151	0.470439	1.7284	1.54175	1.66055	0.791974	2.71294	0.503621	4.79654	2.87516	1.35069	1.15851			50	Amino acid Mixure, 4 mM	0.258399
51	Amino acid Mixure, 4 mM	1.08149	1.26645	2.28959	1.02952	0.273373	1.82357	1.17911	1.51803	0.730201	1.47485	0.264787	0.589176	0.450663	0.586007	0.408508	0.819345	0.90841	5.16449	0.961934	0.764122	0.972175	3.46279	2.87078	0.628789	1.17462	0.367367	0.356726	0.179824	2.93192	0.487632	1.53123	0.504302	0.240021	1.80879	1.48569	1.85897	0.618295	2.73962	0.557199	2.66779	2.9249	1.31593	1.07508			51	Amino acid Mixure, 4 mM	0.263898
52	Amino acid Mixure, 4 mM	1.00976	1.22055	2.11072	0.882448	0.286708	1.95774	1.11706	1.46667	0.730201	1.4228	0.419247	0.680842	0.517429	0.645349	0.419036	0.863309	0.817569	4.31719	0.976363	0.734731	0.859128	3.41587	3.07131	0.591061	1.07719	0.348528	0.310562	0.155303	3.14777	0.487632	1.30362	0.506404	0.201617	1.36664	1.26844	2.1514	0.757241	2.37493	0.546481	3.34387	2.93486	1.28819	1.03403			52	Amino acid Mixure, 4 mM	0.247406
53	Amino acid Mixure, 4 mM	0.960104	1.19302	2.11072	1.02952	0.28004	1.9069	1.20239	1.38107	0.676768	1.0324	0.294207	0.680842	0.664866	0.641642	0.50116	0.926457	1.08	4.29702	0.918647	0.724935	0.39942	3.00297	2.87078	0.607831	1.06636	0.320268	0.285382	0.143042	2.91993	0.438321	1.3588	0.506404	0.096008	1.52742	1.19836	1.75454	0.882289	2.40162	0.535768	5.41781	2.64634	1.28981	1.13747			53	Amino acid Mixure, 4 mM	0.225413
54	Amino acid Mixure, 4 mM	0.899399	1.18385	2.03917	0.784401	0.260039	2.02268	1.62128	1.60364	0.76582	1.30134	0.250077	0.693926	0.492392	0.560045	0.425355	1.0064	0.827664	5.20484	0.822454	0.710242	0.324057	2.84343	2.9341	0.620405	1.0393	0.376784	0.323153	0.175738	3.2377	0.525986	1.44847	0.457024	0.182415	1.48723	1.81506	1.97385	0.701662	2.50836	0.696497	4.71432	2.84532	1.33429	1.17806			54	Amino acid Mixure, 4 mM	0.230912
55	Amino acid Mixure, 4 mM	0.915952	1.0921	2.12861	0.980496	0.260039	1.84671	1.64456	1.54086	0.837054	1.47485	0.191234	0.589176	0.453443	0.626805	0.357973	0.938449	0.928596	4.68032	0.87536	0.710242	0.33913	2.94666	2.65969	0.582678	1.01223	0.301429	0.276988	0.155303	2.89595	0.482155	1.21395	0.434961	0.134412	1.84899	1.47868	1.74409	0.583562	2.24151	0.621489	3.74587	2.32799	1.24635	1.0353			55	Amino acid Mixure, 4 mM	0.236411
56	Amino acid Mixure, 4 mM	0.871827	1.26645	1.69931	1.07854	0.206696	1.61991	0.946397	1.35824	0.694581	1.0324	0.294207	0.43205	0.333823	0.5823	0.25058	1.17906	0.830546	3.57076	0.832073	0.671055	0.354204	2.90912	2.71247	0.536567	0.963516	0.22607	0.264398	0.143042	2.70408	0.427363	1.31052	0.517961	0.12001	1.36664	0.995131	1.483	0.722504	2.12588	0.653637	4.43109	2.67619	1.15596	0.993294			56	Amino acid Mixure, 4 mM	0.247406
57	Amino acid Mixure, 4 mM	0.877336	1.22055	2.18227	0.955989	0.300043	1.56901	0.72919	0.998706	0.712388	0.989018	0.264787	0.523716	0.331043	0.545208	0.364289	0.857715	0.857941	3.85319	0.779167	0.636767	0.241157	2.91851	2.78635	0.503032	1.04471	0.292008	0.2602	0.106259	3.14777	0.38901	1.20016	0.462278	0.196817	1.92938	1.05119	1.33679	0.486301	2.12588	0.492908	5.66448	2.11906	1.17811	1.14677			57	Amino acid Mixure, 4 mM	0.208921
58	Amino acid Mixure, 4 mM	0.921488	1.20222	1.93185	0.833425	0.313378	1.70787	1.15585	1.26693	0.569909	1.04975	0.529574	0.549885	0.347736	0.634224	0.494841	0.846522	0.635887	4.01459	0.865741	0.5486	0.489856	2.89974	2.43805	0.515607	1.00682	0.301429	0.297971	0.143042	2.78802	0.39997	1.03462	0.402391	0.364831	1.56762	0.890012	1.22191	0.423777	2.06361	0.953664	3.27992	2.28819	1.12662	0.910464			58	Amino acid Mixure, 4 mM	0.236411
59	Amino acid Mixure, 4 mM	0.816631	1.18385	2.05706	0.882448	0.326713	1.59678	1.0007	1.28405	0.76582	1.11915	0.250077	0.458256	0.389461	0.60455	0.471681	0.846524	0.726728	4.2365	0.87536	0.504516	0.195941	2.8622	2.29029	0.486263	1.05012	0.25433	0.256004	0.130782	2.77004	0.334221	0.993233	0.487492	0.225619	1.88918	0.812922	1.28457	0.472407	2.00135	0.610776	1.82725	2.21855	1.06952	0.884812			59	Amino acid Mixure, 4 mM	0.335383
60	Amino acid Mixure, 4 mM	0.744908	1.21139	1.62776	0.71086	0.293375	1.67546	1.51268	1.29546	0.854867	1.11915	0.242721	0.693926	0.395025	0.57117	0.360077	0.77218	0.777196	3.89354	0.630067	0.445738	0.384346	2.69328	2.59637	0.54495	0.860668	0.310847	0.281184	0.118521	2.99188	0.356137	0.993233	0.489594	0.240021	1.48723	0.946075	1.26368	0.472407	2.19703	0.557199	2.04652	2.09917	1.06727	0.863397			60	Amino acid Mixure, 4 mM	0.170434
61	Amino acid Mixure, 4 mM + Glucose, 3 mM	0.827676	1.19302	1.78875	0.71086	0.25337	1.7634	1.08603	1.26122	0.748007	0.884914	0.205947	0.66772	0.364424	0.574882	0.288483	0.736212	0.696446	3.95407	0.673354	0.514312	0.301452	2.5056	2.43805	0.498839	0.774059	0.357946	0.276988	0.155303	2.74006	0.350659	1.00013	0.528468	0.240021	2.21075	0.861978	1.22191	0.500195	2.14367	0.66435	4.96099	2.01958	1.12059	1.04269			61	Amino acid Mixure, 4 mM + Glucose, 3 mM	0.263898
62	Amino acid Mixure, 4 mM + Glucose, 3 mM	0.744908	1.33067	1.71719	0.71086	0.213365	1.36073	0.985184	1.10143	0.819247	1.08445	0.345694	0.43205	0.31435	0.478448	0.259004	0.788968	0.746914	3.4699	0.764737	0.480024	0.550145	2.3836	2.36417	0.578487	0.839016	0.395623	0.230824	0.147129	2.3983	0.367094	0.807002	0.493797	0.657656	1.7284	0.883003	1.06525	0.555771	2.20593	0.503621	4.33059	1.82061	1.05986	0.906175			62	Amino acid Mixure, 4 mM + Glucose, 3 mM	0.181432
63	Amino acid Mixure, 4 mM + Glucose, 3 mM	0.656632	1.0462	1.69931	0.906965	0.25337	1.43016	1.14809	0.964465	0.76582	1.34472	0.632548	0.392796	0.678775	0.786288	0.505372	1.09992	1.3828	4.45841	0.928266	0.994338	0.278841	2.97481	3.17685	0.691669	1.29912	0.357946	0.289578	0.155303	2.60815	0.432843	1.81403	0.538974	5.01643	2.37152	1.24742	1.73365	0.666926	5.07898	0.739357	5.20767	3.37259	1.51531	1.38932			63	Amino acid Mixure, 4 mM + Glucose, 3 mM	0.175933
64	Amino acid Mixure, 4 mM + Glucose, 3 mM	0.755953	1.11042	1.66354	0.833425	0.286708	1.37926	1.13257	1.21557	1.01515	3.39216	0.919398	0.5368	1.46883	1.43906	0.686463	1.18945	1.3929	6.13284	1.38037	1.74376	0.610435	4.51383	4.35894	1.08152	1.65638	0.452144	0.528795	0.200259	3.63343	0.767064	3.39354	0.791126	3.70111	3.57737	2.22152	2.86157	0.868393	6.09299	0.985811	5.65535	5.66079	2.03139	1.71552			64	Amino acid Mixure, 4 mM + Glucose, 3 mM	0.203422
65	Amino acid Mixure, 4 mM + Glucose, 3 mM	0.822167	1.0921	1.66354	0.784401	0.326713	1.7634	1.0007	1.06148	0.943913	3.47024	0.823782	0.5368	1.35199	1.61709	0.71805	1.27098	1.61495	6.53631	1.85172	1.76826	0.512461	4.41061	3.85233	1.13601	2.01905	0.386206	0.734437	0.232955	4.03514	0.986225	3.13834	1.03487	1.80495	2.85386	1.94121	3.6344	2.59824	5.76388	1.10215	5.39953	6.45668	2.07444	1.70128			65	Amino acid Mixure, 4 mM + Glucose, 3 mM	0.181432
66	Amino acid Mixure, 4 mM + Glucose, 3 mM	0.976657	1.16549	1.75297	0.955989	0.28004	2.4159	1.4196	1.1585	0.926106	2.92368	0.573704	0.628467	1.02373	1.33891	1.02969	1.21023	1.40299	6.89944	1.47176	1.27353	0.542609	4.26046	3.36683	1.06056	1.6239	0.470982	0.478433	0.216606	3.47753	1.05197	2.39342	1.03067	1.56493	3.05484	1.82908	3.26887	0.72945	4.58976	0.857226	5.66448	4.72561	1.88014	1.5499			66	Amino acid Mixure, 4 mM + Glucose, 3 mM	0.258399
67	Amino acid Mixure, 4 mM + Glucose, 3 mM	0.904934	1.19302	1.77086	0.882448	0.346717	2.70287	1.2722	1.02724	0.943913	2.2036	0.558994	0.628467	0.731632	0.964319	1.00653	1.17906	1.24149	6.15589	1.36595	1.01883	0.595361	3.81001	3.06076	1.245	1.86749	0.518081	0.457451	0.216606	3.0998	0.997183	2.03475	1.06429	1.28171	2.81137	1.89916	2.47515	0.743344	4.01159	0.889373	5.81067	3.40244	1.71684	1.37662			67	Amino acid Mixure, 4 mM + Glucose, 3 mM	0.395846
68	Amino acid Mixure, 4 mM + Glucose, 3 mM	1.01527	1.34904	1.87818	0.906965	0.333382	2.21691	1.14033	0.884568	0.819247	1.30134	0.661968	0.418965	0.470136	0.697278	1.03812	1.1295	1.26168	6.65735	1.45252	1.05801	0.512461	4.01647	3.01854	1.44202	1.86749	0.4804	0.47004	0.273824	2.88995	1.03554	1.67608	1.21873	1.06569	2.646	1.64687	2.07829	0.805868	4.39153	0.910804	5.28076	3.02439	1.64494	1.38597			68	Amino acid Mixure, 4 mM + Glucose, 3 mM	0.30239
69	Amino acid Mixure, 4 mM + Glucose, 3 mM	1.04287	1.27561	1.84241	1.10306	0.406726	2.15674	1.24118	0.787552	0.997345	1.52691	0.617838	0.5368	0.564719	0.600844	0.996002	1.19904	1.37271	5.0838	1.76996	0.984542	0.437104	3.85693	2.88134	1.28273	2.00436	0.4804	0.440662	0.326954	2.824	1.07937	1.71057	1.11577	1.08489	2.93426	1.56278	1.69188	0.771135	4.1628	0.889373	6.77911	3.21342	1.64967	1.36589			69	Amino acid Mixure, 4 mM + Glucose, 3 mM	0.225413
70	Amino acid Mixure, 4 mM + Glucose, 3 mM	1.02632	1.33067	1.30579	1.05404	0.380056	2.01335	1.81522	1.03865	1.1042	1.67439	0.853202	0.563007	0.484044	0.61568	1.0697	1.29256	1.11028	5.26536	2.02487	0.837595	0.595361	3.92262	2.87078	1.26596	1.82418	0.518081	0.465844	0.367824	3.0998	1.15607	2.06924	1.31644	0.878475	2.85386	1.18435	1.74409	0.805868	4.22507	0.717927	5.85635	4.457	1.68425	1.35272			70	Amino acid Mixure, 4 mM + Glucose, 3 mM	0.291392
71	Amino acid Mixure, 4 mM + Glucose, 3 mM	1.03183	1.37657	1.78875	0.906965	0.420061	2.51778	1.35753	1.16421	0.943913	1.88261	0.801718	0.523716	0.456227	0.611969	1.09287	1.18785	1.16075	6.21353	2.1403	1.05312	1.08522	3.80063	2.76524	1.09829	1.62932	0.4804	0.486826	0.437301	2.94991	1.05197	2.08303	1.21348	0.94568	2.41171	1.44364	1.77542	0.951759	4.46523	0.792935	6.30402	3.0045	1.70265	1.393			71	Amino acid Mixure, 4 mM + Glucose, 3 mM	0.269397
72	Amino acid Mixure, 4 mM + Glucose, 3 mM	1.05942	1.41327	1.50255	1.39721	0.393391	2.38829	1.40408	1.0729	1.12201	2.39447	0.956175	0.654635	0.522993	0.693566	0.937043	1.10871	1.33233	5.76971	1.79882	1.04332	0.640582	3.37834	3.06076	1.02702	1.48316	0.518081	0.512008	0.388259	2.75205	0.997183	2.00026	1.12628	0.844872	2.41171	1.28246	2.24539	0.722504	4.37628	0.750075	4.57727	3.23332	1.64129	1.22754			72	Amino acid Mixure, 4 mM + Glucose, 3 mM	0.346356
73	Amino acid Mixure, 4 mM + Glucose, 3 mM	1.04838	1.38574	1.43099	0.906965	0.480069	2.69373	1.70662	0.964465	0.961726	2.00406	0.919398	0.746302	0.509081	0.712109	0.406403	1.33653	1.01944	5.64867	1.97197	1.02373	0.753624	3.31265	2.70191	0.918033	1.39656	0.4804	0.440662	0.384171	2.48824	1.00266	1.76575	1.13468	0.892875	1.6882	1.4086	2.19317	0.798923	4.65202	0.66435	5.29903	2.97465	1.59092	1.2678			73	Amino acid Mixure, 4 mM + Glucose, 3 mM	0.37935
74	Amino acid Mixure, 4 mM + Glucose, 3 mM	1.15875	1.45001	1.44888	1.07854	0.446731	2.29099	1.29548	0.764723	0.926106	1.83055	0.875268	0.497509	0.453443	0.619387	0.770692	1.01359	1.05981	4.66015	1.88539	0.984542	0.42203	3.5191	2.90244	0.905457	1.23417	0.489821	0.449055	0.388259	2.47624	0.964309	1.82093	1.04117	0.888076	2.04995	1.28946	1.99474	0.70861	4.67871	0.66435	5.91116	3.16368	1.5481	1.27235			74	Amino acid Mixure, 4 mM + Glucose, 3 mM	0.2529
75	Amino acid Mixure, 4 mM + Glucose, 3 mM	0.987702	1.39494	1.62776	0.686353	0.446731	2.05962	1.25669	0.821793	1.01515	2.49858	1.04444	0.47134	0.542466	0.678729	0.817015	1.05595	1.01944	4.59963	1.65934	0.857187	0.527535	3.50033	2.77579	0.834195	1.25582	0.527499	0.432269	0.30652	2.54819	0.953352	1.60021	0.965529	0.897677	1.84899	1.36655	1.67099	0.639138	4.66981	0.675067	5.02495	3.03434	1.50233	1.19358			75	Amino acid Mixure, 4 mM + Glucose, 3 mM	0.307889
76	Amino acid Mixure, 4 mM + Glucose, 3 mM	1.02081	1.43164	1.55621	0.759884	0.473401	1.75877	1.22566	0.810379	0.997345	1.86525	0.992952	0.523716	0.662086	0.730658	0.675935	1.14628	0.888223	5.14432	1.61605	0.783714	0.467246	3.63171	2.39583	0.741971	1.32619	0.348528	0.402891	0.298347	2.47025	0.860207	1.46226	0.922454	0.748864	2.09016	1.28246	1.37857	0.70861	4.25175	0.782222	2.76829	2.9249	1.39822	1.07137			76	Amino acid Mixure, 4 mM + Glucose, 3 mM	0.401345
77	Amino acid Mixure, 4 mM + Glucose, 3 mM	1.03183	1.4867	1.27001	0.735377	0.453399	2.06895	1.48165	0.861741	1.01515	2.8456	0.963532	0.73318	0.400589	0.667604	0.650664	1.13109	0.868037	5.40658	1.41404	0.715139	0.452172	3.52848	2.40639	0.880306	1.12591	0.386206	0.436466	0.294259	2.44027	0.816376	1.73816	0.836303	0.60005	1.88918	1.12127	1.96341	0.917023	4.42965	0.685784	5.79239	2.76573	1.50504	1.30203			77	Amino acid Mixure, 4 mM + Glucose, 3 mM	0.406844
78	Amino acid Mixure, 4 mM + Glucose, 3 mM	0.926997	1.5693	1.19846	0.514765	0.453399	2.20301	1.26445	0.878863	0.997345	2.14288	0.838492	0.77247	0.464572	0.734364	0.673828	1.06635	1.02953	4.74949	1.30823	0.813103	0.625508	3.19065	2.65969	0.863537	0.925625	0.414462	0.44486	0.294259	2.06853	0.78898	1.68987	0.857315	0.69606	2.09016	1.24041	1.82764	1.02123	4.60755	1.03939	5.62794	2.73588	1.47096	1.21864			78	Amino acid Mixure, 4 mM + Glucose, 3 mM	0.384849
79	Amino acid Mixure, 4 mM + Glucose, 3 mM	0.965613	1.57846	1.44888	0.833425	0.366721	1.99488	1.61353	0.850328	0.997345	2.28169	1.10328	0.60226	0.403369	0.623099	0.404296	1.06075	0.989155	5.56797	1.35152	0.808206	0.497393	3.13435	2.36417	0.821618	1.07178	0.386206	0.373513	0.26565	2.27838	0.78898	1.51744	0.909847	0.633653	1.96956	1.3175	1.74409	1.33385	4.55418	0.921521	3.40783	2.77568	1.43688	1.13603			79	Amino acid Mixure, 4 mM + Glucose, 3 mM	0.340857
80	Amino acid Mixure, 4 mM + Glucose, 3 mM	0.910443	1.78955	1.23423	0.759884	0.373387	1.76803	1.20239	0.781844	0.961726	1.52691	0.963532	0.445172	0.386681	0.600844	0.541168	0.94964	1.11028	3.51024	1.16394	0.79841	0.535072	3.37834	2.44861	0.809042	0.941864	0.4804	0.407088	0.277912	2.21243	0.756107	1.86921	0.926657	0.624053	1.84899	1.08623	1.35768	0.68082	3.76253	0.964381	4.83309	2.71599	1.33402	1.03407			80	Amino acid Mixure, 4 mM + Glucose, 3 mM	0.324386
81	Amino acid Mixure, 4 mM + Glucose, 16.7 mM	0.888381	1.63352	1.62776	1.00501	0.406726	1.90226	1.34202	0.73619	0.908293	1.44883	0.926755	0.497509	0.403369	0.693566	0.440094	1.0032	0.938691	4.12698	1.2457	0.832695	0.550145	3.09681	2.49082	0.775507	0.985167	0.53692	0.415482	0.281998	2.36233	0.832811	1.44847	0.91405	0.614452	2.33132	1.03718	1.26368	0.646086	4.18949	0.803652	5.86549	2.60655	1.39161	1.17891			81	Amino acid Mixure, 4 mM + Glucose, 16.7 mM	0.296891
82	Amino acid Mixure, 4 mM + Glucose, 16.7 mM	1.03458	1.7207	1.68653	1.5758	0.32862	2.04305	1.82852	1.02724	1.60287	2.00778	1.48155	0.510631	0.447883	0.663897	0.389556	1.10552	1.01655	5.01463	1.47382	0.85019	0.734784	4.04194	2.64612	0.745565	1.17153	0.444067	0.458649	0.332793	2.41543	0.92752	1.87709	0.777467	0.617195	1.89491	1.11126	1.16969	0.714564	13.5139	1.33176	5.79501	3.66679	1.80971	2.23365			82	Amino acid Mixure, 4 mM + Glucose, 16.7 mM	0.38878
83	Amino acid Mixure, 4 mM + Glucose, 16.7 mM	0.951814	2.27133	1.34156	1.05054	0.485784	2.28108	1.24672	1.50417	1.71736	4.62906	1.74949	1.99011	1.65243	1.39826	1.6214	1.51719	2.03311	6.00891	7.96688	3.85209	0.791302	10.2154	8.18715	2.51516	7.20317	1.8772	1.63675	1.26987	4.2784	3.34612	6.54765	1.75876	0.51433	4.73729	1.69693	2.19317	1.07185	14.2763	2.64057	4.97274	13.1536	3.46715	3.31098			83	Amino acid Mixure, 4 mM + Glucose, 16.7 mM	0.447676
84	Amino acid Mixure, 4 mM + Glucose, 16.7 mM	1.50362	1.7207	2.1465	1.26064	0.32862	2.25138	0.980751	4.32909	4.65597	17.8842	4.05061	7.2534	1.41041	4.62872	4.21143	2.3717	4.62856	21.4851	16.3666	16.1221	2.88261	15.7254	20.3096	8.01257	13.7568	8.80063	6.95168	6.62082	8.27414	15.8148	20.1159	7.14009	0.740635	9.56073	10.2266	10.3601	6.08868	32.8602	2.77833	6.81305	42.6371	9.17221	8.96279			84	Amino acid Mixure, 4 mM + Glucose, 16.7 mM	0.435906
85	Amino acid Mixure, 4 mM + Glucose, 16.7 mM	2.63476	2.31723	1.57154	1.26064	0.485784	2.34069	1.87839	6.13899	6.06803	22.4017	6.09956	9.08639	9.18017	5.18506	4.21143	4.94964	5.36394	29.9581	20.0769	18.7042	3.14638	12.9704	19.6084	10.4469	9.65062	7.2262	7.14953	7.73305	9.90583	21.4856	22.7025	8.40505	1.3064	9.38846	15.0171	11.0285	9.73594	28.8766	2.43391	16.8368	34.3655	10.4715	8.61452			85	Amino acid Mixure, 4 mM + Glucose, 16.7 mM	0.377011
86	Amino acid Mixure, 4 mM + Glucose, 16.7 mM	4.70385	4.79489	1.68653	6.35573	2.85756	3.06468	1.66229	6.22459	5.11393	15.9507	6.90338	6.54639	5.892	4.00562	4.21143	6.26618	4.45553	29.0503	19.6028	15.3139	2.29855	11.3013	15.628	7.81495	7.01758	3.87551	5.17104	6.62958	8.81375	14.4764	18.9039	5.75326	1.80015	6.71835	14.972	8.54292	7.22008	21.2143	2.27318	11.0157	35.5167	9.06389	7.46179			86	Amino acid Mixure, 4 mM + Glucose, 16.7 mM	1.0014
87	Amino acid Mixure, 4 mM + Glucose, 16.7 mM	4.7592	5.00148	1.87818	15.1277	8.91557	6.75413	4.25546	6.89719	3.96902	12.623	6.13108	5.61679	3.9892	2.44788	4.21143	6.73381	2.89826	20.6205	14.3466	9.49904	1.80869	9.51163	13.208	5.38064	5.20809	2.62404	3.99294	4.25624	8.01717	10.6019	15.1793	6.37523	1.87216	5.85703	10.0314	8.52204	5.06149	22.6438	1.79099	9.60613	24.4737	7.87069	5.58271			87	Amino acid Mixure, 4 mM + Glucose, 16.7 mM	3.3929
88	Amino acid Mixure, 4 mM + Glucose, 16.7 mM	4.53831	4.54292	3.06642	9.55986	7.45822	9.42197	6.34994	8.97613	3.24391	11.4518	6.5724	5.30258	3.52185	2.38112	3.85135	5.9952	2.74686	18.2602	12.0791	8.91125	2.31739	10.2557	10.4488	6.06333	5.18489	2.56348	3.73214	3.75706	5.76877	9.05214	11.5582	5.77427	1.91331	4.90956	8.61979	5.2845	3.75146	19.0795	1.58434	39.1554	18.5258	7.74466	6.67715			88	Amino acid Mixure, 4 mM + Glucose, 16.7 mM	5.56061
89	Amino acid Mixure, 4 mM + Glucose, 16.7 mM	3.89021	4.12972	6.17118	6.61836	5.30077	9.47167	6.89849	9.59981	3.39657	10.8569	6.63544	5.45971	3.4217	2.13633	3.65552	5.54676	2.05474	14.8479	9.67774	7.70419	2.12898	10.9193	10.1548	5.49742	5.19649	2.60386	3.74114	3.21408	6.03858	9.59221	13.1544	4.70683	1.38869	5.51249	6.84778	4.99208	3.23042	19.1367	1.67618	39.0576	21.148	7.49785	6.71426			89	Amino acid Mixure, 4 mM + Glucose, 16.7 mM	4.93632
90	Amino acid Mixure, 4 mM + Glucose, 16.7 mM	3.09008	4.17563	10.9625	4.41224	4.20061	9.56079	7.03148	11.0673	3.66371	10.6152	5.12237	6.00959	3.75553	2.62591	3.76291	5.05995	2.31428	20.4476	8.05963	7.84064	1.9971	10.9394	10.9011	5.48843	5.69526	3.49199	4.12784	3.03892	6.30839	10.2849	12.0902	5.22794	1.04923	5.42636	6.26211	4.72054	3.30486	24.6833	2.22726	31.5005	16.3513	7.53402	6.24288			90	Amino acid Mixure, 4 mM + Glucose, 16.7 mM	4.65367
91	Amino acid Mixure, 4 mM + Glucose, 16.7 mM	3.15894	4.15267	15.3321	4.56982	3.08616	9.17404	6.41643	11.4219	3.74004	11.8422	5.18542	6.19289	4.33972	2.31436	4.18616	4.72902	2.14125	16.6866	8.02871	8.55438	1.54493	11.603	10.9916	4.87761	5.73006	3.37088	4.06489	3.0652	6.07712	10.872	12.6962	4.87493	1.06981	6.28768	6.26211	5.61869	4.19806	21.6146	2.02061	17.0718	15.9889	7.19886	4.91735			91	Amino acid Mixure, 4 mM + Glucose, 16.7 mM	3.51084
92	Amino acid Mixure, 4 mM + Glucose, 16.7 mM	2.97963	4.31328	15.9837	5.72541	2.77183	6.58542	4.92037	8.47474	3.24391	9.16516	5.61097	5.57754	3.02111	1.98056	3.12277	5.78177	2.20614	14.0928	8.36883	10.0658	1.54493	11.4622	12.5069	6.17112	5.99684	3.7544	4.10086	3.10023	5.37048	10.6606	14.7064	5.06404	1.19325	6.02928	5.91672	5.01296	3.43884	18.298	1.83692	18.9121	18.0142	7.00203	4.89929			92	Amino acid Mixure, 4 mM + Glucose, 16.7 mM	3.29885
93	Amino acid Mixure, 4 mM + Glucose, 16.7 mM	2.99341	4.72617	16.942	6.19815	3.41478	5.6632	5.43568	9.26963	3.74004	11.7864	5.45335	6.33693	3.77222	2.06957	3.83871	5.1271	2.66034	15.724	8.56465	10.4227	2.54348	11.9851	12.9366	6.15315	5.90405	3.65347	4.40663	3.01265	6.2313	10.9541	14.9428	5.6524	1.09038	5.59863	5.79659	4.90853	3.23042	21.2715	2.43391	27.4284	18.6324	7.63184	5.81203			93	Amino acid Mixure, 4 mM + Glucose, 16.7 mM	3.77011
94	Amino acid Mixure, 4 mM + Glucose, 16.7 mM	3.44869	4.35914	17.0953	6.14562	3.55766	7.41852	5.40244	10.1379	4.35066	13.0692		6.8999	4.33972	2.40337	3.71658	5.31415	2.2494	17.4215	9.07997	9.46755	3.2971	12.6688	11.6927	6.10824	6.06644	3.81495	4.21777	2.92507	4.97219	10.872	12.5337	6.08946	1.44012	5.85703	7.59863	5.07563	3.17088	20.7759	3.00795	25.686	18.6751	7.81057	5.64861			94	Amino acid Mixure, 4 mM + Glucose, 16.7 mM	3.55787
95	Amino acid Mixure, 4 mM + Glucose, 16.7 mM	3.25561	4.42795	15.9454	5.67288	4.04344	7.79537	5.31932	8.78046	3.96902	13.9987	5.42183	7.2534	3.67207	2.44788	3.38599	5.23501	2.48731	14.9574	9.16242	9.61449	1.78985	13.1715	11.9641	6.09027	6.03164	3.6131	4.27173	3.04768	5.79446	10.4845	12.7997	6.63579	1.12124	6.71835	7.1331	5.57692	3.34952	21.8433	3.03091	32.9101	18.7817	7.87818	6.24465			95	Amino acid Mixure, 4 mM + Glucose, 16.7 mM	3.7935
96	Amino acid Mixure, 4 mM + Glucose, 16.7 mM	2.86919	5.7358	16.0987	5.5153	3.54337	8.8665	5.18634	9.75879	4.80862	13.9429	4.42888	8.10445	3.55523	2.95971	3.76502	4.77938	2.57383	17.2918	7.55462	11.5773	2.6	12.1861	10.7428	6.30586	5.71846	3.55255	4.09187	3.07395	7.43901	11.4942	16.7756	5.67761	1.1521	5.16796	7.29829	4.99208	3.4835	22.1482	2.25022	20.7132	19.208	7.78018	5.51187			96	Amino acid Mixure, 4 mM + Glucose, 16.7 mM	4.30009
97	Amino acid Mixure, 4 mM + Glucose, 16.7 mM	2.86919	5.16227	15.9071	6.19815	3.87199	8.8865	5.26945	8.53588	4.08351	15.6161	5.13813	8.85072	3.73883	2.67042	2.85114	4.75539	2.61708	17.2054	8.25546	10.6116	1.52609	12.347	12.7104	6.59331	6.10123	3.73421	4.17281	3.11774	5.82016	12.4452	13.3318	5.80369	1.49155	5.68476	7.17815	5.32627	4.7191	23.6159	1.99765	34.0848	23.1306	8.24456	6.83428			97	Amino acid Mixure, 4 mM + Glucose, 16.7 mM	4.60639
98	Amino acid Mixure, 4 mM + Glucose, 16.7 mM	3.15894	5.59792	16.0987	6.14562	3.82912	7.43833	6.15046	7.45972	4.50331	12.1768	5.3115	7.51528	3.63869	2.04732	3.51865	4.90407	2.63871	16.8595	8.52342	12.207	1.3	13.2921	12.4164	6.54839	5.64886	3.77458	5.16205	2.95135	6.01288	12.2221	14.4846	5.58516	1.23439	5.42636	7.71877	5.1174	4.85904	21.8623	1.95172	28.329	21.0201	7.96685	6.06085			98	Amino acid Mixure, 4 mM + Glucose, 16.7 mM	3.87611
99	Amino acid Mixure, 4 mM + Glucose, 16.7 mM	3.09008	5.5063	15.2938	6.98605	4.35777	7.22029	5.56867	6.92165	4.46515	11.4518	5.09085	7.30578	4.84045	2.67042	4.21143	5	2.59546	16.9028	9.38916	12.0496	1.41304	13.3324	13.1401	6.00045	6.22883	4.25902	4.8293	3.30166	6.35978	12.2221	14.6768	5.62718	1.32697	5.34023	6.59249	5.53515	4.45114	23.7874	1.92876	21.046	21.9368	7.90861	5.63931			99	Amino acid Mixure, 4 mM + Glucose, 16.7 mM	4.71239
100	Amino acid Mixure, 4 mM + Glucose, 16.7 mM	2.82787	5.5063	14.9105	7.14363	4.27205	8.67817	6.74889	7.86328	4.99944	15.3744	5.48488	8.5365	4.05597	2.5814	4.21143	5.01439	2.57383	17.3783	8.9666	11.3883	1.37536	14.3378	11.6701	7.28497	6.6232	4.19846	5.03614	3.27538	6.5268	12.2104	17.6328	7.34181	1.21382	5.08183	7.88396	5.4516	4.06408	23.3872	1.72211	26.9585	23.1733	8.4138	6.24376			100	Amino acid Mixure, 4 mM + Glucose, 16.7 mM	3.85247
101	Amino acid Mixure, 4 mM + Glucose, 16.7 mM + IBMX, 0.1 mM	3.3936	5.66708	15.4854	6.98605	4.31491	8.58887	6.78214	6.70152	4.80862	15.4674	5.26422	8.47104	3.53854	2.11408	7.06256	5.27817	2.48731	17.9835	9.1212	12.1756	1.18696	14.4585	13.7282	6.53043	6.46081	4.54161	5.53976	3.34544	6.2313	11.9051	14.4107	6.28488	1.3064	6.89062	8.12423	5.70225	4.57321	25.0454	2.31911	29.2883	22.2566	8.58101	6.40725			101	Amino acid Mixure, 4 mM + Glucose, 16.7 mM + IBMX, 0.1 mM	3.80544
102	Amino acid Mixure, 4 mM + Glucose, 16.7 mM + IBMX, 0.1 mM	3.26939	5.9424	14.2205	7.30121	4.05773	9.37246	8.95973	7.31298	4.99944	14.668	4.30279	10.6445	3.93913	2.38112	6.1908	4.73381	2.46568	19.7559	9.68805	12.7004	1.60145	15.1221	14.1805	6.35976	6.04324	4.72327	5.28795	3.23159	6.78376	13.2319	15.8149	6.67571	1.1521	5.94316	9.49078	5.47249	4.45114	26.7609	2.02061	27.6437	20.0394	8.75454	6.42445			102	Amino acid Mixure, 4 mM + Glucose, 16.7 mM + IBMX, 0.1 mM	4.53573
103	Amino acid Mixure, 4 mM + Glucose, 16.7 mM + IBMX, 0.1 mM	3.24184	6.12565	13.4923	6.881	4.17203	8.42034	9.2257	8.23016	6.86946	20.0035	6.39902	14.7032	5.5081	3.2045	7.78272	6.05275	4.30413	23.8195	15.0062	16.1011	2.12898	17.696	16.2838	9.0905	8.13111	7.85194	5.92646	4.2037	10.0729	18.4095	22.3625	7.99951	1.73843	6.02928	14.7468	6.80927	9.79548	32.5362	2.77833	26.3125	24.1966	10.8449	7.42099			103	Amino acid Mixure, 4 mM + Glucose, 16.7 mM + IBMX, 0.1 mM	4.97166
104	Amino acid Mixure, 4 mM + Glucose, 16.7 mM + IBMX, 0.1 mM	5.00737	7.22691	13.7989	7.45879	3.68625	8.33103	5.90112	9.75879	9.00662	20.5612	8.21155	16.7326	5.45803	3.8276	6.92358	7.23741	5.90466	31.6008	19.2421	23.163	3.22174	24.8348	19.4275	9.36896	13.954	13.7056	8.64238	6.27927	12.9251	18.4565	20.6776	11.5801	2.85967	8.61326	16.1433	10.3601	17.6408	34.5757	5.62556	26.2863	35.4741	13.1632	8.60967			104	Amino acid Mixure, 4 mM + Glucose, 16.7 mM + IBMX, 0.1 mM	4.81863
105	Amino acid Mixure, 4 mM + Glucose, 16.7 mM + IBMX, 0.1 mM	6.88361	7.61719	11.5374	8.87701	5.87228	8.77738	6.84863	10.6637	9.73173	26.5102	9.33059	23.2397	6.6598	4.69548	9.88	10.187	7.18076	56.5875	17.2942	23.4904	4.80435	30.2039	21.0559	11.3541	15.5895	16.915	9.91041	5.85015	13.5418	26.0645	24.4318	10.811	4.57753	8.44101	14.5966	10.6943	15.9288	37.4538	8.15132	28.2963	36.604	15.2961	10.9801			105	Amino acid Mixure, 4 mM + Glucose, 16.7 mM + IBMX, 0.1 mM	5.83158
106	Amino acid Mixure, 4 mM + Glucose, 16.7 mM + IBMX, 0.1 mM	7.47663	9.65893	10.6941	10.3478	8.60124	9.10453	7.9956	9.57535	9.50275	28.6853	10.7333	26.5129	7.57782	6.89858	12.5711	11.0599	6.35887	49.3682	18.0466	20.4046	5.78406	36.1562	25.3078	9.87199	17.0742	17.1168	8.68735	5.62245	17.1007	31.3087	24.2199	14.3726	4.13521	9.9914	15.1973	11.6551	15.0505	34.1945	5.69444	29.1055	37.2364	16.0014	10.6106			106	Amino acid Mixure, 4 mM + Glucose, 16.7 mM + IBMX, 0.1 mM	7.9759
107	Amino acid Mixure, 4 mM + Glucose, 16.7 mM + IBMX, 0.1 mM	8.33185	11.6778	17.1336	8.4568	12.7447	12.3478	16.4733	8.85384	9.61724	29.4847	10.3393	27.4949	6.91017	7.81097	11.9394	10.0096	6.48864	45.6504	18.6856	18.8196	5.57681	36.7997	22.4355	8.69526	19.8696	18.7518	9.02009	5.25462	14.5054	29.9625	28.925	16.4319	4.10435	9.56073	17.1044	11.1538	12.7877	37.0535	5.14337	28.2963	39.8231	16.5982	10.5533			107	Amino acid Mixure, 4 mM + Glucose, 16.7 mM + IBMX, 0.1 mM	8.29389
108	Amino acid Mixure, 4 mM + Glucose, 16.7 mM + IBMX, 0.1 mM	9.22865	11.7698	44.9614	12.3438	13.0019	18.8738	13.1155	10.2113	9.80806	30.8418	7.9909	30.1789	6.07561	8.10026	13.1523	9.9952	6.33724	43.5322	18.1496	20.9924	5.42609	33.1399	24.6293	11.0847	18.8257	18.9335	9.00211	5.07071	14.4283	31.3087	26.7523	15.1711	3.86776	11.8002	16.714	11.5716	14.1275	37.8922	5.92406	36.0752	41.6991	17.8562	11.531			108	Amino acid Mixure, 4 mM + Glucose, 16.7 mM + IBMX, 0.1 mM	9.97865
109	Amino acid Mixure, 4 mM + Glucose, 16.7 mM + IBMX, 0.1 mM	9.89079	11.9302	57.0738	18.0167	9.77284	18.8637	13.9798	9.02505	8.73948	23.7588	8.41645	21.4722	6.4762	7.12111	9.55151	9.55635	6.09932	40.3764	17.758	20.7929	6.19855	33.4616	24.9007	9.90792	23.1986	15.4011	8.25568	5.20208	15.4176	24.0138	30.7035	16.8101	4.13521	11.8002	17.1795	11.8014	14.0382	37.511	5.3041	34.0913	45.1385	17.6376	12.1123			109	Amino acid Mixure, 4 mM + Glucose, 16.7 mM + IBMX, 0.1 mM	9.53102
110	Amino acid Mixure, 4 mM + Glucose, 16.7 mM + IBMX, 0.1 mM	9.40796	13.8116	50.8259	22.3238	13.3448	13.1809	14.063	7.72877	9.42643	22.4017	8.70015	24.0253	5.7084	6.76506	8.97034	9.86091	6.6833	31.5576	16.9644	20.8454	6.04782	33.1198	23.6568	12.4321	17.7817	18.994	9.64961	5.61369	16.2656	26.2837	18.7019	14.5912	4.3718	10.4221	16.9993	11.864	13.8149	43.9153	6.47513	30.0714	45.6786	17.1548	11.2294			110	Amino acid Mixure, 4 mM + Glucose, 16.7 mM + IBMX, 0.1 mM	9.84901
111	Amino acid Mixure, 4 mM + Glucose, 16.7 mM + IBMX, 0.1 mM	10.8424	12.8253	51.1709	23.1117	13.7591	16.3347	13.7305	8.36468	9.04479	24.8742	9.15722	22.1268	6.22583	7.09886	10.1959	10.0072	6.5319	35.5347	19.4586	22.1679	5.61449	35.6736	24.9007	12.0907	18.1529	18.3683	9.19096	5.89393	17.0365	25.3131	28.9102	11.7755	4.3718	12.2308	19.2218	12.1773	13.666	48.7948	6.06182	31.3766	42.4382	17.9469	11.7522			111	Amino acid Mixure, 4 mM + Glucose, 16.7 mM + IBMX, 0.1 mM	8.90648
112	Amino acid Mixure, 4 mM + Glucose, 16.7 mM + IBMX, 0.1 mM	12.3738	13.4904	54.9273	24.3724	12.6875	19.4384	22.2248	8.46251	10.3424	29.0571	10.9698	24.6799	6.35936	6.98759	10.8528	9.90168	5.96955	34.2378	19.3452	18.5467	5.82174	35.0905	24.7876	12.7195	18.6517	18.772	9.30787	5.63996	16.8952	25.0626	22.3773	13.011	3.88833	11.8002	18.3208	11.4045	13.2046	48.0577	5.96998	33.7781	48.2084	18.4877	12.2446			112	Amino acid Mixure, 4 mM + Glucose, 16.7 mM + IBMX, 0.1 mM	9.86095
113	Amino acid Mixure, 4 mM + Glucose, 16.7 mM + IBMX, 0.1 mM	10.8702	13.605	63.0533	23.4269	14.3878	18.963	17.4208	8.75601	9.69357	25.4133	10.56	29.2624	7.14384	8.05575	10.259	10.6619	6.01281	37.5233	20.3243	20.9924	6.70724	35.8345	24.29	12.0728	19.6028	14.3111	10.2701	5.71002	13.6832	30.6982	26.8409	9.39684	3.75461	11.3695	18.6662	11.1747	12.4156	47.9307	6.9114	38.5289	36.27	18.6055	12.8145			113	Amino acid Mixure, 4 mM + Glucose, 16.7 mM + IBMX, 0.1 mM	9.29539
114	Amino acid Mixure, 4 mM + Glucose, 16.7 mM + IBMX, 0.1 mM	13.4634	13.1235	61.5584	21.1157	12.9876	19.7069	13.0822	9.39192	10.495	22.4574	10.4024	28.5423	6.96024	7.96674	11.3077	10.1319	5.73163	30.4768	18.026	20.9924	6.23623	36.8601	18.6586	14.5161	20.5076	18.2472	10.0633	5.3422	16.1243	28.2092	28.5554	14.4483	3.92948	13.9535	20.8287	13.9736	13.5916	46.4757	7.60024	38.0852	36.9806	18.5636	12.1066			114	Amino acid Mixure, 4 mM + Glucose, 16.7 mM + IBMX, 0.1 mM	11.0508
115	Amino acid Mixure, 4 mM + Glucose, 16.7 mM + IBMX, 0.1 mM	15.0637	12.9398	50.2127	23.7421	12.8161	17.3563	15.0437	8.70709	10.2279	22.4946	10.2447	22.5196	7.17723	6.85407	8.31336	10.9976	7.07262	37.2207	18.9432	20.9924	5.97246	30.7268	21.9832	10.905	17.1206	19.0546	9.74854	6.05157	15.3663	25.1566	26.6439	14.028	3.75461	13.006	19.4921	14.4958	14.7528	47.1746	7.60024	36.0752	40.5479	18.0145	11.2393			115	Amino acid Mixure, 4 mM + Glucose, 16.7 mM + IBMX, 0.1 mM	9.28369
116	Amino acid Mixure, 4 mM + Glucose, 16.7 mM + IBMX, 0.1 mM	19.6574	13.8803	55.0039	25.4754	12.2875	14.9959	13.6474	7.80214	9.00662	24.5024	11.0486	24.6145	6.35936	5.83041	10.6381	9.88489	6.66167	33.8488	19.6028	24.4351	6.21739	36.9807	26.3255	10.3481	16.2274	18.3077	10.9086	6.26176	14.7881	31.3087	28.8658	11.9856	3.91919	12.9199	20.9037	12.6577	15.2143	50.8279	5.67148	26.4887	39.6312	18.4376	12.0858			116	Amino acid Mixure, 4 mM + Glucose, 16.7 mM + IBMX, 0.1 mM	10.8622
117	Amino acid Mixure, 4 mM + Glucose, 16.7 mM + IBMX, 0.1 mM	23.5749	14.0411	53.5091	23.7946	13.902	14.9761	15.0936	7.00725	9.38826	26.0454	9.91376	26.3165	5.80855	7.16562	12.3311	10.7674	6.81307	33.4165	17.5106	20.9924	5.52029	38.6297	27.9765	12.4321	20.8324	18.8325	10.6209	5.92897	17.3705	29.6807	27.1218	14.0364	3.89862	12.5754	18.2307	9.54552	12.5942	50.8279		24.433	40.1428	18.84	11.939			117	Amino acid Mixure, 4 mM + Glucose, 16.7 mM + IBMX, 0.1 mM	10.3439
118	Amino acid Mixure, 4 mM + Glucose, 16.7 mM + IBMX, 0.1 mM	22.499	14.6146	61.4051	20.3278	12.2303	19.8364	13.797	8.09564	10.5332	30.0238	11.5844	28.6732	6.82671	7.38815	11.7372	11.0959	5.2558	36.3128	19.3143	20.9924	5.95362	40.1378	26.7779	13.2225	20.4496	17.0966	10.7917	5.78008	17.6532	28.3657	29.7379	13.8263	3.27114	11.9724	18.5911	9.81705	12.7282	42.886		33.2234	40.8677	19.3923	12.5192			118	Amino acid Mixure, 4 mM + Glucose, 16.7 mM + IBMX, 0.1 mM	10.9329
119	Amino acid Mixure, 4 mM + Glucose, 16.7 mM + IBMX, 0.1 mM	19.9884	13.7657	65.2765	21.641	13.8734	19.8364	14.9938	8.07118	10.1134	28.8898	12.1203	28.4768	7.4276	8.9904	11.3709	14.1631	5.90466	41.5869	20.448	24.8885	6.34927	38.2074	29.0621	13.2405	18.2457	19.5794	12.0058	5.99903	17.4605	28.4127	29.0284	14.0701	3.76489	14.298	17.7351	9.83794	12.49	47.2699	5.69444	33.8303	42.1042	19.7686	13.1085			119	Amino acid Mixure, 4 mM + Glucose, 16.7 mM + IBMX, 0.1 mM	10.8505
120	Amino acid Mixure, 4 mM + Glucose, 16.7 mM + IBMX, 0.1 mM	27.5901	13.9032	76.3539	22.5865	12.0446	19.8364	15.1268	9.39192	11.2583	32.7566	9.83495	26.5129	5.45803	7.72195	12.0657	12.036	6.6833	41.4139	17.0365	20.9924	6.4058	38.8106	24.765	13.51	19.8	23.2934	12.1407	6.11288	16.0472	28.0057	23.7272	15.9192	4.02206	12.6615	21.0689	10.1513	12.9217	51.3362	5.9011	26.2733	36.8385	19.7638	14.0836			120	Amino acid Mixure, 4 mM + Glucose, 16.7 mM + IBMX, 0.1 mM	11.4631
121	No Stimuli	21.3265	14.4538	67.078	24.53	11.6303	18.2588	16.6395	10.3091	10.5713	26.6403	10.8437	20.4902	7.89495	8.63435	11.9141	12.2182	6.55353	41.1113	17.3767	24.687	5.97246	35.2915	24.8102	13.1776	20.0552	21.2144	11.0525	6.15667	17.8845	30.2912	24.9491	13.3388	3.70317	14.298	19.9877	9.04422	12.5644	40.9165	6.42921	30.2867	42.6371	19.2006	12.6111			121	No Stimuli	11.687
122	No Stimuli	27.5901	16.6105	72.1376	24.6875	11.8446	16.1563	33.2458	9.01282	8.66316	22.16	10.1502	26.0546	5.05744	7.47716	10.8276	10.0863	5.94792	31.1685	15.8101	20.6775	5.40725	40.2183	25.353	10.3121	20.148	17.5811	10.5939	6.21797	17.2035	26.268	27.3336	11.0022	3.48715	13.4367	19.0867	11.4254	13.0706	44.3219	5.37298	26.8019	36.8385	18.9475	13.3181			122	No Stimuli	11.9461
123	No Stimuli	27.1213	#DIV/0!	42.2016	24.53	13.2305	16.1563	15.692	10.199	8.9303	21.342	9.80343	20.7521	5.60825	5.80815	9.37464	9.26858	6.12095	38.6905	12.1204	20.9924	4.23913	39.2329	23.0235	14.031	18.2573	18.8527	10.3601	5.97275	11.075	28.3814	21.6974	11.7166	2.97282	9.90525	16.6689	9.48286	9.70616	49.2522	5.16633	33.2038	42.0828	#DIV/0!	#DIV/0!			123	No Stimuli	14.0314
124	No Stimuli	12.8749	8.35107	35.7749	27.7236	9.53471	11.8063	15.5147	7.39613	5.94845	17.3512	7.54643	19.0369	5.55818	4.78449	3.51865	7.26059	3.95663	37.9066	8.46983	9.79643	2.65275	18.7685	17.3197	8.38386	10.826	10.1167	8.39357	4.41797	9.23945	16.8128	16.6327	11.0358	2.01137	11.5762	12.9017	8.77268	4.93248	30.4967	3.65393	17.6591	19.8973	12.3564	8.52527			124	No Stimuli	8.21925
125	No Stimuli	12.8749	8.49027	35.7749	19.9531	10.0214	11.1609	13.3659	5.02207	4.23871	15.2864	5.95035	8.74597	5.49141	4.60647	4.21143	4.50519	2.98766	22.5745	4.58843	24.8381	1.68058	14.1139	15.536	7.08017	9.75966	5.79307	7.72209	2.62789	7.13494	14.1359	13.785	8.68242	1.58413	9.44589	10.1335	8.2505	3.24432	20.8394	2.14307	12.4384	25.8097	10.4056	7.50432			125	No Stimuli	6.427
126	No Stimuli	12.8429	6.80931	35.7749	18.752	10.7882	9.25668	14.3899	4.1432	3.31261	11.7121	5.58995	5.44658	4.05597	3.249	4.21143	2.80256	2.1499	20.658	3.57359	9.39478	1.85391	10.379	11.937	4.90875	6.38735	5.23732	5.72861	1.38138	5.03043	15.2348	11.1325	6.11887	1.39212	6.67241	7.23221	5.92156	1.56311	15.735	1.44657	10.3879	19.4397	8.39108	6.7963			126	No Stimuli	6.41058
127	No Stimuli	7.76373	5.72787	32.0722	10.5404	9.06798	9.25668	11.6826	3.42984	2.54679	7.16606	4.04536	3.83618	2.25332	2.5814	3.39862	2.04796	1.85719	12.9919	2.25574	6.8673	1.49971	6.63468	10.9976	3.02238	4.2871	3.24035	4.36466	0.604865	4.53878	11.4778	8.31143	4.12688	0.969682	4.09992	4.9336	4.25058	2.05636	9.49084	1.76344	5.9203	16.3258	6.20258	5.55599			127	No Stimuli	4.76663
128	No Stimuli	6.05779	5.11778	28.459	7.42727	5.11407	9.25668	6.68683	2.37407	1.72754	4.44191	3.50107	2.19958	1.3353	1.37971	1.33502	1.52438	1.44336	7.72657	1.73148	5.82887	1.11536	4.97366	8.98174	1.93667	2.76063	2.08174	4.4444	0.380085	3.90923	8.50971	7.24922	2.02141	0.840071	3.4568	3.86139	3.34198	1.66037	8.89488	1.32258	4.7874	10.4958	4.67545	4.69652			128	No Stimuli	3.95846
129	No Stimuli	5.25952	4.86096	13.8986	5.31921	4.12059	8.17374	6.6015	1.71207	1.62069	2.85428	2.61109	1.64969	0.66765	1.06817	1.15604	1.53157	1.15065	5.78988	1.02927	5.00598	0.82145	4.01647	8.0424	1.62647	2.33842	1.56366	3.42038	0.241129	3.23171	7.62681	5.79386	1.50766	0.676857	2.04995	2.84523	2.00518	1.27828	6.53773	1.20012	2.85051	8.81451	3.52609	2.90046			129	No Stimuli	3.06794
130	No Stimuli	4.58996	4.55041	10.1243	5.00054	2.97376	6.23904	6.05849	1.61505	1.58507	2.1689	2.39779	1.53186	0.395025	0.634224	1.1813	1.32454	0.938691	4.78119	0.678163	3.18384	0.791302	3.32203	6.20595	0.989295	1.72675	1.13977	2.88739	0.167564	2.85398	4.92565	4.57301	1.12523	0.705661	2.61269	2.00428	1.47256	0.757241	5.02561	0.792935	2.5947	6.6656	2.81198	2.20818			130	No Stimuli	2.51258
131	No Stimuli	4.19082	3.99361	7.38752	2.32869	2.41368	4.91521	3.84764	1.38678	1.42478	2.29904	1.6917	1.20452	0.372772	0.508121	0.861237	1.09752	1.08	3.4699	0.577161	3.15935	0.640582	2.82466	6.22706	0.863537	1.34784	0.960804	2.12357	0.17165	2.45226	4.88729	3.66944	0.814238	0.638455	1.32644	1.8501	1.15925	0.625244	4.8566	0.825083	2.15616	5.33248	2.29178	1.77671			131	No Stimuli	1.72633
132	No Stimuli	3.80466	3.79018	5.49145	1.83844	1.8136	3.77667	3.165	1.36965	1.33573	1.59631	1.4784	1.12598	0.280969	0.382019	0.743317	1.05515	1.01944	2.64277	0.423251	2.44421	0.617971	2.70267	5.04497	0.746164	1.21251	0.828928	1.79203	0.143042	1.99059	3.80792	2.69001	0.578898	0.69606	1.56762	1.33852	1.19058	0.534931	3.97601	0.803652	2.67693	4.4769	1.92669	1.40265			132	No Stimuli	1.34148
133	No Stimuli	3.49557	3.37259	4.00679	1.69136	1.25351	2.98527	3.63044	1.21557	1.12201	1.48353	1.29452	1.00814	0.228112	0.367182	0.951783	1.09992	1.00935	3.0059	0.423251	2.38053	0.542609	2.37422	4.35894	0.712627	1.02847	0.885444	1.60317	0.163477	2.24841	2.88197	2.11752	0.475935	0.830471	1.44703	1.15631	0.898156	0.590507	3.21995	0.760788	2.95101	3.49198	1.72596	1.17199			133	No Stimuli	1.11058
134	No Stimuli	3.55358	3.39404	3.47017	1.29916	0.813452	1.96708	1.76092	0.981587	0.943913	1.17988	0.941465	0.707011	0.186386	0.270748	0.739105	1.01599	1.02953	1.81564	0.418441	2.14542	0.467246	2.47745	4.03176	0.553334	0.811951	0.715891	1.31359	0.163477	1.57089	2.32859	1.95198	0.402391	0.657656	1.20586	1.37356	0.772834	0.715556	2.80189	0.803652	1.81812	3.47208	1.44008	1.02931			134	No Stimuli	0.85768
135	No Stimuli	2.6973	3.04071	3.50594	1.22562	0.740108	2.05505	2.3272	0.770431	0.908293	1.01505	0.772295	0.654635	0.23646	0.322677	0.673828	1.0016	1.00935	2.19895	0.346296	1.79764	0.33913	2.24284	3.33517	0.503032	0.725342	1.055	1.03241	0.147129	1.50493	1.89027	1.3588	0.325696	0.657656	1.28625	1.28246	0.657951	1.12544	2.21482	0.653637	1.45267	2.9448	1.31792	0.896794			135	No Stimuli	0.63225
136	No Stimuli	3.00638	2.97644	2.70101	1.64233	0.726773	2.05029	1.88503	0.861741	0.872673	0.989018	0.742875	0.693926	0.225332	0.296715	0.412719	0.977616	0.918505	2.23929	0.370345	1.73887	0.406956	2.28038	3.12408	0.448536	0.709105	0.697052	0.843555	0.118521	1.25311	1.45742	1.22085	0.2511	0.566449	1.20586	1.17033	0.595288	0.555771	2.32156	0.675067	1.27908	2.50706	1.21988	0.848917			136	No Stimuli	0.549791
137	No Stimuli	2.76801	2.56959	2.18227	1.34819	0.720104	1.66158	1.50493	0.804671	0.908293	0.893587	0.492798	0.628467	0.322699	0.255917	0.395875	0.966425	0.817569	1.55338	0.30782	1.48906	0.286378	2.07392	2.80745	0.519799	0.644148	0.470982	0.658895	0.122608	1.10322	1.2547	1.18636	0.239543	0.614452	1.04507	0.854972	0.574403	0.576613	2.00135	0.750075	1.42526	2.49683	1.08045	0.735926			137	No Stimuli	0.461833
138	No Stimuli	2.96136	2.44114	1.8603	0.808908	0.626757	1.45329	1.43511	0.907395	0.819247	0.945643	0.463377	0.759386	0.269841	0.285585	0.659088	0.940848	0.807473	1.93668	0.298199	1.25394	0.331594	2.05516	2.94466	0.54495	0.725342	0.678213	0.583353	0.163477	1.07324	1.18347	1.11049	0.204874	0.686458	1.04507	1.07222	0.553514	0.632192	2.17035	0.846513	1.32476	2.2683	1.07638	0.722016			138	No Stimuli	0.483804
139	No Stimuli	2.85171	2.8801	1.5741	1.1766	0.406726	1.43941	1.26445	0.856033	0.961726	0.615967	0.404537	0.60226	0.353296	0.318965	0.469574	0.936849	0.767101	1.3113	0.312628	1.24905	0.248694	1.94254	2.75468	0.461112	0.525062	0.555759	0.407088	0.118521	1.03726	1.01362	1.0829	0.206975	0.652856	0.884292	0.805916	0.459521	0.61135	1.96577	2.55025	1.26081	2.03948	1.03261	0.750691			139	No Stimuli	0.461833
140	No Stimuli	2.51706	2.51607	1.60987	0.784401	0.573417	1.25891	1.21015	0.684828	0.748007	0.624644	0.279497	0.66772	0.166914	0.233661	0.505372	0.89768	0.787287	1.04904	0.29339	1.03352	0.233626	1.98008	2.77579	0.595254	0.682039	0.79125	0.423875	0.130782	0.935338	0.89856	1.04152	0.196468	0.542447	1.08527	0.707804	0.532629	0.930917	1.72561	2.2043	1.5623	2.11906	0.988692	0.691985			140	No Stimuli	0.362853
141	KCl, 30 mM	2.36254	2.5803	1.91396	0.882448	0.473401	1.26354	0.845552	0.673415	0.712388	0.555241	0.558994	0.707011	0.280969	0.285585	0.574859	0.841726	1.02953	1.35164	2.09702	4.48187	0.203478	3.03112	2.6808	0.867729	0.671213	0.772411	0.793193	3.08972	4.35291	0.882122	0.986334	0.188064	0.595251	1.80879	4.98266	0.616177	1.88268	2.71294	2.11613	1.25167	2.16881	1.49088	1.20778			141	KCl, 30 mM	0.423341
142	KCl, 30 mM	1.96987	3.29766	2.03151	1.5758	0.342907	1.48768	1.27996	0.831577	10.2279	0.725033	10.6388	24.981	4.10604	5.42985	13.1396	16.4964	11.3767	36.0535	9.61934	16.9933	4.76666	13.8954	22.7295	11.0038	8.3515	8.23545	10.3421	11.0697	12.8866	8.95821	5.79386	3.59946	1.12124	7.66582	21.97	4.46989	5.56765	37.1488	1.99765	3.62188	30.2297	9.95194	9.39083			142	KCl, 30 mM	0.45947
143	KCl, 30 mM	5.24018	4.26126	1.68653	1.05054	0.5858	1.37859	1.32983	8.26684	7.89988	0.929531	9.86647	20.9354	14.4379	7.58843	14.8453	14.259	8.97595	37.1774	6.62292	10.5487	6.55652	14.8808	21.6665	9.51269	8.73428	5.55086	8.93016	6.22673	10.1756	11.823	25.0377	8.61728	1.10067	6.97675	14.3863	4.80409	5.62719	28.4954	1.99765	18.4226	35.8791	10.568	8.94171			143	KCl, 30 mM	0.541928
144	KCl, 30 mM	11.0358	9.13121	1.6482	1.05054	0.342907	1.72571	1.03062	17.3041	5.26659	18.7579	4.72834	6.32381	5.87531	5.49661	9.12195	7.53477	6.18584	22.6091	3.35234	9.72995	5.16232	9.8937	11.3761	5.98248	5.81125	3.00755	5.14406	3.90594	9.62318	10.3554	12.4598	4.51351	0.956653	6.20155	12.0587	3.55085	2.4712	16.1823	1.28584	14.9574	24.1966	7.74019	5.8826			144	KCl, 30 mM	0.589055
145	KCl, 30 mM	8.9389	8.28236	5.4429	8.19416	1.21446	6.92266	4.1391	10.6271	4.08351	18.8137	3.84572	3.73143	3.35494	3.80534	6.45612	6.42206	4.82322	19.021	2.15954	8.56488	4.95507	8.68715	8.45855	5.38064	4.37294	2.05886	3.56127	2.45216	8.55679	7.19709	10.4496	2.45217	0.8435	3.78984	9.28054	2.7989	1.71198	10.9026	1.21696	13.9002	16.4579	6.54458	4.52472			145	KCl, 30 mM	4.54767
146	KCl, 30 mM	8.2079	6.12565	20.2767	9.34975	2.00029	7.49793	4.73752	7.58202	2.82411	10.6524	3.42017	2.82804	2.33677	2.78168	4.00507	5.95204	4.80159	11.5855	2.62608	8.38644	5.01159	8.54639	7.12418	5.20099	3.51459	1.69553	3.24651	1.99676	8.05572	6.53961	9.48892	2.05503	0.709775	2.92851	9.0703	1.96341	1.60777	10.731	1.17103	14.8791	13.9423	6.03553	4.26651			146	KCl, 30 mM	6.26751
147	KCl, 30 mM	7.46285	5.98821	17.3253	6.46078	1.78597	5.84162	3.07523	6.60369	2.74778	6.78557	3.19951	3.27321	2.37016	2.44788	3.46179	6.57793	4.45553	11.0668	2.46255	7.45228	5.03043	7.64148	7.05633	5.01235	3.80457	1.69553	3.04867	1.48881	6.91224	6.22261	6.78413	1.60747	0.833214	3.27305	6.96792	2.13051	1.51845	8.84405	1.23992	13.5086	12.6845	5.32072	3.60895			147	KCl, 30 mM	4.78305
148	KCl, 30 mM	7.18687	4.74907	10.2725	4.5173	1.21446	5.35566	2.59317	5.62537	2.74778	5.24255	2.69515	3.103	2.48699	2.22535	3.41126	4.53717	3.30921	9.5105	2.25093	6.28721	3.46667	7.82246	6.53615	4.23085	3.64218	1.39276	2.69793	1.27863	4.75377	5.40076	7.74485	1.51711	0.678915	3.10078	6.2471	1.83809	1.14628	10.0639	1.05623	15.2902	13.1962	4.69325	3.32782			148	KCl, 30 mM	4.05277
149	KCl, 30 mM	6.37297	4.29033	7.43608	4.30718	1.25732	4.16552	2.29396	5.27073	2.5188	4.88933	2.17504	3.24701	2.53706	2.22535	3.41126	4.01439	3.39572	9.55374	2.00563	6.39217	2.6	7.0382	6.17429	3.95239	2.73744	1.41294	2.85981	1.22608	5.16491	5.81168	6.0599	1.26601	0.709775	3.7037	6.20205	2.38116	1.20583	9.03466	1.07919	13.7631	12.0663	4.34656	2.95045			149	KCl, 30 mM	3.62853
150	KCl, 30 mM	6.81449	4.33619	4.86794	3.67686	1.1716	3.88788	2.42694	5.00168	2.86227	4.77778	2.52178	3.77072	2.58157	11.4605	3.4281	4.3781	3.39572	8.47299	1.62086	6.5706	2.41159	6.89744	6.0612	4.41051	2.71424	1.41294	3.18356	1.15602	4.23985	5.14246	4.641	1.10106	0.709775	2.92851	5.64641	2.19317	1.22071	8.93935	0.987341	14.7029	11.7892	4.40278	3.10497			150	KCl, 30 mM	3.34587
151	KCl, 30 mM	6.37297	4.15267	5.13626	3.78192	0.82869	3.83818	2.04461	4.36577	2.44247	4.25725	2.25384	3.52197	2.57045	12.1949	3.79028	3.57314	2.855	8.08393	1.73148	6.87499	2.46811	5.97242	5.54103	4.03324	2.57505	1.45331	2.80585	1.26987	3.99574	4.98983	6.37029	1.05799	0.87436	3.61757	5.9017	2.40205	2.00971	8.4819	1.26288	12.4123	10.2329	4.25363	2.84384			151	KCl, 30 mM	3.66386
152	KCl, 30 mM	6.46964	4.47376	3.87136	4.04456	0.928707	3.01498	1.79527	3.36299	2.13716	3.19758	2.56906	3.02442	1.71641	7.49942	2.78586	4.20144	2.76849	6.05214	1.48138	6.00381	2.18551	5.38925	5.81242	4.32068	2.36626	1.17072	2.40116	1.01589	3.07068	4.87242	6.28161	0.949771	0.853788	2.84238	4.89556	1.33679	1.4589	8.08163	1.12511	12.2752	11.3628	3.79188	2.65752			152	KCl, 30 mM	4.44142
153	KCl, 30 mM	5.32467	4.93276	3.44972	4.67488	1.10016	2.78685	1.77865	2.69039	1.71736	3.73671	2.01743	3.31247	1.93896	8.25603	2.37524	2.51159	2.81174	7.17611	1.3948	5.59446	1.80869	5.91209	4.79469	3.72782	2.12267	1.3322	2.3472	1.00714	3.00644	5.02505	5.11397	0.906695	0.884647	3.01465	4.32491	1.19058	1.89062	6.25183	1.14807	7.87024	9.95577	3.4931	2.22613			153	KCl, 30 mM	4.04107
154	KCl, 30 mM	5.46266	4.74907	3.64138	4.20214	0.928707	3.46133	1.77865	3.03281	1.94635	3.27195	1.78101	3.27321	1.74145	8.67885	2.17099	2.48281	2.16288	8.30008	1.30342	4.55534	1.65797	5.38925	4.74945	3.45834	2.11107	1.31202	2.37418	0.963348	2.98074	4.5202	4.44885	0.770113	0.78178	3.01465	3.8744	1.27413	1.16117	14.7337	1.33176	7.12629	9.93445	3.58276	2.83125			154	KCl, 30 mM	3.71114
155	KCl, 30 mM	5.44889	4.31328	3.14308	3.30918	0.885843	2.75714	1.84514	2.49473	2.21349	2.97449	1.67068	3.02442	1.69694	7.81097	3.11435	2.27418	2.31428	5.87922	1.32266	4.69179	1.37536	4.8463	4.4102	3.29665	1.86749	0.98906	1.89755		2.78802	3.93316	4.53754	0.804783	0.689201	2.92851	3.88942	1.25324	2.4712	7.94821	1.3088	5.46218	10.1263	3.2502	2.08832			155	KCl, 30 mM	3.89949
156	KCl, 30 mM	5.14536	4.72617	2.83644	3.7294	0.82869	2.82665	1.29658	2.54364	2.06084	3.23476	1.6234	2.91971	1.94731	8.56759	4.00507	2.03597	2.5522	5.7063	1.02927	5.01717	0.960868	5.30881	4.86253	3.17988	1.79789	1.19091	1.51984	0.87577	2.76233	3.79227	5.02528	0.697619	0.78178	2.41171	3.52901	1.00259	0.848545	5.69908	1.07919	8.77082	7.58941	3.12972	2.13114			156	KCl, 30 mM	4.20579
157	KCl, 30 mM	4.63498	4.45085	2.72145	3.20412	0.600087	2.54882	2.06124	2.42135	1.87002	2.69564	1.30818	3.39105	1.71641	7.92223	1.6572	3.14788	2.33591	4.79848	1.03889	4.51335	1.11159	4.72565	4.34236	3.04514	1.99508	1.11017	1.61876	0.595524	2.71093	3.20523	4.24193	0.686062	0.8435	2.32558	3.2587	1.04437	2.03949	5.18445	0.987341	7.83109	9.5294	2.96269	2.03882			157	KCl, 30 mM	4.30009
158	KCl, 30 mM	5.46266	5.0702	2.5298	3.04654	0.5858	1.98364	1.47944	1.94442	1.71736	2.52832	1.49731	2.33053	1.23515	6.56477	2.79849	1.80895	2.68197	4.15004	0.947504	3.97805	0.942028	5.40936	4.43282	2.55109	1.77469	0.908322	1.53782	0.683101	2.37689	3.3109	4.44885	0.607265	0.894933	2.67011	3.30375	1.23235	1.17605	4.68887	1.26288	7.51784	8.91116	2.80444	1.96236			158	KCl, 30 mM	4.24112
159	KCl, 30 mM	4.93851	4.74907	2.45313		0.685813	2.28108	1.61242	1.99334	1.79369	2.75141	2.4745	2.38287	1.11831	6.80956	2.92694	1.76819	2.11962	5.10109	0.990791	0.472328	0.753624		6.4683	2.49719	1.7631	0.928505	1.35796	0.648071	2.63385	2.84127	4.36017	0.558935	0.802354	1.98106	3.30375	0.919042	1.20583	4.47921	1.33176	8.35968	8.10105	2.68506	2.06473			159	KCl, 30 mM	4.34737
160	KCl, 30 mM																																														160	KCl, 30 mM
Graph 3J
									Area Under Curve 16.7mM
n=39		Age (Years)	BMI (Kg/m2)	Gender			n=39		Insulin sec/100islets		% Beta-cell	DNA content (ng/ 100 islets)	ng beta-cell DNA in 100 islets
ND without Autoantibodies	HPAP004	24	32.2	Female			ND without Autoantibodies	HPAP004	21.44		37.7563	561.6	212.04
	HPAP005	14	24.1	Female				HPAP005	17.76		22.7013	443.733	100.733
	HPAP006	46	19.1	Male				HPAP006	24.93		13.588	409.067	55.5841
	HPAP011	3	17.6	Male				HPAP011	10.36		9.91559	422.933	41.9364
	HPAP012	18	29.6	Female				HPAP012	23.76		36.4531	416	151.645
	HPAP014	43	30.93	Female				HPAP014	63.82		52.5145	651.733	342.255
	HPAP018	31	24.47	Male				HPAP018	26.9		31.3323	762.667	238.961
	HPAP022	39	34.7	Female				HPAP022	59.98		42.5898	426.4	181.603
	HPAP034	13	18.6	Male				HPAP034	12.52		17.0889	161.2	27.5473
	HPAP035	35	26.91	Male				HPAP035	64.4		31.8441	663	211.127
	HPAP036	23	16	Female				HPAP036	31.4		34.521	626.6	216.309
	HPAP059	35	37.96	Male				HPAP059	9.114		18.7237	414.267	77.5659
	HPAP063	45	38.41	Female				HPAP063	21.45		32.9791	165.533	54.5913
	HPAP066	58	31.07	Female				HPAP066	19.15		21.7188	814.667	176.935
	HPAP067	26	34.97	Male				HPAP067	12.39		24.0805	862.333	207.655
	HPAP069	47	24.86	Female				HPAP069	38.99		12.0481	95.3333	11.4858
	HPAP074	40	36.88	Female				HPAP074	96.87		50.5348	123.2	62.2588
	HPAP075	35	27.52	Male				HPAP075	94.02		49.6213	509.333	252.738
	HPAP082	25	23.96	Male				HPAP082	6.75		18.4295	312	57.5
	HPAP095	23	34.32	Female				HPAP095	56.11		25.9003	1045.33	270.745
	HPAP099	28	24.7	Female				HPAP099	52.34		23.029	386.667	89.0454
	HPAP101	55	38.01	Female				HPAP101	64.27		57.9818	669.333	388.091
	HPAP103	48	36.44	Female				HPAP103	52.68		44.9021	685.333	307.729
	HPAP104	4	20.63	Male				HPAP104	17.91		25.8031	405.333	104.589
	HPAP105	51	28.1	Female				HPAP105	45.76		57.9147	608	352.121
	HPAP110	31	36.29	Male				HPAP110	39.39		59.4714	177.6	105.621
	HPAP117	64	32.39	Male				HPAP117	47.97		40.538	354.667	143.775
	HPAP118	51	33.01	Female				HPAP118	90.64		44.3611	594.667	263.801
	HPAP119	48	29.45	Female				HPAP119	91.13		35.2385	469.333	165.386
	HPAP121	42	28.85	Male				HPAP121	66.8		66.0978	554.667	366.623
	HPAP122	21	30.05	Female				HPAP122	11.76		50.6323	376	190.377
	HPAP125	38	24.17	Male				HPAP125	6.641		6.04687	173.333	10.4812
	HPAP127	53	31	Male				HPAP127	48.81		34.6828	216.267	75.0073
	HPAP128	49	30.12	Male				HPAP128	28.55		26.5977	464.533	123.555
	HPAP129	19	18.01	Female				HPAP129	27.09		34.9864	97.6	34.1467
	HPAP131	23	22.5	Male				HPAP131	110.7		27.3253	50.9333	13.9177
	HPAP132	5	15.71	Female				HPAP132	9.177		22.6829	717.333	162.712
	HPAP139	22	26.52	Male				HPAP139	108.4		26.6034	1261	335.469
	HPAP140	29	31.71	Female				HPAP140	97.26		24.431	345.333	84.3683
									Area Under Curve 16.7mM
n=12		Age (Years)	BMI (Kg/m2)	Gender			n=12		Insulin sec/100islets		% Beta-cell	DNA content (ng/ 100 islets)	ng beta-cell DNA in 100 islets
ND with Autoantibodies	HPAP003	29	24.5	Male			ND with Autoantibodies	HPAP003	23.59		40.1898	412.533	165.796
	HPAP008	24	31.9	Female				HPAP008	18.85		36.5372	547.733	200.126
	HPAP009	3	14.9	Male				HPAP009	7.82		26.081	433.333	113.018
	HPAP016	30	25.21	Male				HPAP016	3.59		7.26978	261.04	18.977
	HPAP017	30	23.7	Male				HPAP017	33.16		36.68	679.467	249.229
	HPAP019	22	29.8	Male				HPAP019	62.29		41.3803	578.933	239.564
	HPAP024	18	24.3	Male				HPAP024	6.603		29.9957	300.3	90.0771
	HPAP029	23	28.6	Male				HPAP029	34.23		35.0707	1352	474.156
	HPAP060	30	26.2	Male				HPAP060	5.609		5.90727	428.133	25.291
	HPAP092	21	25.59	Male				HPAP092	5.53		3.7146	762.667	28.33
	HPAP107	15	23.59	Male				HPAP107	32.78		22.8823	992	226.992
	HPAP148							HPAP148	38.49		30.376	2420	735.099
									Area Under Curve 16.7mM
n=25		Age (Years)	BMI (Kg/m2)	Gender	Duration of disease (Years)		n=25		Insulin sec/100islets		% Beta-cell	DNA content (ng/ 100 islets)	ng beta-cell DNA in 100 islets
T2D	HPAP001	47	32.2	Male	20		T2D	HPAP001	11.38		17.0932	811.2	138.66
	HPAP010	42	36.8	Female	2			HPAP010	27.61		35.4272	610.133	216.153
	HPAP013	28	41.6	Female	5			HPAP013	29.78		44.3492	821.6	364.373
	HPAP061	59	38.27	Female	Unknown			HPAP061	22.68		18.2197	700.267	127.586
	HPAP062	56	26.48	Male	4_5			HPAP062	12.63		12.7772	1560	199.324
	HPAP065	40	37.47	Male	3			HPAP065	13.21		11.7197	596.267	69.8808
	HPAP070	55	17.09	Male	16			HPAP070	6.25		6.35232	2903.33	184.429
	HPAP079	52	28.38	Female	10			HPAP079	13.44		32.5006	600	195.004
	HPAP081	45	28.91	Female	20			HPAP081	14.92		29.9787	166.933	50.0444
	HPAP083	45	35.62	Male	2-3 years			HPAP083	15.5		12.1286	216.267	26.2302
	HPAP085	48	39.78	Female	6-10 years			HPAP085	40.55		54.0156	157.6	85.1286
	HPAP088	37	32.81	Male	10 days			HPAP088	18.23		15.9505	501.333	79.965
	HPAP090	59	32.23	Female	4			HPAP090	50.31		50.6454	746.667	378.152
	HPAP091	50	35.58	Female	3 months			HPAP091	24.42		23.3334	250.933	58.5513
	HPAP096	56	38.7	Female	1			HPAP096	21.16		41.2168	400	164.867
	HPAP100	41	28.83	Male	7-8 years			HPAP100	5.786		7.54884	666.667	50.3256
	HPAP106	55	28.12	Male	3 years			HPAP106	46.9		27.2006	738.667	200.922
	HPAP108	42	33	Male	NA			HPAP108	4.539		10.3961	1045.33	108.674
	HPAP109	59	29.49	Female	<5 years			HPAP109	18.83		34.7939	770.667	268.145
	HPAP115	46	28.72	Male	5-6 years			HPAP115	13.22		13.787	517.333	71.3247
	HPAP120	63	29.6	Female	2-3 years			HPAP120	14.9		29.4797	760	224.046
	HPAP124	47	30.96	Male	10 years			HPAP124	53.46		61.1351	349.333	213.565
	HPAP126	50	31.01	Female	1 month			HPAP126	35.38		48.7571	888	432.963
	HPAP133	49	25.42	Female	NA			HPAP133	38.3		33.066	442.667	146.372
	HPAP142	43	23.48	Male	0-5 years			HPAP142	9.965		23.8146	171.6	40.8659
									Area Under Curve 16.7mM
n=9		Age (Years)	BMI (Kg/m2)	Gender	Duration of disease (Years)		n=9		Insulin sec/100islets		% Beta-cell	DNA content (ng/ 100 islets)	ng beta-cell DNA in 100 islets
T1D	HPAP002	26	16.4	Male	5		T1D	HPAP002	0.8337		0.98659	196.213	1.93582
	HPAP015	29	22.03	Male	7			HPAP015	0.2359		0.385159	592.8	2.28322
	HPAP020	14	13.2	Male				HPAP020	1.298		3.73076	405.6	15.132
	HPAP071	12	15.42	Female	3			HPAP071	1.296		2.7576	472	13.0159
	HPAP084	12	18.5	Female	NA			HPAP084	4.506		33.7886	656	221.653
	HPAP102	18	20.65	Male	6 years			HPAP102	1.013		0.820858	185.333	1.52132
	HPAP113	9	15.92	Male	recent DKA			HPAP113	9.714		18.9678	1176	223.061
	HPAP123	25	21.35	Male	3 years			HPAP123	2.906		9.45468	328	31.0114
	HPAP138	35	23.63	Female	8 years			HPAP138	18.51		17.925	180.7	32.3904
[truncated: 55 more columns]

## Sheet: Supplementary Figure 2 
Graph S2A
n=41	ND without Autoantibodies	Donor ID	Age (Years)	BMI (Kg/m2)	Gender		n=41	ND without Autoantibodies		PTPRE	PRDM2	GRB10	FBXW12	SPATA21	Average
		HPAP004	24	32.2	Female				HPAP004	4.24769	4.0661	3.07956	4.93061	2.33012	3.73082
		HPAP005	14	24.1	Female				HPAP005	27.6152	20.9439	20.2388	20.7409	22.0437	22.3165
		HPAP006	46	19.1	Male				HPAP006	32.5932	32.2476	34.7219	35.5012	33.6218	33.7371
		HPAP011	3	17.6	Male				HPAP011	36.2691	37.5692	37.9858	35.5163		36.8351
		HPAP012	18	29.6	Female				HPAP012	7.78796	8.21391	6.4909	8.95207	4.90452	7.26987
		HPAP014	43	30.93	Female				HPAP014	3.40749	6.19374	6.28833	4.29996	3.12915	4.66374
		HPAP018	31	24.47	Male				HPAP018	15.4919	21.3047	17.4263	21.4556	15.283	18.1923
		HPAP022	39	34.7	Female				HPAP022	1.36212	2.32663	1.3627	2.67241	2.19782	1.98434
		HPAP035	35	26.91	Male				HPAP035	9.42571	8.51323		9.76665	11.5267	9.80807
		HPAP036	23	16	Female				HPAP036	11.3827	12.0002		13.9249	11.299	12.1517
		HPAP037	35	21.9	Female				HPAP037	3.37559	4.40109		5.37216	4.62759	4.44411
		HPAP042	1	17.9	Male				HPAP042	60.1142	58.8202		58.2582	50.3311	56.8809
		HPAP056	33	32.89	Male				HPAP056	26.8021	23.5333		27.8926	29.7956	27.0059
		HPAP063	45	38.41	Female				HPAP063	5.03465	5.70848		7.12688	5.60085	5.86772
		HPAP066	58	31.07	Female				HPAP066	23.9082	24.5723	27.5102	26.1652	23.0761	25.0464
		HPAP067	26	34.97	Male				HPAP067	10.7394	12.3174		13.5831	9.58848	11.5571
		HPAP069	47	24.86	Female				HPAP069	35.7303	36.8325		39.9966	45.0351	39.3986
		HPAP074	40	36.88	Female				HPAP074	1.47171	4.04007		3.4243	2.50838	2.86112
		HPAP075	35	27.52	Male				HPAP075	5.11629	6.02185	3.14149	6.66907	4.797	5.14914
		HPAP077	47	32.78	Male				HPAP077	4.20286	5.32949		5.19504	3.19614	4.48088
		HPAP080	22	35.71	Male				HPAP080	4.65548	6.47248	3.48143	5.46041	4.47124	4.90821
		HPAP095	23	34.32	Female				HPAP095	4.2276	6.28081		6.61755	5.46395	5.64748
		HPAP099	28	24.7	Female				HPAP099	4.94546	8.04401	5.00657	6.32721	5.20478	5.90561
		HPAP101	55	38.01	Female				HPAP101	2.63138	4.0447	3.5355	3.61242	3.36818	3.43844
		HPAP103	48	36.44	Female				HPAP103	7.06882	1.82616		9.90244	1.23721	5.00866
		HPAP104	4	20.63	Male				HPAP104	22.4168	22.0445		23.1298	18.3819	21.4933
		HPAP105	51	28.1	Female				HPAP105	2.15846	3.4657		3.0845	3.37806	3.02168
		HPAP110	31	36.29	Male				HPAP110	5.79587	6.47705	5.14436	5.10004	5.65479	5.63442
		HPAP116	41	31.63	Female				HPAP116	14.6617	17.0457	12.8307	17.5752	14.225	15.2677
		HPAP117	64	32.39	Male				HPAP117	4.44686	8.44269	5.90044	7.01332	6.00007	6.36068
		HPAP118	51	33.01	Female				HPAP118	9.66785	12.6216	11.3349	14.6267	9.22266	11.4948
		HPAP119	48	29.45	Female				HPAP119	5.06949	9.38304	5.98053	7.06788	5.38101	6.57639
		HPAP121	42	28.85	Male				HPAP121	3.25714	4.42419	2.51128	3.54595	2.89338	3.32639
		HPAP122	21	30.05	Female				HPAP122	6.45087	5.95923	5.68249	7.98328	9.68283	7.15174
		HPAP125	38	24.17	Male				HPAP125	48.7081	49.147		48.5002	54.9101	50.3163
		HPAP127	53	31	Male				HPAP127	4.67512	7.44612	7.03621	6.78338	5.14547	6.21726
		HPAP128	49	30.12	Male				HPAP128	5.27959	7.82326	6.31405	6.21007	6.72493	6.47038
		HPAP129	19	18.01	Female				HPAP129	4.30505	5.59914		5.77845	4.8212	5.12596
		HPAP131	23	22.5	Male				HPAP131	5.23368	8.34208		6.40124	5.3993	6.34407
		HPAP132	5	15.71	Female				HPAP132	26.4921	26.0416		28.1935	26.6231	26.8376
		HPAP139	22	26.52	Male				HPAP139	13.7845	16.116	13.252	13.3028	13.0805	13.9071
n=15	ND with Autoantibodies	Donor ID	Age (Years)	BMI (Kg/m2)	Gender		n=15	ND with Autoantibodies		PTPRE	PRDM2	GRB10	FBXW12	SPATA21	Average
		HPAP003	29	24.5	Male				HPAP003	2.81432	3.42962	2.42534	3.05436	2.23822	2.79237
		HPAP008	24	31.9	Female				HPAP008	12.8914	16.7614	15.9857	17.3278	14.7307	15.5394
		HPAP009	3	14.9	Male				HPAP009	17.5975	22.5511	21.2455	19.2112	16.8678	19.4946
		HPAP016	30	25.21	Male				HPAP016	31.4643	32.3045	38.8894	31.268	30.8727	32.9598
		HPAP017	30	23.7	Male				HPAP017	2.63751	4.73036	5.01771	3.67058	4.10051	4.03133
		HPAP019	22	29.8	Male				HPAP019	3.83716	6.87607	6.10309	7.38152	5.93617	6.0268
		HPAP024	18	24.3	Male				HPAP024	25.0967	30.4708		28.5253	1.23721	21.3325
		HPAP029	23	28.6	Male				HPAP029	13.1933	13.8948	13.7523	17.167	12.7403	14.1495
		HPAP045	27	26.2	Female				HPAP045	17.3247	14.1514		20.8942	17.5019	17.4681
		HPAP060	30	26.2	Male				HPAP060	36.7267	27.0374	40.0043	40.422	37.4871	36.3355
		HPAP072	19	23.1	Male				HPAP072	10.1338	9.60761		10.7149	11.1672	10.4059
		HPAP092	21	25.59	Male				HPAP092	33.1587	32.8397	31.0033	35.2684	30.5412	32.5623
		HPAP107	15	23.59	Male				HPAP107	41.5285	38.1581	40.0576	40.4566	38.5045	39.741
		HPAP114	21	25.66	Female				HPAP114	7.47465	9.56153	9.56939	10.9431	8.41056	9.19185
		HPAP148	7	14.9	Male				HPAP148	16.1739	16.1288		15.3117	14.1149	15.4323
n=26	T2D	Donor ID	Age (Years)	BMI (Kg/m2)	Gender	Duration of disease (Years)	n=26	T2D		PTPRE	PRDM2	GRB10	FBXW12	SPATA21	Average
		HPAP001	47	32.2	Male	20			HPAP001	25.6491	29.7591	26.6289	32.1938	25.1843	27.883
		HPAP010	42	36.8	Female	2			HPAP010	14.1635	13.2743	10.2484	12.6611	9.76648	12.0228
		HPAP013	28	41.6	Female	5			HPAP013	3.87161	4.94644	4.97024	4.54559	3.88015	4.44281
		HPAP061	59	38.27	Female	Unknown			HPAP061	33.5121	37.2314	44.4932	38.4827	41.9269	39.1293
		HPAP062	56	26.48	Male	4_5			HPAP062	14.2944	18.7949		16.5452	16.0995	16.4335
		HPAP065	40	37.47	Male	3			HPAP065	22.1946	15.9586	16.4441	24.2763	20.5148	19.8777
		HPAP070	55	17.09	Male	16			HPAP070	38.9539	39.8294	43.2302	44.7675	48.9734	43.1509
		HPAP079	52	28.38	Female	10			HPAP079	16.4273	13.3897		15.6677	15.8313	15.329
		HPAP081	45	28.91	Female	20			HPAP081	9.45739	10.5523	7.32727	10.3282	11.0961	9.75226
		HPAP083	45	35.62	Male	2-3 years			HPAP083	24.0384	26.3599	20.7388	24.6893	22.7778	23.7208
		HPAP085	48	39.78	Female	6-10 years			HPAP085	6.86515	7.40044		7.46488	8.31176	7.51056
		HPAP088	37	32.81	Male	10 days			HPAP088	32.1151	33.5587		34.5909	29.7637	32.5071
		HPAP091	50	35.58	Female	3 months			HPAP091	13.826	17.0522	14.7863	14.5392	14.7664	14.994
		HPAP096	56	38.7	Female	1			HPAP096	9.04302	11.4314	8.303	9.03542	7.62299	9.08716
		HPAP100	41	28.83	Male	7-8 years			HPAP100	31.4219	32.0616		36.0054	33.8303	33.3298
		HPAP106	55	28.12	Male	3 years			HPAP106	13.218	14.4826		13.6305	16.1758	14.3767
		HPAP108	42	33	Male	NA			HPAP108	30.2585	31.24	33.6214	31.5879	31.8684	31.7152
		HPAP109	59	29.49	Female	<5 years			HPAP109	21.1952	20.6271	21.8762	22.6997	17.7276	20.8251
		HPAP111	63	24.25	Male	NA			HPAP111	7.06118	7.57731	7.29306	7.71673	7.59364	7.44838
		HPAP115	46	28.72	Male	5-6 years			HPAP115	17.3505	17.9268	20.8729	18.1015	19.9511	18.8406
		HPAP120	63	29.6	Female	2-3 years			HPAP120	2.49781	4.58248	3.38436	5.38913	3.69605	3.90997
		HPAP124	47	30.96	Male	10 years			HPAP124	2.3556	3.57294	2.46032	3.31146	3.26051	2.99217
		HPAP126	50	31.01	Female	1 month			HPAP126	2.97865	7.52691		4.52755	4.37414	4.85181
		HPAP133	49	25.42	Female	NA			HPAP133	11.7205	11.5475	11.5465	12.4656	11.5197	11.76
		HPAP142	43	23.48	Male	0-5 years			HPAP142	20.2922	22.8571		21.2962	18.8157	20.8153
		HPAP144	61	32.56	Male	6 months			HPAP144	18.0158	17.513	16.1481	21.4383	15.1507	17.6532
		Donor ID	Age (Years)	BMI (Kg/m2)	Gender	Duration of disease (Years)	n=10	T1D		PTPRE	PRDM2	GRB10	FBXW12	SPATA21	Average
n=10	T1D	HPAP002	26	16.4	Male	5			HPAP002	56.9665	61.3685	69.7549	61.5372	66.2218	63.1698
		HPAP015	29	22.03	Male	7			HPAP015	40.6909	42.9181	48.3049	41.9578	45.3913	43.8526
		HPAP020	14	13.2	Male				HPAP020	31.1894	34.0208	31.0833	36.1542	29.3868	32.3669
		HPAP071	12	15.42	Female	3			HPAP071	15.0095	15.3125		18.6585	12.604	15.3962
		HPAP084	12	18.5	Female	NA			HPAP084	11.4259	12.8398	11.1968	12.1766	10.7364	11.6751
		HPAP087	15	19.3	Female	6-10 years			HPAP087	56.4787	51.8691		58.9861	47.2328	53.6417
		HPAP102	18	20.65	Male	6 years			HPAP102	33.4507	37.618	40.075	37.3578	30.9684	35.894
		HPAP113	9	15.92	Male	recent DKA			HPAP113	31.9152	33.0013	31.7577	35.5018	29.8692	32.409
		HPAP123	25	21.35	Male	3 years			HPAP123	2.01902	4.53184	1.67591	3.59038	2.82025	2.92748
		HPAP138	35	23.63	Female	8 years			HPAP138	6.22095	5.44316	4.85905	5.34148	5.30136	5.4332
Graph S2B
n=41	ND without Autoantibodies	Donor ID	Age (Years)	BMI (Kg/m2)	Gender		n=41	ND without Autoantibodies		CCDC73	PDX1-AS1	PELI2	Average
		HPAP004	24	32.2	Female				HPAP004	38.1183	19.5825	40.8186	32.8398
		HPAP005	14	24.1	Female				HPAP005	5.20919	4.27926	7.95279	5.81375
		HPAP006	46	19.1	Male				HPAP006	2.5324	1.18651	2.78727	2.16873
		HPAP011	3	17.6	Male				HPAP011	6.3034	1.51249	7.25272	5.02287
		HPAP012	18	29.6	Female				HPAP012	18.836	7.04616	23.2071	16.3631
		HPAP014	43	30.93	Female				HPAP014	19.7654	14.3376	22.9001	19.001
		HPAP018	31	24.47	Male				HPAP018	18.1436	5.76868	15.1357	13.016
		HPAP022	39	34.7	Female				HPAP022	34.1616	23.1952	40.3933	32.5834
		HPAP035	35	26.91	Male				HPAP035	33.2357	13.5227	34.444	27.0675
		HPAP036	23	16	Female				HPAP036	25.3184	12.6456	23.9347	20.6329
		HPAP037	35	21.9	Female				HPAP037	15.5769	10.2489	20.582	15.4693
		HPAP042	1	17.9	Male				HPAP042	0.312332	1.2862	0.467847	0.688792
		HPAP056	33	32.89	Male				HPAP056	17.0748	13.0737	17.8402	15.9962
		HPAP063	45	38.41	Female				HPAP063	18.6132	22.9664	23.883	21.8209
		HPAP066	58	31.07	Female				HPAP066	12.8968	19.5788	19.3289	17.2682
		HPAP067	26	34.97	Male				HPAP067	28.9779	28.8349	31.4013	29.7381
		HPAP069	47	24.86	Female				HPAP069	5.73694	6.87346	10.3363	7.6489
		HPAP074	40	36.88	Female				HPAP074	18.4175	17.8243	24.3727	20.2048
		HPAP075	35	27.52	Male				HPAP075	17.9036	18.9739	23.5072	20.1282
		HPAP077	47	32.78	Male				HPAP077	20.9388	23.6271	28.0348	24.2002
		HPAP080	22	35.71	Male				HPAP080	21.9875	21.1558	27.4477	23.5304
		HPAP095	23	34.32	Female				HPAP095	49.237	39.3417	50.8128	46.4638
		HPAP099	28	24.7	Female				HPAP099	45.4327	37.6837	47.4406	43.519
		HPAP101	55	38.01	Female				HPAP101	14.9706	16.1822	20.6124	17.2551
		HPAP103	48	36.44	Female				HPAP103	19.6445	13.5194	22.6522	18.6054
		HPAP104	4	20.63	Male				HPAP104	8.5836	7.16384	12.5027	9.41671
		HPAP105	51	28.1	Female				HPAP105	27.7326	9.43465	29.6189	22.2621
		HPAP110	31	36.29	Male				HPAP110	11.5364	8.16862	15.6875	11.7975
		HPAP116	41	31.63	Female				HPAP116	19.8264	16.191	24.9627	20.3267
		HPAP117	64	32.39	Male				HPAP117	9.93638	7.35659	12.6848	9.9926
		HPAP118	51	33.01	Female				HPAP118	14.5354	8.93526	17.9133	13.7947
		HPAP119	48	29.45	Female				HPAP119	37.4171	31.6278	38.1072	35.7174
		HPAP121	42	28.85	Male				HPAP121	9.9307	3.98564	10.6373	8.18455
		HPAP122	21	30.05	Female				HPAP122	9.22867	8.01285	13.7529	10.3315
		HPAP125	38	24.17	Male				HPAP125	2.46331	8.88321	1.77908	4.3752
		HPAP127	53	31	Male				HPAP127	22.0154	14.5163	19.4391	18.657
		HPAP128	49	30.12	Male				HPAP128	35.0131	27.186	35.7909	32.6634
		HPAP129	19	18.01	Female				HPAP129	11.9843	15.9272	19.2877	15.7331
		HPAP131	23	22.5	Male				HPAP131	26.849	28.4327	31.2889	28.8568
		HPAP132	5	15.71	Female				HPAP132	6.328	3.63703	8.46632	6.14378
		HPAP139	22	26.52	Male				HPAP139	11.5	10.0139	13.2043	11.5727
n=15	ND with Autoantibodies	Donor ID	Age (Years)	BMI (Kg/m2)	Gender		n=15	ND with Autoantibodies		CCDC73	PDX1-AS1	PELI2	Average
		HPAP003	29	24.5	Male				HPAP003	25.4249	15.4825	28.1469	23.0181
		HPAP008	24	31.9	Female				HPAP008	16.1665	7.23747	17.3229	13.5756
		HPAP009	3	14.9	Male				HPAP009	9.57269	14.8527	19.5323	14.6526
		HPAP016	30	25.21	Male				HPAP016	1.0951	2.51756	0.767285	1.45998
		HPAP017	30	23.7	Male				HPAP017	32.9053	18.9973	33.3594	28.4206
		HPAP019	22	29.8	Male				HPAP019	20.6974	14.3604	26.6444	20.5674
		HPAP024	18	24.3	Male				HPAP024	5.95133	2.15653	7.31304	5.1403
		HPAP029	23	28.6	Male				HPAP029	10.1785	6.9694	13.4813	10.2097
		HPAP045	27	26.2	Female				HPAP045	16.7172	13.68	21.3099	17.2357
		HPAP060	30	26.2	Male				HPAP060	2.21235	9.35487	2.17876	4.58199
		HPAP072	19	23.1	Male				HPAP072	9.46678	10.4849	15.279	11.7435
		HPAP092	21	25.59	Male				HPAP092	0.287103	4.28396	0.745024	1.77203
		HPAP107	15	23.59	Male				HPAP107	6.83623	1.64806	6.96489	5.14973
		HPAP114	21	25.66	Female				HPAP114	23.2745	13.5445	26.9676	21.2622
		HPAP148	7	14.9	Male				HPAP148	3.99108	4.09011	7.11431	5.06517
n=26	T2D	Donor ID	Age (Years)	BMI (Kg/m2)	Gender	Duration of disease (Years)	n=26	T2D		CCDC73	PDX1-AS1	PELI2	Average
		HPAP001	47	32.2	Male	20			HPAP001	8.79957	1.58179	11.2158	7.19905
		HPAP010	42	36.8	Female	2			HPAP010	31.0271	18.3395	32.3897	27.2521
		HPAP013	28	41.6	Female	5			HPAP013	28.7036	21.0442	37.7045	29.1507
		HPAP061	59	38.27	Female	Unknown			HPAP061	8.57391	7.81988	12.5421	9.64531
		HPAP062	56	26.48	Male	4_5			HPAP062	7.41128	5.09558	11.6733	8.06007
		HPAP065	40	37.47	Male	3			HPAP065	0.670432	3.46481	2.70879	2.28134
		HPAP070	55	17.09	Male	16			HPAP070	4.58577	2.15254	8.57306	5.10379
		HPAP079	52	28.38	Female	10			HPAP079	22.4121	21.442	30.7695	24.8745
		HPAP081	45	28.91	Female	20			HPAP081	23.6331	17.698	34.7771	25.3694
		HPAP083	45	35.62	Male	2-3 years			HPAP083	14.2057	19.5471	18.6463	17.4664
		HPAP085	48	39.78	Female	6-10 years			HPAP085	12.3583	4.82344	16.3082	11.1633
		HPAP088	37	32.81	Male	10 days			HPAP088	7.22185	5.79781	11.5483	8.18932
		HPAP091	50	35.58	Female	3 months			HPAP091	21.4035	16.9959	22.3086	20.236
		HPAP096	56	38.7	Female	1			HPAP096	18.6075	18.6337	21.8813	19.7075
		HPAP100	41	28.83	Male	7-8 years			HPAP100	4.85427	4.62827	8.93724	6.13993
		HPAP106	55	28.12	Male	3 years			HPAP106	34.7945	12.9777	35.4508	27.741
		HPAP108	42	33	Male	NA			HPAP108	2.84595	3.45065	6.16466	4.15375
		HPAP109	59	29.49	Female	<5 years			HPAP109	19.4686	17.4476	27.6525	21.5229
		HPAP111	63	24.25	Male	NA			HPAP111	29.0281	17.3348	31.1224	25.8284
		HPAP115	46	28.72	Male	5-6 years			HPAP115	4.30758	0.00455169	9.10622	4.47278
		HPAP120	63	29.6	Female	2-3 years			HPAP120	36.4314	28.2814	45.4343	36.7157
		HPAP124	47	30.96	Male	10 years			HPAP124	17.6425	7.97932	17.5328	14.3849
		HPAP126	50	31.01	Female	1 month			HPAP126	15.6283	14.8385	17.418	15.9616
		HPAP133	49	25.42	Female	NA			HPAP133	35.1289	24.5422	35.1863	31.6192
		HPAP142	43	23.48	Male	0-5 years			HPAP142	17.4898	17.8236	21.9718	19.0951
		HPAP144	61	32.56	Male	6 months			HPAP144	8.88094	10.0395	13.0371	10.6525
n=10	T1D	Donor ID	Age (Years)	BMI (Kg/m2)	Gender	Duration of disease (Years)	n=10	T1D		CCDC73	PDX1-AS1	PELI2	Average
		HPAP002	26	16.4	Male	5			HPAP002	0.303102	1.373	0.720337	0.798814
		HPAP015	29	22.03	Male	7			HPAP015	3.00322	3.95016	1.09488	2.68275
		HPAP020	14	13.2	Male				HPAP020	2.44152	6.45248	6.38967	5.09456
		HPAP071	12	15.42	Female	3			HPAP071	37.6158	36.9519	49.6751	41.4142
		HPAP084	12	18.5	Female	NA			HPAP084	12.6241	12.5538	19.2905	14.8228
		HPAP087	15	19.3	Female	6-10 years			HPAP087	1.89302	6.92623	0.955485	3.25825
		HPAP102	18	20.65	Male	6 years			HPAP102	1.82217	5.99448	3.43764	3.75143
		HPAP113	9	15.92	Male	recent DKA			HPAP113		5.30357	15.5413	10.4224
		HPAP123	25	21.35	Male	3 years			HPAP123	69.6193	61.2069	63.7985	64.8749
		HPAP138	35	23.63	Female	8 years			HPAP138	49.2099	45.5083	53.4351	49.3844
Graph S2C
n=41	ND without Autoantibodies	Donor ID	Age (Years)	BMI (Kg/m2)	Gender		n=41	ND without Autoantibodies		Insulin	FBXL19	DLG5	Average
		HPAP004	24	32.2	Female				HPAP004	37.3982	36.5804	39.2904	37.7563
		HPAP005	14	24.1	Female				HPAP005	25.7165	23.4258	18.9615	22.7013
		HPAP006	46	19.1	Male				HPAP006	13.5224	16.8143	13.5484	14.6284
		HPAP011	3	17.6	Male				HPAP011	10.7325	8.23019	10.7841	9.91559
		HPAP012	18	29.6	Female				HPAP012	33.83	39.5611	35.9681	36.4531
		HPAP014	43	30.93	Female				HPAP014	56.6442	54.5852	46.3141	52.5145
		HPAP018	31	24.47	Male				HPAP018	28.3756	29.7789	35.8425	31.3323
		HPAP022	39	34.7	Female				HPAP022	39.1213	42.1776	46.4705	42.5898
		HPAP035	35	26.91	Male				HPAP035	32.951	30.3467	32.2347	31.8441
		HPAP036	23	16	Female				HPAP036	36.5401	31.8376	35.1852	34.521
		HPAP037	35	21.9	Female				HPAP037	49.8086	43.8745	38.6724	44.1185
		HPAP042	1	17.9	Male				HPAP042	0.986869	2.01197	4.9572	2.65201
		HPAP056	33	32.89	Male				HPAP056	26.2643	22.8281	25.7972	24.9632
		HPAP063	45	38.41	Female				HPAP063	34.991	33.6208	30.3254	32.9791
		HPAP066	58	31.07	Female				HPAP066	19.924	21.2523	23.98	21.7188
		HPAP067	26	34.97	Male				HPAP067	24.7412	24.6876	22.8128	24.0805
		HPAP069	47	24.86	Female				HPAP069	12.9624	9.15791	14.0239	12.0481
		HPAP074	40	36.88	Female				HPAP074	51.7453	50.849	49.01	50.5348
		HPAP075	35	27.52	Male				HPAP075	51.4109	50.9235	46.5293	49.6213
		HPAP077	47	32.78	Male				HPAP077	46.4721	41.3826	44.875	44.2432
		HPAP080	22	35.71	Male				HPAP080	38.6652	35.9055	38.7953	37.7887
		HPAP095	23	34.32	Female				HPAP095	27.5062	27.9936	22.2011	25.9003
		HPAP099	28	24.7	Female				HPAP099	24.0293	20.9455	24.1121	23.029
		HPAP101	55	38.01	Female				HPAP101	57.7937	56.3503	59.8013	57.9818
		HPAP103	48	36.44	Female				HPAP103	45.4289	42.1553	47.1221	44.9021
		HPAP104	4	20.63	Male				HPAP104	29.1524	26.7579	21.499	25.8031
		HPAP105	51	28.1	Female				HPAP105	62.6093	53.6385	57.4962	57.9147
		HPAP110	31	36.29	Male				HPAP110	60.5309	60.6007	57.2827	59.4714
		HPAP116	41	31.63	Female				HPAP116	36.5987	29.0091	36.323	33.9769
		HPAP117	64	32.39	Male				HPAP117	43.2757	36.7981	41.5401	40.538
		HPAP118	51	33.01	Female				HPAP118	44.5027	43.2623	45.3182	44.3611
		HPAP119	48	29.45	Female				HPAP119	36.5095	33.3651	35.8407	35.2385
		HPAP121	42	28.85	Male				HPAP121	70.7267	66.2437	61.323	66.0978
		HPAP122	21	30.05	Female				HPAP122	59.7162	46.9195	45.2611	50.6323
		HPAP125	38	24.17	Male				HPAP125	5.80596	4.25497	8.07968	6.04687
		HPAP127	53	31	Male				HPAP127	36.7014	31.9726	35.3743	34.6828
		HPAP128	49	30.12	Male				HPAP128	28.921	22.1645	28.7076	26.5977
		HPAP129	19	18.01	Female				HPAP129	37.8127	34.427	32.7194	34.9864
		HPAP131	23	22.5	Male				HPAP131	29.9535	24.803	27.2195	27.3253
		HPAP132	5	15.71	Female				HPAP132	25.4791	21.8364	20.7333	22.6829
		HPAP139	22	26.52	Male				HPAP139	30.5235	26.6635	22.6232	26.6034
n=15	ND with Autoantibodies	Donor ID	Age (Years)	BMI (Kg/m2)	Gender		n=15	ND with Autoantibodies		Insulin	FBXL19	DLG5	Average
		HPAP003	29	24.5	Male				HPAP003	44.5401	32.9663	43.0631	40.1898
		HPAP008	24	31.9	Female				HPAP008	38.7728	39.8454	30.9934	36.5372
		HPAP009	3	14.9	Male				HPAP009	27.4844	29.6354	21.1232	26.081
		HPAP016	30	25.21	Male				HPAP016	6.21734	5.00357	10.5884	7.26978
		HPAP017	30	23.7	Male				HPAP017	38.5825	35.2817	36.1759	36.68
		HPAP019	22	29.8	Male				HPAP019	39.5922	41.6564	42.8922	41.3803
		HPAP024	18	24.3	Male				HPAP024	29.3005	27.0678	33.6188	29.9957
		HPAP029	23	28.6	Male				HPAP029	38.3844	30.6404	36.1874	35.0707
		HPAP045	27	26.2	Female				HPAP045	36.0197	31.3758	33.2435	33.5463
		HPAP060	30	26.2	Male				HPAP060	5.54116	4.03818	8.14247	5.90727
		HPAP072	19	23.1	Male				HPAP072	34.8416	33.3053	34.4041	34.1837
		HPAP092	21	25.59	Male				HPAP092	2.9514	2.62546	5.56695	3.7146
		HPAP107	15	23.59	Male				HPAP107	25.8277	19.48	23.3391	22.8823
		HPAP114	21	25.66	Female				HPAP114	44.493	43.0139	37.0967	41.5345
		HPAP148	7	14.9	Male				HPAP148	33.4529	31.6086	26.0665	30.376
n=26	T2D	Donor ID	Age (Years)	BMI (Kg/m2)	Gender	Duration of disease (Years)	n=26	T2D		Insulin	FBXL19	DLG5	Average
		HPAP001	47	32.2	Male	20			HPAP001	19.0615	13.0628	19.1552	17.0932
		HPAP010	42	36.8	Female	2			HPAP010	33.6812	36.5378	36.0625	35.4272
		HPAP013	28	41.6	Female	5			HPAP013	42.3766	44.5174	46.1537	44.3492
		HPAP061	59	38.27	Female	Unknown			HPAP061	18.0912	15.4261	21.1418	18.2197
		HPAP062	56	26.48	Male	4_5			HPAP062	12.6692	9.81825	15.844	12.7772
		HPAP065	40	37.47	Male	3			HPAP065	11.9406	9.19185	14.0267	11.7197
		HPAP070	55	17.09	Male	16			HPAP070	4.39153	5.54106	9.12438	6.35232
		HPAP079	52	28.38	Female	10			HPAP079	32.3439	32.0483	33.1097	32.5006
		HPAP081	45	28.91	Female	20			HPAP081	32.2742	26.312	31.3499	29.9787
		HPAP083	45	35.62	Male	2-3 years			HPAP083	11.8216	10.9736	13.5907	12.1286
		HPAP085	48	39.78	Female	6-10 years			HPAP085	58.0282	51.9698	52.0488	54.0156
		HPAP088	37	32.81	Male	10 days			HPAP088	17.0191	13.6904	17.1419	15.9505
		HPAP091	50	35.58	Female	3 months			HPAP091	23.5769	20.7449	25.6783	23.3334
		HPAP096	56	38.7	Female	1			HPAP096	43.2754	39.8706	40.5044	41.2168
		HPAP100	41	28.83	Male	7-8 years			HPAP100	6.34007	6.66045	9.64601	7.54884
		HPAP106	55	28.12	Male	3 years			HPAP106	30.9003	22.1891	28.5124	27.2006
		HPAP108	42	33	Male	NA			HPAP108	9.77428	8.44448	12.9696	10.3961
		HPAP109	59	29.49	Female	<5 years			HPAP109	36.7522	32.2191	35.4103	34.7939
		HPAP111	63	24.25	Male	NA			HPAP111	47.5492	43.4907	46.4084	45.8161
		HPAP115	46	28.72	Male	5-6 years			HPAP115	13.8746	10.7637	16.7226	13.787
		HPAP120	63	29.6	Female	2-3 years			HPAP120	32.0637	26.1587	30.2168	29.4797
		HPAP124	47	30.96	Male	10 years			HPAP124	62.1049	62.7993	58.5011	61.1351
		HPAP126	50	31.01	Female	1 month			HPAP126	50.5464	45.4718	50.253	48.7571
		HPAP133	49	25.42	Female	NA			HPAP133	33.2963	32.3755	33.5263	33.066
		HPAP142	43	23.48	Male	0-5 years			HPAP142	27.0577	20.104	24.2821	23.8146
		HPAP144	61	32.56	Male	6 months			HPAP144	28.0199	21.9969	26.8525	25.6231
n=10	T1D	Donor ID	Age (Years)	BMI (Kg/m2)	Gender	Duration of disease (Years)	n=10	T1D		Insulin	FBXL19	DLG5	Average
		HPAP002	26	16.4	Male	5			HPAP002	0.962956	1.2181	0.98659	1.05588
		HPAP015	29	22.03	Male	7			HPAP015	0.326014	0.27821	0.551253	0.385159
		HPAP020	14	13.2	Male				HPAP020	3.3093	3.3591	2.99162	3.22001
		HPAP071	12	15.42	Female	3			HPAP071	2.26308	4.95276	1.05696	2.7576
		HPAP084	12	18.5	Female	NA			HPAP084	31.4912	48.5637	21.311	33.7886
		HPAP087	15	19.3	Female	6-10 years			HPAP087		0.231365	0.212169	0.221767
		HPAP102	18	20.65	Male	6 years			HPAP102	0.657706	1.27739	0.527482	0.820858
		HPAP113	9	15.92	Male	recent DKA			HPAP113	19.8681	24.0106	13.0246	18.9678
		HPAP123	25	21.35	Male	3 years			HPAP123	8.88833	12.4644	7.01135	9.45468
		HPAP138	35	23.63	Female	8 years			HPAP138	14.9781	26.2811	12.5156	17.925
Graph S2D
Insulin secretion per 100 islets		N=41																																												n=12
Area under curve in high glucose		ND without Autoantibodies																																												ND with Autoantibodies
Time (min)	Stimulus	HPAP004	HPAP005	HPAP006	HPAP011	HPAP012	HPAP014	HPAP018	HPAP022	HPAP034	HPAP035	HPAP036	HPAP042	HPAP056	HPAP059	HPAP063	HPAP066	HPAP067	HPAP069	HPAP074	HPAP075	HPAP082	HPAP095	HPAP099	HPAP101	HPAP103	HPAP104	HPAP105	HPAP110	HPAP117	HPAP118	HPAP119	HPAP121	HPAP122	HPAP125	HPAP127	HPAP128	HPAP129	HPAP131	HPAP132	HPAP139	HPAP140		Time (min)	Stimulus	HPAP003	HPAP008	HPAP009	HPAP016
81	Amino acid Mixure, 4 mM + Glucose, 16.7 mM	0.33542	0.37083	0.221181	0.099653	0.148264	0.99896	0.420486	0.313542	0.155217	0.405903	0.30625	0.013194	0.100694	0.129861	0.145139	0.217882	0.226042	0.497222	0.629514	0.413194	0.101389	0.802083	0.573611	0.449653	0.442361	0.138542	0.240625	0.167708	0.957639	0.369444	0.510417	0.604167	0.311111	0.140972	0.359722	0.336111	0.226042	1.14479	0.182292	1.56042	0.636806		81	Amino acid Mixure, 4 mM + Glucose, 16.7 mM	0.11932	0.230903	0.119097	0.1125
82	Amino acid Mixure, 4 mM + Glucose, 16.7 mM	0.39062	0.39062	0.229167	0.15625	0.119792	1.0729	0.572917	0.4375	0.273913	0.5625	0.489583	0.013542	0.111806	0.124306	0.128472	0.240104	0.244792	0.604167	0.744792	0.421875	0.135417	1.04688	0.609375	0.432292	0.526042	0.114583	0.265625	0.197917	0.979167	0.411458	0.661458	0.513889	0.3125	0.114583	0.385417	0.311111	0.25	3.69271	0.302083	1.54167	0.895833		82	Amino acid Mixure, 4 mM + Glucose, 16.7 mM	0.15625	0.255208	0.21875	0.161111
83	Amino acid Mixure, 4 mM + Glucose, 16.7 mM	0.35937	0.51562	0.182292	0.104167	0.177083	1.1979	0.390625	0.640625	0.293478	1.29688	0.578125	0.052778	0.4125	0.261806	0.534722	0.329514	0.489583	0.723958	4.02604	1.91146	0.145833	2.64583	1.88542	1.45833	3.23438	0.484375	0.947917	0.755208	1.73438	1.48438	2.30729	1.1625	0.260417	0.286458	0.588542	0.583333	0.375	3.90104	0.598958	1.32292	3.21354		83	Amino acid Mixure, 4 mM + Glucose, 16.7 mM	0.17992	0.25	0.15625	0.119444
84	Amino acid Mixure, 4 mM + Glucose, 16.7 mM	0.56771	0.39062	0.291667	0.125	0.119792	1.1823	0.307292	1.84375	0.795652	5.01042	1.33854	0.192361	0.352083	0.866667	1.38889	0.515104	1.11458	2.58854	8.27083	8	0.53125	4.07292	4.67708	4.64583	6.17708	2.27083	4.02604	3.9375	3.35417	7.01562	7.08854	4.71944	0.375	0.578125	3.54688	2.75556	2.13021	8.97917	0.630208	1.8125	10.4167		84	Amino acid Mixure, 4 mM + Glucose, 16.7 mM	0.17519	0.255208	0.177083	0.152778
85	Amino acid Mixure, 4 mM + Glucose, 16.7 mM	0.99479	0.52604	0.213542	0.125	0.177083	1.2292	0.588542	2.61458	1.03696	6.27604	2.01562	0.240972	2.29167	0.970833	1.38889	1.075	1.29167	3.60938	10.1458	9.28125	0.579861	3.35938	4.51562	6.05729	4.33333	1.86458	4.14062	4.59896	4.01562	9.53125	8	5.55556	0.661458	0.567708	5.20833	2.93333	3.40625	7.89062	0.552083	4.47917	8.39583		85	Amino acid Mixure, 4 mM + Glucose, 16.7 mM	0.15152	0.239583	0.151042	0.133333
86	Amino acid Mixure, 4 mM + Glucose, 16.7 mM	1.776	1.0885	0.229167	0.630208	1.04167	1.6094	0.520833	2.65104	0.873913	4.46875	2.28125	0.173611	1.47083	0.75	1.38889	1.36094	1.07292	3.5	9.90625	7.59896	0.423611	2.92708	3.59896	4.53125	3.15104	1	2.99479	3.94271	3.57292	6.42188	6.66146	3.80278	0.911458	0.40625	5.19271	2.27222	2.52604	5.79688	0.515625	2.93056	8.67708		86	Amino acid Mixure, 4 mM + Glucose, 16.7 mM	0.40246	0.510417	0.192708	0.177778
87	Amino acid Mixure, 4 mM + Glucose, 16.7 mM	1.7969	1.1354	0.255208	1.5	3.25	3.5469	1.33333	2.9375	0.678261	3.53646	2.02604	0.148958	0.995833	0.458333	1.38889	1.4625	0.697917	2.48438	7.25	4.71354	0.333333	2.46354	3.04167	3.11979	2.33854	0.677083	2.3125	2.53125	3.25	4.70312	5.34896	4.21389	0.947917	0.354167	3.47917	2.26667	1.77083	6.1875	0.40625	2.55556	5.97917		87	Amino acid Mixure, 4 mM + Glucose, 16.7 mM	1.3636	1.27083	0.390625	0.180556
88	Amino acid Mixure, 4 mM + Glucose, 16.7 mM	1.7135	1.0313	0.416667	0.947917	2.71875	4.9479	1.98958	3.82292	0.554348	3.20833	2.17188	0.140625	0.879167	0.445833	1.27014	1.30208	0.661458	2.2	6.10417	4.42188	0.427083	2.65625	2.40625	3.51562	2.32812	0.661458	2.16146	2.23438	2.33854	4.01562	4.07292	3.81667	0.96875	0.296875	2.98958	1.40556	1.3125	5.21354	0.359375	10.4167	4.52604		88	Amino acid Mixure, 4 mM + Glucose, 16.7 mM	2.2348	1.84375	0.640625	0.238889
89	Amino acid Mixure, 4 mM + Glucose, 16.7 mM	1.4688	0.9375	0.838542	0.65625	1.93229	4.974	2.16146	4.08854	0.580435	3.04167	2.19271	0.144792	0.854167	0.4	1.20556	1.20469	0.494792	1.78889	4.89062	3.82292	0.392361	2.82812	2.33854	3.1875	2.33333	0.671875	2.16667	1.91146	2.44792	4.25521	4.63542	3.11111	0.703125	0.333333	2.375	1.32778	1.13021	5.22917	0.380208	10.3906	5.16667		89	Amino acid Mixure, 4 mM + Glucose, 16.7 mM	1.9839	1.67188	0.828125	0.252778
90	Amino acid Mixure, 4 mM + Glucose, 16.7 mM	1.1667	0.94792	1.48958	0.4375	1.53125	5.0208	2.20312	4.71354	0.626087	2.97396	1.69271	0.159375	0.9375	0.491667	1.24097	1.09896	0.557292	2.46354	4.07292	3.89062	0.368056	2.83333	2.51042	3.18229	2.55729	0.901042	2.39062	1.80729	2.55729	4.5625	4.26042	3.45556	0.53125	0.328125	2.17188	1.25556	1.15625	6.74479	0.505208	8.38021	3.99479		90	Amino acid Mixure, 4 mM + Glucose, 16.7 mM	1.8703	1.26042	0.59375	0.227778
91	Amino acid Mixure, 4 mM + Glucose, 16.7 mM	1.1927	0.94271	2.08333	0.453125	1.125	4.8177	2.01042	4.86458	0.63913	3.31771	1.71354	0.164236	1.08333	0.433333	1.38056	1.02708	0.515625	2.01042	4.05729	4.24479	0.284722	3.00521	2.53125	2.82812	2.57292	0.869792	2.35417	1.82292	2.46354	4.82292	4.47396	3.22222	0.541667	0.380208	2.17188	1.49444	1.46875	5.90625	0.458333	4.54167	3.90625		91	Amino acid Mixure, 4 mM + Glucose, 16.7 mM	1.411	1.1875	0.4375	0.219444
92	Amino acid Mixure, 4 mM + Glucose, 16.7 mM	1.125	0.97917	2.17188	0.567708	1.01042	3.4583	1.54167	3.60938	0.554348	2.56771	1.85417	0.147917	0.754167	0.370833	1.02986	1.25573	0.53125	1.69792	4.22917	4.99479	0.284722	2.96875	2.88021	3.57812	2.69271	0.96875	2.375	1.84375	2.17708	4.72917	5.18229	3.34722	0.604167	0.364583	2.05208	1.33333	1.20312	5	0.416667	5.03125	4.40104		92	Amino acid Mixure, 4 mM + Glucose, 16.7 mM	1.3258	1.04688	0.401042	0.19444
93	Amino acid Mixure, 4 mM + Glucose, 16.7 mM	1.1302	1.0729	2.30208	0.614583	1.24479	2.974	1.70312	3.94792	0.63913	3.30208	1.80208	0.168056	0.941667	0.3875	1.26597	1.11354	0.640625	1.89444	4.32812	5.17188	0.46875	3.10417	2.97917	3.56771	2.65104	0.942708	2.55208	1.79167	2.52604	4.85938	5.26562	3.73611	0.552083	0.338542	2.01042	1.30556	1.13021	5.8125	0.552083	7.29688	4.55208		93	Amino acid Mixure, 4 mM + Glucose, 16.7 mM	1.5152	1.15104	0.442708	0.175
94	Amino acid Mixure, 4 mM + Glucose, 16.7 mM	1.3021	0.98958	2.32292	0.609375	1.29688	3.8958	1.69271	4.31771	0.743478	3.66146		0.182986	1.08333	0.45	1.22569	1.15417	0.541667	2.09896	4.58854	4.69792	0.607639	3.28125	2.69271	3.54167	2.72396	0.984375	2.44271	1.73958	2.01562	4.82292	4.41667	4.025	0.729167	0.354167	2.63542	1.35	1.10938	5.67708	0.682292	6.83333	4.5625		94	Amino acid Mixure, 4 mM + Glucose, 16.7 mM	1.4299	1.0625	0.46875	0.197222
95	Amino acid Mixure, 4 mM + Glucose, 16.7 mM	1.2292	1.0052	2.16667	0.5625	1.47396	4.0937	1.66667	3.73958	0.678261	3.92188	1.79167	0.192361	0.916667	0.458333	1.11667	1.13698	0.598958	1.80208	4.63021	4.77083	0.329861	3.41146	2.75521	3.53125	2.70833	0.932292	2.47396	1.8125	2.34896	4.65104	4.51042	4.38611	0.567708	0.40625	2.47396	1.48333	1.17188	5.96875	0.6875	8.75521	4.58854		95	Amino acid Mixure, 4 mM + Glucose, 16.7 mM	1.5246	1.07292	0.416667	0.188889
96	Amino acid Mixure, 4 mM + Glucose, 16.7 mM	1.0833	1.3021	2.1875	0.546875	1.29167	4.6562	1.625	4.15625	0.821739	3.90625	1.46354	0.214931	0.8875	0.554167	1.24167	1.03802	0.619792	2.08333	3.81771	5.74479	0.479167	3.15625	2.47396	3.65625	2.56771	0.916667	2.36979	1.82812	3.01562	5.09896	5.91146	3.75278	0.583333	0.3125	2.53125	1.32778	1.21875	6.05208	0.510417	5.51042	4.69271		96	Amino acid Mixure, 4 mM + Glucose, 16.7 mM	1.7282	1.16146	0.484375	0.222222
97	Amino acid Mixure, 4 mM + Glucose, 16.7 mM	1.0833	1.1719	2.16146	0.614583	1.41146	4.6667	1.65104	3.63542	0.697826	4.375	1.69792	0.234722	0.933333	0.5	0.940278	1.03281	0.630208	2.07292	4.17188	5.26562	0.28125	3.19792	2.92708	3.82292	2.73958	0.963542	2.41667	1.85417	2.35938	5.52083	4.69792	3.83611	0.755208	0.34375	2.48958	1.41667	1.65104	6.45312	0.453125	9.06771	5.65104		97	Amino acid Mixure, 4 mM + Glucose, 16.7 mM	1.8513	1.10938	0.447917	0.222222
98	Amino acid Mixure, 4 mM + Glucose, 16.7 mM	1.1927	1.2708	2.1875	0.609375	1.39583	3.9062	1.92708	3.17708	0.769565	3.41146	1.75521	0.199306	0.908333	0.383333	1.16042	1.0651	0.635417	2.03125	4.30729	6.05729	0.239583	3.44271	2.85938	3.79688	2.53646	0.973958	2.98958	1.75521	2.4375	5.42188	5.10417	3.69167	0.625	0.328125	2.67708	1.36111	1.7	5.97396	0.442708	7.53646	5.13542		98	Amino acid Mixure, 4 mM + Glucose, 16.7 mM	1.5578	1.41146	0.53125	0.163889
99	Amino acid Mixure, 4 mM + Glucose, 16.7 mM	1.1667	1.25	2.07812	0.692708	1.58854	3.7917	1.74479	2.94792	0.763043	3.20833	1.68229	0.19375	1.20833	0.5	1.38889	1.08594	0.625	2.03646	4.74479	5.97917	0.260417	3.45312	3.02604	3.47917	2.79688	1.09896	2.79688	1.96354	2.57812	5.42188	5.17188	3.71944	0.671875	0.322917	2.28646	1.47222	1.55729	6.5	0.4375	5.59896	5.35938		99	Amino acid Mixure, 4 mM + Glucose, 16.7 mM	1.8939	1.27604	0.520833	0.194444
100	Amino acid Mixure, 4 mM + Glucose, 16.7 mM	1.0677	1.25	2.02604	0.708333	1.55729	4.5573	2.11458	3.34896	0.854348	4.30729	1.8125	0.226389	1.0125	0.483333	1.38889	1.08906	0.619792	2.09375	4.53125	5.65104	0.253472	3.71354	2.6875	4.22396	2.97396	1.08333	2.91667	1.94792	2.64583	5.41667	6.21354	4.85278	0.614583	0.307292	2.73438	1.45	1.42188	6.39062	0.390625	7.17188	5.66146		100	Amino acid Mixure, 4 mM + Glucose, 16.7 mM	1.5483	1.40104	0.520833	0.222222
	AUC	21.44	17.76	24.93	10.36	23.76	63.82	26.9	59.98	12.52	64.4	31.4	3.085	17.58	9.114	21.45	19.15	12.39	38.99	96.87	94.02	6.75	56.11	52.34	64.27	52.68	17.91	45.76	39.39	47.97	90.64	91.13	66.8	11.76	6.641	48.81	28.55	27.09	110.7	9.177	108.4	97.26			AUC	23.59	18.85	7.82	3.59
Graph S2E
Insulin secretion per insulin content		N=41																																												n=12
Area under curve in high glucose		ND without Autoantibodies																																												ND with Autoantibodies
Time (min)	Stimulus	HPAP004	HPAP005	HPAP006	HPAP011	HPAP012	HPAP014	HPAP018	HPAP022	HPAP034	HPAP035	HPAP036	HPAP042	HPAP056	HPAP059	HPAP063	HPAP066	HPAP067	HPAP069	HPAP074	HPAP075	HPAP082	HPAP095	HPAP099	HPAP101	HPAP103	HPAP104	HPAP105	HPAP110	HPAP117	HPAP118	HPAP119	HPAP121	HPAP122	HPAP125	HPAP127	HPAP128	HPAP129	HPAP131	HPAP132	HPAP139	HPAP140		Time (min)	Stimulus	HPAP003	HPAP008	HPAP009	HPAP016
81	Amino acid Mixure, 4 mM + Glucose, 16.7 mM	0.110336	0.106867	0.0844847	0.0989603	0.170811	0.248066	0.253458	0.0615996	0.14188	0.249326	0.186057	0.0949209	0.949943	0.0991305	0.0874858	0.0592071	0.0649546	0.175078	0.247062	0.0823096	0.247895	0.264365	0.320453	0.0776603	0.124259	0.0338733	0.0528846	0.0388303	0.404067	0.155229	0.179094	0.112424	0.127505	0.349806	0.0961824	0.466821	0.0482996	0.275853	0.0540926	0.0966202	0.0746549		81	Amino acid Mixure, 4 mM + Glucose, 16.7 mM	0.053991	0.108303	0.0902934	0.359425
82	Amino acid Mixure, 4 mM + Glucose, 16.7 mM	0.128493	0.112571	0.0875351	0.155164	0.138009	0.266427	0.345339	0.0859528	0.250378	0.345516	0.297438	0.0974245	1.05477	0.0948901	0.0774394	0.0652458	0.0703425	0.212735	0.292305	0.0840388	0.331093	0.345048	0.340433	0.0746618	0.147765	0.0280154	0.0583791	0.0458247	0.413151	0.172882	0.232091	0.095625	0.128074	0.284325	0.103053	0.432099	0.0534188	0.889809	0.0896389	0.0954593	0.105021		82	Amino acid Mixure, 4 mM + Glucose, 16.7 mM	0.0707014	0.119704	0.165845	0.514732
83	Amino acid Mixure, 4 mM + Glucose, 16.7 mM	0.118214	0.148594	0.0696303	0.103443	0.204013	0.297467	0.235458	0.12586	0.268261	0.796606	0.35123	0.379698	3.89151	0.199852	0.322316	0.0895418	0.140685	0.254915	1.58008	0.380769	0.35656	0.872061	1.05331	0.251871	0.908532	0.118429	0.208333	0.174857	0.731804	0.623687	0.809576	0.216319	0.106728	0.710814	0.157364	0.810185	0.0801282	0.94001	0.177732	0.0819144	0.376734		83	Amino acid Mixure, 4 mM + Glucose, 16.7 mM	0.0814118	0.117261	0.118461	0.38161
84	Amino acid Mixure, 4 mM + Glucose, 16.7 mM	0.186747	0.112571	0.111408	0.124131	0.138009	0.293593	0.185227	0.36223	0.727287	3.07765	0.813209	1.38389	3.32154	0.661578	0.837184	0.139974	0.320282	0.911458	3.24601	1.59363	1.2989	1.34242	2.6129	0.802389	1.73514	0.555216	0.884844	0.911669	1.41526	2.94774	2.48721	0.878199	0.153689	1.43455	0.948362	3.82716	0.455173	2.16365	0.187005	0.112229	1.22118		84	Amino acid Mixure, 4 mM + Glucose, 16.7 mM	0.0792715	0.119704	0.134255	0.488109
85	Amino acid Mixure, 4 mM + Glucose, 16.7 mM	0.327234	0.151597	0.0815668	0.124131	0.204013	0.30524	0.354757	0.513671	0.947858	3.85506	1.22456	1.73361	21.6195	0.741094	0.837184	0.29212	0.371169	1.27091	3.98188	1.84885	1.41775	1.10724	2.5227	1.04616	1.21723	0.455888	0.910027	1.06482	1.69436	4.00473	2.80702	1.03378	0.271089	1.4087	1.3926	4.07407	0.727831	1.90136	0.163823	0.277348	0.984271		85	Amino acid Mixure, 4 mM + Glucose, 16.7 mM	0.0685611	0.112375	0.114513	0.425984
86	Amino acid Mixure, 4 mM + Glucose, 16.7 mM	0.584211	0.313689	0.0875351	0.625827	1.20008	0.399652	0.313944	0.520833	0.798824	2.74493	1.38594	1.249	13.8758	0.572519	0.837184	0.36982	0.308309	1.23239	3.88785	1.51374	1.03572	0.96476	2.01059	0.782599	0.885124	0.244499	0.658196	0.912875	1.50756	2.69827	2.33735	0.707625	0.373548	1.00806	1.38842	3.15586	0.539753	1.39684	0.153004	0.181459	1.01724		86	Amino acid Mixure, 4 mM + Glucose, 16.7 mM	0.182109	0.239408	0.146102	0.567981
87	Amino acid Mixure, 4 mM + Glucose, 16.7 mM	0.591086	0.327205	0.097482	1.48957	3.74424	0.88078	0.803697	0.577112	0.619983	2.17227	1.23089	1.07164	9.39465	0.349873	0.837184	0.397418	0.200551	0.87478	2.84537	0.938953	0.814995	0.811978	1.69926	0.538824	0.656894	0.165546	0.508242	0.586073	1.37131	1.9761	1.87683	0.784125	0.388491	0.878826	0.930259	3.14815	0.378383	1.49096	0.120549	0.158239	0.700957		87	Amino acid Mixure, 4 mM + Glucose, 16.7 mM	0.617014	0.596076	0.296152	0.576856
88	Amino acid Mixure, 4 mM + Glucose, 16.7 mM	0.563651	0.297205	0.159155	0.941328	3.1322	1.22868	1.19927	0.751064	0.506717	1.97072	1.31949	1.01169	8.29403	0.340331	0.765605	0.353827	0.190074	0.774648	2.39567	0.880852	1.04421	0.875494	1.34427	0.607189	0.653968	0.161726	0.475046	0.517336	0.986727	1.68724	1.42909	0.71021	0.397029	0.736663	0.799354	1.95216	0.280449	1.25628	0.106639	0.644995	0.530603		88	Amino acid Mixure, 4 mM + Glucose, 16.7 mM	1.01122	0.864798	0.48569	0.763224
89	Amino acid Mixure, 4 mM + Glucose, 16.7 mM	0.483158	0.270173	0.320299	0.651688	2.22614	1.23516	1.30287	0.80325	0.530562	1.86835	1.33214	1.04167	8.05818	0.305344	0.726676	0.327361	0.142182	0.62989	1.9194	0.761537	0.959318	0.932144	1.30645	0.550518	0.655431	0.164273	0.476191	0.44257	1.03288	1.7879	1.62646	0.578919	0.288166	0.827129	0.635027	1.84414	0.241497	1.26004	0.112821	0.643383	0.605705		89	Amino acid Mixure, 4 mM + Glucose, 16.7 mM	0.897692	0.784182	0.627843	0.807597
90	Amino acid Mixure, 4 mM + Glucose, 16.7 mM	0.383783	0.273176	0.568977	0.434459	1.76411	1.24678	1.32798	0.92604	0.572292	1.82676	1.02838	1.14658	8.84434	0.375318	0.748024	0.29863	0.160141	0.867444	1.59848	0.775025	0.899892	0.933861	1.40247	0.549619	0.71834	0.220304	0.525412	0.418451	1.07903	1.91702	1.49488	0.643014	0.217725	0.814206	0.580715	1.74383	0.247062	1.62525	0.149913	0.518898	0.468323		90	Amino acid Mixure, 4 mM + Glucose, 16.7 mM	0.84629	0.59119	0.450152	0.727725
91	Amino acid Mixure, 4 mM + Glucose, 16.7 mM	0.392336	0.271674	0.795773	0.449975	1.29608	1.19635	1.21182	0.955714	0.584214	2.0379	1.04103	1.18155	10.2201	0.330789	0.832162	0.279099	0.148168	0.707893	1.59234	0.845576	0.696142	0.99051	1.41411	0.48845	0.722729	0.212663	0.517399	0.422069	1.03947	2.02644	1.56981	0.599595	0.221995	0.943444	0.580715	2.07562	0.313835	1.42319	0.136004	0.281218	0.457943		91	Amino acid Mixure, 4 mM + Glucose, 16.7 mM	0.638462	0.556989	0.331691	0.701099
92	Amino acid Mixure, 4 mM + Glucose, 16.7 mM	0.370066	0.282182	0.829593	0.563762	1.16407	0.858778	0.929275	0.709111	0.506717	1.57722	1.12647	1.06415	7.11478	0.283079	0.620772	0.341231	0.152658	0.597858	1.6598	0.994978	0.696142	0.978494	1.60905	0.617984	0.756379	0.236858	0.521978	0.426893	0.9186	1.98704	1.81835	0.622855	0.247609	0.904672	0.548685	1.85185	0.257078	1.20482	0.12364	0.311533	0.515949		92	Amino acid Mixure, 4 mM + Glucose, 16.7 mM	0.59991	0.49103	0.30405	0.621214
93	Amino acid Mixure, 4 mM + Glucose, 16.7 mM	0.371776	0.309193	0.879329	0.610311	1.43409	0.738515	1.0266	0.775622	0.584214	2.02831	1.09483	1.20904	8.88365	0.295802	0.763093	0.302593	0.184088	0.667058	1.69864	1.03025	1.14609	1.02313	1.66434	0.616184	0.744675	0.230491	0.560897	0.414834	1.06584	2.04175	1.84759	0.69522	0.226264	0.840055	0.537545	1.81327	0.241497	1.4006	0.163823	0.451819	0.533656		93	Amino acid Mixure, 4 mM + Glucose, 16.7 mM	0.685611	0.539888	0.335639	0.559105
94	Amino acid Mixure, 4 mM + Glucose, 16.7 mM	0.428322	0.285182	0.887287	0.605139	1.4941	0.96742	1.02032	0.848273	0.679596	2.24905		1.31645	10.2201	0.343511	0.738815	0.313632	0.155651	0.73907	1.80084	0.93584	1.48567	1.08149	1.50431	0.611687	0.765157	0.240678	0.536859	0.402774	0.850475	2.02644	1.54971	0.748977	0.298839	0.878826	0.704657	1.875	0.237046	1.36797	0.202461	0.423117	0.534877		94	Amino acid Mixure, 4 mM + Glucose, 16.7 mM	0.647014	0.498358	0.355383	0.630102
95	Amino acid Mixure, 4 mM + Glucose, 16.7 mM	0.404342	0.289683	0.827604	0.55859	1.69811	1.01656	1.00462	0.734692	0.619983	2.40901	1.0885	1.38389	8.6478	0.349873	0.673096	0.308962	0.172114	0.634536	1.81719	0.950365	0.806506	1.12441	1.53922	0.609888	0.760768	0.227944	0.543727	0.419657	0.991122	1.95422	1.5826	0.816172	0.232667	1.00806	0.661486	2.06018	0.250401	1.43825	0.204006	0.542118	0.53793		95	Amino acid Mixure, 4 mM + Glucose, 16.7 mM	0.689864	0.503244	0.315896	0.603479
96	Amino acid Mixure, 4 mM + Glucose, 16.7 mM	0.356349	0.375245	0.835561	0.543073	1.4881	1.15625	0.979506	0.816552	0.751133	2.39942	0.889151	1.54627	8.37264	0.423028	0.748443	0.282071	0.178101	0.733568	1.49832	1.14438	1.17156	1.04029	1.3821	0.631477	0.721266	0.224124	0.520833	0.423275	1.27242	2.14242	2.0742	0.698321	0.239071	0.775434	0.676805	1.84414	0.260417	1.45833	0.151459	0.341202	0.550142		96	Amino acid Mixure, 4 mM + Glucose, 16.7 mM	0.781991	0.544774	0.367229	0.709974
97	Amino acid Mixure, 4 mM + Glucose, 16.7 mM	0.356349	0.337723	0.825614	0.610311	1.6261	1.15885	0.995203	0.714227	0.637867	2.68735	1.03154	1.68865	8.80503	0.381679	0.566774	0.280656	0.181094	0.7299	1.63731	1.04893	0.687653	1.05403	1.63524	0.660262	0.769546	0.235585	0.531136	0.429305	0.995517	2.31968	1.64839	0.713828	0.309511	0.852978	0.665664	1.96759	0.352787	1.55497	0.134458	0.561468	0.66249		97	Amino acid Mixure, 4 mM + Glucose, 16.7 mM	0.837692	0.520345	0.339588	0.709974
98	Amino acid Mixure, 4 mM + Glucose, 16.7 mM	0.392336	0.366225	0.835561	0.605139	1.6081	0.970002	1.16159	0.624181	0.703441	2.09549	1.06635	1.43386	8.56918	0.292621	0.699468	0.28943	0.182591	0.715229	1.69046	1.20663	0.585778	1.13471	1.59742	0.655764	0.712488	0.238132	0.657051	0.406392	1.02848	2.2781	1.79094	0.68695	0.256148	0.814206	0.715798	1.89043	0.363248	1.43951	0.131367	0.466654	0.602042		98	Amino acid Mixure, 4 mM + Glucose, 16.7 mM	0.704887	0.662035	0.402767	0.523607
99	Amino acid Mixure, 4 mM + Glucose, 16.7 mM	0.383783	0.360231	0.793783	0.687893	1.83012	0.941569	1.05171	0.579159	0.69748	1.97072	1.02205	1.39388	11.3994	0.381679	0.837184	0.295092	0.179598	0.717063	1.86216	1.19107	0.636716	1.13814	1.69053	0.600892	0.785639	0.268694	0.614698	0.454629	1.08782	2.2781	1.81469	0.692118	0.275359	0.801283	0.611352	2.04475	0.332755	1.56627	0.129822	0.346685	0.628297		99	Amino acid Mixure, 4 mM + Glucose, 16.7 mM	0.856968	0.598519	0.39487	0.621227
100	Amino acid Mixure, 4 mM + Glucose, 16.7 mM	0.351217	0.360231	0.773889	0.703409	1.79412	1.13169	1.27461	0.657949	0.78094	2.64576	1.10115	1.6287	9.55189	0.368956	0.837184	0.295941	0.178101	0.737236	1.77836	1.12571	0.619736	1.22398	1.5014	0.729526	0.835381	0.264874	0.641026	0.451011	1.11639	2.27591	2.18019	0.90301	0.251878	0.762511	0.731116	2.01389	0.303819	1.53991	0.115912	0.444079	0.663711		100	Amino acid Mixure, 4 mM + Glucose, 16.7 mM	0.700588	0.657149	0.39487	0.709974
AUC		7.053	5.118	9.523	10.29	27.37	15.85	16.21	11.78	11.45	39.56	19.08	22.19	165.8	6.957	12.93	5.204	3.559	13.73	38.02	18.73	16.5	18.49	29.24	11.1	14.8	4.378	10.06	9.119	20.24	38.09	31.98	12.43	4.822	16.48	13.05	39.65	5.789	26.69	2.723	6.71	11.4			AUC	10.67	8.843	5.929	11.47
Graph S2F
Insulin secretion per beta-cells in 100 islets		N=41																																												n=12
Area under curve in high glucose		ND without Autoantibodies																																												ND with Autoantibodies
Time (min)	Stimulus	HPAP004	HPAP005	HPAP006	HPAP011	HPAP012	HPAP014	HPAP018	HPAP022	HPAP034	HPAP035	HPAP036	HPAP042	HPAP056	HPAP059	HPAP063	HPAP066	HPAP067	HPAP069	HPAP074	HPAP075	HPAP082	HPAP095	HPAP099	HPAP101	HPAP103	HPAP104	HPAP105	HPAP110	HPAP117	HPAP118	HPAP119	HPAP121	HPAP122	HPAP125	HPAP127	HPAP128	HPAP129	HPAP131	HPAP132	HPAP139	HPAP140		Time (min)	Stimulus	HPAP003	HPAP008	HPAP009	HPAP016
81	Amino acid Mixure, 4 mM + Glucose, 16.7 mM	0.888381	1.63352	1.62776	1.00501	0.406726	1.90226	1.34202	0.73619	0.908293	1.44883	0.926755	0.497509	0.403369	0.693566	0.440094	1.0032	0.938691	4.12698	1.2457	0.832695	0.550145	3.09681	2.49082	0.775507	0.985167	0.53692	0.415482	0.281998	2.36233	0.832811	1.44847	0.91405	0.614452	2.33132	1.03718	1.26368	0.646086	4.18949	0.803652	5.86549	2.60655		81	Amino acid Mixure, 4 mM + Glucose, 16.7 mM	0.296891	0.631967	0.456643	1.5475
82	Amino acid Mixure, 4 mM + Glucose, 16.7 mM	1.03458	1.7207	1.68653	1.5758	0.32862	2.04305	1.82852	1.02724	1.60287	2.00778	1.48155	0.510631	0.447883	0.663897	0.389556	1.10552	1.01655	5.01463	1.47382	0.85019	0.734784	4.04194	2.64612	0.745565	1.17153	0.444067	0.458649	0.332793	2.41543	0.92752	1.87709	0.777467	0.617195	1.89491	1.11126	1.16969	0.714564	13.5139	1.33176	5.79501	3.66679		82	Amino acid Mixure, 4 mM + Glucose, 16.7 mM	0.38878	0.698488	0.838734	2.21617
83	Amino acid Mixure, 4 mM + Glucose, 16.7 mM	0.951814	2.27133	1.34156	1.05054	0.485784	2.28108	1.24672	1.50417	1.71736	4.62906	1.74949	1.99011	1.65243	1.39826	1.6214	1.51719	2.03311	6.00891	7.96688	3.85209	0.791302	10.2154	8.18715	2.51516	7.20317	1.8772	1.63675	1.26987	4.2784	3.34612	6.54765	1.75876	0.51433	4.73729	1.69693	2.19317	1.07185	14.2763	2.64057	4.97274	13.1536		83	Amino acid Mixure, 4 mM + Glucose, 16.7 mM	0.447676	0.684234	0.599096	1.64302
84	Amino acid Mixure, 4 mM + Glucose, 16.7 mM	1.50362	1.7207	2.1465	1.26064	0.32862	2.25138	0.980751	4.32909	4.65597	17.8842	4.05061	7.2534	1.41041	4.62872	4.21143	2.3717	4.62856	21.4851	16.3666	16.1221	2.88261	15.7254	20.3096	8.01257	13.7568	8.80063	6.95168	6.62082	8.27414	15.8148	20.1159	7.14009	0.740635	9.56073	10.2266	10.3601	6.08868	32.8602	2.77833	6.81305	42.6371		84	Amino acid Mixure, 4 mM + Glucose, 16.7 mM	0.435906	0.698488	0.678974	2.10155
85	Amino acid Mixure, 4 mM + Glucose, 16.7 mM	2.63476	2.31723	1.57154	1.26064	0.485784	2.34069	1.87839	6.13899	6.06803	22.4017	6.09956	9.08639	9.18017	5.18506	4.21143	4.94964	5.36394	29.9581	20.0769	18.7042	3.14638	12.9704	19.6084	10.4469	9.65062	7.2262	7.14953	7.73305	9.90583	21.4856	22.7025	8.40505	1.3064	9.38846	15.0171	11.0285	9.73594	28.8766	2.43391	16.8368	34.3655		85	Amino acid Mixure, 4 mM + Glucose, 16.7 mM	0.377011	0.655724	0.579127	1.83407
86	Amino acid Mixure, 4 mM + Glucose, 16.7 mM	4.70385	4.79489	1.68653	6.35573	2.85756	3.06468	1.66229	6.22459	5.11393	15.9507	6.90338	6.54639	5.892	4.00562	4.21143	6.26618	4.45553	29.0503	19.6028	15.3139	2.29855	11.3013	15.628	7.81495	7.01758	3.87551	5.17104	6.62958	8.81375	14.4764	18.9039	5.75326	1.80015	6.71835	14.972	8.54292	7.22008	21.2143	2.27318	11.0157	35.5167		86	Amino acid Mixure, 4 mM + Glucose, 16.7 mM	1.0014	1.39698	0.738883	2.44544
87	Amino acid Mixure, 4 mM + Glucose, 16.7 mM	4.7592	5.00148	1.87818	15.1277	8.91557	6.75413	4.25546	6.89719	3.96902	12.623	6.13108	5.61679	3.9892	2.44788	4.21143	6.73381	2.89826	20.6205	14.3466	9.49904	1.80869	9.51163	13.208	5.38064	5.20809	2.62404	3.99294	4.25624	8.01717	10.6019	15.1793	6.37523	1.87216	5.85703	10.0314	8.52204	5.06149	22.6438	1.79099	9.60613	24.4737		87	Amino acid Mixure, 4 mM + Glucose, 16.7 mM	3.3929	3.47819	1.49774	2.48365
88	Amino acid Mixure, 4 mM + Glucose, 16.7 mM	4.53831	4.54292	3.06642	9.55986	7.45822	9.42197	6.34994	8.97613	3.24391	11.4518	6.5724	5.30258	3.52185	2.38112	3.85135	5.9952	2.74686	18.2602	12.0791	8.91125	2.31739	10.2557	10.4488	6.06333	5.18489	2.56348	3.73214	3.75706	5.76877	9.05214	11.5582	5.77427	1.91331	4.90956	8.61979	5.2845	3.75146	19.0795	1.58434	39.1554	18.5258		88	Amino acid Mixure, 4 mM + Glucose, 16.7 mM	5.56061	5.04623	2.45629	3.28606
89	Amino acid Mixure, 4 mM + Glucose, 16.7 mM	3.89021	4.12972	6.17118	6.61836	5.30077	9.47167	6.89849	9.59981	3.39657	10.8569	6.63544	5.45971	3.4217	2.13633	3.65552	5.54676	2.05474	14.8479	9.67774	7.70419	2.12898	10.9193	10.1548	5.49742	5.19649	2.60386	3.74114	3.21408	6.03858	9.59221	13.1544	4.70683	1.38869	5.51249	6.84778	4.99208	3.23042	19.1367	1.67618	39.0576	21.148		89	Amino acid Mixure, 4 mM + Glucose, 16.7 mM	4.93632	4.57582	3.17521	3.47711
90	Amino acid Mixure, 4 mM + Glucose, 16.7 mM	3.09008	4.17563	10.9625	4.41224	4.20061	9.56079	7.03148	11.0673	3.66371	10.6152	5.12237	6.00959	3.75553	2.62591	3.76291	5.05995	2.31428	20.4476	8.05963	7.84064	1.9971	10.9394	10.9011	5.48843	5.69526	3.49199	4.12784	3.03892	6.30839	10.2849	12.0902	5.22794	1.04923	5.42636	6.26211	4.72054	3.30486	24.6833	2.22726	31.5005	16.3513		90	Amino acid Mixure, 4 mM + Glucose, 16.7 mM	4.65367	3.44968	2.27656	3.13322
91	Amino acid Mixure, 4 mM + Glucose, 16.7 mM	3.15894	4.15267	15.3321	4.56982	3.08616	9.17404	6.41643	11.4219	3.74004	11.8422	5.18542	6.19289	4.33972	2.31436	4.18616	4.72902	2.14125	16.6866	8.02871	8.55438	1.54493	11.603	10.9916	4.87761	5.73006	3.37088	4.06489	3.0652	6.07712	10.872	12.6962	4.87493	1.06981	6.28768	6.26211	5.61869	4.19806	21.6146	2.02061	17.0718	15.9889		91	Amino acid Mixure, 4 mM + Glucose, 16.7 mM	3.51084	3.25011	1.67747	3.01858
92	Amino acid Mixure, 4 mM + Glucose, 16.7 mM	2.97963	4.31328	15.9837	5.72541	2.77183	6.58542	4.92037	8.47474	3.24391	9.16516	5.61097	5.57754	3.02111	1.98056	3.12277	5.78177	2.20614	14.0928	8.36883	10.0658	1.54493	11.4622	12.5069	6.17112	5.99684	3.7544	4.10086	3.10023	5.37048	10.6606	14.7064	5.06404	1.19325	6.02928	5.91672	5.01296	3.43884	18.298	1.83692	18.9121	18.0142		92	Amino acid Mixure, 4 mM + Glucose, 16.7 mM	3.29885	2.86523	1.53768	2.67463
93	Amino acid Mixure, 4 mM + Glucose, 16.7 mM	2.99341	4.72617	16.942	6.19815	3.41478	5.6632	5.43568	9.26963	3.74004	11.7864	5.45335	6.33693	3.77222	2.06957	3.83871	5.1271	2.66034	15.724	8.56465	10.4227	2.54348	11.9851	12.9366	6.15315	5.90405	3.65347	4.40663	3.01265	6.2313	10.9541	14.9428	5.6524	1.09038	5.59863	5.79659	4.90853	3.23042	21.2715	2.43391	27.4284	18.6324		93	Amino acid Mixure, 4 mM + Glucose, 16.7 mM	3.77011	3.15033	1.69744	2.40723
94	Amino acid Mixure, 4 mM + Glucose, 16.7 mM	3.44869	4.35914	17.0953	6.14562	3.55766	7.41852	5.40244	10.1379	4.35066	13.0692		6.8999	4.33972	2.40337	3.71658	5.31415	2.2494	17.4215	9.07997	9.46755	3.2971	12.6688	11.6927	6.10824	6.06644	3.81495	4.21777	2.92507	4.97219	10.872	12.5337	6.08946	1.44012	5.85703	7.59863	5.07563	3.17088	20.7759	3.00795	25.686	18.6751		94	Amino acid Mixure, 4 mM + Glucose, 16.7 mM	3.55787	2.908	1.79729	2.7129
95	Amino acid Mixure, 4 mM + Glucose, 16.7 mM	3.25561	4.42795	15.9454	5.67288	4.04344	7.79537	5.31932	8.78046	3.96902	13.9987	5.42183	7.2534	3.67207	2.44788	3.38599	5.23501	2.48731	14.9574	9.16242	9.61449	1.78985	13.1715	11.9641	6.09027	6.03164	3.6131	4.27173	3.04768	5.79446	10.4845	12.7997	6.63579	1.12124	6.71835	7.1331	5.57692	3.34952	21.8433	3.03091	32.9101	18.7817		95	Amino acid Mixure, 4 mM + Glucose, 16.7 mM	3.7935	2.93651	1.59759	2.59828
96	Amino acid Mixure, 4 mM + Glucose, 16.7 mM	2.86919	5.7358	16.0987	5.5153	3.54337	8.8665	5.18634	9.75879	4.80862	13.9429	4.42888	8.10445	3.55523	2.95971	3.76502	4.77938	2.57383	17.2918	7.55462	11.5773	2.6	12.1861	10.7428	6.30586	5.71846	3.55255	4.09187	3.07395	7.43901	11.4942	16.7756	5.67761	1.1521	5.16796	7.29829	4.99208	3.4835	22.1482	2.25022	20.7132	19.208		96	Amino acid Mixure, 4 mM + Glucose, 16.7 mM	4.30009	3.17884	1.8572	3.05679
97	Amino acid Mixure, 4 mM + Glucose, 16.7 mM	2.86919	5.16227	15.9071	6.19815	3.87199	8.8865	5.26945	8.53588	4.08351	15.6161	5.13813	8.85072	3.73883	2.67042	2.85114	4.75539	2.61708	17.2054	8.25546	10.6116	1.52609	12.347	12.7104	6.59331	6.10123	3.73421	4.17281	3.11774	5.82016	12.4452	13.3318	5.80369	1.49155	5.68476	7.17815	5.32627	4.7191	23.6159	1.99765	34.0848	23.1306		97	Amino acid Mixure, 4 mM + Glucose, 16.7 mM	4.60639	3.03629	1.71741	3.05679
98	Amino acid Mixure, 4 mM + Glucose, 16.7 mM	3.15894	5.59792	16.0987	6.14562	3.82912	7.43833	6.15046	7.45972	4.50331	12.1768	5.3115	7.51528	3.63869	2.04732	3.51865	4.90407	2.63871	16.8595	8.52342	12.207	1.3	13.2921	12.4164	6.54839	5.64886	3.77458	5.16205	2.95135	6.01288	12.2221	14.4846	5.58516	1.23439	5.42636	7.71877	5.1174	4.85904	21.8623	1.95172	28.329	21.0201		98	Amino acid Mixure, 4 mM + Glucose, 16.7 mM	3.87611	3.86307	2.03693	2.25439
99	Amino acid Mixure, 4 mM + Glucose, 16.7 mM	3.09008	5.5063	15.2938	6.98605	4.35777	7.22029	5.56867	6.92165	4.46515	11.4518	5.09085	7.30578	4.84045	2.67042	4.21143	5	2.59546	16.9028	9.38916	12.0496	1.41304	13.3324	13.1401	6.00045	6.22883	4.25902	4.8293	3.30166	6.35978	12.2221	14.6768	5.62718	1.32697	5.34023	6.59249	5.53515	4.45114	23.7874	1.92876	21.046	21.9368		99	Amino acid Mixure, 4 mM + Glucose, 16.7 mM	4.71239	3.49245	1.99698	2.67469
100	Amino acid Mixure, 4 mM + Glucose, 16.7 mM	2.82787	5.5063	14.9105	7.14363	4.27205	8.67817	6.74889	7.86328	4.99944	15.3744	5.48488	8.5365	4.05597	2.5814	4.21143	5.01439	2.57383	17.3783	8.9666	11.3883	1.37536	14.3378	11.6701	7.28497	6.6232	4.19846	5.03614	3.27538	6.5268	12.2104	17.6328	7.34181	1.21382	5.08183	7.88396	5.4516	4.06408	23.3872	1.72211	26.9585	23.1733		100	Amino acid Mixure, 4 mM + Glucose, 16.7 mM	3.85247	3.83456	1.99698	3.05679
	AUC	56.79	78.23	183.5	104.5	65.18	121.5	85.85	140.8	73.29	229.9	95.03	116.3	70.42	48.67	65.05	88.18	51.44	323.6	191.7	189.5	36.63	216.6	227.3	110.8	117.3	69.4	79.01	66.23	118.3	204.3	258.6	101.1	23.24	109.8	140.7	107.3	77.43	405.3	40.46	407.3	398.1			AUC	58.7	51.6	29.98	49.38
Graph S2G
									Area Under Curve 16.7mM
n=39		Age (Years)	BMI (Kg/m2)	Gender			n=39		Insulin sec/100islets		% Beta-cell	DNA content (ng/ 100 islets)	ng beta-cell DNA in 100 islets
ND without Autoantibodies	HPAP004	24	32.2	Female			ND without Autoantibodies	HPAP004	21.44		37.7563	561.6	212.04
	HPAP005	14	24.1	Female				HPAP005	17.76		22.7013	443.733	100.733
	HPAP006	46	19.1	Male				HPAP006	24.93		13.588	409.067	55.5841
	HPAP011	3	17.6	Male				HPAP011	10.36		9.91559	422.933	41.9364
	HPAP012	18	29.6	Female				HPAP012	23.76		36.4531	416	151.645
	HPAP014	43	30.93	Female				HPAP014	63.82		52.5145	651.733	342.255
	HPAP018	31	24.47	Male				HPAP018	26.9		31.3323	762.667	238.961
	HPAP022	39	34.7	Female				HPAP022	59.98		42.5898	426.4	181.603
	HPAP034	13	18.6	Male				HPAP034	12.52		17.0889	161.2	27.5473
	HPAP035	35	26.91	Male				HPAP035	64.4		31.8441	663	211.127
	HPAP036	23	16	Female				HPAP036	31.4		34.521	626.6	216.309
	HPAP059	35	37.96	Male				HPAP059	9.114		18.7237	414.267	77.5659
	HPAP063	45	38.41	Female				HPAP063	21.45		32.9791	165.533	54.5913
	HPAP066	58	31.07	Female				HPAP066	19.15		21.7188	814.667	176.935
	HPAP067	26	34.97	Male				HPAP067	12.39		24.0805	862.333	207.655
	HPAP069	47	24.86	Female				HPAP069	38.99		12.0481	95.3333	11.4858
	HPAP074	40	36.88	Female				HPAP074	96.87		50.5348	123.2	62.2588
	HPAP075	35	27.52	Male				HPAP075	94.02		49.6213	509.333	252.738
	HPAP082	25	23.96	Male				HPAP082	6.75		18.4295	312	57.5
	HPAP095	23	34.32	Female				HPAP095	56.11		25.9003	1045.33	270.745
	HPAP099	28	24.7	Female				HPAP099	52.34		23.029	386.667	89.0454
	HPAP101	55	38.01	Female				HPAP101	64.27		57.9818	669.333	388.091
	HPAP103	48	36.44	Female				HPAP103	52.68		44.9021	685.333	307.729
	HPAP104	4	20.63	Male				HPAP104	17.91		25.8031	405.333	104.589
	HPAP105	51	28.1	Female				HPAP105	45.76		57.9147	608	352.121
	HPAP110	31	36.29	Male				HPAP110	39.39		59.4714	177.6	105.621
	HPAP117	64	32.39	Male				HPAP117	47.97		40.538	354.667	143.775
	HPAP118	51	33.01	Female				HPAP118	90.64		44.3611	594.667	263.801
	HPAP119	48	29.45	Female				HPAP119	91.13		35.2385	469.333	165.386
	HPAP121	42	28.85	Male				HPAP121	66.8		66.0978	554.667	366.623
	HPAP122	21	30.05	Female				HPAP122	11.76		50.6323	376	190.377
	HPAP125	38	24.17	Male				HPAP125	6.641		6.04687	173.333	10.4812
	HPAP127	53	31	Male				HPAP127	48.81		34.6828	216.267	75.0073
	HPAP128	49	30.12	Male				HPAP128	28.55		26.5977	464.533	123.555
	HPAP129	19	18.01	Female				HPAP129	27.09		34.9864	97.6	34.1467
	HPAP131	23	22.5	Male				HPAP131	110.7		27.3253	50.9333	13.9177
	HPAP132	5	15.71	Female				HPAP132	9.177		22.6829	717.333	162.712
	HPAP139	22	26.52	Male				HPAP139	108.4		26.6034	1261	335.469
	HPAP140	29	31.71	Female				HPAP140	97.26		24.431	345.333	84.3683
									Area Under Curve 16.7mM
n=12		Age (Years)	BMI (Kg/m2)	Gender			n=12		Insulin sec/100islets		% Beta-cell	DNA content (ng/ 100 islets)	ng beta-cell DNA in 100 islets
ND with Autoantibodies	HPAP003	29	24.5	Male			ND with Autoantibodies	HPAP003	23.59		40.1898	412.533	165.796
	HPAP008	24	31.9	Female				HPAP008	18.85		36.5372	547.733	200.126
	HPAP009	3	14.9	Male				HPAP009	7.82		26.081	433.333	113.018
	HPAP016	30	25.21	Male				HPAP016	3.59		7.26978	261.04	18.977
	HPAP017	30	23.7	Male				HPAP017	33.16		36.68	679.467	249.229
	HPAP019	22	29.8	Male				HPAP019	62.29		41.3803	578.933	239.564
	HPAP024	18	24.3	Male				HPAP024	6.603		29.9957	300.3	90.0771
	HPAP029	23	28.6	Male				HPAP029	34.23		35.0707	1352	474.156
	HPAP060	30	26.2	Male				HPAP060	5.609		5.90727	428.133	25.291
	HPAP092	21	25.59	Male				HPAP092	5.53		3.7146	762.667	28.33
	HPAP107	15	23.59	Male				HPAP107	32.78		22.8823	992	226.992
	HPAP148	7	14.9	Male				HPAP148	38.49		30.376	2420	735.099
									Area Under Curve 16.7mM
n=25		Age (Years)	BMI (Kg/m2)	Gender	Duration of disease (Years)		n=25		Insulin sec/100islets		% Beta-cell	DNA content (ng/ 100 islets)	ng beta-cell DNA in 100 islets
T2D	HPAP001	47	32.2	Male	20		T2D	HPAP001	11.38		17.0932	811.2	138.66
	HPAP010	42	36.8	Female	2			HPAP010	27.61		35.4272	610.133	216.153
	HPAP013	28	41.6	Female	5			HPAP013	29.78		44.3492	821.6	364.373
	HPAP061	59	38.27	Female	Unknown			HPAP061	22.68		18.2197	700.267	127.586
	HPAP062	56	26.48	Male	4_5			HPAP062	12.63		12.7772	1560	199.324
	HPAP065	40	37.47	Male	3			HPAP065	13.21		11.7197	596.267	69.8808
	HPAP070	55	17.09	Male	16			HPAP070	6.25		6.35232	2903.33	184.429
	HPAP079	52	28.38	Female	10			HPAP079	13.44		32.5006	600	195.004
	HPAP081	45	28.91	Female	20			HPAP081	14.92		29.9787	166.933	50.0444
	HPAP083	45	35.62	Male	2-3 years			HPAP083	15.5		12.1286	216.267	26.2302
	HPAP085	48	39.78	Female	6-10 years			HPAP085	40.55		54.0156	157.6	85.1286
	HPAP088	37	32.81	Male	10 days			HPAP088	18.23		15.9505	501.333	79.965
	HPAP090	59	32.23	Female	4			HPAP090	50.31		50.6454	746.667	378.152
	HPAP091	50	35.58	Female	3 months			HPAP091	24.42		23.3334	250.933	58.5513
	HPAP096	56	38.7	Female	1			HPAP096	21.16		41.2168	400	164.867
	HPAP100	41	28.83	Male	7-8 years			HPAP100	5.786		7.54884	666.667	50.3256
	HPAP106	55	28.12	Male	3 years			HPAP106	46.9		27.2006	738.667	200.922
	HPAP108	42	33	Male	NA			HPAP108	4.539		10.3961	1045.33	108.674
	HPAP109	59	29.49	Female	<5 years			HPAP109	18.83		34.7939	770.667	268.145
	HPAP115	46	28.72	Male	5-6 years			HPAP115	13.22		13.787	517.333	71.3247
	HPAP120	63	29.6	Female	2-3 years			HPAP120	14.9		29.4797	760	224.046
	HPAP124	47	30.96	Male	10 years			HPAP124	53.46		61.1351	349.333	213.565
	HPAP126	50	31.01	Female	1 month			HPAP126	35.38		48.7571	888	432.963
	HPAP133	49	25.42	Female	NA			HPAP133	38.3		33.066	442.667	146.372
	HPAP142	43	23.48	Male	0-5 years			HPAP142	9.965		23.8146	171.6	40.8659
									Area Under Curve 16.7mM
n=9		Age (Years)	BMI (Kg/m2)	Gender	Duration of disease (Years)		n=9		Insulin sec/100islets		% Beta-cell	DNA content (ng/ 100 islets)	ng beta-cell DNA in 100 islets
T1D	HPAP002	26	16.4	Male	5		T1D	HPAP002	0.8337		0.98659	196.213	1.93582
	HPAP015	29	22.03	Male	7			HPAP015	0.2359		0.385159	592.8	2.28322
	HPAP020	14	13.2	Male				HPAP020	1.298		3.73076	405.6	15.132
	HPAP071	12	15.42	Female	3			HPAP071	1.296		2.7576	472	13.0159
	HPAP084	12	18.5	Female	NA			HPAP084	4.506		33.7886	656	221.653
	HPAP102	18	20.65	Male	6 years			HPAP102	1.013		0.820858	185.333	1.52132
	HPAP113	9	15.92	Male	recent DKA			HPAP113	9.714		18.9678	1176	223.061
	HPAP123	25	21.35	Male	3 years			HPAP123	2.906		9.45468	328	31.0114
	HPAP138	35	23.63	Female	8 years			HPAP138	18.51		17.925	180.7	32.3904
[truncated: 46 more columns]

## Sheet: Figure 4
Graph 4A
ND	n=24	Age (years)	Sex	BMI (Kg/m2)					n=24	% Beta- cell DNA	% Insulin+ staining
	6019-01_panTail	42	Male	31				Non-Diabetic	6019-01_panTail	4.39913	1.22277
	6134-01_panTail	26.7	Male	20.1				Non-Diabetic	6134-01_panTail	2.05943	0.591935
	6160-01_panTail	22.1	Male	23.9				Non-Diabetic	6160-01_panTail	1.32411	0.392885
	6389-01-panTail	18.6	Male	20.93				Non-Diabetic	6389-01-panTail	1.67223	0.475557
	6420-01_panTail	11.5	Male	15.4				Non-Diabetic	6420-01_panTail	1.5995	0.557945
	6365-01_panTail	13	Male	35.8				Non-Diabetic	6365-01_panTail	0.991303	0.837352
	6131-01_panTail	24.2	Male	24.8				Non-Diabetic	6131-01_panTail	2.10899	0.628857
	6017-01_panTail	59	Female	24.8				Non-Diabetic	6017-01_panTail	3.90115	1.2332
	6057-01_panTail	22	Male	26				Non-Diabetic	6057-01_panTail	1.87571	0.610495
	6162-01_panTail	22.7	Male	28.9				Non-Diabetic	6162-01_panTail	1.8268	0.444146
	6229-01_panTail	31	Female	26.9				Non-Diabetic	6229-01_panTail	2.05136	1.27856
	6290-01_panTail	58	Male	22.51				Non-Diabetic	6290-01_panTail	3.46932	0.86054
	6412-01A_panTail	17.58	Female	24				Non-Diabetic	6412-01A_panTail	1.61697	1.06346
	6425-01A_panTail	38.66	Female	28.3				Non-Diabetic	6425-01A_panTail	1.50046	0.774482
	6431-01A-panTail	13.8	Male	23.1				Non-Diabetic	6431-01A-panTail	1.68885	0.931706
	6439-01_panTail	27	Male	29.1				Non-Diabetic	6439-01_panTail	1.50382	0.624562
	6445-01_panTail	17.25	Male	20.6				Non-Diabetic	6445-01_panTail	1.6897	1.12647
	6227-02_panTail	17	Female	26.4				Non-Diabetic	6227-02_panTail	2.9512	0.775865
	6462-01A_panTail	13.52	Female	15.2				Non-Diabetic	6462-01A_panTail	2.60118	0.518554
	6482-01A_panTail	18.69	Female	20				Non-Diabetic	6482-01A_panTail	2.63368	0.615291
	6501-01A-panTail	12.85	Male	15.8				Non-Diabetic	6501-01A-panTail	1.9938	0.945148
	6509-06A_panOther	18.72	Male	25.8				Non-Diabetic	6509-06A_panOther	1.04558	0.269131
	6493-01A_panTail	18.84	Male	17.7				Non-Diabetic	6493-01A_panTail	2.68128	1.29276
	6234-02_panHead	20	Female	25.6				Non-Diabetic	6234-02_panHead	1.54557	0.463057
	n=15	Age (years)	Sex	BMI (Kg/m2)	Duration of disease (Years)				n=15	% Beta- cell DNA	% Insulin+ staining
	6259-01A-panTail	57	Male	32.3	10			T2D	6259-01A-panTail	0.605743	0.507975
	6499-04A_panOther	18.6	Male	36.6	3			T2D	6499-04A_panOther	1.78889	0.575517
	6252-01_panTail	20	Male	37.8				T2D	6252-01_panTail	1.80033	0.590207
	6255-01_panTail	55	Male	29.4	6			T2D	6255-01_panTail	1.33008	0.435466
	6280-01_panTail	47	Male	28.1	10			T2D	6280-01_panTail	0.75588	0.239948
	6028-01_panTail	33.2	Male	30.2	17			T2D	6028-01_panTail	0.32023	0.196612
	6114-01-panTail	42.8	Male	31	2			T2D	6114-01-panTail	2.0892	0.861735
	6149-01_panTail	39.3	Female	29.1	16			T2D	6149-01_panTail	2.13601	0.617628
	6189-01_panTail	48.5	Female	36.1	26			T2D	6189-01_panTail	2.07258	0.640233
	6194-01_panTail	47.4	Male	29.5	13			T2D	6194-01_panTail	3.00603	1.50078
	6272-01_panTail	57	Female	29.6	10			T2D	6272-01_panTail	1.56034	0.826586
	6277-01_panTail	48	Male	29.5	10			T2D	6277-01_panTail	0.843909	0.591076
	6283-01-panTail	56	Female	28.1	17			T2D	6283-01-panTail	6.16387	0.912734
	6308-01_panTail	13	Female	34.1	1			T2D	6308-01_panTail	2.01816	0.721826
	6199-04_panTail	53	Male	29.6	20			T2D	6199-04_panTail	1.71189	0.454471
	n=18	Age (years)	Sex	BMI (Kg/m2)	Duration of disease (Years)				n=18	% Beta- cell DNA	% Insulin+ staining
	5000-01_panTail	18.76	Female	25.03	2			T1D	5000-01_panTail	0.714763	0.20369
	6039-01_panTail	28.7	Female	23.4	12			T1D	6039-01_panTail	0.254376	0.0467204
	6070-01_panTail	22.6	Female	21.6	7			T1D	6070-01_panTail	0.356919	0.144978
	6228-01_panTail	13	Male	17.36	0			T1D	6228-01_panTail	1.09386	0.169375
	6265-01_panTail	11	Male	12.85	8			T1D	6265-01_panTail	0.084804	0
	6438-01_panTail	39.01	Female	35	10			T1D	6438-01_panTail	0.213192	0
	6341-01_panTail	26	Male	21.8	15			T1D	6341-01_panTail	0.342097	0
	6371-04_panTail	12.5	Female	16.6	2			T1D	6371-04_panTail	0.0993282	0.0435929
	6414-02_panTail	23.1	Male	28.4	0.43			T1D	6414-02_panTail	1.90388	0.288834
	6456-01A_panTail	30.49	Female	30.1	0			T1D	6456-01A_panTail	1.70169	0.621697
	6484-02A_panOther	28	Male	24.9	10			T1D	6484-02A_panOther	0.158025	0.0250627
	6342-01_panHead	14	Female	24.3	2			T1D	6342-01_panHead	0.0626409	0.00991474
	6520-01A_panTail	21.61	Male	29.3	0			T1D	6520-01A_panTail	1.716	0.603933
	6399-03B_panOther	17	Male	32	0			T1D	6399-03B_panOther	0.468251	0.249063
	6380-01-panTail	11.6	Female	14.6	0			T1D	6380-01-panTail	0.284624	0.193377
	6325-01_panTail	20	Female	31.2	6			T1D	6325-01_panTail	0.970438	0.139594
	6268-01_panTail	12	Female	26.6	3			T1D	6268-01_panTail	0.420194	0.0625313
	6195-06_panBody	19.3	Male	23.7	5			T1D	6195-06_panBody	0.145187	0
Graph 4B
ND	n=24	Age (years)	Sex	BMI (Kg/m2)					n=24	% Alpha-cell DNA	% Glucagon+ staining
	6019-01_panTail	42	Male	31				Non-Diabetic	6019-01_panTail	3.59772	0.915238
	6134-01_panTail	26.7	Male	20.1				Non-Diabetic	6134-01_panTail	1.97313	0.363816
	6160-01_panTail	22.1	Male	23.9				Non-Diabetic	6160-01_panTail	2.05304	0.264402
	6389-01-panTail	18.6	Male	20.93				Non-Diabetic	6389-01-panTail	0.720541	0.298736
	6420-01_panTail	11.5	Male	15.4				Non-Diabetic	6420-01_panTail	0.766319	0.207554
	6365-01_panTail	13	Male	35.8				Non-Diabetic	6365-01_panTail	0.928272	0.120949
	6131-01_panTail	24.2	Male	24.8				Non-Diabetic	6131-01_panTail	2.38711	0.152342
	6017-01_panTail	59	Female	24.8				Non-Diabetic	6017-01_panTail	1.47375	0.530289
	6057-01_panTail	22	Male	26				Non-Diabetic	6057-01_panTail	1.29354	0.392208
	6162-01_panTail	22.7	Male	28.9				Non-Diabetic	6162-01_panTail	0.530257	0.273121
	6229-01_panTail	31	Female	26.9				Non-Diabetic	6229-01_panTail	0.73325	0.4781
	6290-01_panTail	58	Male	22.51				Non-Diabetic	6290-01_panTail	0.891565	0.412611
	6412-01A_panTail	17.58	Female	24				Non-Diabetic	6412-01A_panTail	1.38575	0.319416
	6425-01A_panTail	38.66	Female	28.3				Non-Diabetic	6425-01A_panTail	1.19599	0.221932
	6431-01A-panTail	13.8	Male	23.1				Non-Diabetic	6431-01A-panTail	0.756697	0.401181
	6439-01_panTail	27	Male	29.1				Non-Diabetic	6439-01_panTail	1.27363	0.400759
	6445-01_panTail	17.25	Male	20.6				Non-Diabetic	6445-01_panTail	2.07677	0.332756
	6227-02_panTail	17	Female	26.4				Non-Diabetic	6227-02_panTail	1.00625	0.201146
	6462-01A_panTail	13.52	Female	15.2				Non-Diabetic	6462-01A_panTail	0.475029	0.188816
	6482-01A_panTail	18.69	Female	20				Non-Diabetic	6482-01A_panTail	0.867514	0.159704
	6501-01A-panTail	12.85	Male	15.8				Non-Diabetic	6501-01A-panTail	0.456504	0.373296
	6509-06A_panOther	18.72	Male	25.8				Non-Diabetic	6509-06A_panOther	0.553226	0.150525
	6493-01A_panTail	18.84	Male	17.7				Non-Diabetic	6493-01A_panTail	1.32588	0.544817
	6234-02_panHead	20	Female	25.6				Non-Diabetic	6234-02_panHead	0.0932513	0.306372
	n=15	Age (years)	Sex	BMI (Kg/m2)	Duration of disease (Years)				n=15	% Alpha-cell DNA	% Glucagon+ staining
	6259-01A-panTail	57	Male	32.3	10			T2D	6259-01A-panTail	1.13514	0.389279
	6499-04A_panOther	18.6	Male	36.6	3			T2D	6499-04A_panOther	1.40367	0.314189
	6252-01_panTail	20	Male	37.8				T2D	6252-01_panTail	1.07824	0.32409
	6255-01_panTail	55	Male	29.4	6			T2D	6255-01_panTail	0.968462	0.529006
	6280-01_panTail	47	Male	28.1	10			T2D	6280-01_panTail	1.25761	0.0981065
	6028-01_panTail	33.2	Male	30.2	17			T2D	6028-01_panTail	0.524717	0.20695
	6114-01-panTail	42.8	Male	31	2			T2D	6114-01-panTail	1.77039	0.624568
	6149-01_panTail	39.3	Female	29.1	16			T2D	6149-01_panTail	2.76734	0.621208
	6189-01_panTail	48.5	Female	36.1	26			T2D	6189-01_panTail	2.37537	0.650564
	6194-01_panTail	47.4	Male	29.5	13			T2D	6194-01_panTail	3.0026	0.754756
	6272-01_panTail	57	Female	29.6	10			T2D	6272-01_panTail	4.27024	1.74403
	6277-01_panTail	48	Male	29.5	10			T2D	6277-01_panTail	0.745372	0.332564
	6283-01-panTail	56	Female	28.1	17			T2D	6283-01-panTail	2.78959	0.571644
	6308-01_panTail	13	Female	34.1	1			T2D	6308-01_panTail	0.818045	0.331947
	6199-04_panTail	53	Male	29.6	20			T2D	6199-04_panTail	3.14334	0.641886
	n=18	Age (years)	Sex	BMI (Kg/m2)	Duration of disease (Years)				n=18	% Alpha-cell DNA	% Glucagon+ staining
	5000-01_panTail	18.76	Female	25.03	2			T1D	5000-01_panTail	2.10998	0.658191
	6039-01_panTail	28.7	Female	23.4	12			T1D	6039-01_panTail	2.78333	0.178045
	6070-01_panTail	22.6	Female	21.6	7			T1D	6070-01_panTail	2.35508	0.624063
	6228-01_panTail	13	Male	17.36	0			T1D	6228-01_panTail	1.77595	0.432718
	6265-01_panTail	11	Male	12.85	8			T1D	6265-01_panTail	1.40605	0.277151
	6438-01_panTail	39.01	Female	35	10			T1D	6438-01_panTail	2.54949	0.490247
	6341-01_panTail	26	Male	21.8	15			T1D	6341-01_panTail	2.01149	0.751617
	6371-04_panTail	12.5	Female	16.6	2			T1D	6371-04_panTail	0.397078	0.119344
	6414-02_panTail	23.1	Male	28.4	0.43			T1D	6414-02_panTail	2.12079	0.636242
	6456-01A_panTail	30.49	Female	30.1	0			T1D	6456-01A_panTail	2.16816	0.598974
	6484-02A_panOther	28	Male	24.9	10			T1D	6484-02A_panOther	6.30763	3.55325
	6342-01_panHead	14	Female	24.3	2			T1D	6342-01_panHead	0.651969	0.247288
	6520-01A_panTail	21.61	Male	29.3	0			T1D	6520-01A_panTail	1.46672	0.545613
	6399-03B_panOther	17	Male	32	0			T1D	6399-03B_panOther	1.0832	0
	6380-01-panTail	11.6	Female	14.6	0			T1D	6380-01-panTail	0.572332	0.197322
	6325-01_panTail	20	Female	31.2	6			T1D	6325-01_panTail	1.6814	0.50537
	6268-01_panTail	12	Female	26.6	3			T1D	6268-01_panTail	1.18284	0.655909
	6195-06_panBody	19.3	Male	23.7	5			T1D	6195-06_panBody	1.69425	0.584181
Graph 4C
	Non-Diabetic
n=20	Age (years)	Sex	BMI (Kg/m2)				n=20	Pancreas weight (g)
6134-01_panTail	26.7	Male	20.1			Non-Diabetic	6134-01_panTail	82.42
6160-01_panTail	22.1	Male	23.9			Non-Diabetic	6160-01_panTail	79.4
6389-01-panTail	18.6	Male	20.93			Non-Diabetic	6389-01-panTail	65.85
6420-01_panTail	11.5	Male	15.4			Non-Diabetic	6420-01_panTail	38.83
6365-01_panTail	13	Male	35.8			Non-Diabetic	6365-01_panTail	77.93
6131-01_panTail	24.2	Male	24.8			Non-Diabetic	6131-01_panTail	108.92
6057-01_panTail	22	Male	26			Non-Diabetic	6057-01_panTail	104.36
6162-01_panTail	22.7	Male	28.9			Non-Diabetic	6162-01_panTail	81.5
6229-01_panTail	31	Female	26.9			Non-Diabetic	6229-01_panTail	45.6
6290-01_panTail	58	Male	22.51			Non-Diabetic	6290-01_panTail	85.84
6412-01A_panTail	17.58	Female	24			Non-Diabetic	6412-01A_panTail	80.78
6431-01A-panTail	13.8	Male	23.1			Non-Diabetic	6431-01A-panTail	68.97
6439-01_panTail	27	Male	29.1			Non-Diabetic	6439-01_panTail	72.68
6445-01_panTail	17.25	Male	20.6			Non-Diabetic	6445-01_panTail	64.09
6227-02_panTail	17	Female	26.4			Non-Diabetic	6227-02_panTail	60.4
6462-01A_panTail	13.52	Female	15.2			Non-Diabetic	6462-01A_panTail	59.29
6482-01A_panTail	18.69	Female	20			Non-Diabetic	6482-01A_panTail	57.64
6501-01A-panTail	12.85	Male	15.8			Non-Diabetic	6501-01A-panTail	52.26
6493-01A_panTail	18.84	Male	17.7			Non-Diabetic	6493-01A_panTail	53.77
6234-02_panHead	20	Female	25.6			Non-Diabetic	6234-02_panHead	49.86
	T2D
n=14	Age (years)	Sex	BMI (Kg/m2)	Duration of disease (Years)			n=14	Pancreas weight (g)
6259-01A-panTail	57	Male	32.3	10		T2D	6259-01A-panTail	189.6
6252-01_panTail	20	Male	37.8			T2D	6252-01_panTail	79.33
6255-01_panTail	55	Male	29.4	6		T2D	6255-01_panTail	104.16
6280-01_panTail	47	Male	28.1	10		T2D	6280-01_panTail	58.86
6028-01_panTail	33.2	Male	30.2	17		T2D	6028-01_panTail	48.5
6114-01-panTail	42.8	Male	31	2		T2D	6114-01-panTail	100
6149-01_panTail	39.3	Female	29.1	16		T2D	6149-01_panTail	66.2
6189-01_panTail	48.5	Female	36.1	26		T2D	6189-01_panTail	133.7
6194-01_panTail	47.4	Male	29.5	13		T2D	6194-01_panTail	57.1
6272-01_panTail	57	Female	29.6	10		T2D	6272-01_panTail	72.29
6277-01_panTail	48	Male	29.5	10		T2D	6277-01_panTail	74.44
6283-01-panTail	56	Female	28.1	17		T2D	6283-01-panTail	111.48
6308-01_panTail	13	Female	34.1	1		T2D	6308-01_panTail	71.19
6199-04_panTail	53	Male	29.6	20		T2D	6199-04_panTail	114.1
	T1D
n=16	Age (years)	Sex	BMI (Kg/m2)	Duration of disease (Years)			n=16	Pancreas weight (g)
5000-01_panTail	18.76	Female	25.03	2		T1D	5000-01_panTail	39
6039-01_panTail	28.7	Female	23.4	12		T1D	6039-01_panTail	42.2
6070-01_panTail	22.6	Female	21.6	7		T1D	6070-01_panTail	41.6
6228-01_panTail	13	Male	17.36	0		T1D	6228-01_panTail	30.35
6265-01_panTail	11	Male	12.85	8		T1D	6265-01_panTail	18.48
6438-01_panTail	39.01	Female	35	10		T1D	6438-01_panTail	39.93
6341-01_panTail	26	Male	21.8	15		T1D	6341-01_panTail	26.41
6371-04_panTail	12.5	Female	16.6	2		T1D	6371-04_panTail	22.76
6414-02_panTail	23.1	Male	28.4	0.43		T1D	6414-02_panTail	98.5
6456-01A_panTail	30.49	Female	30.1	0		T1D	6456-01A_panTail	84.97
6342-01_panHead	14	Female	24.3	2		T1D	6342-01_panHead	34
6520-01A_panTail	21.61	Male	29.3	0		T1D	6520-01A_panTail	51.78
6380-01-panTail	11.6	Female	14.6	0		T1D	6380-01-panTail	34.26
6325-01_panTail	20	Female	31.2	6		T1D	6325-01_panTail	41.03
6268-01_panTail	12	Female	26.6	3		T1D	6268-01_panTail	41.1
6195-06_panBody	19.3	Male	23.7	5		T1D	6195-06_panBody	29.8
Graph 4D
													% Beta- cell DNA Final
ND	n=24	Age (years)	Sex	BMI (Kg/m2)					n=24	Insulin	FBXL19	DLG5	Average	SD
	6019-01_panTail	42	Male	31				Non-Diabetic	6019-01_panTail	8.1134	3.27795	1.80606	4.39913	3.29976
	6134-01_panTail	26.7	Male	20.1				Non-Diabetic	6134-01_panTail	3.55624	2.27656	0.345496	2.05943	1.61635
	6160-01_panTail	22.1	Male	23.9				Non-Diabetic	6160-01_panTail	1.66386	0.592998	1.71548	1.32411	0.633687
	6389-01-panTail	18.6	Male	20.93				Non-Diabetic	6389-01-panTail	2.35048	2.39996	0.266244	1.67223	1.21787
	6420-01_panTail	11.5	Male	15.4				Non-Diabetic	6420-01_panTail	1.8313	0.992461	1.97475	1.5995	0.530584
	6365-01_panTail	13	Male	35.8				Non-Diabetic	6365-01_panTail	1.15361	0.450492	1.36981	0.991303	0.48067
	6131-01_panTail	24.2	Male	24.8				Non-Diabetic	6131-01_panTail	1.99092	2.56	1.77604	2.10899	0.405093
	6017-01_panTail	59	Female	24.8				Non-Diabetic	6017-01_panTail	3.86672	5.01398	2.82273	3.90115	1.09603
	6057-01_panTail	22	Male	26				Non-Diabetic	6057-01_panTail	1.76942	2.45962	1.39809	1.87571	0.538687
	6162-01_panTail	22.7	Male	28.9				Non-Diabetic	6162-01_panTail	0.907406	2.02253	2.55045	1.8268	0.838828
	6229-01_panTail	31	Female	26.9				Non-Diabetic	6229-01_panTail	1.7435	2.70193	1.70866	2.05136	0.563679
	6290-01_panTail	58	Male	22.51				Non-Diabetic	6290-01_panTail	3.10959	4.29114	3.00723	3.46932	0.713552
	6412-01A_panTail	17.58	Female	24				Non-Diabetic	6412-01A_panTail	1.57475	2.19342	1.08274	1.61697	0.556539
	6425-01A_panTail	38.66	Female	28.3				Non-Diabetic	6425-01A_panTail	1.16793	1.65276	1.68068	1.50046	0.288316
	6431-01A-panTail	13.8	Male	23.1				Non-Diabetic	6431-01A-panTail	1.7312	2.2283	1.10706	1.68885	0.561818
	6439-01_panTail	27	Male	29.1				Non-Diabetic	6439-01_panTail	1.40764	1.8782	1.22563	1.50382	0.33675
	6445-01_panTail	17.25	Male	20.6				Non-Diabetic	6445-01_panTail	0.61225	3.34925	1.10761	1.6897	1.45839
	6227-02_panTail	17	Female	26.4				Non-Diabetic	6227-02_panTail	2.53857	3.36425	2.95077	2.9512	0.412837
	6462-01A_panTail	13.52	Female	15.2				Non-Diabetic	6462-01A_panTail	2.74523	3.47044	1.58786	2.60118	0.949519
	6482-01A_panTail	18.69	Female	20				Non-Diabetic	6482-01A_panTail	3.36005	3.5796	0.961409	2.63368	1.45239
	6501-01A-panTail	12.85	Male	15.8				Non-Diabetic	6501-01A-panTail	2.00583	2.40593	1.56964	1.9938	0.418273
	6509-06A_panOther	18.72	Male	25.8				Non-Diabetic	6509-06A_panOther	1.34451	0.975669	0.816568	1.04558	0.270828
	6493-01A_panTail	18.84	Male	17.7				Non-Diabetic	6493-01A_panTail	3.40988	2.41962	2.21432	2.68128	0.639287
	6234-02_panHead	20	Female	25.6				Non-Diabetic	6234-02_panHead	2.69503	1.77618	0.165496	1.54557	1.28044
	n=15	Age (years)	Sex	BMI (Kg/m2)	Duration of disease (Years)				n=15	Insulin	FBXL19	DLG5	Average	SD
	6259-01A-panTail	57	Male	32.3	10			T2D	6259-01A-panTail	0.533546	0.596184	0.6875	0.605743	0.0774209
	6499-04A_panOther	18.6	Male	36.6	3			T2D	6499-04A_panOther	2.04201	2.06111	1.26354	1.78889	0.455065
	6252-01_panTail	20	Male	37.8				T2D	6252-01_panTail	2.04126	1.74011	1.61962	1.80033	0.217172
	6255-01_panTail	55	Male	29.4	6			T2D	6255-01_panTail	1.44899	1.98784	0.553419	1.33008	0.724564
	6280-01_panTail	47	Male	28.1	10			T2D	6280-01_panTail	0.733795	1.18515	0.348694	0.75588	0.418665
	6028-01_panTail	33.2	Male	30.2	17			T2D	6028-01_panTail	0.269399	0.525794	0.165496	0.32023	0.185449
	6114-01-panTail	42.8	Male	31	2			T2D	6114-01-panTail	2.51497	1.76772	1.9849	2.0892	0.384389
	6149-01_panTail	39.3	Female	29.1	16			T2D	6149-01_panTail	2.45947	2.26798	1.68058	2.13601	0.405868
	6189-01_panTail	48.5	Female	36.1	26			T2D	6189-01_panTail	1.60473	4.30182	0.311196	2.07258	2.03604
	6194-01_panTail	47.4	Male	29.5	13			T2D	6194-01_panTail	1.89526	3.68636	3.43647	3.00603	0.970034
	6272-01_panTail	57	Female	29.6	10			T2D	6272-01_panTail	1.58079	1.43649	1.66375	1.56034	0.114998
	6277-01_panTail	48	Male	29.5	10			T2D	6277-01_panTail	0.785944	0.755061	0.990721	0.843909	0.128078
	6283-01-panTail	56	Female	28.1	17			T2D	6283-01-panTail	4.73841	4.81288	8.94031	6.16387	2.40476
	6308-01_panTail	13	Female	34.1	1			T2D	6308-01_panTail	1.15507	3.48919	1.41023	2.01816	1.28032
	6199-04_panTail	53	Male	29.6	20			T2D	6199-04_panTail	1.66402	2.33392	1.13774	1.71189	0.599524
	n=18	Age (years)	Sex	BMI (Kg/m2)	Duration of disease (Years)				n=18	Insulin	FBXL19	DLG5	Average	SD
	5000-01_panTail	18.76	Female	25.03	2			T1D	5000-01_panTail	1.15563	0.335439	0.653222	0.714763	0.337657
	6039-01_panTail	28.7	Female	23.4	12			T1D	6039-01_panTail	0	0.488621	0.274506	0.254376	0.199986
	6070-01_panTail	22.6	Female	21.6	7			T1D	6070-01_panTail	0.121809	0.525692	0.423255	0.356919	0.171427
	6228-01_panTail	13	Male	17.36	0			T1D	6228-01_panTail	1.52073	0.826661	0.934195	1.09386	0.305019
	6265-01_panTail	11	Male	12.85	8			T1D	6265-01_panTail	0	0.0740606	0.180351	0.084804	0.074019
	6438-01_panTail	39.01	Female	35	10			T1D	6438-01_panTail	0.295598	0.0358321	0.308146	0.213192	0.125517
	6341-01_panTail	26	Male	21.8	15			T1D	6341-01_panTail	0	0.71037	0.31592	0.342097	0.290598
	6371-04_panTail	12.5	Female	16.6	2			T1D	6371-04_panTail	0	0.107903	0.190081	0.0993282	0.0778369
	6414-02_panTail	23.1	Male	28.4	0.43			T1D	6414-02_panTail	2.0821	2.45236	1.17718	1.90388	0.656003
	6456-01A_panTail	30.49	Female	30.1	0			T1D	6456-01A_panTail	2.48295	1.16664	1.45548	1.70169	0.56488
	6484-02A_panOther	28	Male	24.9	10			T1D	6484-02A_panOther	0	0.257237	0.216839	0.158025	0.112951
	6342-01_panHead	14	Female	24.3	2			T1D	6342-01_panHead	0	0.0224261	0.165496	0.0626409	0.0733039
	6520-01A_panTail	21.61	Male	29.3	0			T1D	6520-01A_panTail	1.31225	2.45944	1.37632	1.716	0.526338
	6399-03B_panOther	17	Male	32	0			T1D	6399-03B_panOther	0.186934	0.731263	0.486556	0.468251	0.222598
	6380-01-panTail	11.6	Female	14.6	0			T1D	6380-01-panTail	0	0.494718	0.359154	0.284624	0.20873
	6325-01_panTail	20	Female	31.2	6			T1D	6325-01_panTail	1.44626	0.573645	0.891412	0.970438	0.360598
	6268-01_panTail	12	Female	26.6	3			T1D	6268-01_panTail	0	0.900265	0.360318	0.420194	0.369962
	6195-06_panBody	19.3	Male	23.7	5			T1D	6195-06_panBody	0	0.225633	0.209929	0.145187	0.102863
Graph 4E
ND	n=24	Age (years)	Sex	BMI (Kg/m2)					After formula	% Insulin+ staining
	6019-01_panTail	42	Male	31				Non-Diabetic	6019-01_panTail	1.22277
	6134-01_panTail	26.7	Male	20.1				Non-Diabetic	6134-01_panTail	0.591935
	6160-01_panTail	22.1	Male	23.9				Non-Diabetic	6160-01_panTail	0.392885
	6389-01-panTail	18.6	Male	20.93				Non-Diabetic	6389-01-panTail	0.475557
	6420-01_panTail	11.5	Male	15.4				Non-Diabetic	6420-01_panTail	0.557945
	6365-01_panTail	13	Male	35.8				Non-Diabetic	6365-01_panTail	0.837352
	6131-01_panTail	24.2	Male	24.8				Non-Diabetic	6131-01_panTail	0.628857
	6017-01_panTail	59	Female	24.8				Non-Diabetic	6017-01_panTail	1.2332
	6057-01_panTail	22	Male	26				Non-Diabetic	6057-01_panTail	0.610495
	6162-01_panTail	22.7	Male	28.9				Non-Diabetic	6162-01_panTail	0.444146
	6229-01_panTail	31	Female	26.9				Non-Diabetic	6229-01_panTail	1.27856
	6290-01_panTail	58	Male	22.51				Non-Diabetic	6290-01_panTail	0.86054
	6412-01A_panTail	17.58	Female	24				Non-Diabetic	6412-01A_panTail	1.06346
	6425-01A_panTail	38.66	Female	28.3				Non-Diabetic	6425-01A_panTail	0.774482
	6431-01A-panTail	13.8	Male	23.1				Non-Diabetic	6431-01A-panTail	0.931706
	6439-01_panTail	27	Male	29.1				Non-Diabetic	6439-01_panTail	0.624562
	6445-01_panTail	17.25	Male	20.6				Non-Diabetic	6445-01_panTail	1.12647
	6227-02_panTail	17	Female	26.4				Non-Diabetic	6227-02_panTail	0.775865
	6462-01A_panTail	13.52	Female	15.2				Non-Diabetic	6462-01A_panTail	0.518554
	6482-01A_panTail	18.69	Female	20				Non-Diabetic	6482-01A_panTail	0.615291
	6501-01A-panTail	12.85	Male	15.8				Non-Diabetic	6501-01A-panTail	0.945148
	6509-06A_panOther	18.72	Male	25.8				Non-Diabetic	6509-06A_panOther	0.269131
	6493-01A_panTail	18.84	Male	17.7				Non-Diabetic	6493-01A_panTail	1.29276
	6234-02_panHead	20	Female	25.6				Non-Diabetic	6234-02_panHead	0.463057
	n=15	Age (years)	Sex	BMI (Kg/m2)	Duration of disease (Years)					% Insulin+ staining
	6259-01A-panTail	57	Male	32.3	10			T2D	6259-01A-panTail	0.507975
	6499-04A_panOther	18.6	Male	36.6	3			T2D	6499-04A_panOther	0.575517
	6252-01_panTail	20	Male	37.8				T2D	6252-01_panTail	0.590207
	6255-01_panTail	55	Male	29.4	6			T2D	6255-01_panTail	0.435466
	6280-01_panTail	47	Male	28.1	10			T2D	6280-01_panTail	0.239948
	6028-01_panTail	33.2	Male	30.2	17			T2D	6028-01_panTail	0.196612
	6114-01-panTail	42.8	Male	31	2			T2D	6114-01-panTail	0.861735
	6149-01_panTail	39.3	Female	29.1	16			T2D	6149-01_panTail	0.617628
	6189-01_panTail	48.5	Female	36.1	26			T2D	6189-01_panTail	0.640233
	6194-01_panTail	47.4	Male	29.5	13			T2D	6194-01_panTail	1.50078
	6272-01_panTail	57	Female	29.6	10			T2D	6272-01_panTail	0.826586
	6277-01_panTail	48	Male	29.5	10			T2D	6277-01_panTail	0.591076
	6283-01-panTail	56	Female	28.1	17			T2D	6283-01-panTail	0.912734
	6308-01_panTail	13	Female	34.1	1			T2D	6308-01_panTail	0.721826
	6199-04_panTail	53	Male	29.6	20			T2D	6199-04_panTail	0.454471
	n=18	Age (years)	Sex	BMI (Kg/m2)	Duration of disease (Years)					% Insulin+ staining
	5000-01_panTail	18.76	Female	25.03	2			T1D	5000-01_panTail	0.20369
	6039-01_panTail	28.7	Female	23.4	12			T1D	6039-01_panTail	0.0467204
	6070-01_panTail	22.6	Female	21.6	7			T1D	6070-01_panTail	0.144978
	6228-01_panTail	13	Male	17.36	0			T1D	6228-01_panTail	0.169375
	6265-01_panTail	11	Male	12.85	8			T1D	6265-01_panTail	0
	6438-01_panTail	39.01	Female	35	10			T1D	6438-01_panTail	0
	6341-01_panTail	26	Male	21.8	15			T1D	6341-01_panTail	0
	6371-04_panTail	12.5	Female	16.6	2			T1D	6371-04_panTail	0.0435929
	6414-02_panTail	23.1	Male	28.4	0.43			T1D	6414-02_panTail	0.288834
	6456-01A_panTail	30.49	Female	30.1	0			T1D	6456-01A_panTail	0.621697
	6484-02A_panOther	28	Male	24.9	10			T1D	6484-02A_panOther	0.0250627
	6342-01_panHead	14	Female	24.3	2			T1D	6342-01_panHead	0.00991474
	6520-01A_panTail	21.61	Male	29.3	0			T1D	6520-01A_panTail	0.603933
	6399-03B_panOther	17	Male	32	0			T1D	6399-03B_panOther	0.249063
	6380-01-panTail	11.6	Female	14.6	0			T1D	6380-01-panTail	0.193377
	6325-01_panTail	20	Female	31.2	6			T1D	6325-01_panTail	0.139594
	6268-01_panTail	12	Female	26.6	3			T1D	6268-01_panTail	0.0625313
	6195-06_panBody	19.3	Male	23.7	5			T1D	6195-06_panBody	0
Graph 4F
								Beta-cell mass
Non-Diabetic	n=20	Age (years)	Sex	BMI (Kg/m2)					n=20	% Beta-cell DNA	Pancreas weight (g)	Beta-cell mass (g) using methylation
	6134-01_panTail	26.7	Male	20.1				Non Diabetic	6134-01_panTail	2.05943	82.42	1.69738
	6160-01_panTail	22.1	Male	23.9				Non Diabetic	6160-01_panTail	1.32411	79.4	1.05134
	6389-01-panTail	18.6	Male	20.93				Non Diabetic	6389-01-panTail	1.67223	65.85	1.10116
	6420-01_panTail	11.5	Male	15.4				Non Diabetic	6420-01_panTail	1.5995	38.83	0.621087
	6365-01_panTail	13	Male	35.8				Non Diabetic	6365-01_panTail	0.991303	77.93	0.772523
	6131-01_panTail	24.2	Male	24.8				Non Diabetic	6131-01_panTail	2.10899	108.92	2.29711
	6057-01_panTail	22	Male	26				Non Diabetic	6057-01_panTail	1.87571	104.36	1.95749
	6162-01_panTail	22.7	Male	28.9				Non Diabetic	6162-01_panTail	1.8268	81.5	1.48884
	6229-01_panTail	31	Female	26.9				Non Diabetic	6229-01_panTail	2.05136	45.6	0.935421
	6290-01_panTail	58	Male	22.51				Non Diabetic	6290-01_panTail	3.46932	85.84	2.97806
	6412-01A_panTail	17.58	Female	24				Non Diabetic	6412-01A_panTail	1.61697	80.78	1.30619
	6431-01A-panTail	13.8	Male	23.1				Non Diabetic	6431-01A-panTail	1.68885	68.97	1.1648
	6439-01_panTail	27	Male	29.1				Non Diabetic	6439-01_panTail	1.50382	72.68	1.09298
	6445-01_panTail	17.25	Male	20.6				Non Diabetic	6445-01_panTail	1.6897	64.09	1.08293
	6227-02_panTail	17	Female	26.4				Non Diabetic	6227-02_panTail	2.9512	60.4	1.78252
	6462-01A_panTail	13.52	Female	15.2				Non Diabetic	6462-01A_panTail	2.60118	59.29	1.54224
	6482-01A_panTail	18.69	Female	20				Non Diabetic	6482-01A_panTail	2.63368	57.64	1.51806
	6501-01A-panTail	12.85	Male	15.8				Non Diabetic	6501-01A-panTail	1.9938	52.26	1.04196
	6493-01A_panTail	18.84	Male	17.7				Non Diabetic	6493-01A_panTail	2.68128	53.77	1.44172
	6234-02_panHead	20	Female	25.6				Non Diabetic	6234-02_panHead	1.54557	49.86	0.77062
T2D	n=14	Age (years)	Sex	BMI (Kg/m2)	Duration of disease (Years)				n=14	% Beta-cell DNA	Pancreas weight (g)	Beta-cell mass (g) using methylation
	6259-01A-panTail	57	Male	32.3	10			T2D	6259-01A-panTail	0.605743	189.6	1.14849
	6252-01_panTail	20	Male	37.8				T2D	6252-01_panTail	1.80033	79.33	1.4282
	6255-01_panTail	55	Male	29.4	6			T2D	6255-01_panTail	1.33008	104.16	1.38541
	6280-01_panTail	47	Male	28.1	10			T2D	6280-01_panTail	0.75588	58.86	0.444911
	6028-01_panTail	33.2	Male	30.2	17			T2D	6028-01_panTail	0.32023	48.5	0.155312
	6114-01-panTail	42.8	Male	31	2			T2D	6114-01-panTail	2.0892	100	2.0892
	6149-01_panTail	39.3	Female	29.1	16			T2D	6149-01_panTail	2.13601	66.2	1.41404
	6189-01_panTail	48.5	Female	36.1	26			T2D	6189-01_panTail	2.07258	133.7	2.77104
	6194-01_panTail	47.4	Male	29.5	13			T2D	6194-01_panTail	3.00603	57.1	1.71644
	6272-01_panTail	57	Female	29.6	10			T2D	6272-01_panTail	1.56034	72.29	1.12797
	6277-01_panTail	48	Male	29.5	10			T2D	6277-01_panTail	0.843909	74.44	0.628206
	6283-01-panTail	56	Female	28.1	17			T2D	6283-01-panTail	6.16387	111.48	6.87148
	6308-01_panTail	13	Female	34.1	1			T2D	6308-01_panTail	2.01816	71.19	1.43673
	6199-04_panTail	53	Male	29.6	20			T2D	6199-04_panTail	1.71189	114.1	1.95327
T1D	n=16	Age (years)	Sex	BMI (Kg/m2)	Duration of disease (Years)				n=16	% Beta-cell DNA	Pancreas weight (g)	Beta-cell mass (g) using methylation
	5000-01_panTail	18.76	Female	25.03	2			T1D	5000-01_panTail	0.714763	39	0.278757
	6039-01_panTail	28.7	Female	23.4	12			T1D	6039-01_panTail	0.254376	42.2	0.107346
	6070-01_panTail	22.6	Female	21.6	7			T1D	6070-01_panTail	0.356919	41.6	0.148478
	6228-01_panTail	13	Male	17.36	0			T1D	6228-01_panTail	1.09386	30.35	0.331988
	6265-01_panTail	11	Male	12.85	8			T1D	6265-01_panTail	0.084804	18.48	0.0156718
	6438-01_panTail	39.01	Female	35	10			T1D	6438-01_panTail	0.213192	39.93	0.0851276
	6341-01_panTail	26	Male	21.8	15			T1D	6341-01_panTail	0.342097	26.41	0.0903477
	6371-04_panTail	12.5	Female	16.6	2			T1D	6371-04_panTail	0.0993282	22.76	0.0226071
	6414-02_panTail	23.1	Male	28.4	0.43			T1D	6414-02_panTail	1.90388	98.5	1.87532
	6456-01A_panTail	30.49	Female	30.1	0			T1D	6456-01A_panTail	1.70169	84.97	1.44593
	6342-01_panHead	14	Female	24.3	2			T1D	6342-01_panHead	0.0626409	34	0.0212979
	6520-01A_panTail	21.61	Male	29.3	0			T1D	6520-01A_panTail	1.716	51.78	0.888547
	6380-01-panTail	11.6	Female	14.6	0			T1D	6380-01-panTail	0.284624	34.26	0.0975121
	6325-01_panTail	20	Female	31.2	6			T1D	6325-01_panTail	0.970438	41.03	0.398171
	6268-01_panTail	12	Female	26.6	3			T1D	6268-01_panTail	0.420194	41.1	0.1727
	6195-06_panBody	19.3	Male	23.7	5			T1D	6195-06_panBody	0.145187	29.8	0.0432658
Graph 4G
Non-Diabetic								Beta-cell mass	n=20	% Insulin+ staining	Pancreas weight (g)	Beta-cell mass (g) using staining
	n=20	Age (years)	Sex	BMI (Kg/m2)				Non Diabetic	6134-01_panTail	0.591935	82.42	0.487873
	6134-01_panTail	26.7	Male	20.1				Non Diabetic	6160-01_panTail	0.392885	79.4	0.311951
	6160-01_panTail	22.1	Male	23.9				Non Diabetic	6389-01-panTail	0.475557	65.85	0.313155
	6389-01-panTail	18.6	Male	20.93				Non Diabetic	6420-01_panTail	0.557945	38.83	0.21665
	6420-01_panTail	11.5	Male	15.4				Non Diabetic	6365-01_panTail	0.837352	77.93	0.652548
	6365-01_panTail	13	Male	35.8				Non Diabetic	6131-01_panTail	0.628857	108.92	0.684951
	6131-01_panTail	24.2	Male	24.8				Non Diabetic	6057-01_panTail	0.610495	104.36	0.637112
	6057-01_panTail	22	Male	26				Non Diabetic	6162-01_panTail	0.444146	81.5	0.361979
	6162-01_panTail	22.7	Male	28.9				Non Diabetic	6229-01_panTail	1.27856	45.6	0.583023
	6229-01_panTail	31	Female	26.9				Non Diabetic	6290-01_panTail	0.86054	85.84	0.738687
	6290-01_panTail	58	Male	22.51				Non Diabetic	6412-01A_panTail	1.06346	80.78	0.859061
	6412-01A_panTail	17.58	Female	24				Non Diabetic	6431-01A-panTail	0.931706	68.97	0.642598
	6431-01A-panTail	13.8	Male	23.1				Non Diabetic	6439-01_panTail	0.624562	72.68	0.453931
	6439-01_panTail	27	Male	29.1				Non Diabetic	6445-01_panTail	1.12647	64.09	0.721957
	6445-01_panTail	17.25	Male	20.6				Non Diabetic	6227-02_panTail	0.775865	60.4	0.468623
	6227-02_panTail	17	Female	26.4				Non Diabetic	6462-01A_panTail	0.518554	59.29	0.307451
	6462-01A_panTail	13.52	Female	15.2				Non Diabetic	6482-01A_panTail	0.615291	57.64	0.354654
	6482-01A_panTail	18.69	Female	20				Non Diabetic	6501-01A-panTail	0.945148	52.26	0.493934
	6501-01A-panTail	12.85	Male	15.8				Non Diabetic	6493-01A_panTail	1.29276	53.77	0.695116
	6493-01A_panTail	18.84	Male	17.7				Non Diabetic	6234-02_panHead	0.463057	49.86	0.23088
	6234-02_panHead	20	Female	25.6
T2D	n=14	Age (years)	Sex	BMI (Kg/m2)	Duration of disease (Years)				n=14	% Insulin+ staining	Pancreas weight (g)	Beta-cell mass (g) using staining
	6259-01A-panTail	57	Male	32.3	10			T2D	6259-01A-panTail	0.507975	189.6	0.96312
	6252-01_panTail	20	Male	37.8				T2D	6252-01_panTail	0.590207	79.33	0.468211
	6255-01_panTail	55	Male	29.4	6			T2D	6255-01_panTail	0.435466	104.16	0.453581
	6280-01_panTail	47	Male	28.1	10			T2D	6280-01_panTail	0.239948	58.86	0.141233
	6028-01_panTail	33.2	Male	30.2	17			T2D	6028-01_panTail	0.196612	48.5	0.0953568
	6114-01-panTail	42.8	Male	31	2			T2D	6114-01-panTail	0.861735	100	0.861735
	6149-01_panTail	39.3	Female	29.1	16			T2D	6149-01_panTail	0.617628	66.2	0.40887
	6189-01_panTail	48.5	Female	36.1	26			T2D	6189-01_panTail	0.640233	133.7	0.855991
	6194-01_panTail	47.4	Male	29.5	13			T2D	6194-01_panTail	1.50078	57.1	0.856947
	6272-01_panTail	57	Female	29.6	10			T2D	6272-01_panTail	0.826586	72.29	0.597539
	6277-01_panTail	48	Male	29.5	10			T2D	6277-01_panTail	0.591076	74.44	0.439997
	6283-01-panTail	56	Female	28.1	17			T2D	6283-01-panTail	0.912734	111.48	1.01752
	6308-01_panTail	13	Female	34.1	1			T2D	6308-01_panTail	0.721826	71.19	0.513868
	6199-04_panTail	53	Male	29.6	20			T2D	6199-04_panTail	0.454471	114.1	0.518552
T1D	n=16	Age (years)	Sex	BMI (Kg/m2)	Duration of disease (Years)				n=16	% Insulin+ staining	Pancreas weight (g)	Beta-cell mass (g) using staining
	5000-01_panTail	18.76	Female	25.03	2			T1D	5000-01_panTail	0.20369	39	0.0794392
	6039-01_panTail	28.7	Female	23.4	12			T1D	6039-01_panTail	0.0467204	42.2	0.019716
	6070-01_panTail	22.6	Female	21.6	7			T1D	6070-01_panTail	0.144978	41.6	0.0603107
	6228-01_panTail	13	Male	17.36	0			T1D	6228-01_panTail	0.169375	30.35	0.0514052
	6265-01_panTail	11	Male	12.85	8			T1D	6265-01_panTail	0	18.48	0
	6438-01_panTail	39.01	Female	35	10			T1D	6438-01_panTail	0	39.93	0
	6341-01_panTail	26	Male	21.8	15			T1D	6341-01_panTail	0	26.41	0
	6371-04_panTail	12.5	Female	16.6	2			T1D	6371-04_panTail	0.0435929	22.76	0.00992175
	6414-02_panTail	23.1	Male	28.4	0.43			T1D	6414-02_panTail	0.288834	98.5	0.284502
	6456-01A_panTail	30.49	Female	30.1	0			T1D	6456-01A_panTail	0.621697	84.97	0.528256
	6342-01_panHead	14	Female	24.3	2			T1D	6342-01_panHead	0.00991474	34	0.00337101
	6520-01A_panTail	21.61	Male	29.3	0			T1D	6520-01A_panTail	0.603933	51.78	0.312716
	6380-01-panTail	11.6	Female	14.6	0			T1D	6380-01-panTail	0.193377	34.26	0.0662511
	6325-01_panTail	20	Female	31.2	6			T1D	6325-01_panTail	0.139594	41.03	0.0572752
	6268-01_panTail	12	Female	26.6	3			T1D	6268-01_panTail	0.0625313	41.1	0.0257004
	6195-06_panBody	19.3	Male	23.7	5			T1D	6195-06_panBody	0	29.8	0
Graph 4H
ND	n=24	Age (years)	Sex	BMI (Kg/m2)					n=24	CCDC73	PDX1-AS1	PELI2	% Alpha-cell DNA FINAL	SD
	6019-01_panTail	42	Male	31				Non-Diabetic	6019-01_panTail	2.90133	5.30886	2.58296	3.59772	1.49042
	6134-01_panTail	26.7	Male	20.1				Non-Diabetic	6134-01_panTail	2.12603	2.3985	1.39488	1.97313	0.518988
	6160-01_panTail	22.1	Male	23.9				Non-Diabetic	6160-01_panTail	1.86068	4.29843	0	2.05304	2.15566
	6389-01-panTail	18.6	Male	20.93				Non-Diabetic	6389-01-panTail	0.907597	0.905862	0.348164	0.720541	0.322489
	6420-01_panTail	11.5	Male	15.4				Non-Diabetic	6420-01_panTail	0.758381	0.961314	0.579263	0.766319	0.191149
	6365-01_panTail	13	Male	35.8				Non-Diabetic	6365-01_panTail	0.798934	1.45033	0.535554	0.928272	0.470903
	6131-01_panTail	24.2	Male	24.8				Non-Diabetic	6131-01_panTail	0.715451	5.15781	1.28808	2.38711	2.41651
	6017-01_panTail	59	Female	24.8				Non-Diabetic	6017-01_panTail	2.09021	1.05894	1.27209	1.47375	0.544405
	6057-01_panTail	22	Male	26				Non-Diabetic	6057-01_panTail	0.877305	2.46374	0.539574	1.29354	1.0274
	6162-01_panTail	22.7	Male	28.9				Non-Diabetic	6162-01_panTail	0	0.675563	0.91521	0.530257	0.474592
	6229-01_panTail	31	Female	26.9				Non-Diabetic	6229-01_panTail	0	2.18276	0.0169894	0.73325	1.25534
	6290-01_panTail	58	Male	22.51				Non-Diabetic	6290-01_panTail	1.08363	1.06049	0.53057	0.891565	0.312845
	6412-01A_panTail	17.58	Female	24				Non-Diabetic	6412-01A_panTail	1.13946	1.61475	1.40304	1.38575	0.238115
	6425-01A_panTail	38.66	Female	28.3				Non-Diabetic	6425-01A_panTail	0.54794	2.51985	0.520172	1.19599	1.14658
	6431-01A-panTail	13.8	Male	23.1				Non-Diabetic	6431-01A-panTail	0.717589	0.929936	0.622566	0.756697	0.157373
	6439-01_panTail	27	Male	29.1				Non-Diabetic	6439-01_panTail	0.959528	2.58417	0.277203	1.27363	1.18512
	6445-01_panTail	17.25	Male	20.6				Non-Diabetic	6445-01_panTail	1.26972	3.88724	1.07333	2.07677	1.57099
	6227-02_panTail	17	Female	26.4				Non-Diabetic	6227-02_panTail	1.69033	1.32843	0	1.00625	0.890028
	6462-01A_panTail	13.52	Female	15.2				Non-Diabetic	6462-01A_panTail	0.0335339	0.854121	0.537434	0.475029	0.413837
	6482-01A_panTail	18.69	Female	20				Non-Diabetic	6482-01A_panTail	1.22211	0.99492	0.385513	0.867514	0.432605
	6501-01A-panTail	12.85	Male	15.8				Non-Diabetic	6501-01A-panTail	0.425033	0.474241	0.470238	0.456504	0.027328
	6509-06A_panOther	18.72	Male	25.8				Non-Diabetic	6509-06A_panOther	0.123418	1.53626	0	0.553226	0.853566
	6493-01A_panTail	18.84	Male	17.7				Non-Diabetic	6493-01A_panTail	0.805558	2.25982	0.912251	1.32588	0.810576
	6234-02_panHead	20	Female	25.6				Non-Diabetic	6234-02_panHead	0	0.279754	0	0.0932513	0.161516
	n=15	Age (years)	Sex	BMI (Kg/m2)	Duration of disease (Years)				n=15	CCDC73	PDX1-AS1	PELI2	% Alpha-cell DNA FINAL	SD
	6259-01A-panTail	57	Male	32.3	10			T2D	6259-01A-panTail	0.540793	2.3247	0.539942	1.13514	1.03018
	6499-04A_panOther	18.6	Male	36.6	3			T2D	6499-04A_panOther	1.14559	1.70693	1.35848	1.40367	0.283386
	6252-01_panTail	20	Male	37.8				T2D	6252-01_panTail	0.551152	1.75297	0.930599	1.07824	0.614363
	6255-01_panTail	55	Male	29.4	6			T2D	6255-01_panTail	0.297133	1.9598	0.648457	0.968462	0.876308
	6280-01_panTail	47	Male	28.1	10			T2D	6280-01_panTail	0.419184	2.97986	0.37379	1.25761	1.49168
	6028-01_panTail	33.2	Male	30.2	17			T2D	6028-01_panTail	0.22352	1.03614	0.314497	0.524717	0.445231
	6114-01-panTail	42.8	Male	31	2			T2D	6114-01-panTail	1.04812	2.28225	1.98079	1.77039	0.643407
	6149-01_panTail	39.3	Female	29.1	16			T2D	6149-01_panTail	2.82862	2.56222	2.91118	2.76734	0.182373
	6189-01_panTail	48.5	Female	36.1	26			T2D	6189-01_panTail	3.40279	2.45873	1.26461	2.37537	1.07152
	6194-01_panTail	47.4	Male	29.5	13			T2D	6194-01_panTail	3.84796	2.58752	2.57234	3.0026	0.732136
	6272-01_panTail	57	Female	29.6	10			T2D	6272-01_panTail	4.87718	4.33661	3.59693	4.27024	0.642702
	6277-01_panTail	48	Male	29.5	10			T2D	6277-01_panTail	0.823932	0.728798	0.683387	0.745372	0.0717235
	6283-01-panTail	56	Female	28.1	17			T2D	6283-01-panTail	5.30827	0.622309	2.4382	2.78959	2.36266
	6308-01_panTail	13	Female	34.1	1			T2D	6308-01_panTail	0.417185	1.49471	0.542241	0.818045	0.589335
	6199-04_panTail	53	Male	29.6	20			T2D	6199-04_panTail	2.73998	3.4759	3.21413	3.14334	0.373034
	n=18	Age (years)	Sex	BMI (Kg/m2)	Duration of disease (Years)				n=18	CCDC73	PDX1-AS1	PELI2	% Alpha-cell DNA FINAL	SD
	5000-01_panTail	18.76	Female	25.03	2			T1D	5000-01_panTail	1.48833	2.73558	2.10603	2.10998	0.623633
	6039-01_panTail	28.7	Female	23.4	12			T1D	6039-01_panTail	0.263826	7.10869	0.977473	2.78333	3.76283
	6070-01_panTail	22.6	Female	21.6	7			T1D	6070-01_panTail	1.11565	3.96606	1.98351	2.35508	1.46108
	6228-01_panTail	13	Male	17.36	0			T1D	6228-01_panTail	1.20035	3.41942	0.708089	1.77595	1.44441
	6265-01_panTail	11	Male	12.85	8			T1D	6265-01_panTail	1.39164	1.58738	1.23913	1.40605	0.174571
	6438-01_panTail	39.01	Female	35	10			T1D	6438-01_panTail	2.44206	3.80653	1.39989	2.54949	1.20691
	6341-01_panTail	26	Male	21.8	15			T1D	6341-01_panTail	2.06605	2.53979	1.42862	2.01149	0.557593
	6371-04_panTail	12.5	Female	16.6	2			T1D	6371-04_panTail	0.0795153	1.01581	0.0959072	0.397078	0.535903
	6414-02_panTail	23.1	Male	28.4	0.43			T1D	6414-02_panTail	1.50943	3.59776	1.25519	2.12079	1.28539
	6456-01A_panTail	30.49	Female	30.1	0			T1D	6456-01A_panTail	1.8589	3.36436	1.28122	2.16816	1.07546
	6484-02A_panOther	28	Male	24.9	10			T1D	6484-02A_panOther	8.85985	4.21066	5.85237	6.30763	2.35779
	6342-01_panHead	14	Female	24.3	2			T1D	6342-01_panHead	0.028007	1.18364	0.744264	0.651969	0.583317
	6520-01A_panTail	21.61	Male	29.3	0			T1D	6520-01A_panTail	1.04998	2.84179	0.508412	1.46672	1.22124
	6399-03B_panOther	17	Male	32	0			T1D	6399-03B_panOther	0.269307	1.97508	1.00522	1.0832	0.855556
	6380-01-panTail	11.6	Female	14.6	0			T1D	6380-01-panTail	0.551297	1.15187	0.0138244	0.572332	0.569317
	6325-01_panTail	20	Female	31.2	6			T1D	6325-01_panTail	1.17128	3.03292	0.840021	1.6814	1.18211
	6268-01_panTail	12	Female	26.6	3			T1D	6268-01_panTail	0.852651	1.29184	1.40403	1.18284	0.291404
	6195-06_panBody	19.3	Male	23.7	5			T1D	6195-06_panBody	1.91943	1.85174	1.31157	1.69425	0.333135
Graph 4I
ND	n=24	Age (years)	Sex	BMI (Kg/m2)					n=24	% Glucagon+ staining
	6019-01_panTail	42	Male	31				Non-Diabetic	6019-01_panTail	0.915238
	6134-01_panTail	26.7	Male	20.1				Non-Diabetic	6134-01_panTail	0.363816
	6160-01_panTail	22.1	Male	23.9				Non-Diabetic	6160-01_panTail	0.264402
	6389-01-panTail	18.6	Male	20.93				Non-Diabetic	6389-01-panTail	0.298736
	6420-01_panTail	11.5	Male	15.4				Non-Diabetic	6420-01_panTail	0.207554
	6365-01_panTail	13	Male	35.8				Non-Diabetic	6365-01_panTail	0.120949
	6131-01_panTail	24.2	Male	24.8				Non-Diabetic	6131-01_panTail	0.152342
	6017-01_panTail	59	Female	24.8				Non-Diabetic	6017-01_panTail	0.530289
	6057-01_panTail	22	Male	26				Non-Diabetic	6057-01_panTail	0.392208
	6162-01_panTail	22.7	Male	28.9				Non-Diabetic	6162-01_panTail	0.273121
	6229-01_panTail	31	Female	26.9				Non-Diabetic	6229-01_panTail	0.4781
	6290-01_panTail	58	Male	22.51				Non-Diabetic	6290-01_panTail	0.412611
	6412-01A_panTail	17.58	Female	24				Non-Diabetic	6412-01A_panTail	0.319416
	6425-01A_panTail	38.66	Female	28.3				Non-Diabetic	6425-01A_panTail	0.221932
	6431-01A-panTail	13.8	Male	23.1				Non-Diabetic	6431-01A-panTail	0.401181
	6439-01_panTail	27	Male	29.1				Non-Diabetic	6439-01_panTail	0.400759
	6445-01_panTail	17.25	Male	20.6				Non-Diabetic	6445-01_panTail	0.332756
	6227-02_panTail	17	Female	26.4				Non-Diabetic	6227-02_panTail	0.201146
	6462-01A_panTail	13.52	Female	15.2				Non-Diabetic	6462-01A_panTail	0.188816
	6482-01A_panTail	18.69	Female	20				Non-Diabetic	6482-01A_panTail	0.159704
	6501-01A-panTail	12.85	Male	15.8				Non-Diabetic	6501-01A-panTail	0.373296
	6509-06A_panOther	18.72	Male	25.8				Non-Diabetic	6509-06A_panOther	0.150525
	6493-01A_panTail	18.84	Male	17.7				Non-Diabetic	6493-01A_panTail	0.544817
	6234-02_panHead	20	Female	25.6				Non-Diabetic	6234-02_panHead	0.306372
T2D	n=15	Age (years)	Sex	BMI (Kg/m2)	Duration of disease (Years)				n=15	% Glucagon+ staining
	6259-01A-panTail	57	Male	32.3	10			T2D	6259-01A-panTail	0.389279
	6499-04A_panOther	18.6	Male	36.6	3			T2D	6499-04A_panOther	0.314189
	6252-01_panTail	20	Male	37.8				T2D	6252-01_panTail	0.32409
	6255-01_panTail	55	Male	29.4	6			T2D	6255-01_panTail	0.529006
	6280-01_panTail	47	Male	28.1	10			T2D	6280-01_panTail	0.0981065
	6028-01_panTail	33.2	Male	30.2	17			T2D	6028-01_panTail	0.20695
	6114-01-panTail	42.8	Male	31	2			T2D	6114-01-panTail	0.624568
	6149-01_panTail	39.3	Female	29.1	16			T2D	6149-01_panTail	0.621208
	6189-01_panTail	48.5	Female	36.1	26			T2D	6189-01_panTail	0.650564
	6194-01_panTail	47.4	Male	29.5	13			T2D	6194-01_panTail	0.754756
	6272-01_panTail	57	Female	29.6	10			T2D	6272-01_panTail	1.74403
	6277-01_panTail	48	Male	29.5	10			T2D	6277-01_panTail	0.332564
	6283-01-panTail	56	Female	28.1	17			T2D	6283-01-panTail	0.571644
	6308-01_panTail	13	Female	34.1	1			T2D	6308-01_panTail	0.331947
	6199-04_panTail	53	Male	29.6	20			T2D	6199-04_panTail	0.641886
T1D	n=18	Age (years)	Sex	BMI (Kg/m2)	Duration of disease (Years)				n=18	% Glucagon+ staining
	5000-01_panTail	18.76	Female	25.03	2			T1D	5000-01_panTail	0.658191
	6039-01_panTail	28.7	Female	23.4	12			T1D	6039-01_panTail	0.178045
	6070-01_panTail	22.6	Female	21.6	7			T1D	6070-01_panTail	0.624063
	6228-01_panTail	13	Male	17.36	0			T1D	6228-01_panTail	0.432718
	6265-01_panTail	11	Male	12.85	8			T1D	6265-01_panTail	0.277151
	6438-01_panTail	39.01	Female	35	10			T1D	6438-01_panTail	0.490247
	6341-01_panTail	26	Male	21.8	15			T1D	6341-01_panTail	0.751617
	6371-04_panTail	12.5	Female	16.6	2			T1D	6371-04_panTail	0.119344
	6414-02_panTail	23.1	Male	28.4	0.43			T1D	6414-02_panTail	0.636242
	6456-01A_panTail	30.49	Female	30.1	0			T1D	6456-01A_panTail	0.598974
	6484-02A_panOther	28	Male	24.9	10			T1D	6484-02A_panOther	3.55325
	6342-01_panHead	14	Female	24.3	2			T1D	6342-01_panHead	0.247288
	6520-01A_panTail	21.61	Male	29.3	0			T1D	6520-01A_panTail	0.545613
	6399-03B_panOther	17	Male	32	0			T1D	6399-03B_panOther	0
	6380-01-panTail	11.6	Female	14.6	0			T1D	6380-01-panTail	0.197322
	6325-01_panTail	20	Female	31.2	6			T1D	6325-01_panTail	0.50537
	6268-01_panTail	12	Female	26.6	3			T1D	6268-01_panTail	0.655909
	6195-06_panBody	19.3	Male	23.7	5			T1D	6195-06_panBody	0.584181
Graph 4J
Non-Diabetic	n=20	Age (years)	Sex	BMI (Kg/m2)					n=20	% Alpha-cell DNA FINAL	Pancreas weight (g)	Alpha-cell mass (g) using methylation
	6134-01_panTail	26.7	Male	20.1				Non-Diabetic	6134-01_panTail	1.97313	82.42	1.62626
	6160-01_panTail	22.1	Male	23.9				Non-Diabetic	6160-01_panTail	2.05304	79.4	1.63011
	6389-01-panTail	18.6	Male	20.93				Non-Diabetic	6389-01-panTail	0.720541	65.85	0.474476
	6420-01_panTail	11.5	Male	15.4				Non-Diabetic	6420-01_panTail	0.766319	38.83	0.297562
	6365-01_panTail	13	Male	35.8				Non-Diabetic	6365-01_panTail	0.928272	77.93	0.723402
	6131-01_panTail	24.2	Male	24.8				Non-Diabetic	6131-01_panTail	2.38711	108.92	2.60004
	6057-01_panTail	22	Male	26				Non-Diabetic	6057-01_panTail	1.29354	104.36	1.34994
	6162-01_panTail	22.7	Male	28.9				Non-Diabetic	6162-01_panTail	0.530257	81.5	0.43216
	6229-01_panTail	31	Female	26.9				Non-Diabetic	6229-01_panTail	0.73325	45.6	0.334362
	6290-01_panTail	58	Male	22.51				Non-Diabetic	6290-01_panTail	0.891565	85.84	0.76532
	6412-01A_panTail	17.58	Female	24				Non-Diabetic	6412-01A_panTail	1.38575	80.78	1.11941
	6431-01A-panTail	13.8	Male	23.1				Non-Diabetic	6431-01A-panTail	0.756697	68.97	0.521894
	6439-01_panTail	27	Male	29.1				Non-Diabetic	6439-01_panTail	1.27363	72.68	0.925676
	6445-01_panTail	17.25	Male	20.6				Non-Diabetic	6445-01_panTail	2.07677	64.09	1.331
	6227-02_panTail	17	Female	26.4				Non-Diabetic	6227-02_panTail	1.00625	60.4	0.607777
	6462-01A_panTail	13.52	Female	15.2				Non-Diabetic	6462-01A_panTail	0.475029	59.29	0.281645
	6482-01A_panTail	18.69	Female	20				Non-Diabetic	6482-01A_panTail	0.867514	57.64	0.500035
	6501-01A-panTail	12.85	Male	15.8				Non-Diabetic	6501-01A-panTail	0.456504	52.26	0.238569
	6493-01A_panTail	18.84	Male	17.7				Non-Diabetic	6493-01A_panTail	1.32588	53.77	0.712923
	6234-02_panHead	20	Female	25.6				Non-Diabetic	6234-02_panHead	0.0932513	49.86	0.0464951
T2D	n=14	Age (years)	Sex	BMI (Kg/m2)	Duration of disease (Years)				n=14	% Alpha-cell DNA FINAL	Pancreas weight (g)	Alpha-cell mass (g) using methylation
	6259-01A-panTail	57	Male	32.3	10			T2D	6259-01A-panTail	1.13514	189.6	2.15223
	6252-01_panTail	20	Male	37.8				T2D	6252-01_panTail	1.07824	79.33	0.855369
	6255-01_panTail	55	Male	29.4	6			T2D	6255-01_panTail	0.968462	104.16	1.00875
	6280-01_panTail	47	Male	28.1	10			T2D	6280-01_panTail	1.25761	58.86	0.740229
	6028-01_panTail	33.2	Male	30.2	17			T2D	6028-01_panTail	0.524717	48.5	0.254488
	6114-01-panTail	42.8	Male	31	2			T2D	6114-01-panTail	1.77039	100	1.77039
	6149-01_panTail	39.3	Female	29.1	16			T2D	6149-01_panTail	2.76734	66.2	1.83198
	6189-01_panTail	48.5	Female	36.1	26			T2D	6189-01_panTail	2.37537	133.7	3.17588
	6194-01_panTail	47.4	Male	29.5	13			T2D	6194-01_panTail	3.0026	57.1	1.71449
	6272-01_panTail	57	Female	29.6	10			T2D	6272-01_panTail	4.27024	72.29	3.08696
	6277-01_panTail	48	Male	29.5	10			T2D	6277-01_panTail	0.745372	74.44	0.554855
	6283-01-panTail	56	Female	28.1	17			T2D	6283-01-panTail	2.78959	111.48	3.10984
	6308-01_panTail	13	Female	34.1	1			T2D	6308-01_panTail	0.818045	71.19	0.582367
	6199-04_panTail	53	Male	29.6	20			T2D	6199-04_panTail	3.14334	114.1	3.58655
T1D	n=16	Age (years)	Sex	BMI (Kg/m2)	Duration of disease (Years)				n=16	% Alpha-cell DNA FINAL	Pancreas weight (g)	Alpha-cell mass (g) using methylation
	5000-01_panTail	18.76	Female	25.03	2			T1D	5000-01_panTail	2.10998	39	0.822893
	6039-01_panTail	28.7	Female	23.4	12			T1D	6039-01_panTail	2.78333	42.2	1.17457
	6070-01_panTail	22.6	Female	21.6	7			T1D	6070-01_panTail	2.35508	41.6	0.979711
	6228-01_panTail	13	Male	17.36	0			T1D	6228-01_panTail	1.77595	30.35	0.539002
	6265-01_panTail	11	Male	12.85	8			T1D	6265-01_panTail	1.40605	18.48	0.259838
	6438-01_panTail	39.01	Female	35	10			T1D	6438-01_panTail	2.54949	39.93	1.01801
	6341-01_panTail	26	Male	21.8	15			T1D	6341-01_panTail	2.01149	26.41	0.531233
	6371-04_panTail	12.5	Female	16.6	2			T1D	6371-04_panTail	0.397078	22.76	0.0903751
	6414-02_panTail	23.1	Male	28.4	0.43			T1D	6414-02_panTail	2.12079	98.5	2.08898
	6456-01A_panTail	30.49	Female	30.1	0			T1D	6456-01A_panTail	2.16816	84.97	1.84229
	6342-01_panHead	14	Female	24.3	2			T1D	6342-01_panHead	0.651969	34	0.221669
	6520-01A_panTail	21.61	Male	29.3	0			T1D	6520-01A_panTail	1.46672	51.78	0.75947
	6380-01-panTail	11.6	Female	14.6	0			T1D	6380-01-panTail	0.572332	34.26	0.196081
	6325-01_panTail	20	Female	31.2	6			T1D	6325-01_panTail	1.6814	41.03	0.68988
	6268-01_panTail	12	Female	26.6	3			T1D	6268-01_panTail	1.18284	41.1	0.486148
	6195-06_panBody	19.3	Male	23.7	5			T1D	6195-06_panBody	1.69425	29.8	0.504886
Graph 4K
Non-Diabetic	n=20	Age (years)	Sex	BMI (Kg/m2)					n=20	% Glucagon+ staining	Pancreas weight (g)	Alpha-cell mass (g) using staining
	6134-01_panTail	26.7	Male	20.1				Non-Diabetic	6134-01_panTail	0.363816	82.42	0.299857
	6160-01_panTail	22.1	Male	23.9				Non-Diabetic	6160-01_panTail	0.264402	79.4	0.209935
	6389-01-panTail	18.6	Male	20.93				Non-Diabetic	6389-01-panTail	0.298736	65.85	0.196718
	6420-01_panTail	11.5	Male	15.4				Non-Diabetic	6420-01_panTail	0.207554	38.83	0.0805933
	6365-01_panTail	13	Male	35.8				Non-Diabetic	6365-01_panTail	0.120949	77.93	0.0942552
	6131-01_panTail	24.2	Male	24.8				Non-Diabetic	6131-01_panTail	0.152342	108.92	0.165931
	6057-01_panTail	22	Male	26				Non-Diabetic	6057-01_panTail	0.392208	104.36	0.409308
	6162-01_panTail	22.7	Male	28.9				Non-Diabetic	6162-01_panTail	0.273121	81.5	0.222594
	6229-01_panTail	31	Female	26.9				Non-Diabetic	6229-01_panTail	0.4781	45.6	0.218014
	6290-01_panTail	58	Male	22.51				Non-Diabetic	6290-01_panTail	0.412611	85.84	0.354185
	6412-01A_panTail	17.58	Female	24				Non-Diabetic	6412-01A_panTail	0.319416	80.78	0.258024
	6431-01A-panTail	13.8	Male	23.1				Non-Diabetic	6431-01A-panTail	0.401181	68.97	0.276695
	6439-01_panTail	27	Male	29.1				Non-Diabetic	6439-01_panTail	0.400759	72.68	0.291272
	6445-01_panTail	17.25	Male	20.6				Non-Diabetic	6445-01_panTail	0.332756	64.09	0.213263
	6227-02_panTail	17	Female	26.4				Non-Diabetic	6227-02_panTail	0.201146	60.4	0.121492
	6462-01A_panTail	13.52	Female	15.2				Non-Diabetic	6462-01A_panTail	0.188816	59.29	0.111949
	6482-01A_panTail	18.69	Female	20				Non-Diabetic	6482-01A_panTail	0.159704	57.64	0.0920534
	6501-01A-panTail	12.85	Male	15.8				Non-Diabetic	6501-01A-panTail	0.373296	52.26	0.195085
	6493-01A_panTail	18.84	Male	17.7				Non-Diabetic	6493-01A_panTail	0.544817	53.77	0.292948
	6234-02_panHead	20	Female	25.6				Non-Diabetic	6234-02_panHead	0.306372	49.86	0.152757
T2D	n=14	Age (years)	Sex	BMI (Kg/m2)	Duration of disease (Years)				n=14	% Glucagon+ staining	Pancreas weight (g)	Alpha-cell mass (g) using staining
	6259-01A-panTail	57	Male	32.3	10			T2D	6259-01A-panTail	0.389279	189.6	0.738073
	6252-01_panTail	20	Male	37.8				T2D	6252-01_panTail	0.32409	79.33	0.257101
	6255-01_panTail	55	Male	29.4	6			T2D	6255-01_panTail	0.529006	104.16	0.551012
	6280-01_panTail	47	Male	28.1	10			T2D	6280-01_panTail	0.0981065	58.86	0.0577455
	6028-01_panTail	33.2	Male	30.2	17			T2D	6028-01_panTail	0.20695	48.5	0.100371
	6114-01-panTail	42.8	Male	31	2			T2D	6114-01-panTail	0.624568	100	0.624568
	6149-01_panTail	39.3	Female	29.1	16			T2D	6149-01_panTail	0.621208	66.2	0.41124
	6189-01_panTail	48.5	Female	36.1	26			T2D	6189-01_panTail	0.650564	133.7	0.869805
	6194-01_panTail	47.4	Male	29.5	13			T2D	6194-01_panTail	0.754756	57.1	0.430966
	6272-01_panTail	57	Female	29.6	10			T2D	6272-01_panTail	1.74403	72.29	1.26076
	6277-01_panTail	48	Male	29.5	10			T2D	6277-01_panTail	0.332564	74.44	0.24756
	6283-01-panTail	56	Female	28.1	17			T2D	6283-01-panTail	0.571644	111.48	0.637269
	6308-01_panTail	13	Female	34.1	1			T2D	6308-01_panTail	0.331947	71.19	0.236313
	6199-04_panTail	53	Male	29.6	20			T2D	6199-04_panTail	0.641886	114.1	0.732391
T1D	n=16	Age (years)	Sex	BMI (Kg/m2)	Duration of disease (Years)				n=16	% Glucagon+ staining	Pancreas weight (g)	Alpha-cell mass (g) using staining
	5000-01_panTail	18.76	Female	25.03	2			T1D	5000-01_panTail	0.658191	39	0.256695
	6039-01_panTail	28.7	Female	23.4	12			T1D	6039-01_panTail	0.178045	42.2	0.0751348
	6070-01_panTail	22.6	Female	21.6	7			T1D	6070-01_panTail	0.624063	41.6	0.25961
	6228-01_panTail	13	Male	17.36	0			T1D	6228-01_panTail	0.432718	30.35	0.13133
	6265-01_panTail	11	Male	12.85	8			T1D	6265-01_panTail	0.277151	18.48	0.0512175
	6438-01_panTail	39.01	Female	35	10			T1D	6438-01_panTail	0.490247	39.93	0.195756
	6341-01_panTail	26	Male	21.8	15			T1D	6341-01_panTail	0.751617	26.41	0.198502
	6371-04_panTail	12.5	Female	16.6	2			T1D	6371-04_panTail	0.119344	22.76	0.0271627
	6414-02_panTail	23.1	Male	28.4	0.43			T1D	6414-02_panTail	0.636242	98.5	0.626698
	6456-01A_panTail	30.49	Female	30.1	0			T1D	6456-01A_panTail	0.598974	84.97	0.508948
	6342-01_panHead	14	Female	24.3	2			T1D	6342-01_panHead	0.247288	34	0.0840778
	6520-01A_panTail	21.61	Male	29.3	0			T1D	6520-01A_panTail	0.545613	51.78	0.282519
	6380-01-panTail	11.6	Female	14.6	0			T1D	6380-01-panTail	0.197322	34.26	0.0676024
	6325-01_panTail	20	Female	31.2	6			T1D	6325-01_panTail	0.50537	41.03	0.207353
	6268-01_panTail	12	Female	26.6	3			T1D	6268-01_panTail	0.655909	41.1	0.269579
	6195-06_panBody	19.3	Male	23.7	5			T1D	6195-06_panBody	0.584181	29.8	0.174086

## Sheet: Supplementary Figure 3
Graph S3A
n=18	Age (years)	Sex	BMI (Kg/m2)	Duration of disease (Years)				n=18	Beta-cell DNA	DNA concentration (ng)	ng Beta-cell DNA	Duration of disease (Years)
5000-01_panTail	18.76	Female	25.03	2			T1D	5000-01_panTail	0.714763	348	2.48737	2
6039-01_panTail	28.7	Female	23.4	12			T1D	6039-01_panTail	0.254376	568	1.44485	12
6070-01_panTail	22.6	Female	21.6	7			T1D	6070-01_panTail	0.356919	656	2.34139	7
6228-01_panTail	13	Male	17.36	0			T1D	6228-01_panTail	1.09386	254.4	2.78279	0
6265-01_panTail	11	Male	12.85	8			T1D	6265-01_panTail	0.084804	720	0.610589	8
6438-01_panTail	39.01	Female	35	10			T1D	6438-01_panTail	0.213192	1128	2.40481	10
6341-01_panTail	26	Male	21.8	15			T1D	6341-01_panTail	0.342097	668	2.28521	15
6371-04_panTail	12.5	Female	16.6	2			T1D	6371-04_panTail	0.0993282	379.2	0.376653	2
6414-02_panTail	23.1	Male	28.4	0.43			T1D	6414-02_panTail	1.90388	636	12.1087	0.43
6456-01A_panTail	30.49	Female	30.1	0			T1D	6456-01A_panTail	1.70169	944	16.064	0
6484-02A_panOther	28	Male	24.9	10			T1D	6484-02A_panOther	0.158025	158.4	0.250312	10
6342-01_panHead	14	Female	24.3	2			T1D	6342-01_panHead	0.0626409	57.2	0.0358306	2
6520-01A_panTail	21.61	Male	29.3	0			T1D	6520-01A_panTail	1.716	2744	47.0872	0
6399-03B_panOther	17	Male	32	0			T1D	6399-03B_panOther	0.468251	278.4	1.30361	0
6380-01-panTail	11.6	Female	14.6	0			T1D	6380-01-panTail	0.284624	2256	6.42111	0
6325-01_panTail	20	Female	31.2	6			T1D	6325-01_panTail	0.970438	1832	17.7784	6
6268-01_panTail	12	Female	26.6	3			T1D	6268-01_panTail	0.420194	176	0.739542	3
6195-06_panBody	19.3	Male	23.7	5			T1D	6195-06_panBody	0.145187	347.2	0.504091	5
Graph S3B
n=18	Age (years)	Sex	BMI (Kg/m2)	Duration of disease (Years)				n=18	Beta-cell DNA	DNA concentration (ng)	ng Beta-cell DNA	Age at onset (Years)
5000-01_panTail	18.76	Female	25.03	2			T1D	5000-01_panTail	0.714763	348	2.48737	16.76
6039-01_panTail	28.7	Female	23.4	12			T1D	6039-01_panTail	0.254376	568	1.44485	16.7
6070-01_panTail	22.6	Female	21.6	7			T1D	6070-01_panTail	0.356919	656	2.34139	15.6
6228-01_panTail	13	Male	17.36	0			T1D	6228-01_panTail	1.09386	254.4	2.78279	13
6265-01_panTail	11	Male	12.85	8			T1D	6265-01_panTail	0.084804	720	0.610589	3
6438-01_panTail	39.01	Female	35	10			T1D	6438-01_panTail	0.213192	1128	2.40481	29.01
6341-01_panTail	26	Male	21.8	15			T1D	6341-01_panTail	0.342097	668	2.28521	11
6371-04_panTail	12.5	Female	16.6	2			T1D	6371-04_panTail	0.0993282	379.2	0.376653	10.5
6414-02_panTail	23.1	Male	28.4	0.43			T1D	6414-02_panTail	1.90388	636	12.1087	22.67
6456-01A_panTail	30.49	Female	30.1	0			T1D	6456-01A_panTail	1.70169	944	16.064	30.49
6484-02A_panOther	28	Male	24.9	10			T1D	6484-02A_panOther	0.158025	158.4	0.250312	18
6342-01_panHead	14	Female	24.3	2			T1D	6342-01_panHead	0.0626409	57.2	0.0358306	12
6520-01A_panTail	21.61	Male	29.3	0			T1D	6520-01A_panTail	1.716	2744	47.0872	21.61
6399-03B_panOther	17	Male	32	0			T1D	6399-03B_panOther	0.468251	278.4	1.30361	17
6380-01-panTail	11.6	Female	14.6	0			T1D	6380-01-panTail	0.284624	2256	6.42111	11.6
6325-01_panTail	20	Female	31.2	6			T1D	6325-01_panTail	0.970438	1832	17.7784	14
6268-01_panTail	12	Female	26.6	3			T1D	6268-01_panTail	0.420194	176	0.739542	9
6195-06_panBody	19.3	Male	23.7	5			T1D	6195-06_panBody	0.145187	347.2	0.504091	14.3
